# Supplementary material for: Differential expression analysis for sequence count data
Source: Genome Biol. 2010 Oct 27;11(10):R106. doi: 10.1186/gb-2010-11-10-r106 (PMC3218662; doi:10.1186/gb-2010-11-10-r106)
Supplement: Additional file 3 — Raw data. Tarball containing the raw data for the presented analyses. [file gb-2010-11-10-r106-S3.TGZ]

Archive with 6 entries (5 files):
- suppl_data
- suppl_data/suppl_ii.Rnw
- suppl_data/NeuralStemCellData.tab
- suppl_data/fly_RNA_counts.tsv
- suppl_data/PolII_counts.tsv
- suppl_data/counts_Nagalakshmi_et_al.tab
