# Supplementary material for: Differential expression analysis for sequence count data
Source: Genome Biol. 2010 Oct 27;11(10):R106. doi: 10.1186/gb-2010-11-10-r106 (PMC3218662; doi:10.1186/gb-2010-11-10-r106)
Supplement: Additional file 3 — Raw data. Tarball containing the raw data for the presented analyses. [file gb-2010-11-10-r106-S3.TGZ › suppl_data/counts_Nagalakshmi_et_al.tab]

	dT_bio	dT_ori	dT_tech	RH_bio	RH_ori	RH_tech
15S_rRNA	6	20	31	79	51	65
21S_rRNA	531	530	755	932	285	369
HRA1	1	0	0	1	2	3
LSR1	3	3	12	371	126	202
NME1	3	5	7	9	7	7
Q0010	0	1	4	0	0	0
Q0017	0	0	0	0	0	0
Q0032	0	5	6	0	3	2
Q0045	40	53	100	16	33	36
Q0050	18	66	91	85	56	67
Q0055	38	72	98	56	49	60
Q0060	5	37	48	16	20	17
Q0065	41	81	95	21	23	28
Q0070	49	93	115	22	32	27
Q0075	22	40	73	22	23	24
Q0080	2	3	14	0	1	2
Q0085	5	48	69	14	25	39
Q0092	0	1	3	0	0	1
Q0105	1	30	30	3	8	16
Q0110	1	27	44	4	18	28
Q0115	1	31	32	1	13	19
Q0120	4	27	36	4	12	23
Q0130	75	45	41	20	5	7
Q0140	5	34	33	6	16	20
Q0142	1	0	9	0	1	2
Q0143	0	3	3	0	0	1
Q0144	0	5	2	0	3	2
Q0160	5	23	42	16	11	16
Q0182	0	2	4	0	2	0
Q0250	2	23	33	6	13	27
Q0255	1	29	33	0	11	25
Q0275	4	37	56	4	19	24
Q0297	0	0	0	0	0	0
R0010W	546	856	1533	773	1037	1623
R0020C	359	550	800	621	608	892
R0030W	197	344	547	252	321	524
R0040C	305	474	799	531	554	826
RDN18-1	1194	462	867	174211	48537	84908
RDN18-2	1203	469	852	174739	48644	84751
RDN25-1	5710	697	1492	212125	27637	53495
RDN25-2	6940	960	1922	275781	34041	64989
RDN5-1	189	144	322	1060	110	199
RDN5-2	0	7	5	1	1	5
RDN5-3	0	0	0	0	0	0
RDN5-4	0	0	0	0	0	0
RDN5-5	0	0	0	0	0	0
RDN5-6	53	53	115	897	70	124
RDN58-1	5	7	5	22	5	7
RDN58-2	54	71	131	13235	980	1767
RNA170	1	4	2	9	3	7
RPM1	0	3	9	1	3	2
RPR1	11	1	3	20	1	10
RUF5-1	1087	2588	3464	1480	2459	3197
RUF5-2	1073	2584	3522	1512	2410	3160
SCR1	22	13	18	186	43	101
SRG1	52	99	150	49	94	126
TLC1	124	177	257	163	163	271
YAL001C	95	87	170	105	95	133
YAL002W	49	94	132	88	80	132
YAL003W	2238	2317	3906	2308	2299	3684
YAL004W	0	0	0	0	0	0
YAL005C	4055	2642	5627	4578	2285	4320
YAL007C	143	191	339	131	175	246
YAL008W	64	69	128	91	75	125
YAL009W	26	51	80	27	47	60
YAL010C	35	40	57	32	42	52
YAL011W	40	21	70	42	31	60
YAL012W	801	569	1015	931	664	1084
YAL013W	58	35	59	81	51	72
YAL014C	63	98	165	88	94	169
YAL015C	46	75	121	83	68	80
YAL016C-A	14	4	18	21	8	20
YAL016C-B	17	44	38	12	32	24
YAL016W	260	354	506	290	309	435
YAL017W	116	138	198	216	124	160
YAL018C	0	0	2	0	2	2
YAL019W	101	120	201	210	138	179
YAL019W-A	1	1	0	0	0	5
YAL020C	23	25	39	30	25	35
YAL021C	101	109	173	216	153	216
YAL022C	85	108	167	90	79	152
YAL023C	350	282	483	384	249	459
YAL024C	33	56	57	31	34	57
YAL025C	67	87	125	108	124	183
YAL026C	90	106	172	136	97	143
YAL026C-A	13	40	60	8	31	36
YAL027W	21	22	39	21	32	52
YAL028W	35	62	83	60	59	90
YAL029C	121	193	282	215	186	260
YAL030W	71	105	137	90	89	144
YAL031C	27	44	69	63	43	59
YAL031W-A	8	7	9	1	2	2
YAL032C	21	27	41	24	25	51
YAL033W	33	63	122	33	48	89
YAL034C	48	43	68	69	53	74
YAL034C-B	31	65	110	19	46	45
YAL034W-A	8	18	27	16	17	22
YAL035W	784	710	1173	1063	511	837
YAL036C	199	239	451	252	175	282
YAL037C-A	704	1662	2156	376	638	726
YAL037C-B	79	160	245	68	113	129
YAL037W	10	35	35	14	26	35
YAL038W	4887	2390	3927	6735	3162	5403
YAL039C	65	50	133	101	64	128
YAL040C	73	87	119	135	128	201
YAL041W	78	148	180	131	135	230
YAL042C-A	0	0	0	0	0	1
YAL042W	173	176	268	243	158	257
YAL043C	59	59	107	106	73	122
YAL044C	240	440	748	287	403	625
YAL044W-A	5	29	37	11	24	38
YAL045C	0	0	0	0	0	0
YAL046C	36	55	71	48	35	91
YAL047C	15	35	102	26	57	52
YAL047W-A	0	0	0	0	0	0
YAL048C	28	34	43	41	28	44
YAL049C	79	107	220	123	113	184
YAL051W	39	72	88	75	79	106
YAL053W	170	228	378	226	232	342
YAL054C	22	41	54	33	37	51
YAL055W	34	24	46	43	29	74
YAL056C-A	2	8	8	3	4	3
YAL056W	83	105	188	104	107	163
YAL058W	30	21	34	41	15	48
YAL059C-A	0	0	0	0	0	0
YAL059W	6	18	47	7	20	36
YAL060W	300	182	308	346	142	274
YAL061W	69	53	109	119	51	114
YAL062W	39	24	37	43	30	42
YAL063C	37	62	91	72	69	153
YAL063C-A	1	4	11	2	4	6
YAL064C-A	2	1	6	1	4	6
YAL064W	0	2	2	0	1	3
YAL064W-B	4	4	12	4	9	17
YAL065C	7	8	6	7	4	16
YAL066W	1	3	1	0	0	0
YAL067C	5	25	21	15	17	31
YAL067W-A	0	0	1	0	0	3
YAL068C	0	4	3	1	5	6
YAL068W-A	0	2	0	0	0	1
YAL069W	0	0	2	0	0	0
YAR002C-A	167	220	396	205	178	271
YAR002W	108	160	239	155	195	237
YAR003W	34	77	104	59	77	93
YAR007C	123	176	225	149	160	243
YAR008W	16	26	44	16	33	47
YAR009C	4387	6170	13154	6984	8579	17119
YAR010C	714	599	1424	2313	3420	7685
YAR014C	66	90	144	143	78	171
YAR015W	383	600	981	566	643	1092
YAR018C	31	55	89	28	52	63
YAR019C	24	38	50	44	49	70
YAR019W-A	1	0	1	0	0	3
YAR020C	4	1	4	1	4	6
YAR023C	5	13	24	7	15	19
YAR027W	126	175	248	164	201	278
YAR028W	72	99	150	91	108	154
YAR029W	2	7	8	4	4	6
YAR030C	12	8	19	9	16	18
YAR031W	47	69	103	71	72	107
YAR033W	35	57	85	44	49	71
YAR035C-A	0	1	4	1	1	2
YAR035W	7	5	15	10	9	15
YAR042W	114	72	116	211	105	193
YAR047C	2	1	4	2	5	5
YAR050W	32	44	75	68	67	136
YAR053W	2	9	8	3	8	17
YAR060C	0	4	7	1	0	2
YAR061W	3	3	7	1	2	3
YAR062W	8	0	7	5	7	15
YAR064W	2	2	6	4	2	9
YAR066W	15	14	15	22	14	35
YAR068W	28	31	43	55	42	60
YAR069C	0	2	2	2	0	1
YAR070C	1	4	6	1	1	10
YAR071W	603	860	1404	726	679	1114
YAR073W	116	111	211	123	105	183
YAR075W	41	53	97	30	44	66
YBL001C	103	223	365	156	177	316
YBL002W	334	593	1020	337	509	796
YBL003C	964	1799	3049	839	1425	2167
YBL004W	85	175	286	130	176	233
YBL005W	74	99	160	83	127	169
YBL005W-A	0	0	0	0	0	0
YBL005W-B	3359	4472	9583	5842	8252	16648
YBL006C	52	72	131	104	71	137
YBL006W-A	0	0	0	0	0	0
YBL007C	324	271	504	592	369	573
YBL008W	23	38	57	54	46	55
YBL008W-A	0	1	2	0	2	0
YBL009W	23	50	64	43	35	38
YBL010C	24	26	56	29	41	63
YBL011W	88	89	115	145	80	163
YBL012C	0	0	1	4	3	1
YBL013W	1	1	3	16	5	3
YBL014C	41	45	72	58	44	73
YBL015W	125	54	96	135	60	99
YBL016W	76	90	138	99	97	169
YBL017C	184	175	307	285	167	277
YBL018C	40	47	115	46	65	100
YBL019W	24	41	67	39	44	49
YBL020W	45	59	97	57	47	95
YBL021C	22	24	59	44	38	73
YBL022C	196	249	378	357	223	331
YBL023C	32	55	101	59	47	112
YBL024W	142	132	222	184	108	173
YBL025W	9	5	17	19	10	16
YBL026W	68	156	256	68	169	238
YBL027W	2143	3280	5666	2046	2651	4400
YBL028C	47	88	144	34	85	129
YBL029C-A	47	70	86	66	59	91
YBL029W	15	54	80	52	59	89
YBL030C	413	357	623	493	363	571
YBL031W	6	33	31	14	24	41
YBL032W	179	204	330	208	153	265
YBL033C	83	68	120	173	93	142
YBL034C	29	32	53	40	28	88
YBL035C	26	42	75	43	32	47
YBL036C	82	138	263	117	122	163
YBL037W	63	82	138	86	95	117
YBL038W	58	94	154	63	103	137
YBL039C	205	212	352	234	113	214
YBL039C-A	0	0	0	0	0	0
YBL039W-B	6	28	30	5	17	38
YBL040C	193	333	507	185	211	292
YBL041W	278	336	552	331	296	434
YBL042C	77	52	108	58	49	52
YBL043W	8	7	12	5	10	19
YBL044W	0	2	2	0	0	2
YBL045C	319	230	419	386	204	310
YBL046W	42	41	79	73	53	92
YBL047C	261	244	383	587	406	666
YBL048W	5	12	20	5	16	8
YBL049W	20	10	30	12	11	24
YBL050W	165	235	397	190	169	282
YBL051C	248	195	307	484	410	615
YBL052C	36	74	114	62	54	79
YBL053W	3	11	8	2	9	6
YBL054W	32	56	93	71	98	123
YBL055C	100	121	204	143	108	196
YBL056W	441	558	838	483	402	620
YBL057C	69	92	153	99	93	127
YBL058W	216	198	386	258	251	447
YBL059C-A	46	60	104	67	83	91
YBL059W	8	20	41	15	20	40
YBL060W	37	38	80	37	50	73
YBL061C	98	76	152	150	76	113
YBL062W	1	1	2	2	2	3
YBL063W	34	51	82	56	62	74
YBL064C	151	165	256	166	150	222
YBL065W	3	4	7	1	2	2
YBL066C	13	18	27	46	30	48
YBL067C	71	119	198	73	79	126
YBL068W	67	98	183	73	80	132
YBL068W-A	0	0	0	0	0	0
YBL069W	26	38	61	50	48	55
YBL070C	2	2	3	6	4	10
YBL071C	10	19	35	15	20	28
YBL071C-B	3	3	3	1	0	2
YBL071W-A	13	12	30	22	17	39
YBL072C	1857	2842	6439	1587	2183	4428
YBL073W	0	0	1	0	1	0
YBL074C	5	4	8	21	8	15
YBL075C	56	30	53	89	35	50
YBL076C	681	705	1227	905	504	802
YBL077W	49	145	216	45	77	103
YBL078C	39	54	106	72	56	73
YBL079W	94	154	237	160	149	225
YBL080C	19	38	77	32	36	65
YBL081W	24	25	47	95	103	179
YBL082C	22	21	37	29	25	45
YBL083C	5	11	11	2	4	7
YBL084C	35	51	103	45	54	74
YBL085W	74	97	165	147	121	196
YBL086C	47	92	136	91	83	133
YBL087C	721	1435	2579	748	962	1794
YBL088C	52	94	103	94	83	135
YBL089W	41	50	95	42	55	74
YBL090W	36	75	91	47	66	99
YBL091C	345	288	486	466	261	466
YBL091C-A	47	64	87	46	65	104
YBL092W	1692	2772	4352	1804	2301	3567
YBL093C	62	77	154	72	89	127
YBL094C	1	0	1	1	0	0
YBL095W	8	9	14	8	6	17
YBL096C	0	1	0	0	1	0
YBL097W	9	8	14	36	13	25
YBL098W	39	52	86	42	58	79
YBL099W	954	692	1094	858	454	664
YBL100C	17	6	21	28	12	14
YBL100W-A	0	0	0	0	0	0
YBL100W-B	1134	2003	4001	1466	1966	3460
YBL100W-C	2	0	1	1	1	6
YBL101C	80	82	113	145	109	151
YBL102W	92	109	193	77	69	105
YBL103C	48	58	108	69	65	109
YBL104C	37	49	72	74	45	94
YBL105C	72	100	157	206	149	202
YBL106C	17	31	47	31	34	42
YBL107C	47	73	124	38	100	122
YBL107W-A	0	4	20	2	9	6
YBL108C-A	1	1	3	1	3	7
YBL108W	0	1	1	0	2	0
YBL109W	2	5	8	2	6	22
YBL111C	47	47	117	78	73	134
YBL112C	15	18	40	27	18	22
YBL113C	99	102	251	121	125	265
YBL113W-A	0	0	0	0	0	0
YBR001C	63	57	90	97	67	101
YBR002C	39	47	78	69	81	104
YBR003W	82	123	197	91	102	137
YBR004C	51	90	148	47	81	129
YBR005W	80	70	144	103	96	152
YBR006W	92	127	193	128	103	184
YBR007C	34	55	86	75	84	98
YBR008C	26	54	88	43	38	68
YBR009C	284	718	1448	466	785	1400
YBR010W	441	770	1329	407	702	1146
YBR011C	855	822	1429	1387	1030	1634
YBR012C	15	37	75	18	49	63
YBR012W-A	0	0	0	0	0	0
YBR012W-B	3425	4732	10128	5813	8200	16480
YBR013C	18	51	57	13	23	36
YBR014C	64	100	206	76	127	164
YBR015C	95	118	181	159	122	203
YBR016W	122	99	194	132	141	246
YBR017C	204	192	275	274	192	265
YBR018C	9	8	27	11	15	21
YBR019C	13	14	25	23	18	32
YBR020W	7	14	16	10	10	9
YBR021W	12	15	17	17	12	25
YBR022W	39	82	120	64	59	106
YBR023C	63	120	206	125	102	171
YBR024W	70	84	144	75	53	94
YBR025C	841	1103	1750	1059	980	1419
YBR026C	184	197	358	199	163	247
YBR027C	7	21	29	9	10	8
YBR028C	30	63	96	62	44	72
YBR029C	65	90	127	80	75	133
YBR030W	43	52	84	45	49	85
YBR031W	3722	3403	6034	4265	3168	5547
YBR032W	0	3	7	3	4	5
YBR033W	11	22	41	29	29	36
YBR034C	155	255	435	197	261	368
YBR035C	167	189	310	184	148	241
YBR036C	228	201	350	284	210	359
YBR037C	40	49	81	42	42	64
YBR038W	39	75	100	55	50	89
YBR039W	260	330	509	278	316	476
YBR040W	22	26	40	59	25	35
YBR041W	92	124	211	132	117	181
YBR042C	58	136	171	73	69	140
YBR043C	49	53	82	63	64	107
YBR044C	42	45	74	74	48	80
YBR045C	5	12	19	14	13	14
YBR046C	60	79	125	83	70	88
YBR047W	19	45	64	28	36	64
YBR048W	2058	2420	3985	1949	2178	3642
YBR049C	55	68	132	103	70	140
YBR050C	15	12	26	22	16	25
YBR051W	0	2	2	3	1	2
YBR052C	220	226	399	292	209	320
YBR053C	110	131	240	189	159	217
YBR054W	512	528	929	634	603	979
YBR055C	39	71	99	59	45	74
YBR056C-B	0	0	0	0	0	0
YBR056W	236	246	427	312	234	357
YBR056W-A	2	11	20	16	15	20
YBR057C	63	67	147	59	68	97
YBR058C	124	156	250	158	164	299
YBR058C-A	58	153	223	109	103	186
YBR059C	97	103	190	251	139	238
YBR060C	51	81	127	104	84	146
YBR061C	56	71	114	59	72	104
YBR062C	63	118	186	82	120	170
YBR063C	19	38	49	20	32	45
YBR064W	0	0	0	0	0	0
YBR065C	15	20	24	35	17	26
YBR066C	14	32	62	18	19	39
YBR067C	538	549	953	964	900	1507
YBR068C	311	388	627	497	417	690
YBR069C	199	249	399	233	213	359
YBR070C	27	42	66	25	32	54
YBR071W	35	67	88	61	77	117
YBR072C-A	2	3	2	0	1	3
YBR072W	1268	189	291	1446	196	336
YBR073W	73	135	237	134	118	186
YBR074W	93	101	185	118	110	157
YBR076C-A	11	14	22	12	16	26
YBR076W	9	27	32	19	17	27
YBR077C	39	39	69	51	44	53
YBR078W	1103	1324	2254	1056	1177	1898
YBR079C	287	300	443	439	327	470
YBR080C	165	186	260	210	195	251
YBR081C	84	75	128	166	91	151
YBR082C	559	595	1120	927	830	1208
YBR083W	38	34	62	60	61	80
YBR084C-A	1857	2790	4859	1775	2098	3432
YBR084W	285	313	502	377	210	376
YBR085C-A	140	136	204	189	165	244
YBR085W	31	38	83	29	27	79
YBR086C	191	210	317	401	291	420
YBR087W	80	142	269	109	112	208
YBR088C	22	41	70	16	26	44
YBR089C-A	55	71	88	52	73	120
YBR089W	0	0	0	0	0	0
YBR090C	3	3	12	3	4	6
YBR091C	13	34	54	24	48	49
YBR092C	189	295	495	224	240	455
YBR093C	193	289	610	235	309	469
YBR094W	70	98	168	92	88	147
YBR095C	48	58	86	52	65	87
YBR096W	96	187	299	110	121	171
YBR097W	58	75	118	74	69	89
YBR098W	18	20	41	27	28	32
YBR099C	0	0	0	0	0	0
YBR101C	931	979	1611	1195	1066	1527
YBR102C	49	66	121	88	74	104
YBR103C-A	0	0	2	0	1	4
YBR103W	59	70	112	73	54	106
YBR104W	46	99	168	50	95	123
YBR105C	58	69	131	104	108	192
YBR106W	470	713	1236	629	507	915
YBR107C	16	23	42	28	28	40
YBR108W	69	38	88	146	81	116
YBR109C	266	296	526	318	383	608
YBR109W-A	3	3	8	8	3	6
YBR110W	65	150	206	77	100	160
YBR111C	330	442	737	533	429	647
YBR111W-A	30	77	105	47	98	113
YBR112C	118	138	211	324	283	532
YBR113W	2	7	8	14	14	23
YBR114W	68	98	106	109	64	100
YBR115C	151	196	300	269	175	299
YBR116C	2	1	1	0	5	6
YBR117C	8	12	16	12	13	17
YBR118W	8971	8843	20836	8178	7325	16791
YBR119W	29	53	93	37	62	103
YBR120C	31	54	73	34	46	70
YBR121C	766	881	1408	845	555	892
YBR121C-A	0	0	0	0	0	0
YBR122C	74	109	171	71	87	146
YBR123C	44	85	132	55	57	89
YBR124W	1	0	3	2	1	0
YBR125C	40	61	121	68	57	91
YBR126C	774	563	912	1061	606	1058
YBR126W-A	55	49	91	145	82	171
YBR126W-B	22	21	35	18	15	46
YBR127C	923	677	1199	1142	500	782
YBR128C	18	25	48	28	26	46
YBR129C	35	94	167	49	93	130
YBR130C	63	92	119	78	66	110
YBR131C-A	0	0	0	0	0	0
YBR131W	42	40	71	43	35	37
YBR132C	50	14	30	47	32	48
YBR133C	50	78	136	89	72	89
YBR134W	2	1	1	1	1	4
YBR135W	33	38	55	44	58	109
YBR136W	28	50	71	56	57	77
YBR137W	60	83	126	72	76	113
YBR138C	6	28	43	13	24	33
YBR139W	139	132	202	214	124	187
YBR140C	138	136	210	260	215	276
YBR141C	16	24	37	25	30	33
YBR141W-A	0	0	0	0	0	0
YBR142W	118	167	261	139	144	188
YBR143C	337	593	983	622	558	748
YBR144C	0	1	2	0	2	2
YBR145W	220	189	328	253	210	325
YBR146W	99	126	200	125	124	216
YBR147W	18	18	40	18	15	32
YBR148W	4	14	15	10	11	17
YBR149W	435	380	687	535	455	644
YBR150C	48	82	132	54	61	85
YBR151W	159	247	371	252	201	319
YBR152W	4	12	19	15	15	22
YBR153W	24	73	63	32	47	76
YBR154C	139	302	468	143	238	306
YBR155W	47	95	157	74	83	131
YBR156C	11	17	37	20	37	36
YBR157C	25	34	82	34	31	54
YBR158W	158	403	658	221	388	616
YBR159W	240	402	624	273	234	378
YBR160W	54	88	144	55	72	107
YBR161W	28	59	66	38	58	81
YBR162C	928	870	1647	850	654	1094
YBR162W-A	113	290	446	152	271	402
YBR163W	40	69	109	40	62	75
YBR164C	74	144	277	110	134	236
YBR165W	41	50	82	41	42	73
YBR166C	97	183	246	120	133	217
YBR167C	13	53	77	33	46	52
YBR168W	13	27	46	21	29	42
YBR169C	573	420	672	907	411	645
YBR170C	92	112	188	149	110	188
YBR171W	94	175	315	70	158	216
YBR172C	99	126	203	155	150	218
YBR173C	93	126	192	161	179	303
YBR174C	0	0	1	0	0	0
YBR175W	32	48	66	39	45	76
YBR176W	28	43	106	34	56	73
YBR177C	144	117	187	213	115	176
YBR178W	1	3	2	2	0	0
YBR179C	43	58	91	62	61	87
YBR180W	2	14	12	7	3	14
YBR181C	1390	2753	6476	1222	1833	3768
YBR182C	14	22	17	10	11	17
YBR182C-A	2	1	1	1	1	2
YBR183W	97	60	80	79	65	90
YBR184W	4	12	21	7	8	11
YBR185C	42	70	116	50	71	97
YBR186W	9	17	27	14	23	35
YBR187W	136	151	344	145	156	258
YBR188C	12	18	23	30	23	37
YBR189W	1372	2034	3619	1338	1774	3198
YBR190W	3	7	7	8	8	4
YBR191W	1013	1702	3470	1037	1225	2458
YBR191W-A	86	348	503	56	156	183
YBR192W	37	42	74	48	43	71
YBR193C	32	38	63	65	56	50
YBR194W	18	29	40	21	23	35
YBR195C	30	55	70	24	46	83
YBR196C	3698	3301	5601	4221	3107	5091
YBR196C-A	1	4	2	0	4	2
YBR196C-B	3	3	9	4	9	8
YBR197C	22	20	41	23	18	37
YBR198C	88	88	151	148	95	172
YBR199W	194	300	512	268	243	333
YBR200W	68	95	146	111	95	142
YBR200W-A	0	0	0	0	0	0
YBR201C-A	7	12	15	10	8	16
YBR201W	51	73	117	49	66	83
YBR202W	39	57	100	67	53	76
YBR203W	32	34	63	47	46	77
YBR204C	70	104	155	81	80	152
YBR205W	118	139	251	161	121	197
YBR206W	18	31	57	23	29	37
YBR207W	93	171	226	134	166	260
YBR208C	100	110	170	170	82	142
YBR209W	1	1	4	2	4	8
YBR210W	28	68	119	44	75	108
YBR211C	39	67	111	42	77	84
YBR212W	105	100	194	158	124	233
YBR213W	12	23	29	18	18	26
YBR214W	238	183	287	385	268	510
YBR215W	50	52	83	85	86	137
YBR216C	60	68	100	87	77	103
YBR217W	19	41	48	24	33	59
YBR218C	350	306	516	523	320	540
YBR219C	0	0	1	1	0	1
YBR220C	43	48	69	52	31	58
YBR221C	559	590	1066	576	467	661
YBR221W-A	16	40	64	13	24	31
YBR222C	147	114	191	211	143	220
YBR223C	19	16	17	18	14	26
YBR223W-A	0	0	0	0	0	0
YBR224W	1	0	2	3	1	3
YBR225W	42	19	43	49	41	54
YBR226C	3	11	17	4	9	8
YBR227C	56	66	147	80	80	114
YBR228W	29	45	44	30	24	42
YBR229C	120	119	182	178	112	149
YBR230C	70	96	144	111	141	195
YBR230W-A	33	14	41	40	30	71
YBR231C	15	12	22	17	18	29
YBR232C	0	0	2	2	2	1
YBR233W	26	43	64	27	42	56
YBR233W-A	11	26	33	19	25	35
YBR234C	238	216	314	359	207	369
YBR235W	67	76	118	98	81	124
YBR236C	75	133	198	109	119	165
YBR237W	36	59	84	45	57	93
YBR238C	40	53	95	89	112	156
YBR239C	27	19	48	34	27	51
YBR240C	6	2	11	4	12	15
YBR241C	55	31	74	62	27	51
YBR242W	35	71	118	48	69	97
YBR243C	54	64	123	61	61	84
YBR244W	121	329	517	116	238	344
YBR245C	80	102	131	152	108	165
YBR246W	93	113	174	123	115	184
YBR247C	35	67	109	65	56	93
YBR248C	166	253	411	226	181	342
YBR249C	621	633	1030	622	550	873
YBR250W	6	13	18	7	5	10
YBR251W	57	55	89	50	57	100
YBR252W	71	97	170	68	78	158
YBR253W	29	43	69	46	32	54
YBR254C	30	36	44	42	40	49
YBR255C-A	12	61	66	28	44	70
YBR255W	46	67	107	62	62	94
YBR256C	226	396	564	247	304	433
YBR257W	30	41	76	41	38	63
YBR258C	15	25	56	34	32	41
YBR259W	23	58	63	46	41	97
YBR260C	48	78	127	98	71	135
YBR261C	75	95	144	119	77	162
YBR262C	37	59	90	54	89	104
YBR263W	282	226	314	315	186	293
YBR264C	35	55	75	34	35	58
YBR265W	44	76	115	68	73	124
YBR266C	0	0	0	0	0	0
YBR267W	21	30	48	24	48	85
YBR268W	34	67	144	49	101	133
YBR269C	23	35	56	23	21	57
YBR270C	16	37	40	35	29	42
YBR271W	28	55	62	52	32	63
YBR272C	71	59	118	87	65	100
YBR273C	144	135	184	170	115	200
YBR274W	59	96	137	74	65	88
YBR275C	39	58	80	91	64	89
YBR276C	117	183	357	159	137	217
YBR277C	0	0	0	0	0	0
YBR278W	13	21	51	25	33	35
YBR279W	125	143	224	179	172	232
YBR280C	58	55	87	87	51	81
YBR281C	84	134	161	153	139	210
YBR282W	31	78	136	64	90	134
YBR283C	513	524	875	475	323	538
YBR284W	11	18	18	10	19	16
YBR285W	3	8	14	4	4	6
YBR286W	1344	892	1447	1797	799	1350
YBR287W	237	200	294	230	161	240
YBR288C	78	134	222	95	104	133
YBR289W	77	50	78	119	129	238
YBR290W	73	132	219	145	152	218
YBR291C	28	37	62	38	44	62
YBR292C	2	11	11	3	6	10
YBR293W	32	82	129	43	78	117
YBR294W	14	23	43	18	35	63
YBR295W	47	44	72	54	45	54
YBR296C	46	40	77	59	52	62
YBR296C-A	0	0	1	0	1	1
YBR297W	23	29	32	22	26	30
YBR298C	32	29	32	41	27	48
YBR298C-A	0	0	0	0	0	0
YBR299W	5	7	22	1	5	12
YBR300C	1	1	2	0	1	6
YBR301W	2	5	11	1	0	4
YBR302C	92	167	326	123	139	265
YCL001W	125	210	331	145	225	279
YCL001W-A	1	5	9	3	2	6
YCL001W-B	0	2	6	1	5	3
YCL002C	45	72	144	48	84	113
YCL004W	26	44	72	39	39	63
YCL005W	32	54	98	46	67	121
YCL005W-A	26	37	65	18	43	57
YCL007C	0	1	4	2	1	4
YCL008C	56	65	81	105	86	135
YCL009C	521	404	732	816	450	833
YCL010C	31	18	25	52	22	53
YCL011C	243	333	563	369	289	510
YCL012C	26	36	68	25	31	52
YCL014W	36	44	76	47	41	75
YCL016C	20	25	52	30	25	40
YCL017C	176	157	280	172	140	210
YCL018W	0	0	0	0	0	0
YCL019W	1296	2203	4397	1690	2228	3951
YCL020W	0	0	0	0	0	0
YCL021W-A	10	5	22	12	12	16
YCL022C	0	0	0	0	0	0
YCL023C	0	0	3	3	3	1
YCL024W	23	24	46	31	21	22
YCL025C	136	113	203	152	134	171
YCL026C-A	2	6	4	0	2	6
YCL026C-B	10	10	23	17	15	21
YCL027W	26	30	38	37	29	58
YCL028W	233	152	256	312	185	278
YCL029C	33	26	56	45	64	72
YCL030C	689	755	1397	869	768	1251
YCL031C	96	215	338	162	286	365
YCL032W	43	43	62	66	62	83
YCL033C	80	57	110	79	77	140
YCL034W	92	89	166	104	125	188
YCL035C	245	312	542	393	387	575
YCL036W	15	28	45	19	17	41
YCL037C	94	10	14	191	162	282
YCL038C	50	58	103	64	32	59
YCL039W	52	67	108	87	83	130
YCL040W	1979	813	1370	2306	899	1433
YCL041C	6	4	2	2	2	6
YCL042W	4	1	2	13	3	3
YCL043C	1031	886	1544	1197	824	1499
YCL044C	17	33	51	41	59	80
YCL045C	153	219	309	264	225	376
YCL046W	0	1	1	3	2	1
YCL047C	33	65	116	38	58	75
YCL048W	6	6	16	6	8	17
YCL048W-A	0	0	4	1	0	7
YCL049C	71	90	135	84	85	150
YCL050C	458	515	764	555	552	790
YCL051W	53	71	67	67	55	91
YCL052C	106	170	248	176	166	222
YCL054W	140	161	281	174	150	231
YCL055W	31	49	99	45	59	77
YCL056C	33	81	125	44	67	89
YCL057C-A	132	176	356	244	187	302
YCL057W	204	246	388	316	228	301
YCL058C	8	13	22	5	10	17
YCL058W-A	0	0	0	0	0	0
YCL059C	161	314	507	216	233	360
YCL061C	57	70	97	113	51	82
YCL063W	22	38	56	39	49	59
YCL064C	350	545	889	421	426	647
YCL065W	4	29	50	10	23	29
YCL066W	0	0	0	1	0	0
YCL067C	33	66	137	43	84	128
YCL068C	3	3	13	7	11	22
YCL069W	3	7	16	1	6	15
YCL073C	2	7	15	2	5	10
YCL074W	0	1	4	2	3	2
YCL075W	0	1	1	0	1	3
YCL076W	0	0	2	0	2	2
YCR001W	6	6	13	1	7	6
YCR002C	132	205	362	169	202	328
YCR003W	39	99	139	49	60	112
YCR004C	283	268	433	287	219	331
YCR005C	338	585	920	442	603	923
YCR006C	0	3	4	2	6	6
YCR007C	15	38	45	22	34	35
YCR008W	151	155	238	160	113	163
YCR009C	216	315	556	339	347	465
YCR010C	3	8	6	3	9	10
YCR011C	211	228	318	332	193	264
YCR012W	5980	2910	4922	6686	3025	4926
YCR013C	683	770	1251	503	590	756
YCR014C	19	25	48	27	31	42
YCR015C	17	26	45	41	30	37
YCR016W	63	130	175	111	93	138
YCR017C	208	195	268	306	161	240
YCR018C	45	53	104	39	84	123
YCR018C-A	1	2	6	3	1	6
YCR019W	21	16	39	27	24	42
YCR020C	11	18	22	12	8	30
YCR020C-A	24	53	101	39	66	86
YCR020W-B	11	23	39	12	27	27
YCR021C	1060	690	1190	1101	728	1221
YCR022C	0	1	1	1	1	3
YCR023C	96	117	210	110	95	168
YCR024C	14	30	47	27	31	51
YCR024C-A	112	144	250	118	108	233
YCR024C-B	240	386	651	173	274	383
YCR025C	1	6	3	1	1	4
YCR026C	67	62	120	106	88	113
YCR027C	14	34	40	22	22	32
YCR028C	32	59	85	47	48	59
YCR028C-A	111	233	366	133	201	270
YCR030C	71	80	120	184	115	210
YCR031C	895	1227	2184	1017	872	1670
YCR032W	49	85	107	86	76	98
YCR033W	99	66	119	167	82	157
YCR034W	112	261	443	185	201	289
YCR035C	82	140	239	114	120	227
YCR036W	78	116	206	104	104	155
YCR037C	75	67	102	104	91	162
YCR038C	20	40	82	35	33	73
YCR038W-A	0	0	0	0	0	0
YCR039C	37	69	125	44	90	126
YCR040W	0	0	1	0	0	1
YCR041W	7	28	39	11	20	14
YCR042C	76	132	152	146	121	147
YCR043C	53	71	135	54	71	126
YCR044C	84	94	157	68	69	100
YCR045C	18	23	37	22	21	38
YCR045W-A	0	0	0	0	0	0
YCR046C	43	41	98	51	70	107
YCR047C	25	21	43	28	46	53
YCR047W-A	0	0	0	0	0	0
YCR048W	58	44	51	68	34	66
YCR049C	0	0	0	0	0	0
YCR050C	3	2	2	1	0	4
YCR051W	80	69	131	113	73	154
YCR052W	88	105	161	142	135	221
YCR053W	573	867	1448	656	662	1039
YCR054C	25	40	69	38	36	44
YCR057C	107	152	239	144	119	208
YCR059C	98	97	199	100	68	140
YCR060W	44	43	96	62	44	98
YCR061W	83	34	58	118	69	146
YCR063W	5	1	3	6	3	5
YCR064C	0	0	4	0	1	1
YCR065W	21	4	19	46	21	36
YCR066W	18	24	51	16	28	59
YCR067C	93	100	161	193	162	226
YCR068W	28	5	18	50	15	30
YCR069W	131	179	317	171	194	321
YCR071C	37	57	120	43	76	102
YCR072C	37	44	62	52	43	68
YCR073C	48	58	85	60	79	118
YCR073W-A	114	93	176	132	90	150
YCR075C	23	23	56	18	34	52
YCR075W-A	17	40	83	44	55	80
YCR076C	35	37	58	52	37	62
YCR077C	190	219	374	191	193	348
YCR079W	34	34	38	59	48	77
YCR081C-A	0	0	0	0	0	0
YCR081W	20	26	47	42	38	66
YCR082W	63	151	239	93	105	173
YCR083W	44	68	112	51	51	76
YCR084C	169	114	221	352	271	460
YCR085W	0	5	7	0	2	6
YCR086W	5	15	18	20	13	27
YCR087C-A	0	0	0	0	0	0
YCR087W	2	3	0	1	1	4
YCR088W	227	191	293	388	178	297
YCR089W	32	48	77	95	85	170
YCR090C	109	209	384	124	181	285
YCR091W	34	38	44	75	47	59
YCR092C	27	47	73	59	47	77
YCR093W	114	171	266	271	268	419
YCR094W	34	38	92	66	30	67
YCR095C	44	70	102	52	63	86
YCR095W-A	0	1	3	3	4	2
YCR096C	28	56	121	28	57	92
YCR097W	47	164	257	60	116	177
YCR097W-A	0	4	7	2	2	5
YCR098C	12	8	23	8	19	21
YCR099C	2	9	11	2	6	10
YCR100C	6	6	18	7	10	10
YCR101C	2	4	1	4	3	2
YCR102C	6	13	25	10	8	20
YCR102W-A	1	0	0	0	0	0
YCR104W	2	2	5	1	6	4
YCR105W	4	15	26	13	20	30
YCR106W	5	16	31	17	22	29
YCR107W	8	11	44	11	22	40
YCR108C	1	2	2	0	1	1
YDL001W	34	42	79	48	58	84
YDL002C	34	41	57	27	40	57
YDL003W	51	97	171	72	64	106
YDL004W	149	174	275	245	190	270
YDL005C	64	90	168	125	141	181
YDL006W	52	72	128	55	79	96
YDL007C-A	0	0	2	0	0	1
YDL007W	380	584	1044	479	501	710
YDL008W	55	59	110	55	85	139
YDL009C	14	34	49	32	28	45
YDL010W	22	31	43	24	34	55
YDL011C	0	0	0	0	0	0
YDL012C	47	81	116	150	134	252
YDL013W	44	47	100	82	53	85
YDL014W	496	696	1200	641	760	1212
YDL015C	217	300	470	234	232	355
YDL016C	50	101	112	30	75	94
YDL017W	30	26	52	41	26	36
YDL018C	41	44	103	34	35	83
YDL019C	226	195	293	287	144	260
YDL020C	153	254	388	227	258	384
YDL021W	98	95	148	134	91	149
YDL022C-A	0	0	0	0	0	0
YDL022W	460	404	695	562	452	709
YDL023C	2	3	5	7	8	4
YDL024C	5	17	14	4	9	9
YDL025C	89	75	164	168	93	166
YDL025W-A	0	0	0	0	0	0
YDL026W	0	0	1	0	1	2
YDL027C	48	91	144	66	84	126
YDL028C	33	51	86	52	43	74
YDL029W	421	591	932	475	437	734
YDL030W	35	56	76	44	44	63
YDL031W	141	170	268	151	103	188
YDL032W	0	0	0	1	0	0
YDL033C	9	20	39	21	20	29
YDL034W	1	0	2	1	1	0
YDL035C	49	87	142	152	106	192
YDL036C	49	47	67	53	31	61
YDL037C	65	17	47	419	225	344
YDL038C	151	128	220	328	273	462
YDL039C	31	40	86	72	87	152
YDL040C	213	234	396	304	172	305
YDL041W	0	0	0	1	1	1
YDL042C	19	30	50	26	21	39
YDL043C	23	63	96	30	46	78
YDL044C	26	41	62	26	32	56
YDL045C	48	74	141	62	74	142
YDL045W-A	30	82	120	61	66	112
YDL046W	105	142	228	170	144	208
YDL047W	115	106	175	118	106	156
YDL048C	103	196	349	276	376	604
YDL049C	8	8	15	6	6	13
YDL050C	54	124	170	45	80	90
YDL051W	110	153	260	112	138	167
YDL052C	89	134	218	130	128	189
YDL053C	72	132	199	76	86	125
YDL054C	41	56	99	76	52	96
YDL055C	2704	2941	4843	2088	1803	2996
YDL056W	32	65	124	61	67	141
YDL057W	28	40	62	40	31	44
YDL058W	152	124	196	301	129	198
YDL059C	36	68	96	36	44	55
YDL060W	88	135	246	144	135	220
YDL061C	353	653	1261	383	729	1276
YDL062W	2	1	6	6	5	0
YDL063C	61	82	143	58	93	91
YDL064W	62	91	166	70	63	120
YDL065C	84	141	250	102	114	155
YDL066W	335	189	288	344	153	257
YDL067C	93	89	163	136	97	184
YDL068W	1	0	3	0	1	3
YDL069C	14	38	47	8	30	33
YDL070W	289	376	593	353	362	486
YDL071C	2	5	2	4	4	4
YDL072C	255	320	467	258	288	422
YDL073W	50	127	202	80	121	183
YDL074C	113	149	262	112	168	223
YDL075W	1050	1726	2952	1096	1639	2712
YDL076C	45	73	159	78	95	130
YDL077C	57	84	130	95	73	105
YDL078C	243	288	483	280	244	359
YDL079C	35	36	52	46	33	52
YDL080C	62	70	89	55	62	98
YDL081C	1194	1208	2033	1361	1157	2023
YDL082W	1650	2640	4421	1510	2178	3500
YDL083C	1402	2317	4107	1500	2033	3371
YDL084W	882	1420	2271	876	943	1469
YDL085C-A	16	15	33	37	30	57
YDL085W	6	7	8	9	8	9
YDL086C-A	0	0	0	0	0	0
YDL086W	65	87	156	105	73	115
YDL087C	16	9	14	18	12	14
YDL088C	70	75	120	95	96	161
YDL089W	54	64	93	43	59	86
YDL090C	39	66	95	43	51	72
YDL091C	35	61	94	57	81	90
YDL092W	79	156	259	124	142	229
YDL093W	55	64	91	62	35	70
YDL094C	10	31	42	5	10	15
YDL095W	358	330	565	437	236	390
YDL096C	1	0	0	3	0	0
YDL097C	374	492	815	511	487	727
YDL098C	8	25	44	17	22	42
YDL099W	102	163	316	140	163	235
YDL100C	530	643	1159	647	499	742
YDL101C	28	34	67	30	42	61
YDL102W	34	61	87	42	40	71
YDL103C	81	126	240	134	93	151
YDL104C	25	43	57	37	30	55
YDL105W	12	11	15	13	11	13
YDL106C	31	43	79	83	79	106
YDL107W	15	46	54	35	27	45
YDL108W	42	68	85	48	53	95
YDL109C	12	9	19	28	24	32
YDL110C	115	104	150	164	118	231
YDL111C	72	109	186	85	110	142
YDL112W	117	150	221	161	153	203
YDL113C	69	104	148	95	77	138
YDL114W	0	4	7	0	4	3
YDL114W-A	1	0	0	0	0	3
YDL115C	40	66	122	85	65	136
YDL116W	82	127	205	135	117	155
YDL117W	26	60	95	61	65	71
YDL118W	0	2	1	2	1	2
YDL119C	19	32	44	27	23	30
YDL120W	71	91	142	52	78	163
YDL121C	78	140	244	84	133	216
YDL122W	110	195	298	181	185	273
YDL123W	22	24	43	44	59	84
YDL124W	622	687	1128	936	822	1181
YDL125C	168	329	534	196	289	450
YDL126C	1562	1331	2160	2222	1173	1848
YDL127W	20	23	41	23	25	47
YDL128W	97	147	206	145	107	205
YDL129W	8	16	29	24	31	36
YDL130W	873	1235	2217	1108	1314	2293
YDL130W-A	83	114	220	141	130	247
YDL131W	229	277	518	310	277	469
YDL132W	174	158	286	244	182	274
YDL133C-A	1596	1983	4026	2377	2202	3760
YDL133W	32	40	87	37	42	66
YDL134C	243	289	472	226	225	343
YDL135C	61	124	208	106	107	155
YDL136W	1073	1973	3864	1079	1936	3374
YDL137W	432	692	1236	443	588	921
YDL138W	39	34	59	52	42	92
YDL139C	9	10	9	18	18	31
YDL140C	202	185	312	589	544	883
YDL141W	41	63	90	75	68	96
YDL142C	32	48	75	37	34	54
YDL143W	523	575	888	484	478	714
YDL144C	46	43	75	77	36	63
YDL145C	496	483	789	774	497	777
YDL146W	65	84	157	74	91	143
YDL147W	309	536	825	454	451	660
YDL148C	117	113	252	189	118	225
YDL149W	31	43	61	55	50	52
YDL150W	31	48	69	43	47	53
YDL151C	2	1	1	1	3	3
YDL152W	1	0	1	0	1	3
YDL153C	171	283	434	207	210	369
YDL154W	18	36	45	21	31	51
YDL155W	49	76	135	73	93	120
YDL156W	21	13	13	17	20	22
YDL157C	73	104	193	71	88	119
YDL158C	24	72	106	20	29	39
YDL159C-B	0	0	0	0	0	0
YDL159W	27	27	70	51	58	50
YDL159W-A	3	0	1	7	4	8
YDL160C	199	25	27	329	176	231
YDL160C-A	17	30	61	29	34	46
YDL161W	104	143	235	213	206	333
YDL162C	0	0	0	0	0	1
YDL163W	0	0	0	0	0	0
YDL164C	44	84	117	58	47	75
YDL165W	69	104	160	71	67	133
YDL166C	65	101	149	67	110	146
YDL167C	102	172	207	145	144	222
YDL168W	121	204	322	172	164	243
YDL169C	12	15	18	14	12	12
YDL170W	35	54	78	44	45	92
YDL171C	207	189	368	314	224	341
YDL172C	0	4	4	0	0	3
YDL173W	59	49	69	68	57	108
YDL174C	153	113	195	197	110	208
YDL175C	29	45	77	39	43	87
YDL176W	38	51	92	42	50	80
YDL177C	16	43	71	29	49	83
YDL178W	117	173	275	143	133	180
YDL179W	17	23	44	26	27	42
YDL180W	75	87	177	70	83	137
YDL181W	40	20	37	57	27	59
YDL182W	251	314	587	338	310	513
YDL183C	13	19	27	19	14	24
YDL184C	1414	1828	3685	2079	1888	3156
YDL185C-A	19	12	9	53	15	17
YDL185W	1341	1294	1957	1704	854	1367
YDL186W	4	6	12	10	11	13
YDL187C	0	1	0	0	0	1
YDL188C	162	152	276	133	129	206
YDL189W	52	107	147	104	91	134
YDL190C	155	197	312	198	195	286
YDL191W	1157	2274	4194	1116	2114	3616
YDL192W	766	1428	2407	744	1036	1615
YDL193W	74	111	147	84	68	124
YDL194W	44	36	49	50	21	62
YDL195W	228	179	277	661	507	811
YDL196W	2	3	7	1	3	4
YDL197C	35	24	50	55	47	77
YDL198C	127	183	304	128	180	284
YDL199C	18	27	36	31	15	43
YDL200C	10	29	35	17	18	29
YDL201W	50	89	153	73	90	127
YDL202W	47	50	80	46	35	61
YDL203C	49	48	74	68	43	89
YDL204W	77	24	55	205	61	75
YDL205C	27	8	13	66	36	51
YDL206W	27	80	93	41	62	91
YDL207W	58	77	121	78	65	124
YDL208W	324	503	877	283	392	644
YDL209C	16	27	46	22	16	37
YDL210W	5	6	17	12	12	24
YDL211C	5	13	26	8	20	27
YDL212W	194	242	405	184	226	340
YDL213C	100	146	310	175	180	233
YDL214C	8	15	11	9	17	20
YDL215C	89	136	231	109	141	213
YDL216C	25	37	58	39	42	59
YDL217C	25	25	58	40	31	70
YDL218W	8	6	10	4	3	9
YDL219W	41	60	99	54	47	72
YDL220C	7	14	13	21	19	27
YDL221W	6	2	5	8	5	3
YDL222C	5	5	2	7	5	7
YDL223C	27	17	43	50	40	64
YDL224C	49	66	106	96	80	121
YDL225W	95	147	236	159	140	260
YDL226C	105	118	226	138	143	207
YDL227C	7	33	49	21	26	37
YDL228C	63	185	263	25	95	122
YDL229W	1033	1350	3002	1042	1013	1993
YDL230W	50	56	80	56	38	89
YDL231C	41	60	139	85	98	137
YDL232W	37	71	105	48	79	134
YDL233W	36	38	80	45	33	74
YDL234C	198	194	269	312	217	336
YDL235C	66	104	166	46	94	151
YDL236W	184	241	405	212	227	315
YDL237W	95	105	171	116	71	104
YDL238C	41	30	38	50	30	54
YDL239C	28	46	105	34	48	68
YDL240C-A	0	0	1	0	1	1
YDL240W	21	36	69	21	34	65
YDL241W	24	20	50	16	30	45
YDL242W	1	4	7	3	6	5
YDL243C	14	19	41	21	24	34
YDL244W	3	1	11	6	5	14
YDL245C	6	4	14	9	12	19
YDL246C	6	12	16	4	7	18
YDL247W	4	9	25	10	11	27
YDL247W-A	1	0	4	0	2	3
YDL248W	36	57	123	53	72	120
YDR001C	406	306	494	568	284	400
YDR002W	871	1106	1853	824	829	1293
YDR003W	43	53	88	57	46	67
YDR003W-A	14	21	31	17	12	32
YDR004W	34	60	106	52	56	83
YDR005C	61	136	176	89	110	176
YDR006C	115	140	213	165	196	296
YDR007W	28	47	81	53	28	67
YDR008C	15	21	41	11	25	30
YDR009W	5	14	15	10	5	10
YDR010C	1	2	3	2	2	2
YDR011W	282	520	758	467	533	755
YDR012W	937	1070	2663	998	977	2334
YDR013W	21	54	76	56	45	94
YDR014W	13	41	51	28	36	53
YDR014W-A	0	1	2	0	2	0
YDR015C	0	0	0	0	0	0
YDR016C	33	81	118	37	67	111
YDR017C	77	139	189	138	145	208
YDR018C	5	10	18	5	11	10
YDR019C	205	271	425	275	285	467
YDR020C	16	20	35	29	23	37
YDR021W	26	63	77	26	61	61
YDR022C	18	28	62	37	42	57
YDR023W	724	838	1382	694	670	969
YDR024W	23	65	84	20	19	31
YDR025W	799	1258	2454	754	1069	2033
YDR026C	45	62	112	68	73	117
YDR027C	72	111	147	106	94	143
YDR028C	212	192	323	370	195	329
YDR029W	7	11	23	13	8	20
YDR030C	11	23	28	19	25	52
YDR031W	40	73	110	36	48	95
YDR032C	294	343	472	356	294	459
YDR033W	717	1122	1718	743	1018	1609
YDR034C	64	124	180	94	99	188
YDR034C-A	2	3	5	1	1	6
YDR034C-C	0	0	0	0	0	0
YDR034C-D	1231	2127	4229	1576	2104	3783
YDR034W-B	19	31	50	31	23	48
YDR035W	352	385	682	442	402	635
YDR036C	73	80	144	105	94	149
YDR037W	1131	1449	2443	1252	1172	1899
YDR038C	92	93	225	122	134	194
YDR039C	83	108	249	142	153	206
YDR040C	78	113	248	141	147	217
YDR041W	57	106	186	86	89	158
YDR042C	4	1	5	1	2	1
YDR043C	20	15	38	27	23	27
YDR044W	157	168	290	198	152	226
YDR045C	31	69	132	42	68	117
YDR046C	253	400	682	367	351	627
YDR047W	149	185	287	165	114	212
YDR048C	1	2	1	2	1	1
YDR049W	34	63	93	62	50	82
YDR050C	6517	7340	12414	6441	7007	11825
YDR051C	71	130	221	131	103	137
YDR052C	51	55	101	67	64	106
YDR053W	0	0	1	1	1	1
YDR054C	134	113	182	174	153	236
YDR055W	214	261	441	269	309	470
YDR056C	90	162	222	112	165	237
YDR057W	39	62	85	56	64	102
YDR058C	19	35	59	44	25	46
YDR059C	23	44	64	35	57	68
YDR060W	186	283	400	294	269	382
YDR061W	57	90	152	70	73	110
YDR062W	349	293	530	406	261	376
YDR063W	50	90	162	88	90	128
YDR064W	1700	1812	2979	1467	1831	2924
YDR065W	18	16	24	32	27	29
YDR066C	21	57	52	29	37	42
YDR067C	61	169	173	77	161	220
YDR068W	71	107	170	112	114	177
YDR069C	37	51	88	81	73	87
YDR070C	32	31	29	36	19	30
YDR071C	317	615	968	327	491	761
YDR072C	103	145	262	131	137	209
YDR073W	37	54	107	48	71	124
YDR074W	725	516	849	1026	506	811
YDR075W	26	33	47	29	48	54
YDR076W	13	20	28	8	18	23
YDR077W	1557	1611	3009	4472	6165	11142
YDR078C	12	34	65	17	34	43
YDR079C-A	27	70	97	44	49	63
YDR079W	23	43	87	39	53	60
YDR080W	98	107	182	124	67	118
YDR081C	60	94	120	99	109	162
YDR082W	22	44	54	35	48	71
YDR083W	44	118	228	76	100	139
YDR084C	64	77	119	69	73	89
YDR085C	58	80	87	79	75	91
YDR086C	209	365	639	251	371	573
YDR087C	93	154	246	96	141	210
YDR088C	30	46	81	58	47	77
YDR089W	100	147	249	153	152	239
YDR090C	33	54	94	41	46	74
YDR091C	108	236	385	161	210	273
YDR092W	126	172	298	140	163	277
YDR093W	86	46	84	108	51	71
YDR094W	0	0	0	0	0	0
YDR095C	0	0	5	1	0	0
YDR096W	74	68	123	139	94	176
YDR097C	58	64	144	76	73	91
YDR098C	122	209	319	219	140	230
YDR098C-A	0	0	0	0	0	0
YDR098C-B	4306	5629	12277	7408	9827	20047
YDR099W	382	529	875	548	620	1015
YDR100W	60	75	138	84	60	118
YDR101C	94	177	316	157	152	256
YDR102C	2	3	4	2	3	8
YDR103W	80	105	170	96	95	153
YDR104C	24	36	66	30	35	48
YDR105C	70	95	150	100	100	116
YDR106W	2	9	4	4	10	15
YDR107C	40	17	42	44	43	41
YDR108W	40	42	60	60	47	64
YDR109C	28	36	72	42	42	47
YDR110W	39	50	46	51	44	59
YDR111C	40	37	70	44	42	71
YDR112W	0	6	6	5	3	1
YDR113C	19	30	49	36	30	56
YDR114C	1	1	8	4	1	7
YDR115W	34	57	64	44	56	70
YDR116C	27	75	110	66	60	102
YDR117C	77	99	174	105	94	143
YDR118W	17	35	61	39	36	51
YDR118W-A	2	3	3	1	4	1
YDR119W	158	176	329	166	111	198
YDR119W-A	17	13	14	17	16	12
YDR120C	98	112	211	166	100	180
YDR121W	23	44	78	36	60	78
YDR122W	105	102	186	201	117	211
YDR123C	10	15	22	27	16	30
YDR124W	9	9	27	18	15	32
YDR125C	9	14	21	13	15	16
YDR126W	12	39	46	18	34	50
YDR127W	299	249	416	469	280	396
YDR128W	53	80	116	82	65	111
YDR129C	573	580	976	758	481	760
YDR130C	19	31	45	24	37	63
YDR131C	15	52	79	35	52	70
YDR132C	35	34	68	36	35	53
YDR133C	84	150	257	47	132	166
YDR134C	116	141	231	193	182	285
YDR135C	161	208	391	268	213	317
YDR136C	2	2	6	4	1	2
YDR137W	40	87	156	68	99	131
YDR138W	37	41	100	55	59	87
YDR139C	77	130	194	106	130	193
YDR140W	36	56	89	38	46	60
YDR141C	100	136	196	161	126	143
YDR142C	28	50	85	39	46	80
YDR143C	35	36	82	75	64	112
YDR144C	66	75	118	84	86	120
YDR145W	122	161	245	217	196	306
YDR146C	31	36	68	67	49	80
YDR147W	36	53	75	42	40	55
YDR148C	194	170	300	220	161	293
YDR149C	0	0	0	2	0	0
YDR150W	116	170	284	341	233	410
YDR151C	166	166	241	165	191	255
YDR152W	80	122	187	120	127	180
YDR153C	46	87	129	125	112	173
YDR154C	1385	4114	5394	1164	2451	2997
YDR155C	999	858	1540	1411	770	1292
YDR156W	33	25	52	68	48	77
YDR157W	29	71	104	26	18	48
YDR158W	1105	1256	1944	983	898	1353
YDR159W	69	131	180	146	105	164
YDR160W	26	54	69	45	56	75
YDR161W	82	135	229	94	90	173
YDR162C	37	34	83	53	63	74
YDR163W	30	35	64	39	47	86
YDR164C	87	108	169	109	111	154
YDR165W	100	260	365	127	173	288
YDR166C	55	81	160	87	88	102
YDR167W	56	107	187	93	116	177
YDR168W	244	349	574	343	268	365
YDR169C	67	59	128	149	110	167
YDR169C-A	2	0	1	1	1	1
YDR170C	271	345	542	563	479	749
YDR170W-A	55	39	67	156	292	533
YDR171W	1358	973	1617	2360	1220	1981
YDR172W	315	494	837	520	481	744
YDR173C	19	28	56	25	42	34
YDR174W	372	266	459	325	213	374
YDR175C	33	55	99	58	64	103
YDR176W	68	108	153	107	111	129
YDR177W	256	354	652	218	328	488
YDR178W	101	108	215	146	124	173
YDR179C	16	38	46	9	35	41
YDR179W-A	18	39	46	20	32	47
YDR180W	28	86	103	43	60	87
YDR181C	29	47	75	32	55	62
YDR182W	64	101	155	135	97	116
YDR182W-A	5	13	22	1	8	13
YDR183C-A	9	16	35	12	22	28
YDR183W	18	23	71	29	40	57
YDR184C	17	71	84	50	74	134
YDR185C	14	29	54	19	28	41
YDR186C	77	92	189	169	157	252
YDR187C	1	5	4	5	0	2
YDR188W	267	344	556	386	303	558
YDR189W	121	142	283	190	181	257
YDR190C	233	431	743	342	352	563
YDR191W	13	21	23	9	21	20
YDR192C	24	29	59	22	37	61
YDR193W	0	0	0	0	1	0
YDR194C	170	251	374	232	241	338
YDR194W-A	0	0	0	0	0	2
YDR195W	42	76	93	38	64	81
YDR196C	93	163	247	92	102	157
YDR197W	38	80	93	54	72	105
YDR198C	20	54	82	40	52	69
YDR199W	6	16	13	3	6	12
YDR200C	44	62	74	60	54	73
YDR201W	20	43	69	23	44	68
YDR202C	58	101	160	57	90	133
YDR203W	0	0	1	3	0	0
YDR204W	87	80	131	137	82	130
YDR205W	19	44	57	60	41	75
YDR206W	72	111	182	115	112	202
YDR207C	65	70	120	109	72	159
YDR208W	80	79	135	129	110	155
YDR209C	74	115	180	61	149	173
YDR210C-C	0	0	0	0	0	0
YDR210C-D	4105	5602	11945	7033	9444	18917
YDR210W	0	0	0	0	0	0
YDR210W-A	0	0	0	0	0	0
YDR210W-B	1188	2066	4118	1539	2073	3703
YDR211W	203	293	531	243	217	353
YDR212W	390	480	721	380	386	553
YDR213W	93	37	78	108	49	66
YDR214W	304	238	424	426	210	355
YDR215C	4	8	7	5	6	5
YDR216W	63	48	75	121	72	88
YDR217C	61	94	153	102	93	135
YDR218C	0	5	9	5	3	6
YDR219C	38	50	107	40	46	73
YDR220C	2	3	1	3	5	3
YDR221W	38	33	62	87	48	86
YDR222W	63	111	210	78	100	165
YDR223W	20	17	26	25	13	26
YDR224C	348	745	1179	383	800	1360
YDR225W	330	798	1446	294	638	1052
YDR226W	919	1132	1894	987	705	1193
YDR227W	49	74	140	55	56	97
YDR228C	45	63	104	80	82	118
YDR229W	79	105	148	97	86	143
YDR230W	3	11	11	3	7	12
YDR231C	20	24	32	21	16	29
YDR232W	223	112	183	219	118	193
YDR233C	248	380	673	306	551	831
YDR234W	68	109	177	112	82	159
YDR235W	49	91	118	59	77	111
YDR236C	61	97	183	75	70	121
YDR237W	71	87	154	88	72	111
YDR238C	550	446	792	692	396	575
YDR239C	31	39	73	44	45	68
YDR240C	30	47	79	33	35	81
YDR241W	8	19	22	19	18	23
YDR242W	31	55	71	50	45	61
YDR243C	19	32	54	46	34	43
YDR244W	40	49	71	78	64	67
YDR245W	114	168	288	130	161	228
YDR246W	33	36	68	74	59	125
YDR246W-A	3	0	5	1	2	5
YDR247W	75	46	99	124	73	132
YDR248C	49	113	189	64	88	146
YDR249C	11	45	47	24	27	35
YDR250C	1	2	1	0	6	2
YDR251W	186	220	365	286	225	360
YDR252W	5	15	23	16	7	15
YDR253C	30	65	81	42	64	90
YDR254W	55	68	102	33	40	75
YDR255C	45	41	70	48	38	82
YDR256C	19	22	41	22	23	35
YDR257C	55	95	126	84	83	145
YDR258C	1596	971	1616	2285	972	1603
YDR259C	26	26	38	26	31	32
YDR260C	12	20	46	34	23	48
YDR261C	82	126	201	134	101	156
YDR261C-C	0	0	0	0	0	0
YDR261C-D	4189	5314	11590	7545	9690	19881
YDR261W-A	0	0	0	0	0	0
YDR261W-B	1094	1913	3683	1365	1894	3315
YDR262W	63	122	206	107	142	222
YDR263C	6	15	28	14	18	22
YDR264C	161	211	339	216	191	297
YDR265W	51	38	69	54	48	69
YDR266C	70	104	168	123	89	166
YDR267C	49	70	106	81	59	134
YDR268W	28	67	98	34	43	61
YDR269C	0	0	0	0	0	0
YDR270W	13	30	35	31	34	63
YDR271C	1	5	5	0	3	1
YDR272W	139	145	265	125	151	219
YDR273W	12	20	24	19	14	22
YDR274C	1	5	2	12	6	10
YDR275W	25	62	106	39	58	85
YDR276C	369	724	1198	497	812	1341
YDR277C	45	27	42	85	47	66
YDR278C	0	0	1	0	1	0
YDR279W	41	54	104	41	50	76
YDR280W	57	115	152	79	104	166
YDR281C	14	29	51	47	23	44
YDR282C	19	34	52	35	22	38
YDR283C	51	91	147	93	93	144
YDR284C	108	131	229	121	103	184
YDR285W	16	34	54	30	25	35
YDR286C	20	27	51	20	34	62
YDR287W	42	30	58	51	36	46
YDR288W	25	63	137	50	62	87
YDR289C	41	51	74	74	52	94
YDR290W	0	0	2	1	1	1
YDR291W	56	74	111	91	76	117
YDR292C	124	206	330	171	163	269
YDR293C	248	265	359	521	377	599
YDR294C	172	164	276	224	163	263
YDR295C	49	64	102	62	60	80
YDR296W	83	84	119	81	67	141
YDR297W	173	230	351	206	229	359
YDR298C	143	190	293	192	161	231
YDR299W	62	87	108	91	96	120
YDR300C	100	127	217	110	137	179
YDR301W	65	75	121	125	84	134
YDR302W	26	69	102	31	55	66
YDR303C	72	114	197	75	90	127
YDR304C	505	548	956	571	526	803
YDR305C	28	85	106	41	58	80
YDR306C	57	93	143	97	72	126
YDR307W	58	79	120	85	77	110
YDR308C	46	89	113	53	84	128
YDR309C	82	107	149	123	158	191
YDR310C	86	81	141	130	79	119
YDR311W	61	96	143	74	84	126
YDR312W	43	53	93	56	57	80
YDR313C	41	43	52	38	27	54
YDR314C	10	13	35	25	21	31
YDR315C	29	37	45	29	41	50
YDR316W	24	63	95	48	45	80
YDR316W-A	0	0	0	0	0	0
YDR316W-B	4517	6004	13105	7927	10344	20953
YDR317W	14	21	42	12	17	31
YDR318W	37	57	110	31	54	72
YDR319C	67	103	136	86	94	138
YDR320C	45	53	101	72	40	84
YDR320C-A	35	116	168	44	82	137
YDR320W-B	0	3	1	1	2	0
YDR321W	176	307	455	229	177	258
YDR322C-A	53	89	123	85	86	131
YDR322W	61	75	142	68	81	107
YDR323C	22	39	76	33	31	55
YDR324C	74	150	256	142	145	229
YDR325W	38	63	82	60	73	104
YDR326C	46	107	151	115	157	255
YDR327W	114	165	247	110	134	219
YDR328C	125	108	215	177	160	256
YDR329C	51	72	133	101	71	122
YDR330W	63	84	160	140	115	159
YDR331W	54	59	77	73	46	69
YDR332W	41	64	95	54	56	78
YDR333C	96	136	215	132	107	168
YDR334W	63	92	143	104	100	131
YDR335W	172	228	359	327	200	314
YDR336W	29	56	94	34	54	61
YDR337W	54	85	123	58	68	112
YDR338C	32	48	79	40	35	57
YDR339C	58	101	142	55	105	148
YDR340W	1	0	5	1	2	2
YDR341C	403	509	769	506	363	592
YDR342C	1125	389	719	1470	382	625
YDR343C	1102	347	677	1392	383	607
YDR344C	4	2	2	2	1	4
YDR345C	870	903	1719	1106	918	1455
YDR346C	198	372	615	285	345	482
YDR347W	49	88	168	93	91	151
YDR348C	67	104	185	144	108	185
YDR349C	106	183	300	167	179	279
YDR350C	44	61	81	44	65	78
YDR351W	61	95	157	74	105	153
YDR352W	41	57	114	58	54	87
YDR353W	535	518	829	563	476	809
YDR354C-A	0	0	0	0	0	0
YDR354W	65	76	162	96	86	136
YDR355C	0	0	0	1	0	0
YDR356W	64	72	108	84	50	81
YDR357C	38	101	156	47	66	124
YDR358W	119	146	233	166	124	242
YDR359C	38	48	58	73	42	74
YDR360W	0	0	1	1	1	0
YDR361C	63	128	233	110	96	154
YDR362C	40	57	88	61	61	82
YDR363W	38	34	55	34	42	52
YDR363W-A	85	210	327	198	206	353
YDR364C	26	61	85	47	45	61
YDR365C	317	478	779	498	508	752
YDR365W-A	0	0	0	0	0	0
YDR365W-B	4722	6314	13618	7934	10027	20344
YDR366C	0	3	5	2	4	9
YDR367W	61	119	178	86	94	145
YDR368W	186	333	527	250	198	357
YDR369C	28	50	81	49	53	65
YDR370C	29	71	106	38	59	104
YDR371C-A	0	0	0	0	0	0
YDR371W	32	72	122	49	79	94
YDR372C	146	267	407	200	192	279
YDR373W	67	177	250	93	107	179
YDR374C	0	3	4	1	5	4
YDR374W-A	19	28	36	4	25	45
YDR375C	42	53	102	44	58	106
YDR376W	67	77	108	89	58	90
YDR377W	114	140	225	119	97	174
YDR378C	110	175	343	141	151	268
YDR379C-A	20	24	40	12	36	48
YDR379W	74	113	170	117	125	121
YDR380W	107	79	134	151	88	124
YDR381C-A	26	58	90	37	53	111
YDR381W	239	284	407	224	230	402
YDR382W	1822	1721	2839	1387	1468	2393
YDR383C	152	266	344	76	140	155
YDR384C	55	75	127	62	72	124
YDR385W	1452	1288	3066	1430	1062	2392
YDR386W	12	38	46	37	39	56
YDR387C	59	53	91	80	63	103
YDR388W	391	201	427	519	272	462
YDR389W	61	54	83	98	74	118
YDR390C	103	171	237	148	121	209
YDR391C	97	148	245	143	150	245
YDR392W	42	68	122	61	63	105
YDR393W	28	47	95	52	45	85
YDR394W	278	380	646	463	400	615
YDR395W	186	270	395	310	267	334
YDR396W	11	40	61	19	19	35
YDR397C	5	6	8	6	1	4
YDR398W	103	131	190	177	131	195
YDR399W	176	472	771	253	477	790
YDR400W	69	46	121	78	67	102
YDR401W	3	3	4	1	4	5
YDR402C	0	2	3	3	2	1
YDR403W	2	10	13	9	14	22
YDR404C	58	119	226	94	111	173
YDR405W	42	40	52	73	53	70
YDR406W	84	91	171	130	106	168
YDR406W-A	0	17	7	1	2	7
YDR407C	73	121	186	101	103	183
YDR408C	116	119	230	132	127	204
YDR409W	45	55	96	76	69	107
YDR410C	33	92	113	46	50	83
YDR411C	48	70	87	68	79	125
YDR412W	11	15	22	14	12	27
YDR413C	0	1	2	2	0	0
YDR414C	25	71	99	35	76	87
YDR415C	33	62	117	82	47	101
YDR416W	35	79	98	62	64	85
YDR417C	1	3	6	4	5	2
YDR418W	540	1152	1754	439	845	1354
YDR419W	30	33	61	31	38	57
YDR420W	51	38	94	146	171	458
YDR421W	50	78	129	74	75	121
YDR422C	50	71	105	81	69	100
YDR423C	50	56	115	81	58	89
YDR424C	57	97	163	72	89	113
YDR425W	36	28	64	61	48	92
YDR426C	3	0	5	0	2	4
YDR427W	257	476	714	342	460	611
YDR428C	47	60	91	40	60	74
YDR429C	407	535	826	472	525	717
YDR430C	53	81	126	84	71	119
YDR431W	0	0	0	0	2	2
YDR432W	253	110	195	423	224	374
YDR433W	5	14	14	3	11	11
YDR434W	111	180	304	127	118	185
YDR435C	66	111	195	91	101	160
YDR436W	41	54	91	70	49	86
YDR437W	6	7	6	8	6	15
YDR438W	14	29	51	24	31	34
YDR439W	20	24	51	40	18	55
YDR440W	35	58	85	64	57	78
YDR441C	23	35	64	25	33	44
YDR442W	0	1	1	0	0	1
YDR443C	42	33	61	85	48	86
YDR444W	26	44	85	58	52	84
YDR445C	0	2	3	0	1	2
YDR446W	6	21	31	7	9	8
YDR447C	2773	4909	8094	2470	3476	5465
YDR448W	21	24	36	21	18	27
YDR449C	51	118	164	61	118	166
YDR450W	2311	4189	7073	2574	3528	5449
YDR451C	22	29	78	28	40	65
YDR452W	315	368	619	346	252	397
YDR453C	74	44	76	76	51	87
YDR454C	249	453	671	258	278	475
YDR455C	0	0	1	2	0	1
YDR456W	60	106	193	93	100	172
YDR457W	161	156	315	341	264	363
YDR458C	85	96	169	104	94	143
YDR459C	23	42	64	31	35	69
YDR460W	39	47	71	47	29	68
YDR461C-A	25	19	41	29	29	35
YDR461W	97	226	407	200	324	621
YDR462W	21	40	49	26	40	57
YDR463W	58	126	153	117	125	201
YDR464C-A	0	0	0	0	0	0
YDR464W	76	72	106	127	59	92
YDR465C	98	161	258	155	156	223
YDR466W	59	52	85	82	86	119
YDR467C	5	13	25	5	9	12
YDR468C	62	84	116	97	80	123
YDR469W	38	88	124	64	72	119
YDR470C	43	55	65	58	40	56
YDR471W	701	1588	2586	732	1503	2454
YDR472W	37	62	103	50	57	112
YDR473C	26	51	104	61	50	95
YDR475C	113	118	207	169	121	192
YDR476C	64	46	88	81	60	100
YDR477W	132	159	268	203	169	260
YDR478W	20	39	42	19	25	37
YDR479C	72	105	139	102	98	165
YDR480W	12	29	63	29	26	68
YDR481C	283	343	646	423	348	569
YDR482C	22	19	40	28	31	68
YDR483W	358	392	686	379	347	524
YDR484W	45	69	92	38	54	97
YDR485C	45	70	101	87	54	99
YDR486C	44	70	135	117	104	161
YDR487C	266	287	497	338	275	451
YDR488C	20	18	22	24	13	20
YDR489W	13	30	42	40	37	44
YDR490C	42	54	66	60	42	68
YDR491C	6	12	11	5	13	11
YDR492W	26	58	99	51	53	99
YDR493W	29	23	50	23	39	41
YDR494W	89	148	238	113	142	167
YDR495C	51	65	111	75	75	103
YDR496C	170	270	373	167	208	291
YDR497C	301	293	530	406	205	385
YDR498C	43	52	100	36	77	89
YDR499W	33	63	87	39	43	72
YDR500C	602	900	1720	743	949	1601
YDR501W	9	13	18	20	20	34
YDR502C	393	357	680	513	383	679
YDR503C	15	27	43	30	24	38
YDR504C	38	72	80	70	60	55
YDR505C	132	121	214	206	134	201
YDR506C	27	25	31	46	24	24
YDR507C	77	90	159	111	88	172
YDR508C	205	151	258	224	145	248
YDR509W	2	0	0	0	4	0
YDR510C-A	29	122	161	48	94	139
YDR510W	117	184	266	185	225	404
YDR511W	40	78	112	63	79	128
YDR512C	15	52	86	78	60	90
YDR513W	154	196	320	172	187	269
YDR514C	24	48	64	29	34	73
YDR515W	23	27	50	42	30	46
YDR516C	784	375	601	1028	401	643
YDR517W	201	132	234	228	139	276
YDR518W	91	161	235	120	100	143
YDR519W	79	127	215	99	107	157
YDR520C	30	50	69	44	31	50
YDR521W	0	1	1	1	0	1
YDR522C	4	7	14	3	7	18
YDR523C	0	5	9	4	8	5
YDR524C	20	39	69	50	73	77
YDR524C-A	1	1	1	0	0	0
YDR524C-B	2485	2815	4910	3116	3593	6243
YDR524W-C	951	2782	4293	747	2102	2886
YDR525W	0	0	1	0	0	0
YDR525W-A	37	40	58	33	20	21
YDR526C	1	1	0	0	3	1
YDR527W	86	93	155	92	83	141
YDR528W	16	16	41	21	30	41
YDR529C	167	181	291	199	183	290
YDR530C	47	40	57	78	56	74
YDR531W	120	217	337	116	150	233
YDR532C	21	70	93	43	40	70
YDR533C	55	66	132	80	75	112
YDR534C	2	9	13	7	11	8
YDR535C	0	1	1	1	1	4
YDR536W	8	12	24	9	10	24
YDR537C	0	3	0	6	1	0
YDR538W	8	14	11	8	7	7
YDR539W	101	99	184	108	94	150
YDR540C	6	15	20	4	12	14
YDR541C	34	53	106	64	48	85
YDR542W	3	5	14	1	4	9
YDR543C	0	2	3	0	2	1
YDR544C	0	8	8	1	3	22
YDR545C-A	0	0	0	0	0	0
YDR545W	208	195	517	286	269	546
YEL001C	172	294	413	191	208	338
YEL002C	163	181	314	237	160	248
YEL003W	85	216	341	77	172	252
YEL004W	30	52	65	27	28	54
YEL005C	25	36	62	36	51	81
YEL006W	34	64	103	58	61	106
YEL007W	80	164	237	147	212	364
YEL008C-A	0	0	0	0	0	0
YEL008W	1	3	3	0	1	3
YEL009C	1022	1247	2089	1151	1079	1706
YEL009C-A	0	1	0	0	0	0
YEL010W	1	1	0	0	0	2
YEL011W	491	202	327	525	160	254
YEL012W	62	81	150	84	93	159
YEL013W	158	126	217	197	102	195
YEL014C	12	22	36	11	21	18
YEL015W	99	122	204	158	121	196
YEL016C	29	53	88	27	59	68
YEL017C-A	255	209	414	272	338	538
YEL017W	44	77	108	63	87	130
YEL018C-A	0	0	0	0	1	0
YEL018W	14	21	31	11	23	42
YEL019C	2	1	11	9	7	17
YEL020C	36	48	84	65	41	56
YEL020C-B	6	7	11	6	2	6
YEL020W-A	9	10	21	9	12	12
YEL021W	0	0	0	0	0	0
YEL022W	101	159	220	142	184	218
YEL023C	15	21	42	21	32	56
YEL024W	61	49	68	74	63	101
YEL025C	64	89	130	116	80	118
YEL026W	232	447	714	259	510	919
YEL027W	695	841	1439	845	710	1209
YEL028W	6	25	19	12	24	27
YEL029C	37	64	95	55	61	105
YEL030C-A	0	0	0	0	2	0
YEL030W	11	23	34	21	21	35
YEL031W	350	311	502	473	289	398
YEL032C-A	0	0	0	0	0	0
YEL032W	64	68	110	72	73	127
YEL033W	367	914	1224	168	277	331
YEL034C-A	5	9	16	22	20	43
YEL034W	0	0	0	0	0	0
YEL035C	0	0	3	1	2	1
YEL036C	100	90	202	161	171	331
YEL037C	156	197	336	257	189	324
YEL038W	95	134	231	122	83	181
YEL039C	98	81	115	141	68	140
YEL040W	483	702	1144	717	871	1278
YEL041W	11	20	33	25	10	31
YEL042W	91	126	200	111	137	210
YEL043W	98	91	120	165	109	210
YEL044W	54	66	116	78	56	102
YEL045C	4	2	10	40	19	13
YEL046C	443	379	728	590	463	791
YEL047C	161	158	217	189	118	220
YEL048C	6	11	20	7	8	24
YEL049W	4	4	11	0	5	12
YEL050C	60	73	124	85	89	135
YEL050W-A	7	19	38	3	17	24
YEL051W	517	671	1058	513	476	743
YEL052W	100	117	223	143	105	147
YEL053C	52	84	139	73	82	115
YEL053W-A	1	8	9	5	6	7
YEL054C	482	844	1407	397	671	971
YEL055C	139	128	220	177	116	160
YEL056W	88	129	164	107	108	160
YEL057C	6	8	14	2	9	14
YEL058W	267	300	528	267	217	363
YEL059C-A	8	10	38	7	17	22
YEL059W	1	3	4	2	5	6
YEL060C	468	260	386	625	278	510
YEL061C	43	77	138	76	77	114
YEL062W	29	31	47	32	37	49
YEL063C	54	71	102	84	81	114
YEL064C	9	16	37	30	20	41
YEL065W	51	114	174	85	85	144
YEL066W	30	34	57	29	34	70
YEL067C	4	1	12	7	3	5
YEL068C	17	20	43	15	27	37
YEL069C	2	4	5	5	7	9
YEL070W	3	5	6	4	7	14
YEL071W	471	689	1145	572	679	1056
YEL072W	16	35	53	34	21	24
YEL073C	5	0	7	5	5	11
YEL074W	0	4	8	1	1	8
YEL075C	4	6	9	4	3	10
YEL075W-A	2	0	9	3	4	10
YEL076C	0	2	1	1	2	3
YEL076C-A	7	1	6	2	5	7
YEL077C	114	124	302	183	161	276
YEL077W-A	0	0	0	0	0	0
YER001W	90	160	266	142	135	213
YER002W	76	137	260	102	148	243
YER003C	259	324	507	285	267	341
YER004W	112	98	201	111	103	168
YER005W	51	61	135	86	71	106
YER006C-A	4	19	29	1	14	17
YER006W	190	304	472	275	259	399
YER007C-A	121	196	338	119	165	252
YER007W	26	38	78	33	37	67
YER008C	96	149	203	188	159	226
YER009W	430	761	1142	381	629	1022
YER010C	52	109	201	89	112	160
YER011W	90	131	226	111	129	242
YER012W	231	369	694	269	389	585
YER013W	55	57	99	101	65	85
YER014C-A	0	0	0	0	0	0
YER014W	34	48	71	54	36	72
YER015W	16	28	42	23	23	55
YER016W	76	67	118	120	79	135
YER017C	92	101	152	129	88	145
YER018C	26	18	35	28	26	55
YER019C-A	228	546	766	208	355	585
YER019W	88	105	160	87	92	143
YER020W	123	87	156	164	95	153
YER021W	375	644	976	534	532	837
YER022W	78	113	207	95	112	178
YER023C-A	0	0	0	0	0	0
YER023W	261	176	288	280	181	291
YER024W	32	43	87	36	44	84
YER025W	371	536	884	510	331	560
YER026C	128	177	284	150	132	234
YER027C	121	149	239	154	148	228
YER028C	12	33	33	29	21	38
YER029C	26	48	60	28	36	68
YER030W	105	213	341	210	258	379
YER031C	167	258	390	180	197	344
YER032W	23	35	60	42	49	70
YER033C	33	28	53	81	33	54
YER034W	21	12	24	22	21	33
YER035W	38	44	59	85	29	67
YER036C	470	518	791	556	407	640
YER037W	191	261	402	258	219	318
YER038C	54	127	160	60	78	99
YER038W-A	0	1	0	0	0	0
YER039C	3	3	6	3	8	6
YER039C-A	1	4	9	1	5	1
YER040W	36	34	71	76	75	135
YER041W	25	41	55	41	53	80
YER042W	153	237	362	170	279	386
YER043C	867	938	1598	1023	802	1317
YER044C	102	137	197	97	135	186
YER044C-A	3	8	11	6	4	7
YER045C	35	50	94	70	58	94
YER046W	15	15	38	14	16	34
YER046W-A	0	2	3	2	1	3
YER047C	33	28	38	55	48	61
YER048C	202	252	439	299	227	349
YER048W-A	40	101	147	69	97	117
YER049W	127	261	411	179	171	311
YER050C	55	139	218	82	136	206
YER051W	24	43	57	50	42	52
YER052C	269	445	736	443	521	698
YER053C	322	400	641	458	366	526
YER053C-A	8	7	11	30	5	26
YER054C	27	34	54	42	19	42
YER055C	410	618	922	544	429	723
YER056C	339	467	813	381	454	732
YER056C-A	892	1459	2436	1008	1382	2207
YER057C	191	266	459	252	282	414
YER058W	13	28	44	30	35	52
YER059W	55	83	144	85	102	139
YER060W	55	67	114	65	54	100
YER060W-A	62	100	209	98	111	200
YER061C	63	82	128	110	99	147
YER062C	429	446	806	536	489	811
YER063W	85	119	204	132	100	169
YER064C	111	118	183	195	151	244
YER065C	26	44	49	48	36	61
YER066C-A	37	37	57	74	38	41
YER066W	12	20	55	23	27	38
YER067C-A	11	3	4	11	5	8
YER067W	2	1	1	1	3	2
YER068C-A	0	0	2	0	0	1
YER068W	56	79	142	115	118	162
YER069W	50	70	103	71	71	120
YER070W	123	203	332	184	246	306
YER071C	28	55	84	39	30	59
YER072W	471	775	1181	538	725	1072
YER073W	374	377	616	369	224	336
YER074W	1582	2303	4015	1483	2139	3606
YER074W-A	58	107	153	88	113	161
YER075C	16	32	54	20	36	50
YER076C	15	8	21	13	21	30
YER076W-A	3	4	14	7	16	15
YER077C	33	61	79	43	57	72
YER078C	42	90	108	74	81	120
YER078W-A	0	1	4	0	2	0
YER079C-A	0	0	1	1	0	0
YER079W	165	134	226	163	136	239
YER080W	148	156	316	212	166	274
YER081W	176	276	392	193	234	346
YER082C	88	111	209	107	116	185
YER083C	63	140	217	110	120	194
YER084W	0	2	0	0	2	0
YER084W-A	1	0	0	1	0	0
YER085C	0	0	0	0	0	0
YER086W	330	326	532	435	319	534
YER087C-A	6	19	15	7	10	4
YER087C-B	65	122	180	100	120	215
YER087W	34	36	69	42	37	63
YER088C	326	203	351	619	348	611
YER088C-A	5	7	10	9	6	14
YER088W-B	0	0	0	0	0	0
YER089C	78	68	100	111	72	129
YER090C-A	0	0	0	0	0	0
YER090W	227	215	353	298	190	326
YER091C	1033	992	1667	1456	808	1331
YER091C-A	0	0	4	2	1	0
YER092W	46	88	131	77	78	142
YER093C	59	81	151	81	87	130
YER093C-A	5	10	28	10	21	42
YER094C	257	308	624	295	286	489
YER095W	57	48	71	63	39	75
YER096W	5	9	13	6	7	6
YER097W	0	1	1	7	0	5
YER098W	47	42	72	59	45	62
YER099C	81	131	191	108	123	171
YER100W	88	128	234	130	156	222
YER101C	24	37	73	37	23	57
YER102W	5571	6923	11576	5008	5177	8064
YER103W	2544	922	1503	3487	996	1656
YER104W	6	16	15	11	11	19
YER105C	110	138	223	195	148	209
YER106W	1	3	6	1	4	6
YER107C	73	96	202	91	95	136
YER107W-A	10	16	32	41	16	23
YER109C	34	44	72	47	53	70
YER110C	270	322	553	392	312	468
YER111C	26	27	33	71	47	87
YER112W	65	168	210	97	173	252
YER113C	50	90	122	55	115	111
YER114C	54	61	100	122	73	133
YER115C	31	53	81	33	39	57
YER116C	13	21	27	31	23	22
YER117W	1833	3164	5363	2082	2207	3755
YER118C	46	81	142	74	74	118
YER119C	53	50	87	73	66	104
YER119C-A	2	1	1	2	1	2
YER120W	160	210	330	193	215	352
YER121W	9	9	17	17	11	16
YER122C	190	262	414	350	271	410
YER123W	50	75	133	89	95	145
YER124C	203	365	558	239	376	530
YER125W	298	181	306	430	237	342
YER126C	94	93	145	176	124	203
YER127W	45	67	157	72	102	170
YER128W	12	21	23	11	19	33
YER129W	54	78	133	120	109	174
YER130C	119	275	388	170	254	403
YER131W	1833	2943	5143	2223	2946	4813
YER132C	47	47	100	87	99	123
YER133W	462	530	893	443	402	612
YER133W-A	22	32	28	13	25	27
YER134C	20	34	57	44	42	50
YER135C	2	3	3	1	2	2
YER136W	265	292	507	456	308	419
YER137C	2	1	5	2	11	8
YER137C-A	0	0	0	0	0	0
YER137W-A	0	0	0	0	0	0
YER138C	5009	6819	14668	8378	10667	21467
YER138W-A	3	15	27	3	10	16
YER139C	19	24	41	27	32	36
YER140W	20	50	80	48	38	82
YER141W	153	143	224	205	98	202
YER142C	56	92	142	45	47	70
YER143W	76	68	129	123	90	154
YER144C	57	94	123	94	116	153
YER145C	96	107	171	105	95	166
YER145C-A	1	1	5	4	2	3
YER146W	0	7	4	5	3	7
YER147C	38	35	40	39	23	26
YER147C-A	16	30	42	25	40	36
YER148W	83	206	322	97	140	223
YER148W-A	7	52	49	4	25	23
YER149C	24	27	32	34	26	37
YER150W	501	352	587	802	546	892
YER151C	94	175	277	235	235	309
YER152C	82	99	156	127	79	153
YER152W-A	0	0	0	0	0	0
YER153C	17	6	4	16	6	13
YER154W	65	81	121	105	109	149
YER155C	178	276	456	341	327	445
YER156C	110	163	251	177	156	241
YER157W	62	115	178	81	110	168
YER158C	31	44	74	43	48	95
YER158W-A	8	23	44	7	14	30
YER159C	39	53	99	66	68	148
YER159C-A	0	0	0	0	0	0
YER160C	3566	4758	10414	6077	8595	17481
YER161C	35	57	100	72	66	117
YER162C	33	44	62	57	36	60
YER163C	49	77	149	89	64	115
YER164W	100	78	131	150	78	131
YER165C-A	0	0	1	1	1	1
YER165W	895	777	1412	1265	730	1227
YER166W	99	93	188	153	114	157
YER167W	92	151	256	146	116	153
YER168C	58	91	142	68	72	122
YER169W	48	69	118	115	101	134
YER170W	16	22	36	24	25	35
YER171W	67	133	180	91	89	156
YER172C	75	107	193	128	105	162
YER172C-A	0	0	1	0	0	0
YER173W	17	41	84	26	49	53
YER174C	44	80	125	57	75	86
YER175C	33	52	86	64	62	75
YER175W-A	1	4	3	2	4	8
YER176W	86	109	164	185	123	159
YER177W	2348	2111	3696	2729	1568	2677
YER178W	722	825	1304	799	605	1043
YER179W	9	16	17	19	20	24
YER180C	16	33	55	22	42	44
YER180C-A	7	5	6	4	10	15
YER181C	1	0	3	0	2	3
YER182W	52	109	136	73	79	100
[truncated: 5,125 more rows]
