# Supplementary material for: Differential expression analysis for sequence count data
Source: Genome Biol. 2010 Oct 27;11(10):R106. doi: 10.1186/gb-2010-11-10-r106 (PMC3218662; doi:10.1186/gb-2010-11-10-r106)
Supplement: Additional file 3 — Raw data. Tarball containing the raw data for the presented analyses. [file gb-2010-11-10-r106-S3.TGZ › suppl_data/fly_RNA_counts.tsv]

A1	A2	B1	B2
29	26	2	1
13068	11654	12314	11938
605	606	710	520
1286	1045	848	831
269	196	170	113
22	12	15	7
0	0	0	0
1	0	0	0
0	0	0	0
5	2	1	0
240	212	261	169
3345	2910	2445	2562
0	0	0	0
2	0	3	0
14	16	27	10
0	0	0	0
4	0	1	1
0	0	0	0
3770	3654	4023	4654
4415	3695	2866	3547
39	45	119	176
3993	3503	4079	3969
2034	1779	2081	2005
967	783	922	1194
0	0	0	0
0	0	0	0
0	0	0	0
0	0	0	0
0	0	0	0
0	0	0	0
0	0	0	0
0	0	0	0
30172	29662	26520	27767
8	5	5	7
10	3	4	4
8	7	7	9
171	244	127	170
1359	1195	1488	1064
3623	3381	3138	3525
236	189	165	207
1116	960	918	840
2	2	2	1
2	2	2	1
0	0	1	4
0	0	1	0
6	8	10	7
156	187	187	191
127	162	149	148
533	619	708	701
621	592	728	549
141	109	134	121
23	20	23	6
16	12	25	11
278	259	291	301
4	2	1	2
294	348	324	300
2	0	2	0
10868	10331	9764	10187
180	182	232	188
2395	2160	2226	2278
58	70	174	129
194	185	120	230
2741	2298	2141	2228
374	381	357	361
679	469	695	557
8	6	3	5
1849	1636	1929	1651
28	20	43	29
84	76	90	88
2593	2555	2420	2081
25	44	18	35
4	4	1	3
0	2	0	2
0	0	0	2
120	96	49	101
123	96	126	99
1688	1625	1830	1833
168	187	169	216
237	172	174	125
116	107	107	64
478	515	401	411
3698	3607	3401	3028
710	707	582	550
745	739	591	557
2566	2139	2457	2113
2945	2777	2819	2447
436	369	462	307
4785	4473	4469	3715
129	89	85	120
467	390	347	430
50	26	14	36
259	216	178	235
344	293	255	306
17	18	12	16
38709	34978	32280	32366
195	173	202	189
400	419	428	254
68	75	65	54
72	76	75	60
594	547	636	542
171	128	220	143
727	608	893	704
1865	1748	1520	1434
0	0	0	0
10	10	13	15
1625	1454	2018	1375
44	20	38	25
23797	20598	24735	19647
6	4	6	3
289	178	227	132
4171	3307	3644	2347
108203	92818	107598	114932
58	81	110	247
39	57	62	139
61	87	124	253
2682	2199	2162	2108
225	221	226	230
3338	2990	4050	2685
0	0	0	0
6	4	0	1
540	475	477	450
52	58	75	46
10305	9157	10060	9419
445	312	489	388
96	69	80	83
213	169	129	156
0	2	0	0
0	0	0	0
315	319	260	255
110	80	85	73
83	52	58	48
288	252	297	260
417	350	431	367
597	543	617	473
1167	907	1308	985
4	3	7	3
2454	1955	1924	1815
499	436	640	468
72	56	82	68
5	0	2	4
2	0	0	0
153	102	182	166
44	44	21	22
1118	1079	1096	973
28	23	43	27
30	54	54	51
586	720	774	558
466	334	268	310
0	0	0	0
0	0	1	0
56	76	53	36
0	0	0	0
0	0	0	2
7	15	21	16
20	12	7	2
0	0	7	9
0	0	3	0
0	0	1	0
74	102	148	143
79	56	58	62
1372	1161	1336	1034
1842	1553	1847	1392
995	832	890	727
34	24	34	28
2553	2236	2160	1786
4	8	8	9
7122	6086	5614	5001
3928	3208	3134	2666
4806	4120	4532	3801
339	307	272	245
165	157	163	141
4610	3862	4290	2978
2	7	3	4
4	0	2	4
121	99	137	103
376	313	488	357
0	0	0	0
532	447	597	460
80	97	105	65
1217	948	1115	1104
46	47	48	31
2202	2024	2006	1998
140	121	137	121
0	2	1	4
160	120	182	126
7983	7540	6855	6139
0	0	0	0
0	1	2	0
0	0	0	1
60	55	65	39
4	0	0	0
0	2	1	0
41	49	57	37
39	56	43	44
1416	1234	1601	1333
329	260	330	287
4	2	4	1
1153	1071	1100	1067
1244	1008	1510	1368
3101	2569	2725	2187
110	166	59	61
4	14	5	2
11	18	4	3
4	8	5	2
1250	1219	1290	1143
693	646	669	598
0	0	0	0
0	0	0	0
261	269	361	305
95	62	79	61
7	7	15	6
14	5	12	6
117	116	139	101
30	23	35	23
33	63	53	38
351	323	266	298
992	833	1114	704
23	27	55	18
782	747	929	896
147	183	204	186
0	0	1	0
0	0	0	0
0	0	0	1
495	392	401	364
1	0	0	1
480	368	380	346
0	0	0	0
329	242	348	284
1679	1604	1430	1533
2693	2549	2043	2125
1739	1804	1752	1891
560	574	518	516
621	619	607	618
2994	2644	2700	2165
977	807	967	667
751	637	736	526
390	253	200	263
523	382	292	359
5122	4105	3842	4050
492	474	391	402
3	0	7	1
6130	5817	5155	4373
113	66	79	65
673	523	740	685
475	379	538	449
162	74	81	66
41	16	22	16
3	1	2	3
0	2	6	2
11	10	10	12
2353	2313	2173	1884
577	557	601	416
16	12	36	19
11	3	6	3
20	24	14	13
3761	3116	3670	2668
537	477	631	447
350	338	347	301
233	222	292	209
1447	1202	1653	1339
133	141	128	151
1763	1693	1413	1312
1491	1263	1176	1059
110	114	70	81
33	26	46	26
629	604	567	580
4554	4317	4034	3158
2339	2288	2146	1642
287	247	273	308
304	266	230	244
1055	994	902	916
0	2	3	1
2	0	1	2
142	135	177	155
1238	880	1153	785
199	156	212	142
4837	4738	3278	3791
1191	1077	707	808
857	766	523	551
177	143	117	36
0	0	0	0
0	3	0	0
156	89	86	87
52	52	56	34
430	406	474	471
228	206	233	138
59	67	87	58
96	89	116	98
125	117	140	114
815	778	638	733
1168	821	1069	910
0	4	3	2
2121	1953	2173	1772
1840	1493	1516	1399
6	9	13	6
14	11	13	15
6	4	4	5
904	976	1090	835
503	283	355	231
2	2	2	1
0	0	0	0
450	380	417	408
200	161	149	148
49	35	75	49
782	638	797	639
503	391	393	353
17	19	14	13
0	0	9	4
34	36	16	20
1867	1880	1864	1665
1413	1229	1253	1179
594	466	554	444
4	12	6	4
13	1	6	1
12	14	20	12
12	4	4	8
1102	962	1304	970
88	67	106	85
9	20	31	17
12	6	3	7
12184	11119	8692	7626
969	860	702	606
587	398	363	395
1711	1304	1384	845
2522	2365	2369	2098
3389	2846	2922	2582
2949	2499	2126	2122
3620	3162	2982	2797
1	2	0	1
793	724	1051	718
1715	1456	1783	1387
418	321	486	437
5651	4946	5326	4813
180	129	201	138
1727	1658	2105	1396
6	9	2	2
2352	1943	2326	1866
460	336	414	302
357	419	276	307
228	207	266	171
0	0	1	0
213	147	284	188
185	137	123	139
142	184	136	170
0	0	1	0
659	588	516	469
5	14	15	19
31	68	65	69
2	0	1	0
0	0	0	0
21	13	28	23
187	156	249	161
701	616	684	578
10	6	13	6
569	495	630	429
17	20	21	15
41	69	47	27
13	6	27	28
77	57	106	66
2	0	1	2
1002	733	1003	868
258	165	221	201
0	0	0	0
224	233	218	181
620	576	467	472
24	12	8	8
24	12	8	8
19	26	21	25
6293	5524	4784	4710
673	496	332	310
727	580	753	541
674	579	732	565
990	925	858	730
462	322	431	375
507	452	534	372
239	208	294	180
3	26	8	10
0	0	0	0
10524	10105	9015	9100
167	154	134	127
0	0	0	0
0	0	0	0
2454	2298	2610	2292
2	0	3	1
79	75	88	49
1	0	2	3
29	27	18	18
0	0	0	0
6	2	13	8
0	0	0	0
0	0	0	0
0	0	0	0
0	0	0	0
0	0	0	0
77	84	60	61
257	229	236	261
0	0	1	1
4	0	0	0
0	0	0	1
2	0	0	1
1	0	0	0
1	0	2	0
2	0	0	0
0	0	0	0
9	11	11	2
0	0	2	3
1572	1330	1399	1143
0	2	2	0
4	2	7	2
0	0	0	0
2	0	0	1
0	0	0	0
678	641	579	602
330	314	367	269
0	4	0	0
0	0	0	0
0	3	1	2
8	3	1	0
0	0	0	0
1047	960	1281	963
106	119	148	88
1014	1077	793	898
1744	1565	1391	1227
477	472	376	353
47	54	66	67
13	3	9	9
524	519	536	618
20	26	4	5
4	4	2	4
47	31	25	24
1318	957	660	793
14	5	14	6
427	364	219	247
0	4	1	0
23	14	10	12
0	0	0	0
0	0	0	0
0	0	4	1
9243	7857	10592	7047
614	697	995	947
402	406	844	622
1939	1715	1560	1676
69	14	33	15
0	1	0	0
2	4	2	1
14134	12384	12081	11546
242	197	193	206
870	529	579	474
2	7	5	0
30	12	9	14
11	0	8	6
2	5	5	3
86	98	107	65
3146	2619	3352	2397
398	341	462	274
6	2	4	0
6	2	4	0
5474	5286	5402	4822
5549	5327	5424	4841
0	2	1	0
0	0	0	1
336	307	296	284
735	629	676	531
2593	2243	2650	1908
1085	784	906	703
278	234	229	202
798	791	675	711
4	4	1	0
761	609	728	534
301	333	428	333
0	0	1	0
133	150	98	141
199	175	177	160
2	6	3	3
0	0	0	1
0	0	0	0
0	0	0	1
0	0	1	0
0	0	0	0
8604	7651	7393	6789
5	17	9	5
420	311	384	291
1388	1189	1185	1129
108	101	135	95
1095	1009	1256	934
1077	702	774	675
0	1	0	0
24	7	14	6
2	5	3	4
5177	5129	5578	4193
673	565	660	588
5881	5633	5607	5342
472	422	331	315
5136	4784	4157	4179
5101	3997	5062	3680
1	0	1	1
16	15	11	8
14	21	11	5
1248	1206	944	1249
11	2	4	2
0	1	0	1
4	2	0	0
0	0	0	0
11	4	5	2
26317	21688	20035	21775
367	434	324	392
463	498	380	423
7703	6305	5833	6373
78	83	66	39
282	221	216	215
74	75	64	35
2077	1661	1775	1608
12	14	12	19
16	14	4	8
382	270	376	334
0	0	0	0
0	0	0	0
0	0	0	0
298	301	398	335
2	2	1	0
21865	18004	19630	19415
5236	3860	4997	4773
0	0	0	0
14	8	12	11
4	4	1	0
3	0	1	2
5976	5735	4906	4828
12	4	8	2
5	6	9	3
2292	1950	1839	1741
1482	948	1143	819
10	14	4	14
14	4	7	10
2190	2091	2497	1983
14	10	8	10
396	396	291	303
24	35	27	17
67	88	80	75
2	2	1	2
17	6	4	3
10	35	12	14
25205	23965	20190	21296
13	7	13	9
7	6	7	6
3	0	2	1
47	53	20	23
0	2	2	1
0	0	0	0
126	141	141	99
154	101	172	88
447	432	596	471
2112	2031	2362	2402
1140	1109	810	1048
172	142	125	116
0	0	0	0
0	0	0	0
0	0	0	0
508	417	322	394
0	0	0	0
16632	15039	14574	14472
7	9	11	10
4075	3727	3320	2983
32507	27552	31204	26379
299	385	687	857
9	2	7	3
545	489	749	616
0	3	2	1
632	552	557	559
41	26	35	28
623	600	656	578
0	3	3	5
197	166	200	192
518	460	438	374
9	0	5	3
10	16	6	9
2	0	0	1
2	1	0	0
15	5	0	1
0	0	0	0
0	0	0	0
0	0	0	0
972	681	986	925
6459	3702	5115	1896
114359	103321	94095	92808
661	593	765	559
162	112	149	75
870	685	874	671
310	377	395	286
1934	1847	1381	1568
621	593	663	574
9	3	0	1
19	2	10	17
460	422	648	541
4790	3945	4084	3455
0	2	1	3
24	19	11	15
231	187	313	267
5623	5427	5009	4516
76	75	66	88
712	551	703	495
48	30	86	52
0	0	0	0
323	239	368	337
282	253	278	251
693	606	645	541
325	305	417	355
0	0	0	0
56	72	89	67
551	593	374	418
4	2	3	1
2	0	3	2
6	4	2	6
467	326	548	378
814	653	596	787
1191	1110	1110	1223
72	88	83	64
10	4	17	4
0	0	1	0
0	2	1	0
14	32	16	12
0	0	0	0
262	126	222	200
0	1	0	0
988	931	979	809
3373	2872	3551	2892
0	0	2	0
0	0	2	1
1	2	0	0
170	123	115	131
610	468	651	477
1091	913	1146	841
0	0	0	1
11	2	6	0
12	13	13	8
379	411	460	345
25	19	7	13
23	31	28	30
12	2	11	8
1682	1655	1245	1169
120	130	127	137
10935	10832	11311	9180
358	302	532	344
145	146	139	153
838	694	929	595
2	0	3	0
30	26	20	8
630	488	566	588
61	42	31	53
3569	3435	3168	2810
10273	8026	9693	8091
218	304	229	255
3780	3194	3507	2942
1190	963	1157	1035
0	0	0	0
72	48	70	77
1449	1098	1527	993
1211	1097	1089	997
2845	2568	2020	2706
21	21	9	19
868	733	702	678
949	787	792	716
36	16	35	36
211	168	268	228
3682	3384	3215	3276
2428	2204	1987	1888
115	49	90	36
2	7	13	13
1977	1874	1517	1178
2047	1707	1938	1766
307	266	222	268
2447	2259	1805	1538
15	5	8	5
4	2	0	1
1062	862	1154	928
72	52	93	87
5	2	5	7
814	693	828	673
4	0	0	0
563	419	533	354
292	244	238	203
4963	4814	4564	3993
1289	937	1164	1116
4	8	9	14
943	864	819	663
10443	10598	10097	8453
8	8	9	15
207	187	191	174
38	30	18	68
16	3	5	5
0	0	0	0
0	0	1	0
31170	26972	26820	24408
7	2	7	7
470	479	514	552
2841	2524	2931	2300
880	788	747	524
57	54	111	96
0	0	0	0
108442	93304	110813	100414
46	57	44	50
51	72	63	60
16	15	18	16
306	357	189	165
0	2	2	1
5	6	5	3
26	19	23	13
1426	1288	1280	1162
1296	1172	1083	900
984	852	871	884
655	644	664	544
734	654	644	496
304	319	430	379
0	2	0	0
0	0	0	0
1	0	6	2
1192	1222	775	894
1129	942	909	881
262	202	263	198
70	60	67	56
2	4	10	11
0	0	0	1
397	418	454	390
18	17	8	11
584	547	667	463
109	153	115	90
646	579	567	651
9716	8611	9786	8253
0	0	1	0
231	205	329	288
194	145	160	113
97	104	83	71
198	133	198	184
655	684	402	514
13	20	23	14
147	138	170	131
1054	894	930	727
2459	2315	1979	2213
25	25	19	19
5846	5395	6118	6127
2	4	3	3
2	0	0	0
0	0	0	0
0	0	0	0
0	0	1	2
0	2	0	0
0	0	0	0
0	0	0	0
0	0	0	1
0	0	0	0
464	446	397	456
1324	1249	1118	1310
2550	1992	1959	1316
208	146	134	82
451	357	468	376
796	668	779	615
251	266	302	253
3253	2881	2704	2355
293	251	204	202
0	0	0	0
437	396	486	362
1220	1206	1262	1103
2064	1704	1511	1305
0	0	0	0
0	0	0	0
2	1	1	0
1	0	0	0
14	15	14	9
1393	1137	1301	1160
1152	1118	1217	1173
479	356	386	309
1490	1309	1284	1166
17385	14933	17677	16518
5997	4637	3888	2454
4065	3093	2707	2036
4446	3624	4178	4038
677	443	566	410
0	0	0	0
144	148	117	145
1846	1698	1414	1726
143	142	108	133
16985	14797	12894	15156
130	104	97	93
126	100	94	86
100	85	99	76
45	36	3	2
2	4	0	0
3426	3402	3427	3679
94	87	58	77
285	230	274	246
1564	1262	1342	1150
0	2	8	4
6	4	6	4
65846	59494	63788	55036
10746	8566	10341	9472
110	63	103	95
8	2	1	0
0	0	0	0
15	15	0	3
0	0	0	0
0	0	0	0
284	234	393	293
124	88	77	64
123	71	144	118
0	0	0	1
183	211	149	151
1601	1294	1502	1027
34	25	24	19
2	0	0	1
70	70	61	53
9	2	4	5
1789	1748	1731	1755
211	203	152	200
4629	4160	4752	3921
694	624	587	520
151	143	95	90
1426	1275	1182	1026
120	85	99	58
2	4	1	0
2	0	7	6
732	789	844	835
193	163	177	160
412	313	403	335
7	11	26	24
1445	1286	1410	1182
5739	5131	6564	5637
671	538	656	644
0	2	2	0
4	0	1	0
6	6	1	1
4	4	0	0
17863	16064	13763	14201
334	290	280	282
246	223	298	238
414	314	466	342
115	114	112	94
1	0	0	0
345	350	368	371
4314	4378	3427	2482
500	453	410	408
443	479	377	555
982	914	1048	859
397	197	295	184
4	0	0	0
11	7	5	5
1	2	0	2
2	2	1	2
339	302	282	398
164	174	176	161
0	0	0	0
282	251	343	218
16	23	29	18
643	620	797	674
233	169	206	194
1594	1320	1681	1358
810	781	756	736
1	0	0	1
600	433	376	262
2	3	0	0
2261	1835	1803	1684
18	20	5	5
138	135	101	130
58	44	11	5
0	0	2	1
2	0	3	0
5099	4355	4313	4700
111	100	68	88
2	2	5	2
14613	11941	13275	10652
668	568	626	516
2923	2250	2158	1503
2	2	4	1
8	11	15	9
1	1	2	0
11	15	18	22
82	90	100	94
95	66	75	60
1441	1275	1770	1198
1924	1946	1776	2026
568	522	647	635
36	41	18	27
6	8	5	8
579	453	720	578
4340	3131	4193	3283
0	0	1	1
303	325	296	309
9014	9102	8566	6616
348	286	152	174
0	0	2	0
14	27	12	23
1346	1283	1233	1234
7218	7463	5603	5312
8842	8439	8463	6584
57	30	57	55
654	499	615	492
2	4	3	0
186	204	266	211
278	263	218	201
0	0	0	0
0	0	0	0
4	1	2	0
4	0	2	1
6	0	1	3
1457	1349	1897	1437
213	232	239	176
137	106	166	126
990	950	737	809
0	0	0	0
1328	1187	1169	1396
12	24	27	20
471	410	583	383
1583	1474	1510	1552
628	624	548	457
531	499	529	417
34	28	5	11
10	7	9	8
1675	1450	1782	1250
4	4	3	3
3077	2750	2434	2311
7	5	6	6
0	0	3	4
1272	1066	1344	1068
3	2	5	5
327	265	293	248
31	39	57	40
2	0	3	1
695	645	674	621
297	261	321	355
3924	3763	3917	4141
68680	64390	74230	65873
175	118	315	266
12	10	12	9
111	79	97	78
910	950	723	744
4443	3963	3706	3613
3304	3271	3350	2646
19	18	15	18
124	102	121	97
0	0	0	1
0	3	1	2
14	10	15	9
20597	19241	21621	23294
1206	990	720	682
1356	1371	1013	1231
1335	1243	1006	852
609	561	666	553
8246	7386	6395	7078
35	29	30	32
896	810	799	738
648	633	774	612
92	77	109	101
5653	4476	4567	3925
18	13	30	19
10	13	28	17
343	292	378	237
257	238	318	194
24	9	8	20
2	0	0	0
0	0	0	1
0	2	0	0
26	12	25	10
12	6	10	2
12	6	10	2
12	6	5	0
6	2	2	0
6	0	1	2
1433	1199	873	909
15780	16530	12154	11406
8	8	54	37
84	103	86	80
5182	4291	4245	4383
17440	15835	14258	15592
0	0	0	1
0	0	0	0
8	0	0	8
0	8	4	6
0	0	0	0
3	0	0	0
278	206	336	193
277	191	178	117
11	5	7	3
18	24	9	9
6	22	8	6
0	0	0	0
80	55	46	59
1210	1204	785	839
105	88	68	81
0	29	1	4
0	0	0	0
9	1	3	0
0	0	0	1
0	0	0	0
1170	929	939	740
4	1	3	0
0	0	0	0
0	0	0	0
2	2	0	1
1	0	2	3
2478	2383	2111	2202
58	46	48	38
86	74	109	104
37	24	56	27
25	12	19	14
1694	1512	1379	1303
1675	1672	1224	1204
395	288	244	244
0	0	0	0
1689	1479	1349	1410
305	239	387	244
9734	8863	9102	7829
182	197	275	247
167	180	251	232
6	12	5	4
12	6	14	8
18041	17098	14965	11024
78	67	39	31
2	0	0	0
0	2	6	4
0	0	0	0
336	368	385	381
8	13	10	3
2	2	3	7
2	2	4	8
11	18	19	19
4757	4448	3635	4113
6	4	7	3
269	237	245	252
274	268	294	261
4	5	2	2
48	5	15	15
85	115	124	127
4635	4327	3977	3141
0	0	0	0
225	218	250	186
1	0	0	0
266	265	213	141
2428	2211	1688	1936
3189	2495	2902	2190
1939	1763	1784	1466
346	322	252	248
178	164	127	126
3384	2976	3616	2390
0	0	0	1
0	0	0	0
30	7	11	6
120	80	88	48
153	162	154	126
2560	2460	2175	2104
0	0	0	0
0	0	0	0
3	0	2	1
363	333	391	332
7	7	11	8
0	0	0	1
116	84	118	82
365	351	379	348
9	13	8	9
2515	2309	1940	2046
5347	4901	4139	2962
946	865	888	643
49	61	73	39
1240	1061	1196	1108
114	111	91	38
20	24	4	12
857	764	799	805
2201	1733	1889	1629
228	222	195	198
0	1	6	4
1289	1155	1433	1106
0	0	0	0
16	19	17	24
0	0	0	1
4	9	1	4
5	9	3	6
58	25	31	20
0	0	7	9
4	2	65	43
0	4	0	1
31	31	25	33
7418	7440	6559	6529
891	744	930	846
1109	890	1176	1098
7	0	4	0
4	2	9	8
0	0	0	0
66	61	63	47
4	7	2	2
10	6	3	0
0	0	1	0
908	807	1194	815
1132	1024	1371	980
0	0	0	0
20	20	10	5
1601	1611	1584	1830
0	0	2	1
1	0	0	0
48	55	54	44
14	4	12	5
19	4	14	5
0	0	0	0
1950	1809	2239	1772
47	34	57	38
2141	2261	2893	2441
8	18	10	22
5	17	10	18
300	244	536	340
10	14	14	12
0	0	2	4
4	1	4	2
6	8	10	8
4573	4318	4388	4544
2	3	1	1
118	83	112	68
81	83	95	76
227	171	190	191
301	259	445	332
5	0	1	1
0	0	0	0
193	221	201	191
1137	1038	1361	1165
839	832	815	824
16	6	1	1
0	0	0	0
2432	1984	2681	1612
0	2	1	0
0	4	14	14
0	0	0	0
231	210	204	227
11922	11738	10612	9270
0	0	0	0
0	0	0	0
2465	2389	2451	1969
1936	1892	2171	1741
0	0	0	1
2136	2022	2504	2146
449	308	508	341
1760	1484	2046	1560
2	0	2	3
5036	4498	7040	4922
76	73	58	69
1316	1187	1568	1143
63	90	106	91
1876	1810	1747	1344
4310	4045	4379	3228
123	85	120	74
350	264	418	370
548	417	476	341
549	421	481	339
0	0	3	0
4092	3489	4283	4137
26	18	43	30
896	807	677	680
12435	10643	9651	8062
619	588	441	455
27	29	27	29
1025	872	757	771
2059	1662	1676	1585
11	5	9	8
509	420	585	384
1571	1348	1529	1291
76	101	73	58
12	12	9	11
1061	1023	1006	1035
14	12	6	2
14	12	6	2
1421	1299	1349	1126
328	280	263	384
164	162	239	206
62	29	50	38
17	5	13	10
74	36	46	49
2	4	3	4
176	192	240	153
10	10	10	11
692	652	834	711
3660	2936	2664	2338
14132	13455	13006	12497
257	287	175	243
14500	14323	11966	10900
143	167	69	78
729	745	563	554
0	0	0	0
0	0	0	5
0	0	0	0
0	0	0	0
0	0	0	0
0	4	0	1
999	1118	960	922
0	0	0	0
0	0	0	0
2	0	0	1
0	0	0	0
0	0	0	0
2	1	0	2
2	0	1	1
0	0	0	0
0	0	0	0
2	2	0	0
15	2	9	0
1	2	2	1
0	0	14	9
0	0	0	0
231	189	245	176
110	99	156	97
0	3	0	0
298	275	304	290
2	1	3	1
1257	1082	1232	912
0	0	1	0
0	0	1	0
443	400	532	430
0	3	2	0
100	87	75	68
513	554	689	647
4505	4152	4688	4455
51	30	35	31
0	2	0	0
1834	1546	1719	1288
1071	618	1021	562
0	0	0	0
4884	4373	6002	4714
14	42	25	19
26	21	29	21
0	0	0	0
0	2	1	0
0	0	0	1
2	0	1	1
40	34	78	56
0	2	2	0
66	69	64	54
346	338	282	318
1616	1429	1944	1756
415	321	520	446
0	2	2	1
560	442	510	512
173	153	184	154
5	5	8	4
4	5	4	7
0	4	0	1
0	0	0	0
0	0	0	0
97	61	86	89
77	45	59	70
43553	41825	52587	45529
214	146	149	101
303	206	242	189
0	0	1	4
0	2	0	0
2171	1877	2084	1623
270	195	211	213
203	101	205	143
0	6	3	2
183	134	145	105
2836	2171	2149	2009
4	3	6	1
197	161	215	287
1571	1353	2091	1471
217	181	190	132
180	145	269	261
0	2	1	1
461	418	435	355
4616	3809	4942	3107
8	6	22	19
8	6	22	20
614	537	605	555
810	635	901	768
426	274	224	162
0	0	0	0
83	77	78	58
0	0	0	0
160	112	88	68
0	0	0	0
0	0	0	0
0	4	7	12
0	0	0	0
16496	15286	21697	19313
28	30	31	33
28	30	31	33
0	0	7	3
0	0	4	1
487	433	587	472
12	6	27	17
82	54	87	79
2	2	1	1
10	6	0	1
8	0	0	4
932	813	829	663
8	14	11	8
5	6	1	2
0	2	0	0
0	0	0	0
0	1	0	1
7888	6571	7594	6301
36	16	28	16
3	2	3	1
704	363	815	558
19	14	15	16
2	0	1	0
5	5	1	2
2	0	2	0
2	0	2	0
0	0	4	4
25109	23271	26492	26627
51	36	71	52
5	2	1	1
351	259	368	365
264	348	365	379
2680	2795	2908	2299
600	705	749	485
276	226	252	229
1999	1637	1946	1504
1082	927	924	1054
39	44	42	38
394	314	505	412
81315	80263	70793	70976
33607	33789	27219	25596
2733	2579	1533	1658
0	0	0	1
5	2	19	4
5171	4497	5695	4523
15	18	6	12
5427	4805	6375	4631
0	1	0	0
6	6	6	4
5	12	7	4
7665	6691	6707	6190
244	216	122	96
21325	19418	19291	17742
1599	1547	1397	1197
709	581	645	638
488	414	523	490
1	4	13	3
3	4	13	4
889	753	1041	727
4	8	11	7
347	423	376	394
564	594	526	544
110	78	88	58
155	143	217	199
7232	6793	7320	7509
888	624	1139	885
261	275	317	244
4678	3263	486	291
14	8	25	14
4	0	2	2
6489	5636	5416	5200
332	264	298	261
3679	2997	3048	2903
0	7	2	1
2	0	0	0
372	313	411	343
0	0	0	0
0	0	0	0
0	0	0	1
0	0	0	0
0	0	4	1
12	8	10	3
2	0	0	0
2	0	1	1
0	0	0	0
0	0	0	0
0	2	0	0
0	0	1	0
10	9	11	12
3	8	10	7
2	0	0	0
7278	5999	6908	5901
0	0	0	0
426	385	539	453
473	440	469	466
9	6	2	4
0	0	0	0
13	15	19	5
0	0	0	0
0	0	0	0
0	0	0	0
0	0	0	0
104	98	125	98
18529	15329	14019	11959
69	71	74	85
4484	4393	3843	3420
0	0	1	3
2	6	2	4
0	0	0	0
13	9	8	5
470	369	487	330
32	13	14	11
4	4	1	3
1	2	0	1
0	0	0	0
0	0	0	0
0	2	0	1
0	0	0	0
14	14	29	6
10	4	8	2
0	2	1	0
155	169	148	143
2608	2360	1957	1934
0	4	0	1
5035	4496	4218	4286
2	5	4	4
77	67	74	76
1632	1436	1750	1303
2278	2173	2392	1840
0	0	0	0
1	1	0	1
12	11	6	11
0	2	1	0
13	12	5	6
0	0	0	0
0	0	0	0
0	4	9	4
0	0	0	0
2	1	8	3
2010	1907	1865	1392
10	7	7	10
242	225	209	184
1767	1469	1763	1651
2288	1995	2495	2220
28	19	31	39
265	240	337	277
11	9	12	13
25085	21870	28050	22805
74	62	152	129
1	2	0	1
2	2	3	2
285	236	409	289
17652	15978	13430	13469
189	153	105	127
24	10	6	5
288	234	306	267
670	493	669	461
2655	2224	3048	1971
2	0	3	1
0	0	0	0
0	0	1	0
299	225	305	270
2272	1933	1858	2038
0	2	2	1
274	248	194	180
1649	1424	1867	1194
24	15	84	33
8	5	28	11
0	0	0	0
0	0	0	0
0	0	0	0
0	0	0	0
645	622	808	714
4165	4294	4087	3729
1353	1391	1429	1279
4476	4547	4119	3742
9	6	10	8
13	1	8	5
237	179	193	195
290	218	233	242
0	0	0	1
0	0	0	0
0	0	4	1
511	438	611	498
2231	2085	2554	2321
87	69	77	48
25	17	43	45
69	42	88	74
1045	863	1196	915
0	4	3	4
3346	3040	3546	3508
60	50	50	46
288	275	376	277
797	721	757	736
46	41	51	44
1215	1194	1174	1205
16	4	13	11
10	8	8	14
310	245	342	265
434	370	347	387
958	736	755	516
1017	764	781	540
1021	768	788	544
876	995	992	992
1123	910	1181	804
227	171	196	122
2	6	5	1
7	2	10	5
0	1	3	2
235	208	245	232
2053	1701	1865	1611
10	16	13	3
526	424	467	388
5149	4887	4323	4449
32	39	41	61
204	188	220	170
0	0	0	0
44205	39384	38443	38793
344	440	238	294
8799	7083	8311	6862
48412	42923	43050	38623
1940	1647	2215	1649
1236	1081	1182	1164
8672	8294	11795	13460
10917	9981	9286	11853
404	342	326	291
65	38	72	67
35	33	18	39
4	5	1	2
10	16	13	3
552	419	392	450
831	769	807	761
87	71	64	66
31	25	22	38
104	75	73	86
987	871	709	608
190	149	136	133
1753	1572	1577	1448
424	392	417	428
0	4	3	0
135	142	132	143
227	220	272	223
948	865	1012	885
3	2	1	1
42778	35690	36160	30530
0	0	1	0
6	12	3	5
517	449	378	403
1470	1210	1332	1140
460	402	269	322
5580	4012	5731	5092
2	3	3	4
671	551	731	570
237	159	193	129
36	38	36	34
5051	4787	4399	3776
852	797	916	735
0	0	0	0
20	24	40	15
14	12	26	9
1002	769	917	955
1861	1620	1838	1340
0	0	0	0
0	0	0	0
0	0	0	0
5	6	2	2
107	68	97	28
2733	2288	2126	1764
4106	3686	3832	2843
224	195	213	179
4	1	2	1
406	348	415	313
79	46	59	49
4	1	1	1
404	336	448	315
14	15	7	9
13	12	13	8
2350	2315	2521	1693
335	313	233	252
1152	949	1192	848
65	48	79	71
1471	1404	1210	1267
977	772	664	472
291	256	211	223
15	24	7	10
8931	7305	8298	6434
327	329	297	247
50	11	27	14
0	0	0	0
4	3	3	3
552	587	453	428
1480	1413	1572	1180
2558	2485	1830	2067
0	0	1	0
0	2	0	0
0	2	0	0
1251	1125	1322	957
2503	2355	2507	2070
4	8	13	4
0	0	2	3
1615	1268	1820	1320
203	207	232	169
238	229	253	180
0	0	0	0
0	0	0	0
0	0	0	0
0	0	0	0
0	0	0	0
0	0	0	1
0	0	0	0
171	137	165	128
1089	1079	993	932
11	23	11	15
5	2	8	3
997	804	985	671
867	923	659	743
937	928	857	862
8	5	8	6
0	0	2	1
205	178	233	168
62	67	84	85
5	4	4	2
91	73	100	106
490	378	480	355
60	55	56	33
7	5	6	4
2	4	0	1
1	2	5	1
560	448	587	469
458	427	534	354
2737	2475	2927	2818
2068	1792	1741	1677
603	543	531	410
2987	2248	3235	2418
1	1	1	1
4	0	0	1
0	0	0	0
0	0	0	0
1	0	0	0
0	0	0	0
0	0	0	0
2	0	7	2
432	339	418	319
31158	31111	28073	23619
61	56	66	68
8	12	7	4
0	0	1	0
787	530	807	565
72	30	63	16
62	46	48	37
138	143	136	107
676	558	569	554
168	127	187	155
0	0	0	0
0	0	0	0
424	313	368	236
76	58	71	39
0	0	0	0
308	328	312	260
172	124	136	113
883	800	786	857
947	904	1089	953
797	748	769	703
44634	41218	48832	38156
150	90	172	134
338	266	320	256
3	4	0	1
4	2	5	1
6	5	7	8
54821	50947	57115	46510
12	9	9	6
1452	1281	1252	1121
38	73	81	69
14	11	23	5
1831	1516	1850	1624
413	363	532	382
133	96	150	123
81	61	51	59
1314	1232	1279	1320
209	192	205	171
2	1	6	5
633	506	506	519
0	0	1	0
0	0	1	0
21	24	36	12
851	662	823	462
1	0	0	0
0	0	0	0
0	0	0	0
2	0	0	0
949	1020	1139	918
0	0	1	0
200	157	200	189
219	181	253	305
0	0	0	5
0	0	0	0
0	0	0	0
710	508	617	432
2	0	1	2
704	537	675	589
398	318	320	243
112	151	138	104
33	21	25	27
287	225	229	263
153	110	125	133
57	40	48	29
73	55	60	52
15196	14625	15026	13324
22	19	17	24
3	9	5	5
2	6	4	3
84	64	138	62
496	443	539	374
28	14	17	23
1945	1899	1909	1770
220	228	182	154
3	3	4	4
2992	2718	3282	3025
830	795	754	764
242	223	259	214
675	683	714	768
136	129	128	139
2018	1819	2135	1657
4	8	10	9
339	296	382	288
59	64	38	39
17	16	13	10
54	51	58	28
3	0	2	1
4220	4046	4830	3290
622	682	1032	739
534	655	967	710
2027	1759	2340	1796
12549	12649	17706	10892
51	54	49	50
291	271	355	347
895	835	962	857
31	28	31	24
2303	1742	2161	1931
5	1	9	3
12440	11381	12099	9627
316	319	330	264
1	1	1	3
21	43	56	47
13243	11558	12181	11224
1726	1490	1838	1375
1963	1852	1707	1687
168	129	167	125
1801	1794	1470	1478
587	543	638	552
15	16	26	26
3722	2778	3734	2450
66	75	67	59
0	1	0	0
0	0	1	1
997	821	1089	761
111	95	110	92
126	108	140	93
9916	8256	7706	6143
0	0	1	0
0	2	2	2
3147	2664	3478	2341
27	29	32	25
1360	1380	2032	1723
294	314	402	314
365	343	413	314
444	466	510	501
52	90	91	67
69	64	100	62
968	781	1180	859
565	555	614	561
13766	13340	11364	9340
0	3	0	2
2531	1845	2795	1647
4	0	5	0
122	77	150	116
12	12	21	17
2174	2227	2224	1808
5408	4692	4965	4548
0	3	1	0
0	0	0	0
1792	1444	1492	1535
716	653	653	701
2	4	9	8
99	88	92	45
162	115	114	104
5437	5177	4230	3757
1679	1560	1629	1476
0	5	4	3
348	311	402	394
11513	9185	13154	10711
6603	5390	7681	6223
0	0	0	0
0	0	0	0
481	461	400	386
221	226	189	200
296	269	233	208
122	98	91	61
636	578	748	586
341	309	299	258
528	450	481	437
340	367	352	293
408	299	407	268
6	4	12	9
67	56	40	32
252	187	222	268
69	36	35	27
28	12	19	11
0	0	1	1
6	1	1	0
0	0	0	0
2	2	1	0
151	114	208	93
0	0	0	0
4	4	1	0
285	287	194	201
2	5	9	3
18	7	19	15
2998	2267	2580	1752
44	45	36	42
0	0	0	0
78	67	112	76
1410	1393	1478	1351
10	6	8	5
2	0	2	1
6	0	6	1
22	0	15	16
0	0	0	1
0	0	0	0
366	321	386	322
4868	4582	5145	3763
41	30	59	45
3428	3732	3396	3443
144	152	130	141
340	212	332	233
0	0	0	0
0	1	0	0
0	0	1	0
1526	1516	1450	1399
58	52	53	69
520	519	487	573
848	644	935	667
260	262	256	238
5	2	4	4
0	0	0	0
0	0	0	0
0	0	0	0
0	0	0	0
0	0	0	0
0	0	0	0
0	0	0	0
0	0	0	0
0	0	0	0
0	0	0	0
2	0	0	0
412	371	512	410
0	2	1	0
2209	1769	2442	1746
7	1	5	1
27983	25754	23522	20526
102	87	75	42
1270	1051	1302	1045
32	34	39	16
9	8	9	3
0	0	0	0
12016	10474	9250	8392
662	702	496	512
3032	2394	2356	2222
4	6	5	14
0	0	0	0
8218	6883	6986	6878
289	231	250	229
234	178	259	218
473	403	393	486
1728	1211	885	282
1349	991	791	250
647	544	644	656
142	120	97	111
712	589	848	770
3520	3140	2935	2691
204	202	183	218
0	0	0	0
3026	3010	3194	2755
3	8	2	2
1913	1690	2702	1993
470	377	576	439
7693	7490	7038	6526
2	0	3	0
0	0	0	1
0	1	0	0
30	28	20	23
252	196	248	220
21	30	22	24
1874	1742	2280	1856
107	112	113	105
1259	940	1406	922
1160	986	1365	1146
8	12	13	12
132	103	148	138
281	239	243	257
14	9	23	10
467	382	675	630
995	813	819	903
10686	9726	12506	11172
60	41	26	14
0	2	2	0
1063	803	1036	816
146	124	184	116
204	151	188	157
0	0	0	0
1	0	2	2
2509	2244	2572	2100
1287	1119	1397	1032
145	122	146	111
228	211	253	192
236	172	257	237
2528	2234	2212	1852
5	1	4	3
10	0	4	6
0	0	0	1
4	0	0	0
14374	12292	14629	11119
1104	1102	1193	1250
414	423	365	409
394	335	448	309
114	123	125	81
50	53	55	35
188	101	210	168
2	0	1	11
569	516	683	585
419	410	424	300
2072	2068	2170	1874
44	49	98	30
0	0	0	0
0	0	0	0
5	6	2	2
79	69	51	38
9713	8669	7795	6315
1843	1937	1623	1505
609	601	590	509
249	215	226	156
26	20	37	19
1363	1092	1365	821
2770	2193	3285	2432
234	216	240	187
2	3	2	9
1530	1193	1678	1209
379	317	290	266
298	254	221	200
799	719	818	666
281	345	353	288
23	25	29	31
0	0	0	0
1134	1105	1105	940
951	755	1109	829
1680	1566	1850	1883
28	13	40	57
0	0	1	0
4642	3968	5742	4441
182	142	226	136
0	0	0	0
1056	942	765	959
429	396	311	349
1505	1432	1488	1321
4002	4298	3022	2722
23	25	20	15
0	4	0	2
940	855	1077	919
5874	4949	5323	4897
6	10	9	12
14	5	6	2
281	322	450	422
260	290	392	384
15	18	15	6
86	66	149	110
423	348	299	266
22	16	16	14
0	0	0	0
0	4	7	2
0	0	0	0
0	0	0	0
0	0	0	0
0	0	0	0
0	0	0	0
0	0	0	0
1625	1421	1646	1122
0	0	0	0
363	296	391	299
421	360	496	563
0	0	0	0
671	663	1040	960
1263	1399	1030	975
1344	1571	1309	1212
475	440	411	364
0	0	0	0
42	8	22	22
2	0	0	0
0	0	0	0
840	684	1170	720
6208	5554	9419	6301
116	111	204	100
2	0	0	2
2	3	3	1
68845	59574	72851	68102
4196	3712	5759	4316
1886	1787	2437	1964
47	36	66	48
80864	71815	68371	57278
7	11	16	14
90	78	81	73
0	0	0	1
0	0	1	1
19	14	13	21
13	16	19	11
0	0	0	0
4226	3793	2951	2916
0	5	5	1
156	152	127	118
12	8	12	6
93	96	42	61
3199	2995	2476	2239
36	20	23	15
36	20	23	15
36	20	23	15
3593	3566	2921	2488
[truncated: 15,606 more rows]
