# Supplementary material for: Differential expression analysis for sequence count data
Source: Genome Biol. 2010 Oct 27;11(10):R106. doi: 10.1186/gb-2010-11-10-r106 (PMC3218662; doi:10.1186/gb-2010-11-10-r106)
Supplement: Additional file 3 — Raw data. Tarball containing the raw data for the presented analyses. [file gb-2010-11-10-r106-S3.TGZ › suppl_data/NeuralStemCellData.tab]

Gene	GliNS1	G144	G166	G179	CB541	CB660
13CDNA73	4	0	6	1	0	5
15E1.2	75	74	222	458	215	167
182-FIP	118	127	555	231	334	114
2'-PDE	39	38	98	127	34	40
3'HEXO	18	20	76	111	121	112
3.8-1	0	0	1	0	0	0
384D8-2	3	3	4	4	3	3
76P	61	51	129	108	358	232
7h3	4	0	3	0	9	2
8D6A	1	1	1	0	0	0
A1BG	1	0	0	0	0	0
A2BP1	19	18	20	7	1	8
A2M	2724	2209	13	49	193	548
A4GALT	0	0	48	0	0	0
A4GNT	0	0	0	0	0	1
AAA1	2	0	0	0	0	0
AAAS	57	29	224	49	202	92
AACS	1904	1294	5073	5365	3737	3511
AADACL1	3	13	239	683	158	40
AADAT	18	5	36	24	22	36
AAK1	2	0	5	2	0	3
AAMP	215	170	397	383	512	384
AANAT	0	0	3	0	0	0
AARS	157	105	600	183	111	28
AARSD1	27	48	127	122	112	29
AARSL	21	10	68	11	55	22
AASDH	15	5	40	47	18	20
AASDHPPT	162	128	299	543	888	374
AASS	159	101	107	145	130	39
AATF	68	40	208	36	100	66
AATK	3	0	1	0	0	0
ABAT	493	838	79	281	8467	1515
ABC1	7	13	15	24	34	5
ABCA1	23	13	16	27	11	25
ABCA10	1	0	0	6	6	7
ABCA11	10	1	393	73	10	12
ABCA12	3	0	2	0	14	1
ABCA13	0	0	305	30	180	24
ABCA2	38	5	47	1	20	8
ABCA3	95	91	102	166	250	60
ABCA4	0	0	12	0	0	26
ABCA5	1	2	49	51	181	54
ABCA6	0	1	5	7	30	1
ABCA7	23	7	23	6	1	4
ABCA8	98	76	1	1	9	27
ABCA9	155	133	289	317	302	147
ABCB1	0	0	1	2	1	2
ABCB10	64	41	226	169	71	120
ABCB11	0	0	1	0	1	0
ABCB4	51	28	23	0	7	4
ABCB5	2	0	1	1	1	0
ABCB6	26	17	38	69	26	35
ABCB7	34	47	209	51	34	43
ABCB8	84	53	67	28	82	15
ABCB9	12	6	76	11	36	43
ABCC1	24	31	149	127	21	73
ABCC10	17	16	37	7	19	17
ABCC11	4	0	14	27	11	22
ABCC12	0	0	3	0	1	1
ABCC13	4	5	10	3	2	7
ABCC2	1	0	1	0	46	10
ABCC3	4	3	79	301	57	14
ABCC4	17	24	26	57	73	114
ABCC5	41	15	44	38	28	27
ABCC6	27	8	64	44	7	26
ABCC8	29	13	4	0	0	2
ABCC9	4	2	2	6	25	17
ABCD1	9	19	50	13	13	14
ABCD2	2	0	0	0	13	0
ABCD3	147	147	209	86	261	119
ABCD4	44	71	78	598	208	101
ABCE1	490	378	1780	790	567	813
ABCF1	68	39	151	32	58	89
ABCF2	42	42	113	36	90	20
ABCF3	35	29	43	32	21	15
ABCG1	1	5	23	0	3	4
ABCG2	48	29	14	19	10	1
ABCG4	0	0	1	0	0	0
ABHD1	0	1	4	1	3	3
ABHD10	6	14	21	16	6	3
ABHD11	1804	1182	3102	676	1161	1143
ABHD14A	44	37	72	8	219	126
ABHD14B	18	10	73	7	16	22
ABHD2	85	79	182	35	149	62
ABHD3	133	95	445	343	406	143
ABHD4	114	82	250	210	253	158
ABHD5	34	31	130	68	90	21
ABHD6	62	204	183	394	315	160
ABHD7	0	0	67	0	49	17
ABHD8	49	6	95	0	32	30
ABI1	275	199	242	257	510	164
ABI2	195	200	266	247	413	237
ABI3	0	0	0	0	0	1
ABI3BP	3	4	74	145	14	14
ABL1	112	67	152	94	223	144
ABL2	25	14	240	45	36	13
ABLIM1	70	50	78	13	197	134
ABLIM2	0	1	1	8	25	7
ABLIM3	1	0	2	15	0	8
ABO	0	1	2	1	0	0
ABR	199	158	207	1137	538	460
ABRA	0	0	0	0	0	1
ABT1	51	31	157	25	48	42
ABTB1	11	12	27	10	11	18
ABTB2	19	9	21	12	94	33
ACAA1	34	52	66	104	120	88
ACAA2	144	109	62	156	134	189
ACACA	47	67	109	173	183	50
ACACB	2	2	7	1	9	7
ACAD10	36	19	66	1	33	22
ACAD11	109	70	131	17	61	26
ACAD8	22	43	26	56	33	28
ACAD9	116	53	376	256	228	133
ACADL	1	0	5	2	6	3
ACADM	69	67	95	2	55	65
ACADS	37	21	101	50	63	19
ACADSB	36	51	51	82	107	39
ACADVL	200	86	139	35	179	153
ACAS2	9	12	88	44	8	11
ACAS2L	3	2	9	8	1	1
ACAT1	111	141	487	195	288	112
ACAT2	165	153	360	25	88	138
ACATE2	12	19	96	41	74	37
ACBD3	213	169	351	692	866	192
ACBD4	4	0	12	2	1	1
ACBD5	14	21	50	5	38	23
ACBD6	130	167	334	123	112	159
ACBD7	6	1	15	9	22	30
ACCN2	20	14	57	40	10	17
ACCN3	11	6	9	28	3	3
ACCN4	1	0	0	0	0	0
ACD	9	3	69	117	28	52
ACDC	2	0	3	17	10	5
ACE	0	0	0	1	0	0
ACF	25	12	90	45	54	81
ACHE	199	75	4	37	15	2
ACIN1	44	0	186	0	3	3
ACLY	313	431	477	234	497	308
ACMSD	6	9	2	0	7	9
ACN9	133	128	159	399	114	169
ACO1	70	42	114	124	134	158
ACO2	348	309	735	1552	770	784
ACOT2	19	9	11	28	0	6
ACOT4	1	0	45	0	0	4
ACOT7	192	128	475	208	266	104
ACOT8	2	0	41	0	8	4
ACOT9	15	11	88	16	19	14
ACOX1	97	71	225	123	277	104
ACOX2	2	4	47	66	300	25
ACOX3	4	4	9	5	8	9
ACOXL	0	0	0	1	0	0
ACP1	239	303	864	942	1384	1587
ACP2	42	26	62	25	80	68
ACP5	0	1	0	0	0	0
ACP6	241	125	198	361	172	128
ACPL2	55	71	146	136	101	91
ACPP	7	5	6	6	4	7
ACR	0	0	3	0	13	4
ACRBP	0	0	2	2	0	2
ACRC	3	10	31	13	14	5
ACRV1	0	2	1	0	0	0
ACSBG1	7	4	0	2	52	5
ACSL1	5	3	230	77	14	11
ACSL3	440	521	795	1546	2158	413
ACSL4	63	68	410	126	66	78
ACSL5	2	2	6	52	21	4
ACSL6	19	46	3	1	0	0
ACSM2	0	4	2	0	0	3
ACSM3	1	0	12	0	10	3
ACSS1	91	26	72	48	15	73
ACSS2	55	30	147	18	83	47
ACTA1	74	28	113	10	65	64
ACTA2	0	0	160	182	824	358
ACTB	26071	16535	40825	11099	25909	45424
ACTC	1	0	0	0	0	477
ACTG1	2667	1349	10797	1712	14476	6785
ACTG2	26	23	44	29	3	228
ACTL6A	58	38	392	78	198	126
ACTL6B	0	2	0	0	0	1
ACTL8	0	0	0	1	1	0
ACTN1	463	669	3940	7604	4575	1482
ACTN2	12	30	0	0	0	10
ACTN4	3028	4178	6299	8247	7378	2673
ACTR10	77	61	115	30	33	33
ACTR1A	234	55	222	18	159	56
ACTR1B	18	3	63	1	40	10
ACTR2	3044	4056	3384	3964	8300	2469
ACTR3	319	264	464	830	584	379
ACTR3B	2	1	1	1	0	0
ACTR5	13	16	29	20	17	5
ACTR6	162	218	573	21	65	108
ACTR8	64	78	189	289	176	90
ACTRT1	0	0	0	1	0	0
ACVR1	7	3	6	31	0	3
ACVR1B	17	11	33	6	6	1
ACVR1C	0	0	1	0	0	0
ACVR2	14	21	38	41	43	76
ACVR2A	3	4	8	21	22	10
ACVR2B	2	0	10	3	6	3
ACVRL1	0	2	0	0	0	1
ACY1	10	21	60	3	17	19
ACY1L2	46	58	416	253	93	104
ACY3	0	0	0	3	0	0
ACYP1	59	61	487	155	69	72
ACYP2	58	81	224	240	282	280
AD-003	1	2	3	0	0	0
AD-020	9	4	63	24	19	9
AD023	0	0	27	30	1	3
AD031	51	36	16	48	32	64
AD7C-NTP	3	0	8	3	6	4
ADA	1889	1274	5042	5311	3713	3474
ADAL	0	1	2	0	12	5
ADAM10	251	188	278	403	638	270
ADAM11	9	7	0	1	1	0
ADAM12	932	333	110	144	191	66
ADAM15	74	40	374	76	58	72
ADAM17	101	69	214	560	283	100
ADAM18	0	0	0	0	2	1
ADAM19	118	100	879	142	555	264
ADAM20	0	0	0	5	0	0
ADAM21	6	4	4	0	0	0
ADAM22	264	238	19	116	254	56
ADAM23	66	48	41	61	59	29
ADAM28	0	0	1	0	0	3
ADAM32	0	0	2	0	12	2
ADAM33	35	11	49	12	22	28
ADAM8	0	1	12	7	2	3
ADAM9	581	411	1590	2589	3047	1423
ADAMDEC1	0	0	1	0	0	0
ADAMTS1	61	192	78	94	0	37
ADAMTS10	58	28	18	2	175	150
ADAMTS12	22	9	65	4	89	32
ADAMTS13	3	2	8	32	1	15
ADAMTS15	19	4	32	44	163	17
ADAMTS16	16	10	38	10	8	11
ADAMTS17	1	0	0	1	0	3
ADAMTS18	0	0	0	3	0	17
ADAMTS19	0	2	0	11	0	15
ADAMTS2	2	10	7	0	21	20
ADAMTS20	0	0	1	0	0	0
ADAMTS3	147	122	6	0	515	103
ADAMTS4	23	21	6	78	0	3
ADAMTS5	43	25	1	9	7	11
ADAMTS6	31	36	31	86	46	59
ADAMTS7	2	0	0	0	0	1
ADAMTS8	0	0	0	0	0	3
ADAMTS9	321	206	174	223	281	127
ADAMTSL1	6	2	137	37	19	23
ADAMTSL2	0	0	3	0	0	0
ADAMTSL3	0	0	0	0	1	1
ADAMTSL4	1	2	28	19	4	14
ADAR	53	42	220	96	96	75
ADARB1	7	5	93	28	44	27
ADARB2	0	0	0	1	0	2
ADAT1	38	15	34	6	17	18
ADC	0	0	7	12	7	2
ADCK1	28	10	13	5	21	9
ADCK2	11	2	81	23	8	33
ADCK4	106	87	78	21	84	61
ADCK5	4	5	10	2	12	8
ADCY1	186	158	148	59	63	30
ADCY2	0	0	1	0	23	13
ADCY3	14	15	108	166	27	46
ADCY5	9	7	1	0	1	36
ADCY6	182	78	257	519	376	599
ADCY7	19	9	43	98	44	49
ADCY8	0	0	0	7	0	0
ADCY9	21	11	36	43	41	12
ADCYAP1	0	0	2	0	0	7
ADCYAP1R1	3	4	0	1	127	6
ADD1	322	196	557	808	1109	898
ADD2	48	52	178	339	0	5
ADD3	448	581	380	400	680	630
ADFP	31	24	20	77	85	73
ADH1B	0	0	1	0	1	1
ADH1C	0	0	0	0	0	2
ADH4	3	0	0	0	6	8
ADH5	490	389	882	612	1368	928
ADHFE1	5	5	16	26	35	17
ADI1	181	170	262	204	213	63
ADIPOR1	102	71	304	123	208	211
ADIPOR2	26	12	74	40	31	36
ADK	135	153	476	287	195	117
ADM	78	40	186	215	323	99
ADM2	0	0	7	0	0	1
ADMP	0	0	1	10	0	3
ADMR	2386	2037	6339	8582	5108	6236
ADNP	253	246	578	615	961	515
ADORA1	3	11	17	132	27	35
ADORA2A	1	0	6	30	43	18
ADORA2B	7	1	158	42	2	12
ADPGK	2019	1928	6988	4998	3996	5000
ADPN	7	2	13	4	4	3
ADPRH	2	3	8	0	0	0
ADPRHL1	0	4	1	0	0	9
ADPRHL2	31	16	251	77	86	67
ADRA1A	0	0	0	0	0	3
ADRA1B	0	0	111	1	0	1
ADRA1D	1	0	10	2	0	1
ADRA2A	39	66	0	0	0	0
ADRA2B	0	0	0	0	1	0
ADRB1	11	6	39	12	11	26
ADRB2	0	2	0	4	0	1
ADRB3	17	17	57	10	17	8
ADRBK1	51	9	51	11	88	47
ADRBK2	4	5	1	18	14	20
ADRM1	189	150	837	204	405	226
ADSL	96	99	180	112	188	241
ADSS	165	166	835	386	526	258
ADSSL1	0	2	27	9	10	23
AE2	6	15	27	30	23	4
AEBP1	1856	1063	5913	4799	3115	3446
AEBP2	144	109	585	320	468	295
AEGP	3	0	1	9	25	20
AER61	3	14	22	11	2	3
AES	1381	864	876	292	1972	596
AF15Q14	1	0	5	0	1	2
AF1Q	24	26	52	45	84	32
AF5Q31	244	106	558	395	574	458
AFAP	139	104	94	480	84	63
AFAR3	6	6	6	11	15	9
AFF1	19	15	62	132	69	30
AFF2	0	1	0	0	8	1
AFF3	7	5	7	70	1	17
AFF4	1	1	0	6	0	0
AFG3L1	5	7	52	19	25	24
AFG3L2	107	74	200	88	94	107
AFMID	92	112	372	232	293	226
AFP	0	0	2	4	22	4
AFTIPHILIN	81	66	150	309	144	49
AG1	6	2	23	1	2	8
AGA	19	17	138	159	133	53
AGBL2	1	0	3	6	0	0
AGBL3	2	0	0	0	0	2
AGC1	8	2	0	0	0	0
AGER	4	3	23	0	3	4
AGGF1	52	35	174	130	184	100
AGL	71	13	127	209	374	169
AGMAT	5	5	13	1	6	0
AGPAT1	83	31	86	12	84	91
AGPAT2	2	1	57	0	1	11
AGPAT3	20	14	62	54	101	54
AGPAT4	51	41	50	45	64	21
AGPAT5	260	280	1004	1757	1149	417
AGPAT6	51	24	63	33	47	45
AGPAT7	25	11	144	7	48	41
AGPS	96	55	210	350	293	82
AGR2	21	7	11	12	14	106
AGRN	345	298	695	98	587	202
AGRP	0	0	1	0	0	0
AGT	948	860	6	79	0	1
AGTPBP1	28	29	54	9	47	40
AGTR1	0	0	5	0	0	2
AGTR2	0	0	0	0	0	7
AGTRAP	204	152	391	286	306	105
AGXT2L1	0	0	0	0	0	2
AHCTF1	69	53	220	33	41	37
AHCY	594	395	1024	463	489	769
AHCYL1	709	653	3271	745	767	428
AHDC1	8	2	7	5	11	21
AHI1	55	69	214	40	40	59
AHNAK	0	0	1	7	0	2
AHR	458	252	80	1326	1101	84
AHSA1	136	107	410	159	311	116
AHSA2	38	33	165	185	67	90
AHSG	0	0	0	2	0	0
AICDA	1	0	3	0	0	0
AIFL	0	0	0	0	0	3
AIG1	63	65	280	289	243	105
AIM1	2	0	45	58	0	0
AIM1L	0	0	2	0	0	0
AIP	87	115	259	453	468	135
AIP1	92	74	13	142	59	26
AIPL1	8	15	34	85	12	33
AK1	37	45	109	138	112	130
AK2	156	110	1380	415	316	306
AK3	197	101	390	106	131	173
AK3L1	14	22	69	21	52	38
AK5	9	4	33	36	16	14
AK7	1	1	0	13	0	5
AKAP1	42	39	169	18	47	39
AKAP10	86	81	440	557	309	102
AKAP11	78	90	97	3	76	49
AKAP12	72	103	77	196	370	236
AKAP13	26	45	50	40	79	29
AKAP14	9	1	7	0	11	18
AKAP3	3	4	0	9	3	4
AKAP6	29	34	87	206	18	25
AKAP7	57	59	108	225	410	334
AKAP8	51	54	93	80	106	63
AKAP8L	155	20	185	19	89	133
AKAP9	56	39	133	362	204	93
AKIP	1	0	9	0	0	0
AKNA	8	2	57	13	36	21
AKR1A1	126	183	348	140	306	161
AKR1B1	305	370	1860	520	156	150
AKR1B10	0	0	33	209	0	0
AKR1C1	0	1	1	0	0	16
AKR1C2	0	0	0	0	0	2
AKR1C3	0	4	15	1	0	9
AKR1C4	0	0	0	0	0	2
AKR1CL2	0	0	0	0	24	0
AKR1D1	11	9	5	5	4	2
AKR7A2	36	44	223	83	61	174
AKR7A3	3	1	4	4	0	2
AKT1	99	34	210	10	53	46
AKT1S1	14	4	5	7	1	4
AKT2	359	215	287	54	268	156
AKT3	217	192	717	365	606	232
ALAD	38	28	76	159	185	106
ALAS1	71	68	327	324	214	169
ALAS2	0	0	5	2	0	1
ALB	0	0	2	3	1	4
ALCAM	236	292	690	461	171	213
ALDH16A1	71	34	20	19	69	83
ALDH18A1	79	86	107	59	28	52
ALDH1A1	111	159	659	543	344	376
ALDH1A2	0	0	0	0	1	2
ALDH1A3	0	0	20	137	0	3
ALDH1B1	35	48	100	109	149	204
ALDH1L1	0	0	0	0	4	0
ALDH1L2	0	0	8	0	0	0
ALDH2	93	95	267	93	72	154
ALDH3A1	2	0	30	2	0	0
ALDH3A2	307	343	191	66	75	50
ALDH3B1	15	17	27	14	41	19
ALDH4A1	17	13	17	18	17	8
ALDH5A1	6	2	41	71	4	29
ALDH6A1	110	61	108	172	186	113
ALDH7A1	199	115	160	301	1139	279
ALDH8A1	5	1	7	0	0	0
ALDH9A1	45	55	107	36	153	32
ALDOA	501	372	2360	429	831	430
ALDOB	0	1	0	0	0	0
ALDOC	56	31	506	155	17	54
ALF	117	133	305	155	461	259
ALG1	13	4	19	0	17	16
ALG10	17	20	34	19	12	10
ALG12	27	11	17	9	48	17
ALG14	20	11	37	23	53	17
ALG2	24	30	58	101	33	20
ALG3	25	7	134	39	28	21
ALG5	39	52	135	42	63	64
ALG6	260	209	267	279	131	110
ALG8	61	39	87	81	43	67
ALG9	14	1	31	34	41	22
ALK	0	1	0	0	2	1
ALKBH	8	1	4	24	0	6
ALKBH1	67	59	111	113	82	92
ALKBH3	4	2	70	36	1	11
ALKBH4	32	26	59	23	16	47
ALKBH5	103	54	332	58	178	87
ALKBH6	23	9	31	0	14	10
ALKBH7	340	171	282	99	425	322
ALKBH8	18	39	9	3	0	6
ALLC	0	0	1	0	0	0
ALMS1	18	27	46	56	15	46
ALOX12	2	0	0	0	0	0
ALOX12B	0	0	3	1	0	0
ALOX12P2	0	0	0	0	7	1
ALOX15	0	1	0	0	0	0
ALOX15B	0	1	1	0	0	0
ALOX5	0	4	3	5	1	5
ALOX5AP	0	0	0	0	0	1
ALOXE3	0	0	1	0	0	0
ALPK1	101	56	277	138	148	110
ALPK2	56	26	42	200	68	13
ALPK3	0	0	1	0	2	2
ALPP	9	7	71	4	9	4
ALS2	125	79	158	361	193	193
ALS2CL	0	0	40	0	0	0
ALS2CR10	1	0	0	0	1	1
ALS2CR11	0	0	0	0	1	1
ALS2CR13	25	22	25	6	10	41
ALS2CR15	6	6	25	45	56	27
ALS2CR16	1	2	1	0	0	2
ALS2CR19	6	5	16	2	69	22
ALS2CR2	7	21	35	6	28	25
ALS2CR3	55	59	85	343	128	53
ALS2CR4	18	23	113	264	51	97
ALS2CR7	0	0	4	0	0	0
ALS2CR8	5	3	5	3	3	3
ALS4	222	178	316	403	746	423
ALX3	3	2	17	32	21	7
ALX4	0	0	0	0	0	1
AMACO	4	3	2	0	0	1
AMACR	15	14	21	85	219	41
AMBN	0	0	0	0	0	4
AMD1	68	93	285	57	118	123
AMDHD1	0	6	1	0	0	0
AMDHD2	18	8	15	10	13	7
AMFR	139	170	152	180	160	108
AMH	5	13	18	0	49	24
AMHR2	0	0	1	0	0	0
AMICA1	1	0	0	0	0	0
AMID	2	2	51	6	15	5
AMIGO	7	6	9	1	19	4
AMIGO1	2	6	5	0	2	2
AMIGO2	0	0	43	0	54	85
AMMECR1	41	21	122	103	0	17
AMN	4	0	0	0	10	10
AMOT	27	30	33	39	293	33
AMOTL1	171	123	84	475	384	167
AMOTL2	62	31	759	176	535	163
AMPD1	0	0	1	0	0	0
AMPD2	194	135	1018	962	565	784
AMPD3	12	55	10	11	3	0
AMPH	7	2	5	6	54	14
AMSH-LP	1	3	18	17	0	2
AMT	5	1	22	8	7	8
AMY1A	0	0	1	0	0	1
AMY2A	5	24	21	20	0	10
AMY2B	2	2	36	9	15	20
AMZ2	89	188	540	473	400	93
ANAPC1	26	15	49	24	26	31
ANAPC10	47	40	445	259	128	102
ANAPC11	496	234	1289	335	853	280
ANAPC13	137	90	758	572	456	323
ANAPC2	10	2	31	6	23	12
ANAPC4	18	29	29	66	44	9
ANAPC5	74	15	139	109	79	101
ANAPC7	85	90	178	249	282	125
ANGEL1	18	8	4	6	7	4
ANGEL2	19	16	36	48	14	17
ANGPT1	47	37	2	103	6	20
ANGPT2	0	0	0	5	6	0
ANGPTL1	27	22	45	11	114	74
ANGPTL2	46	76	17	78	9	6
ANGPTL4	2	0	5	6	31	8
ANGPTL7	0	0	1	4	2	0
ANK1	10	10	94	113	62	17
ANK2	660	440	2126	3532	3961	7036
ANK3	10	17	32	3	90	67
ANKDD1A	1	4	2	0	13	2
ANKFY1	83	109	59	71	171	89
ANKH	486	309	1464	1261	2539	2195
ANKHD1	95	70	446	285	157	184
ANKIB1	972	1032	450	2188	1245	335
ANKMY1	13	28	31	25	28	11
ANKMY2	53	49	183	313	120	76
ANKRA2	70	52	458	157	122	70
ANKRD1	0	2	11	0	8	18
ANKRD10	208	202	215	393	188	335
ANKRD11	17	5	62	71	68	33
ANKRD12	168	241	107	441	204	162
ANKRD13	83	77	164	131	158	72
ANKRD13B	145	150	57	30	141	35
ANKRD13C	3	1	10	0	12	1
ANKRD13D	15	4	40	0	17	20
ANKRD15	263	334	138	181	51	51
ANKRD16	11	8	45	14	25	42
ANKRD17	152	125	173	252	205	146
ANKRD19	4	0	7	0	0	1
ANKRD2	0	0	1	0	0	0
ANKRD20A	9	14	34	15	21	5
ANKRD20A1	0	2	3	0	0	2
ANKRD20B	0	0	0	3	2	1
ANKRD21	0	0	1	0	0	0
ANKRD23	20	10	36	9	8	14
ANKRD24	1	2	4	4	0	0
ANKRD25	149	101	161	191	125	190
ANKRD26	39	62	78	63	46	90
ANKRD27	69	68	174	85	65	58
ANKRD28	200	185	718	618	260	104
ANKRD29	0	0	16	20	0	1
ANKRD30B	1895	1956	2557	3113	3878	1192
ANKRD32	37	27	120	134	45	67
ANKRD36	2	16	5	0	6	2
ANKRD37	13	10	65	31	50	10
ANKRD38	2	2	0	0	0	4
ANKRD39	9	6	20	10	11	8
ANKRD40	5	7	51	64	6	18
ANKRD42	12	22	68	10	7	22
ANKRD44	0	8	5	5	0	2
ANKRD45	0	0	0	0	0	2
ANKRD46	10	11	27	9	20	12
ANKRD47	4	1	2	0	0	0
ANKRD49	1	1	8	0	0	0
ANKRD5	1	1	39	108	8	31
ANKRD50	0	0	2	0	0	0
ANKRD52	132	174	550	1251	2585	463
ANKRD6	42	76	168	172	290	75
ANKRD7	3	9	18	0	5	0
ANKRD9	72	70	173	123	288	137
ANKS1	15	21	13	64	14	39
ANKS1A	7	5	17	7	9	9
ANKS1B	85	71	34	159	632	23
ANKS3	6	4	14	1	12	11
ANKS6	11	10	10	5	13	7
ANKZF1	41	34	132	4	63	38
ANLN	74	94	247	561	151	114
ANP32A	170	143	275	272	482	464
ANP32B	413	482	1696	942	486	455
ANP32C	0	0	0	0	1	0
ANP32E	348	308	802	527	330	639
ANPEP	0	0	0	0	3	0
ANTXR1	89	81	75	83	422	495
ANTXR2	83	61	58	274	1336	162
ANUBL1	10	6	1	8	38	8
ANXA1	103	60	12936	10109	5139	678
ANXA10	0	0	3	16	0	0
ANXA11	169	151	505	181	182	66
ANXA13	0	0	4	6	12	1
ANXA2	621	281	5927	3371	6424	1643
ANXA2P1	0	0	1	0	0	0
ANXA2P3	2	1	20	7	12	4
ANXA3	0	0	9	1	0	3
ANXA4	27	94	181	196	47	76
ANXA5	874	1446	5577	4097	6287	969
ANXA6	164	102	100	18	154	155
ANXA7	230	198	855	607	375	276
ANXA8	3	0	2	0	0	0
ANXA9	3	1	4	4	0	0
AOAH	2	6	4	6	5	2
AOC2	5	8	13	8	21	1
AOC3	4	0	2	0	0	0
AOF1	41	35	114	116	98	56
AOF2	287	222	358	300	355	180
AOX1	0	0	21	16	0	0
AP1B1	67	36	88	12	54	112
AP1G1	308	300	480	2439	1420	590
AP1G2	13	3	3	7	0	3
AP1GBP1	95	124	206	74	125	57
AP1M1	64	18	105	1	22	31
AP1S1	10	2	19	0	6	14
AP1S2	1445	1912	1095	2119	3771	1609
AP1S3	3	7	1	50	45	6
AP2A1	33	7	96	3	109	29
AP2A2	10	2	39	3	33	18
AP2B1	467	485	418	201	976	215
AP2M1	509	271	1413	64	960	363
AP2S1	95	32	260	15	196	76
AP3B1	424	332	604	1162	884	724
AP3B2	9	11	45	16	39	19
AP3D1	1299	1129	1316	2252	3153	1016
AP3M1	206	254	178	65	275	163
AP3M2	34	31	164	251	135	66
AP3S1	259	113	962	592	495	701
AP3S2	36	53	143	87	179	112
AP4B1	25	30	50	25	24	29
AP4E1	23	23	60	70	117	34
AP4M1	73	34	94	116	65	52
AP4S1	36	30	49	62	51	42
APAF1	56	64	45	138	97	43
APBA1	19	4	2	0	0	8
APBA2	135	74	46	523	172	167
APBA2BP	9	2	44	2	35	19
APBA3	50	14	54	48	29	28
APBB1	182	85	141	133	303	469
APBB1IP	1	1	4	0	0	1
APBB2	121	87	130	102	339	155
APBB3	4	3	6	0	20	17
APC	44	59	45	65	149	71
APC2	24	10	20	4	11	43
APCDD1	158	101	8	16	5	22
APEG1	11	6	71	100	298	56
APEH	174	254	368	238	897	155
APEX1	2812	3414	5871	11806	7047	4136
APEX2	38	31	113	29	34	10
APG10L	16	10	102	88	39	43
APG12L	42	29	303	127	171	68
APG16L	7	0	6	0	0	2
APG3L	13	7	17	3	4	9
APG4A	0	0	2	0	2	0
APG4B	104	82	46	13	44	12
APG4C	19	16	16	8	7	13
APG4D	2	0	1	0	6	2
APG5L	17	9	31	18	28	17
APG7L	39	34	46	14	61	52
APG9L1	4	3	3	0	0	2
APH-1A	16	17	25	6	22	8
APH1A	277	257	451	414	846	224
APH1B	2	3	4	0	7	3
API5	1068	1275	3408	2764	3970	1228
APIP	102	84	538	114	106	100
APLN	1	1	0	0	144	35
APLP1	696	516	813	2254	7476	1482
APLP2	3233	3173	4317	6576	14425	1522
APOA1BP	67	61	387	49	55	112
APOA2	0	0	4	4	0	2
APOA4	0	0	0	0	1	0
APOB	0	0	0	0	1	0
APOBEC2	0	0	0	0	4	6
APOBEC3B	24	28	363	232	62	39
APOBEC3C	211	260	701	619	585	265
APOBEC3F	1	2	29	27	30	6
APOBEC3G	3	0	51	4	18	0
APOC1	3	5	21	2	2	1
APOC2	10	8	1	0	0	0
APOC4	0	0	1	0	0	0
APOD	370	645	19	8	1	81
APOE	123	126	65	20	55	85
APOF	0	0	0	0	1	0
APOH	0	3	2	1	0	0
APOL1	3	5	122	612	43	12
APOL2	7	7	65	5	14	7
APOL3	0	0	16	15	1	1
APOL4	0	4	0	0	0	1
APOL6	49	36	325	207	150	44
APOLD1	11	7	26	29	8	15
APOM	11	18	31	11	18	16
APP	3539	2865	4132	7618	8142	3394
APPBP1	32	20	180	124	113	66
APPBP2	108	156	104	95	310	160
APPL	171	142	412	291	342	355
APRIN	139	201	123	162	294	192
APRT	99	95	205	67	94	54
APS	9	2	30	1	6	7
APTX	65	53	167	67	162	79
APXL	4	14	133	157	207	65
APXL2	8	2	44	7	3	2
AQP1	9	2	9	0	0	0
AQP11	3	6	31	100	27	7
AQP3	0	0	5	0	0	2
AQP4	3	0	0	0	8	35
AQP5	1	0	0	0	0	4
AQP6	0	0	0	1	0	0
AQP7	8	2	0	0	0	0
AQP7P1	20	38	14	0	0	10
AQR	67	60	171	163	271	204
AR	8	13	11	0	4	1
ARAF	106	69	217	101	340	57
ARC	16	9	7	4	450	12
ARCH	84	74	206	177	197	121
ARCN1	142	82	296	244	162	125
ARD1	12	6	48	0	8	7
ARD1A	61	61	342	41	100	79
AREG	0	1	0	3	0	0
ARF1	393	196	911	96	291	249
ARF3	366	265	1120	247	911	528
ARF4	330	292	3415	1278	1214	319
ARF4L	22	16	70	49	44	33
ARF5	28	29	86	24	7	10
ARF6	182	149	907	815	589	326
ARFGAP1	7	1	7	6	4	5
ARFGAP3	25	7	75	7	57	51
ARFGEF1	28	41	75	88	89	66
ARFGEF2	74	75	427	114	314	105
ARFIP1	74	89	179	219	206	164
ARFIP2	47	24	119	8	36	69
ARFRP1	9	6	77	11	30	6
ARFRP2	29	25	39	33	39	95
ARG1	0	0	2	3	0	1
ARG2	110	103	77	249	195	102
ARG99	1	0	3	0	0	1
ARGBP2	39	15	70	45	190	145
ARH	2	5	17	4	1	3
ARHE	11	13	23	3	0	32
ARHGAP1	1080	980	1319	815	1450	797
ARHGAP10	12	0	12	0	0	5
ARHGAP11A	20	6	192	84	22	54
ARHGAP12	385	383	175	432	968	368
ARHGAP15	7	2	3	3	1	5
ARHGAP17	131	106	317	507	420	387
ARHGAP18	15	1	92	62	183	75
ARHGAP19	14	8	16	8	67	16
ARHGAP20	109	45	1	20	0	0
ARHGAP21	135	62	131	81	313	234
ARHGAP22	28	37	11	122	59	6
ARHGAP23	103	139	335	385	288	184
ARHGAP24	14	7	10	23	199	12
ARHGAP25	0	0	2	0	5	0
ARHGAP26	60	61	174	206	72	56
ARHGAP27	2	0	4	0	6	0
ARHGAP28	5	4	3	9	2	55
ARHGAP29	3	0	132	162	27	41
ARHGAP30	0	0	2	0	0	0
ARHGAP4	0	0	6	0	2	2
ARHGAP5	134	79	264	235	158	225
ARHGAP6	182	275	20	60	84	77
ARHGAP8	0	0	4	0	4	68
ARHGAP9	19	0	0	1	0	3
ARHGDIA	51	5	95	6	32	33
ARHGDIB	0	0	0	0	7	4
ARHGDIG	0	0	0	0	0	16
ARHGEF1	77	42	76	4	38	34
ARHGEF10	673	534	811	440	807	1802
ARHGEF10L	10	2	10	0	17	3
ARHGEF11	68	100	198	111	172	266
ARHGEF12	247	204	248	621	428	231
ARHGEF15	0	0	1	0	0	0
ARHGEF16	7	2	0	0	0	1
ARHGEF17	129	188	119	189	907	305
ARHGEF18	79	47	64	107	104	50
ARHGEF19	2	2	20	22	6	11
ARHGEF2	229	134	630	255	405	239
ARHGEF3	33	20	137	126	77	76
ARHGEF4	58	78	146	390	123	403
ARHGEF5	0	0	0	3	0	0
ARHGEF6	14	8	63	36	111	17
ARHGEF7	154	145	40	57	888	79
ARHGEF9	81	51	26	7	23	78
ARHI	7	7	7	29	0	6
ARHN	28	15	63	20	6	45
ARID1A	101	94	133	44	76	65
ARID1B	535	717	634	846	1039	713
ARID2	109	149	130	147	285	210
ARID3A	4	0	3	0	0	5
ARID3B	4	5	51	23	62	22
ARID4A	38	32	18	36	53	21
ARID4B	69	78	80	49	121	39
ARID5A	77	23	22	6	0	4
ARID5B	41	18	63	193	47	70
ARIH1	76	103	294	134	230	115
ARIH2	176	123	483	764	225	276
ARK5	31	30	235	57	53	92
ARL1	159	223	1475	457	534	197
ARL10	50	24	121	9	71	59
ARL10A	6	0	2	14	0	0
ARL10B	36	31	14	11	77	21
ARL10C	177	153	253	300	419	114
ARL13	0	0	0	0	1	2
ARL13B	43	37	50	91	60	69
ARL15	10	13	5	13	18	3
ARL16	0	1	0	0	0	0
ARL2	122	71	350	100	134	95
ARL2BP	551	542	1923	1525	1457	842
ARL2L1	3	12	11	5	11	13
ARL3	136	74	121	80	263	251
ARL4A	152	244	438	330	182	346
ARL4C	152	188	705	563	750	453
ARL4D	31	10	182	46	12	58
ARL5	97	119	115	152	311	145
ARL5A	41	23	33	16	21	12
ARL5B	0	0	2	0	0	1
ARL5C	0	0	1	0	0	0
ARL6	68	33	108	118	32	52
ARL6IP	192	197	509	517	414	411
ARL6IP2	36	29	206	70	75	51
ARL6IP4	491	343	908	67	528	301
ARL6IP5	411	414	2434	3867	2568	1016
ARL6IP6	458	571	700	1057	1228	652
ARL7	27	47	121	765	380	166
ARL8	81	100	183	72	282	185
ARL8A	267	303	103	216	633	89
ARL8B	29	18	71	138	127	139
ARL9	2	0	20	21	0	4
ARMC1	95	75	330	145	163	70
ARMC2	11	16	18	31	5	24
ARMC3	0	0	0	3	0	2
ARMC4	0	0	0	0	0	4
ARMC5	59	54	107	105	409	171
ARMC6	140	47	89	21	93	113
ARMC7	46	46	131	96	56	37
ARMC8	127	133	266	417	435	166
ARMC9	16	11	8	0	39	10
ARMCX1	178	163	425	279	321	157
ARMCX2	134	128	285	311	278	136
ARMCX3	409	319	1018	704	751	535
ARMCX4	18	39	52	49	122	29
ARMCX5	39	24	61	71	68	101
ARMCX6	34	14	56	22	20	43
ARMET	324	149	908	544	539	335
ARMETL1	0	0	1	0	0	1
ARNT	115	61	228	225	242	163
ARNT2	178	104	28	9	121	106
ARNTL	27	33	57	216	141	16
ARNTL2	1	0	31	3	8	5
ARP3BETA	31	25	39	99	32	55
ARPC1A	130	147	386	249	371	210
ARPC1B	138	157	2027	5028	746	198
ARPC2	339	350	617	111	430	239
ARPC3	236	274	1845	2586	938	501
ARPC4	173	146	599	836	433	351
ARPC5	1043	1161	3361	681	2100	1398
ARPC5L	70	71	329	59	179	108
ARPM1	1	0	0	0	0	1
ARPP-19	136	64	833	347	1659	813
ARPP-21	3	4	4	30	0	7
ARRB1	13	9	1	0	44	15
ARRB2	20	1	39	0	5	4
ARRDC1	44	43	149	9	97	44
ARRDC2	8	4	15	8	0	0
ARRDC3	69	52	277	69	79	52
ARRDC4	85	75	53	123	0	80
ARS2	92	64	118	39	110	93
ARSA	25	12	33	41	51	2
ARSB	47	46	113	100	111	84
ARSD	20	41	63	32	74	13
ARSE	12	15	28	0	30	5
ARSG	0	2	20	0	14	3
ARSI	1	0	2	1	2	2
ARSJ	161	103	402	326	293	409
ARSK	139	147	470	179	114	80
ART3	0	4	0	1	16	4
ART4	0	1	0	0	0	0
ART5	4270	3311	11367	13892	8810	9729
ARTN	2	0	117	10	3	8
ARTS-1	113	130	453	1419	348	87
ARV1	29	10	95	85	0	89
ARVCF	19	7	9	6	74	13
ARX	3	0	3	0	0	2
AS3MT	22	27	72	76	132	55
ASAH1	726	630	472	649	1096	345
ASAH3L	2	0	0	0	0	0
ASAHL	12	6	85	11	14	17
ASAM	56	48	23	755	16	89
ASAP	3	1	51	146	152	39
ASB1	55	60	103	101	244	161
ASB13	17	38	59	25	65	75
ASB14	5	11	20	20	2	4
ASB16	0	1	0	0	0	1
ASB17	1988	1902	6863	4856	3877	4850
ASB2	485	365	2372	1278	921	1127
ASB3	95	127	150	158	221	187
ASB4	0	0	0	0	0	1
ASB5	0	0	1	0	0	1
ASB6	19	11	57	16	44	10
ASB7	29	11	72	37	70	50
ASB8	32	42	42	65	51	25
ASB9	1	2	6	3	0	0
ASCC1	61	62	86	31	88	84
ASCC2	28	21	76	40	48	63
ASCC3	54	25	265	221	336	239
ASCC3L1	296	143	418	702	592	820
ASCIZ	64	72	121	232	216	136
ASCL1	210	156	0	111	90	28
ASE-1	80	114	183	6	27	33
ASF1A	227	229	370	1118	767	426
ASF1B	28	43	206	119	81	63
ASGR1	2	0	2	0	4	0
ASH1L	37	27	103	20	50	22
ASH2L	54	64	79	21	58	41
ASK	4	3	8	0	0	2
ASL	111	70	154	63	142	34
ASMTL	170	193	225	55	354	75
ASNA1	84	10	100	16	70	49
ASNS	375	501	2660	442	224	199
ASNSD1	26	27	59	158	74	53
ASPA	11	5	0	0	0	0
ASPH	103	54	310	446	336	91
ASPHD1	1	3	7	44	0	3
ASPHD2	5	3	0	2	0	0
ASPM	223	225	957	1087	397	564
ASPN	1	0	0	7	0	34
ASPSCR1	27	25	43	20	55	17
ASRGL1	83	77	172	116	50	67
ASS	1	0	72	1	9	28
ASTE1	8	3	11	0	0	5
ASTN	156	129	1	271	0	182
ASTN2	18	25	270	29	72	72
ASXL1	75	37	300	120	147	196
ASXL2	17	16	33	13	22	14
ATAD1	107	106	320	121	338	130
ATAD2	80	82	216	132	126	108
ATAD3A	55	43	93	31	29	63
ATAD3B	38	17	20	8	17	24
ATBF1	35	17	51	46	7	117
ATCAY	184	49	24	3	4	74
ATE1	47	47	84	27	239	113
ATF1	43	35	131	48	18	62
ATF2	319	330	825	992	1233	835
ATF3	641	631	5338	4532	2403	2932
ATF4	46	28	865	39	134	183
ATF5	768	924	2617	2352	4051	675
ATF6	103	75	300	75	142	95
ATF7	18	28	40	11	51	34
ATF7IP	161	228	304	228	446	173
ATF7IP2	0	0	1	1	21	17
ATG10	0	0	1	0	0	0
ATG12	33	22	100	57	29	54
ATG16L1	13	5	23	19	20	37
ATG16L2	35	35	36	45	11	17
ATG3	26	25	127	79	24	31
ATG4A	41	37	150	93	71	8
ATG4B	17	23	19	41	64	33
ATG4C	36	42	57	8	4	12
ATG4D	9	1	19	1	12	10
ATG5	569	588	998	814	1322	464
ATG7	1	6	14	10	0	4
ATG9A	49	17	85	15	44	86
ATG9B	1	0	2	1	0	3
ATHL1	139	117	38	25	130	62
ATIC	44	67	243	31	14	74
ATM	72	88	54	9	16	51
ATN1	85	24	110	37	124	139
ATOH7	1	0	2	0	0	6
ATOH8	69	18	0	18	317	242
ATOX1	325	168	1927	354	978	282
ATP10A	2	2	2	0	0	5
ATP10B	439	457	0	7	0	0
ATP10D	37	37	46	37	12	9
ATP11A	126	141	98	76	226	49
ATP11B	66	80	294	347	251	156
ATP11C	47	110	121	297	166	41
ATP13A1	83	19	46	8	35	53
ATP13A2	28	23	100	64	47	470
ATP13A3	212	144	610	315	212	126
ATP13A4	0	0	0	0	0	1
ATP13A5	5	2	0	0	0	0
ATP1A1	196	213	396	206	143	29
ATP1A2	23	29	3	1	496	982
ATP1A3	3	2	0	0	4	0
ATP1B1	94	128	205	149	81	122
ATP1B2	248	266	8	66	993	455
ATP1B3	362	262	1109	652	393	190
ATP1B4	14	0	0	0	0	14
ATP2A1	16	8	30	32	17	25
ATP2A2	916	769	864	1047	2797	1123
ATP2A3	0	0	1	0	0	0
ATP2B1	232	264	317	395	868	353
ATP2B2	19	17	12	7	9	16
ATP2B3	0	0	1	0	0	0
ATP2B4	104	60	192	376	299	290
ATP2C1	153	136	451	714	435	205
ATP5A1	11057	11334	10820	13182	21878	9788
ATP5B	1435	2091	4996	1818	3121	1128
ATP5C1	418	286	652	337	333	687
ATP5D	365	182	416	59	222	200
ATP5E	618	1040	7334	21253	14015	5115
ATP5F1	819	1110	1610	517	1007	683
ATP5G1	199	67	1034	115	227	384
ATP5G2	657	279	1432	296	696	758
ATP5G3	1733	1800	1	13475	15653	6618
ATP5H	2	2	8	0	0	1
ATP5I	6	6	20	14	5	3
ATP5J	3757	3669	15284	5071	8734	4480
ATP5J2	259	234	1526	952	599	725
ATP5L	1024	760	9280	2191	4065	3007
ATP5L2	0	0	2	0	0	0
ATP5O	160	162	396	332	510	226
ATP5S	65	73	95	110	203	56
ATP6AP1	469	414	654	421	1826	616
ATP6AP2	749	1057	1802	2655	2254	836
ATP6V0A1	27	10	27	20	6	21
ATP6V0A2	36	70	111	64	97	48
ATP6V0A4	0	4	1	0	0	0
ATP6V0B	121	26	423	19	77	62
ATP6V0C	600	494	1218	587	2199	494
ATP6V0D1	123	110	212	213	528	374
ATP6V0D2	1	3	15	0	4	2
ATP6V0E	148	110	585	53	294	137
ATP6V0E2L	250	150	167	80	237	52
ATP6V1A	79	71	238	42	110	44
ATP6V1B1	10	8	8	18	2	0
ATP6V1B2	138	174	333	498	488	125
ATP6V1C1	216	232	297	482	548	129
ATP6V1C2	118	101	60	57	315	60
ATP6V1D	79	64	154	122	256	248
ATP6V1E1	257	238	889	988	869	501
ATP6V1E2	2	1	10	3	0	2
ATP6V1F	121	122	462	216	355	91
ATP6V1G1	551	500	1948	932	480	473
ATP6V1G2	17	10	7	71	59	19
ATP6V1H	74	67	310	300	551	165
ATP7A	111	94	145	330	451	158
ATP7B	37	62	40	30	268	114
ATP8A1	16	23	31	0	0	4
ATP8A2	37	56	0	1	0	3
ATP8B1	6	8	7	3	0	1
ATP8B2	52	32	44	31	18	25
ATP8B3	0	0	1	0	0	0
ATP8B4	1	1	5	1	0	2
ATP9A	33	39	168	333	665	173
ATP9B	26	27	14	10	34	20
ATPAF1	100	95	456	180	361	303
ATPAF2	11	25	54	59	48	23
ATPBD1B	36	25	84	3	21	26
ATPBD1C	10	9	55	37	16	34
ATPBD3	27	2	81	4	7	8
ATPBD4	2	1	6	0	4	20
ATPIF1	1003	887	7138	2084	3597	3276
ATR	10	12	77	96	25	8
ATRN	2129	2102	2768	3276	4247	1393
ATRNL1	228	183	131	53	17	241
ATRX	276	297	282	236	461	327
ATXN1	47	45	135	80	29	24
ATXN10	1857	1989	5181	5941	5006	2103
ATXN2	77	43	235	107	57	184
ATXN2L	126	63	954	114	372	192
ATXN3	28	31	52	45	76	24
ATXN7	26	41	84	115	68	44
ATXN7L1	10	10	10	34	21	12
ATXN7L2	9	5	14	0	0	13
ATXN7L3	78	72	274	362	372	278
ATXN7L4	2	0	0	0	0	1
AUH	12	16	19	57	26	31
AUP1	661	457	948	844	961	846
AURKAIP1	35	0	200	1	29	6
AURKB	129	103	470	96	100	107
AURKC	4	9	5	0	0	0
AUTS2	488	604	619	1208	1979	595
AVEN	19	14	113	55	145	86
AVIL	117	83	11	8	13	12
AVO3	24	31	73	53	36	32
AVPI1	26	50	182	20	46	30
AVPR1A	0	0	0	0	0	3
AVPR2	0	0	1	0	0	0
AXIN1	49	35	311	165	245	170
AXIN2	54	39	55	122	34	198
AXL	51	17	162	5	66	46
AXOT	0	3	9	4	1	0
AXUD1	13	8	52	9	23	13
AYP1	4	3	8	1	12	15
AYTL1	1	0	2	0	1	0
AYTL2	105	38	112	241	117	338
AZGP1	620	539	36	4	1	0
AZI1	16	6	31	8	14	10
AZI2	140	118	269	261	262	118
AZIN1	88	51	139	277	130	68
AZU1	1	0	0	1	0	1
B1	1	0	2	9	0	0
B2M	3285	5725	64936	23635	15936	4603
B3GALNT2	6	6	4	0	0	1
B3GALT1	4	1	0	0	0	0
B3GALT2	4	1	0	0	28	22
B3GALT3	36	18	245	268	86	30
B3GALT4	0	0	2	0	0	1
B3GALT6	357	281	401	265	690	164
B3GALT7	0	0	0	0	0	6
B3GAT1	145	92	1	3	70	16
B3GAT2	2	4	0	0	8	17
B3GAT3	187	97	303	301	427	312
B3Gn-T6	1	1	4	0	2	0
B3GNT1	20	47	120	121	69	25
B3GNT4	0	0	1	0	0	2
B3GNT5	21	18	136	128	41	24
B3GNT6	340	190	223	531	1286	544
B3GNTL1	3	0	12	4	5	29
B3GTL	15	33	19	31	15	49
B4GalNac-T3	39	29	6	32	6	11
B4GALNT1	972	633	80	215	117	111
B4GALT1	6	4	176	669	80	46
B4GALT2	60	15	70	29	26	74
B4GALT3	152	146	202	226	397	81
B4GALT4	28	24	81	14	24	20
B4GALT5	999	847	2386	3075	2180	606
B4GALT6	414	175	117	1	39	236
B4GALT7	25	6	64	22	35	38
B7	28	12	38	0	1	11
B7H3	7	3	7	7	15	2
BAALC	2357	1400	14	582	825	429
BAAT	3	0	2	0	16	4
BACE1	177	117	212	224	626	218
BACE2	175	285	463	515	0	2
BACH	13	12	35	6	10	4
BACH1	108	45	79	128	84	62
BACH2	72	44	73	6	20	23
BAD	28	8	63	1	39	11
BAG1	33	44	109	22	33	36
BAG2	16	16	117	95	27	58
BAG3	83	66	724	86	313	117
BAG4	35	33	130	71	57	66
BAG5	133	122	206	357	338	128
BAGE	3	2	0	1	1	0
BAHCC1	23	17	24	68	67	20
BAHD1	44	38	236	101	250	247
BAI1	460	161	0	0	49	10
BAI2	179	99	51	61	76	40
BAI3	8	22	10	20	20	4
BAIAP1	110	60	49	105	55	91
BAIAP2	70	70	177	246	195	95
BAIAP2L1	0	0	170	10	6	4
BAIAP2L2	1	0	3	0	0	2
BAIAP3	12	4	65	10	100	35
BAK1	42	21	137	8	98	35
BAMBI	1109	1627	37	164	28	23
BANF1	340	116	558	260	449	523
BANK1	0	0	0	16	8	0
BANP	18	28	32	33	31	17
BAP1	152	144	271	300	272	214
BAPX1	1	0	7	0	0	0
BARD1	84	50	232	625	145	211
BARX1	0	0	2	0	0	0
BASP1	583	293	4	5	1785	174
BAT1	192	166	955	431	398	429
BAT2	253	44	1120	16	360	267
BAT2D1	7	0	6	0	14	3
BAT3	167	76	468	83	276	234
BAT4	29	18	92	15	18	55
BAT5	85	84	533	360	339	286
BAT8	4	4	7	0	0	1
BATF2	2	1	16	73	12	8
BAX	192	66	185	40	202	347
BAZ1A	86	71	153	117	34	80
BAZ1B	441	364	890	1603	618	464
BAZ2A	151	118	894	353	563	337
BAZ2B	103	133	116	146	277	117
BBC3	178	144	1146	763	5478	1008
BBOX1	23	19	80	37	57	48
BBP	16	18	27	9	17	16
BBS1	28	8	64	37	82	127
BBS2	536	405	2419	1371	1010	1180
BBS4	4	1	31	0	6	41
BBS5	62	96	101	111	70	61
BBS7	23	31	103	21	76	18
BBX	212	201	885	1093	329	344
BC-2	3	2	6	0	1	3
BC002942	142	45	143	86	186	77
BC036928	4	1	11	5	2	0
BC37295_3	2	1	3	0	0	0
BCAM	20	0	44	3	36	8
BCAN	381	365	27	10	61	15
BCAP29	258	221	592	695	601	353
BCAP31	144	163	1197	715	744	458
BCAR1	30	5	25	12	35	21
BCAR3	83	58	618	85	524	350
BCAS1	20	15	31	14	1	10
BCAS2	7	7	52	18	21	27
BCAS3	20	5	28	11	67	12
BCAS4	6	2	111	34	18	14
BCAT1	531	520	564	525	1786	502
BCAT2	76	16	172	3	75	34
BCCIP	262	313	756	519	518	372
BCDIN3	299	247	329	233	371	161
BCDO2	1	3	28	61	22	6
BCHE	388	310	65	82	63	75
BCKDHA	239	128	314	36	129	127
BCKDHB	147	211	314	1718	658	314
BCKDK	127	102	149	154	195	89
BCL10	116	166	497	587	971	168
BCL11A	19	17	14	5	26	49
BCL11B	1	3	6	3	7	12
BCL2	20	18	30	24	23	35
BCL2A1	8	4	1	32	0	4
BCL2L1	27	19	176	19	47	26
BCL2L11	19	6	22	13	12	20
BCL2L12	19	8	47	15	22	37
BCL2L13	28	31	97	72	129	59
BCL2L14	163	232	56	2	5	11
BCL2L2	33	24	40	4	19	18
BCL3	85	35	220	61	84	18
BCL6	53	52	124	63	19	59
BCL6B	1	0	0	0	0	0
BCL7A	160	135	164	191	154	261
BCL7B	49	51	273	186	160	62
BCL7C	8	1	22	0	2	4
BCL9	199	105	122	135	581	295
BCL9L	13	8	28	22	19	48
BCLAF1	212	243	352	269	530	452
BCLP	0	2	3	0	0	0
BCMO1	0	0	2	2	0	2
BCNP1	1	0	0	1	1	1
BCOR	20	11	44	26	38	104
BCORL1	36	46	78	51	74	38
BCR	28	13	36	9	111	36
BCS1L	59	78	237	137	307	75
BDH	28	13	83	123	149	51
BDH1	30	28	242	45	37	4
BDH2	176	152	242	248	299	278
BDKRB1	0	0	3	5	0	0
BDKRB2	0	0	25	84	0	0
BDNF	17	32	39	22	159	26
BDP1	56	63	281	299	235	142
BECN1	80	74	222	220	353	149
BENE	0	0	0	77	0	1
BET1	76	59	498	279	82	65
BET1L	69	80	511	85	71	176
BET3L	0	0	3	1	1	4
Beta4GalNAc-T4	30	16	4	0	10	20
BEX1	15	21	1011	3664	1064	738
BEX2	15	21	1008	3654	1044	734
BEXL1	73	72	207	56	335	106
BF	0	0	15	27	0	0
BFAR	307	445	812	702	677	322
BFSP1	2	0	26	38	0	3
BG1	0	1	0	0	0	0
BGN	9	1	15	0	0	109
BGR	1	0	0	0	0	0
BHC80	56	38	61	53	49	85
BHLHB2	64	27	202	26	14	12
BHLHB3	17	21	71	78	418	14
BHLHB9	57	104	151	225	347	120
BHMT	0	0	35	0	1	2
BHMT2	4	2	8	39	0	1
BIC	8	5	47	146	30	2
BICC1	0	0	5	0	0	1
BICD1	50	36	103	53	156	46
BICD2	260	370	335	925	994	330
BID	84	38	217	547	99	42
BIK	0	0	4	0	0	1
BIN1	54	66	185	70	240	68
BIN2	0	1	1	1	2	1
BIN3	16	13	13	4	3	18
BIRC1	7	9	9	61	23	19
BIRC2	57	116	93	349	142	79
BIRC3	3	0	102	1233	8	0
BIRC4	250	337	672	376	217	61
BIRC4BP	0	0	9	6	0	0
BIRC5	63	39	527	394	183	253
BIRC6	259	275	358	563	874	307
Bit1	12	8	124	60	18	38
BIVM	33	34	68	350	160	62
BLCAP	22	12	56	47	78	36
Bles03	38	9	53	68	60	78
BLK	0	0	0	0	1	0
BLM	11	10	23	0	4	9
BLMH	75	76	306	197	137	123
BLNK	1	3	2	0	0	0
BLOC1S1	49	23	281	70	334	119
BLOC1S2	93	60	225	123	440	217
BLOC1S3	28	23	56	5	41	20
BLP1	67	40	47	117	268	65
BLP2	12	2	19	8	0	19
BLVRA	184	119	1133	459	278	135
BLVRB	174	330	1549	929	662	129
BLZF1	16	17	92	60	64	10
BM039	11	18	58	134	48	23
BM88	5	1	3	0	52	4
BMF	4	20	55	14	118	88
BMP1	36	6	47	12	22	27
BMP2	82	65	70	16	0	24
BMP2K	48	46	68	57	28	72
BMP4	1	0	3	0	3	7
BMP5	1	2	1	24	0	14
BMP6	8	5	4	9	0	2
BMP7	163	68	0	3	218	143
BMP8A	4	1	14	3	2	0
BMP8B	119	128	5	1	0	1
BMPER	60	36	0	26	0	0
BMPR1A	48	30	42	7	74	119
BMPR1B	5	3	9	2	55	42
BMPR2	183	172	134	170	409	145
BMS1L	34	30	61	30	91	49
BMSC-UbP	1	1	8	1	6	3
BMX	0	0	0	0	8	3
BNC2	11	3	48	9	58	44
BNIP1	2	3	30	1	5	13
BNIP2	68	58	389	168	388	147
BNIP3	120	84	346	165	180	126
BNIP3L	219	137	633	689	1038	866
BNIPL	0	0	10	1	0	5
BOC	44	44	180	289	254	153
BOK	0	0	8	22	89	20
BOLA1	16	8	208	94	55	65
BOLA3	68	73	419	726	301	117
BOLL	0	0	0	1	0	0
BOMB	83	92	372	562	226	89
BOP1	51	36	75	38	95	49
BPGM	52	48	64	6	11	6
BPHL	22	30	84	13	94	79
BPNT1	10	11	20	10	1	8
BPY2IP1	81	54	119	84	211	68
BRAF	12	10	42	68	30	9
BRAP	40	22	67	51	39	39
BRCA1	24	16	62	114	10	45
BRCA2	1	1	2	0	0	0
BRCC3	181	152	400	697	665	151
BRCTD1	0	0	1	0	0	0
BRD1	38	28	92	21	77	32
BRD2	178	133	507	152	318	236
BRD3	225	203	269	283	559	233
BRD4	818	696	964	2359	1562	1271
BRD7	302	442	429	598	471	260
BRD8	95	93	463	399	418	180
BRD9	62	19	30	38	92	43
BRDG1	1	0	0	1	1	0
BRDT	1	0	0	0	0	1
BRE	80	59	186	212	223	129
BRF1	61	52	65	90	229	119
BRF2	17	15	78	30	36	42
BRI3	773	903	4222	2267	2714	1192
BRI3BP	47	35	75	13	29	29
BRIP1	9	30	25	1	7	11
BRIX	2	0	3	9	5	1
BRLZ	0	0	14	39	17	12
BRMS1	74	18	171	5	69	45
BRMS1L	15	9	42	45	87	11
BRP44	61	106	646	1043	179	103
BRP44L	1106	1730	3547	1176	6230	439
BRPF1	17	2	38	30	69	29
BRPF3	44	76	153	70	145	58
BRRN1	95	115	470	487	152	161
BRSK1	3	1	1	0	0	0
BRSK2	17	2	14	0	0	23
BRUNOL4	2	0	8	2	8	6
BRUNOL5	22	45	16	46	1	17
BRUNOL6	0	1	0	0	0	6
BRWD1	50	68	51	317	143	148
BRWD2	189	429	378	213	355	280
BRWD3	37	39	43	59	52	17
BSCL2	123	50	78	20	213	33
BSDC1	28	9	42	5	32	12
BSG	502	184	905	56	262	178
BSN	3	7	0	9	8	9
BSPRY	2	1	4	0	2	2
BST1	13	8	18	11	0	2
BST2	0	1	391	236	1	1
BTAF1	143	125	356	158	183	190
BTBD1	342	393	668	493	2043	497
BTBD10	57	23	77	119	180	78
BTBD11	0	0	3	0	50	33
BTBD12	9	6	22	23	19	2
BTBD14A	34	25	47	95	25	16
BTBD14B	786	779	1627	2618	3049	896
BTBD15	65	26	155	204	80	156
BTBD2	154	64	189	167	317	320
BTBD3	872	734	583	439	308	438
BTBD4	0	4	3	0	0	8
BTBD5	10	8	11	10	26	0
BTBD6	9	7	53	1	12	33
BTBD7	151	160	235	452	578	205
BTBD9	29	19	80	94	127	110
BTC	149	130	169	241	97	80
BTD	23	35	149	6	39	12
BTF3	343	196	2098	392	495	879
BTF3L4	228	120	818	224	236	125
BTG1	311	274	1343	327	172	176
BTG2	35	23	32	64	74	65
BTG3	145	107	627	644	139	104
BTG4	0	0	1	0	0	0
BTLA	0	0	3	0	0	0
BTN2A1	188	197	321	840	610	166
BTN2A2	18	12	55	16	29	7
BTN2A3	3	0	9	0	0	3
BTN3A1	63	30	239	115	68	38
BTN3A2	172	172	450	238	162	63
BTN3A3	39	41	63	52	18	15
BTNL9	0	1	3	0	3	1
BTRC	59	67	60	40	196	74
BUB1	1994	1905	6908	4905	3905	4855
BUB1B	66	71	817	689	367	289
BUB3	357	474	1271	451	609	264
BUCS1	0	0	1	0	0	0
BVES	52	60	179	868	226	18
BXDC1	94	50	369	214	141	121
BXDC2	38	19	95	55	14	83
BXDC5	86	63	345	193	179	258
BXMAS2-10	0	0	0	0	0	1
BYSL	46	37	141	11	41	10
BZRAP1	1	0	0	0	4	4
BZRP	3460	3496	13708	4549	4319	2568
BZW1	464	361	873	1668	1959	1114
BZW2	443	345	526	1417	309	213
C10orf10	1	0	3	2	0	0
C10orf104	102	84	357	221	263	266
C10orf105	0	0	2	0	0	0
C10orf107	0	0	1	6	0	7
C10orf11	127	308	285	138	16	3
C10orf110	2	4	0	0	0	0
C10orf111	0	0	3	14	0	2
C10orf112	8	1	2	9	0	20
C10orf116	0	0	281	7	0	2
C10orf117	1	2	11	0	3	2
C10orf118	46	48	88	59	17	36
C10orf119	268	175	887	317	529	406
C10orf12	22	11	76	39	93	46
C10orf125	4	2	24	11	5	6
C10orf128	1	0	0	0	0	0
C10orf13	1405	1925	525	388	3848	3538
C10orf130	1	0	0	0	0	3
C10orf132	0	1	0	0	0	0
C10orf137	27	22	51	61	33	32
C10orf18	128	79	206	71	214	98
C10orf22	236	233	215	242	242	250
C10orf24	0	0	0	0	0	5
C10orf25	4	5	3	1	19	6
C10orf26	95	19	46	15	86	7
C10orf28	25	16	45	25	84	47
C10orf3	49	51	268	162	148	86
C10orf30	2	18	25	29	41	26
C10orf32	52	75	123	199	607	163
C10orf33	119	98	178	102	296	327
C10orf35	0	1	25	8	2	9
C10orf38	44	54	60	25	183	58
C10orf39	0	0	1	8	3	0
C10orf4	343	346	820	346	514	312
C10orf41	45	21	71	76	33	57
C10orf42	92	83	225	98	144	55
C10orf45	45	47	46	14	26	22
C10orf46	130	153	235	120	308	106
C10orf47	21	41	11	0	1	13
C10orf48	0	0	0	0	0	6
C10orf51	1	0	8	0	0	0
C10orf52	0	0	1	0	0	0
C10orf53	0	1	0	1	0	0
C10orf54	121	84	107	358	241	191
C10orf56	1219	777	366	165	778	232
C10orf57	144	71	225	204	204	236
C10orf58	1591	1784	1759	729	2040	577
C10orf59	3	9	54	59	11	9
C10orf6	66	72	94	55	114	200
C10orf61	106	105	93	134	326	117
C10orf63	9	10	1	29	112	27
C10orf65	0	0	2	0	15	1
C10orf7	140	181	348	149	463	228
C10orf70	225	206	621	359	200	182
C10orf72	33	35	9	9	5	49
C10orf74	92	58	352	52	355	107
C10orf75	35	30	86	15	35	29
C10orf76	10	7	25	11	13	16
C10orf77	17	3	6	5	13	3
C10orf78	20	28	32	34	103	14
C10orf79	0	1	16	12	6	11
C10orf80	0	0	1	2	0	5
C10orf81	114	96	341	241	180	204
C10orf82	1	0	3	0	0	2
C10orf83	34	40	90	59	65	46
C10orf84	41	82	98	142	124	93
C10orf86	204	237	646	390	563	336
C10orf87	2	4	0	0	0	0
C10orf88	42	26	39	27	49	31
C10orf89	20	2	12	5	7	8
C10orf9	244	206	348	320	1621	550
C10orf90	36	67	17	0	13	1
C10orf92	0	1	0	0	0	0
C10orf93	6	1	2	23	2	9
C10orf94	0	0	1	0	0	0
C10orf95	8	4	22	26	2	3
C10orf96	0	0	1	0	8	0
C10orf97	41	43	72	60	172	71
C11orf1	2003	1941	7000	5356	4005	4906
C11orf10	436	318	1040	547	518	1365
C11orf11	69	35	6	12	21	30
C11orf13	7	4	163	35	16	19
C11orf15	19	33	31	30	89	28
C11orf17	99	49	517	89	89	59
C11orf2	22	10	22	50	27	74
C11orf23	94	67	97	72	93	76
C11orf24	523	765	1045	772	1142	194
C11orf30	64	80	86	103	142	93
C11orf31	189	132	719	259	318	467
C11orf34	48	35	50	23	16	5
C11orf35	1	0	16	0	0	0
C11orf38	155	131	285	311	300	143
C11ORF4	3	1	6	2	3	2
C11orf43	0	0	1	0	0	474
C11orf45	0	0	1	4	0	0
C11orf46	8	0	68	19	15	14
C11orf47	0	0	5	0	0	1
C11orf48	166	148	194	88	100	180
C11orf49	21	18	60	55	108	99
C11orf51	50	37	101	8	106	84
C11orf54	38	13	127	31	41	80
C11orf55	6	4	12	15	53	19
C11orf56	17	15	10	7	16	4
C11orf8	1	0	0	0	0	0
C11orf9	14	15	22	14	0	11
C12orf10	213	168	376	184	467	108
C12orf11	25	23	50	0	43	11
C12orf14	25	23	74	10	125	55
C12orf2	11	6	12	14	20	32
C12orf22	45	36	110	84	128	42
C12orf23	1099	881	1751	3586	4154	1133
C12orf24	113	140	1241	174	121	177
C12orf26	4	4	2	9	6	17
C12orf29	76	58	97	88	92	30
C12orf30	44	34	282	275	78	83
C12orf31	12	6	124	51	65	20
C12orf32	73	81	360	160	133	173
C12orf34	17	7	8	0	2	0
C12orf35	44	35	53	15	11	23
C12orf38	5	0	31	52	43	9
C12orf39	0	0	1	0	0	1
C12orf4	48	46	87	162	122	67
C12orf41	46	22	147	70	102	78
C12orf43	3	2	16	13	7	10
C12orf44	28	16	89	68	15	49
C12orf45	22	37	58	39	34	0
C12orf46	376	308	1727	1139	734	925
C12orf47	41	25	105	33	18	41
C12orf48	33	34	127	173	57	50
C12orf49	20	15	87	3	19	9
C12orf5	99	80	179	116	651	91
C12orf52	77	53	364	266	201	65
C12orf53	20	4	4	0	27	77
C12orf57	118	129	922	100	1307	375
C12orf58	5	2	19	30	42	52
C12orf60	8	0	11	7	6	5
C12orf61	0	0	0	2	2	1
C12orf8	139	115	477	737	537	163
C13orf1	34	89	255	258	58	50
C13orf10	141	198	270	409	430	165
C13orf11	39	30	167	119	154	85
C13orf12	533	595	1647	734	1055	1330
C13orf17	20	14	27	10	2	17
C13orf18	35	20	8	1	0	1
C13orf21	12	7	5	10	6	7
C13orf22	28	12	6	10	8	9
C13orf23	26	15	37	7	29	37
C13orf24	68	40	61	75	118	58
C13orf25	3	13	10	15	13	21
C13orf3	10	20	73	39	15	24
C13orf6	214	197	138	147	306	148
C13orf7	84	89	181	312	228	134
C13orf8	598	392	1574	1471	1323	950
C13orf9	23	42	57	53	75	45
C14orf1	100	165	150	225	243	101
C14orf10	74	95	309	225	227	169
C14orf100	68	45	54	124	229	111
C14orf101	34	37	23	51	87	22
C14orf102	59	33	47	66	169	52
C14orf103	9	18	20	74	43	23
C14orf104	46	76	65	92	136	76
C14orf105	1	1	6	1	0	1
C14orf106	28	27	49	24	20	33
C14orf108	116	84	157	303	348	92
C14orf109	75	84	241	149	271	257
C14orf11	27	26	99	42	78	32
C14orf111	27	6	63	2	11	19
C14orf112	130	85	284	478	496	373
C14orf114	13	15	42	10	65	35
C14orf118	96	49	204	265	428	106
C14orf119	214	229	664	479	508	238
C14orf120	75	41	558	292	187	146
C14orf121	12	5	1	3	0	0
C14orf122	16	11	97	7	20	31
C14orf123	2	1	4	3	11	0
C14orf124	30	9	113	37	67	56
C14orf125	154	119	249	106	418	103
C14orf126	67	23	47	94	210	113
C14orf128	3	8	6	5	0	1
C14orf129	52	36	65	21	89	73
C14orf130	48	22	186	147	50	96
C14orf131	28	23	49	67	24	47
C14orf132	83	55	1	409	0	41
C14orf133	26	15	29	175	47	43
C14orf135	96	89	84	26	154	141
C14orf138	23	8	31	17	2	20
C14orf139	8	5	10	122	7	3
C14orf140	1	3	12	4	8	3
C14orf142	49	43	45	68	112	28
C14orf143	41	34	125	123	37	25
C14orf144	14	9	13	74	75	11
C14orf145	14	19	38	82	20	17
C14orf147	159	104	292	32	50	47
C14orf148	0	2	2	16	0	1
C14orf149	147	92	176	261	297	129
C14orf150	22	9	84	43	43	51
C14orf151	26	6	127	45	54	18
C14orf152	3	0	0	0	1	30
C14orf153	149	61	150	84	231	77
C14orf154	7	11	16	19	2	8
C14orf156	261	129	448	502	237	144
C14orf159	25	31	172	301	161	130
C14orf160	27	26	177	53	55	28
C14orf162	0	0	0	0	23	1
C14orf166	282	259	899	2165	842	484
C14orf167	28	17	46	21	33	54
C14orf168	70	51	56	122	176	145
C14orf169	17	9	24	60	45	51
C14orf171	0	0	0	1	0	0
C14orf172	25	23	28	31	60	13
C14orf173	10	2	10	4	5	1
C14orf2	921	1061	3772	1580	2752	1670
C14orf20	0	0	1	0	0	0
C14orf21	4	2	2	0	3	0
C14orf24	262	273	366	720	958	238
C14orf25	2	0	0	0	0	2
C14orf27	0	0	0	1	0	0
C14orf28	10	8	21	16	7	18
C14orf29	1	0	1	0	0	0
C14orf31	82	53	27	13	34	28
C14orf32	159	179	487	407	491	329
C14orf34	0	0	7	0	1	0
C14orf35	20	58	48	108	38	97
C14orf37	52	53	9	58	171	73
C14orf39	3	3	14	24	26	4
C14orf4	296	188	468	666	1622	1197
C14orf43	15	20	57	48	24	38
C14orf44	4	9	23	49	17	27
C14orf45	47	43	62	75	71	41
C14orf46	9	8	24	19	34	13
C14orf49	47	23	30	48	14	35
C14orf50	2	0	0	4	0	1
C14orf54	2	0	2	0	0	0
C14orf58	6	3	9	0	0	4
C14orf65	18	25	83	144	36	47
C14orf72	0	0	9	0	0	0
C14orf78	0	0	6	28	1	3
C14orf79	31	31	38	38	77	24
C14orf8	0	0	0	0	1	0
C14orf80	40	37	23	21	60	12
C14orf82	2	0	4	0	1	0
C14orf85	3	0	3	0	0	1
C14orf86	3	14	17	25	45	15
C14orf87	16	7	29	90	47	10
C14orf9	17	7	49	15	9	21
C14orf92	50	44	112	44	89	48
C14orf93	6	5	32	49	16	28
C14orf94	47	58	243	94	79	54
C15orf12	1	0	8	0	2	0
C15orf15	167	207	1362	175	436	550
C15orf16	0	0	2	0	0	0
C15orf17	17	12	48	42	84	70
C15orf20	14	26	26	6	40	22
C15orf21	3	6	51	44	8	29
C15orf23	69	196	666	385	524	162
C15orf24	78	102	840	193	380	117
C15orf25	7	10	168	64	144	54
C15orf26	0	0	0	0	0	1
C15orf27	2	8	2	2	3	3
C15orf29	110	69	474	196	532	318
C15orf33	0	4	4	0	2	4
C15orf38	0	1	0	0	3	5
C15orf39	4	1	20	5	17	3
C15orf40	18	53	96	245	207	44
C15orf41	15	15	63	54	42	17
C15orf42	2	5	9	6	6	25
C15orf44	66	104	181	158	311	132
C15orf48	0	0	0	26	6	0
C16orf24	44	1	50	0	40	12
C16orf28	3	1	15	2	4	2
C16orf33	164	134	192	196	604	243
C16orf34	278	200	347	322	786	406
C16orf35	207	186	254	415	431	242
C16orf40	1	3	2	0	17	4
C16orf44	22	30	114	141	169	40
C16orf45	203	153	75	449	416	172
C16orf46	6	3	19	45	47	10
C16orf48	15	9	31	17	31	16
C16orf5	123	115	221	102	217	174
C16orf50	0	0	0	0	0	2
C16orf51	29	17	88	79	30	78
C16orf52	52	48	367	105	91	36
C16orf53	68	66	186	120	124	92
C16orf56	43	14	52	14	23	18
C16orf57	482	533	389	1014	580	275
C16orf58	102	97	281	270	447	81
C16orf59	23	8	30	6	13	18
C16orf60	58	88	756	610	240	336
C16orf61	199	152	629	397	254	113
C16orf63	8	21	138	56	34	26
C16orf7	53	8	64	39	51	59
C16orf9	359	248	265	210	648	201
C17orf12	0	1	0	0	0	0
C17orf25	154	123	292	430	316	206
C17orf27	107	53	335	97	81	59
C17orf28	35	10	48	12	23	19
C17orf31	4	0	3	1	4	3
C17orf32	83	51	76	33	66	24
C17orf35	2	0	8	0	4	0
C17orf37	110	142	333	93	217	120
C17orf39	40	24	91	19	94	22
C17orf40	44	63	206	221	150	44
C17orf41	0	0	13	1	0	4
C17orf42	40	92	97	143	101	17
C17orf44	13	8	93	17	6	5
C17orf45	1048	901	5019	3500	2909	4114
C17orf48	0	0	15	13	17	8
C17orf49	20	15	37	24	40	63
C17orf51	2	0	14	5	3	5
C17orf53	5	2	17	3	7	8
C17orf56	0	0	0	0	0	0
C17orf57	7	3	21	4	2	13
C17orf58	17	12	100	22	10	13
C17orf59	48	42	57	23	15	16
C17orf62	18	2	27	8	15	54
C17orf63	5	1	4	0	0	0
C17orf64	1	0	0	0	0	0
C17orf65	8	2	2	0	3	6
C17orf68	30	30	34	47	80	14
C17orf69	2	1	4	2	0	6
C17orf70	38	9	26	5	39	72
C17orf71	1	0	3	14	10	4
C17orf75	20	31	111	96	28	58
C17orf79	37	68	235	152	109	58
C17orf80	27	9	28	10	23	29
C17orf81	528	432	899	618	1297	540
C18orf1	31	53	10	20	0	11
C18orf10	377	372	827	1117	1465	598
C18orf11	9	9	6	7	23	31
C18orf14	18	30	15	92	178	12
C18orf17	155	178	867	429	152	69
C18orf19	14	13	37	13	29	9
C18orf21	150	122	226	311	187	173
C18orf22	81	53	301	223	143	126
C18orf24	4	1	29	3	8	5
C18orf25	28	21	90	32	26	39
C18orf26	20	17	62	13	25	15
C18orf30	0	0	0	0	6	0
C18orf37	29	18	75	50	60	39
C18orf4	144	77	44	245	150	64
C18orf43	3	6	36	30	4	5
C18orf45	40	16	96	32	37	44
C18orf49	8	19	36	21	14	17
C18orf54	28	21	64	39	55	46
C18orf55	270	290	685	1114	583	317
C18orf57	0	0	0	1	0	0
C18orf8	57	63	360	442	99	26
C18orf9	11	6	63	21	4	28
C19orf10	195	93	464	259	97	258
C19orf12	98	113	269	210	500	112
C19orf13	210	177	143	55	236	261
C19orf14	4	4	0	0	0	1
C19orf15	1	1	12	0	4	6
C19orf18	4	2	5	0	0	2
C19orf19	2	0	1	0	0	0
C19orf2	289	341	693	242	277	182
C19orf20	38	17	37	10	94	45
C19orf22	31	6	40	19	45	22
C19orf23	2	1	2	1	4	1
C19orf24	33	54	420	63	71	50
C19orf25	15	6	63	8	31	12
C19orf26	1	0	2	0	0	0
C19orf27	7	4	9	27	5	8
C19orf28	66	7	83	3	14	21
C19orf29	148	94	254	376	120	163
C19orf30	1	0	0	0	14	31
C19orf33	0	0	3	0	0	0
C19orf35	1	0	0	0	0	0
C19orf36	10	3	25	0	12	21
C19orf37	636	693	167	313	1525	566
C19orf4	197	169	92	249	266	124
C19orf6	77	10	28	5	3	77
C19orf7	51	53	37	35	97	119
C1D	77	61	338	134	311	192
C1GALT1	101	94	165	148	104	59
C1GALT1C1	45	46	72	91	127	51
C1GALT2	14	8	45	34	34	41
C1orf1	0	1	1	5	3	2
C1orf101	0	0	0	1	0	2
C1orf102	13	18	94	60	128	47
C1orf103	111	87	152	29	33	60
C1orf105	7	0	0	0	0	7
C1orf106	25	5	2	10	4	11
C1orf107	4	2	19	25	11	1
C1orf108	5	9	7	10	2	8
C1orf109	34	21	258	296	49	136
C1orf112	8	0	26	7	0	10
C1orf114	5	14	1	4	2	11
C1orf115	0	0	0	0	0	2
C1orf116	0	0	3	0	0	0
C1orf117	0	0	32	0	0	3
C1orf119	11	11	113	7	40	37
C1orf121	192	139	1352	554	750	223
C1orf122	502	303	525	324	975	204
C1orf123	178	298	377	367	499	99
C1orf124	7	7	16	14	17	2
C1orf125	0	0	1	0	0	0
C1orf126	0	0	1	0	0	1
C1orf128	503	475	2951	1249	2041	585
C1orf130	0	0	0	0	0	1
C1orf131	58	33	121	126	101	54
C1orf133	6	17	85	364	0	34
C1orf135	4	4	11	7	7	6
C1orf136	1	0	0	0	0	0
C1orf14	5	1	30	0	13	6
C1orf142	84	63	223	145	106	112
C1orf144	196	208	762	353	896	397
C1orf149	2445	2079	6608	8699	5189	6445
C1orf151	268	199	1241	788	391	214
C1orf152	0	0	2	0	0	0
C1orf155	20	12	87	15	15	22
C1orf156	16	2	15	0	0	5
C1orf157	0	0	0	7	0	0
C1orf158	0	0	1	0	0	0
C1orf159	57	46	78	34	66	29
C1orf16	36	44	71	28	250	65
C1orf160	45	19	89	36	64	36
C1orf162	2	2	11	3	0	2
C1orf163	4	2	17	1	3	1
C1orf164	367	214	1061	459	913	1255
C1orf165	72	85	15	178	36	117
C1orf166	7	4	36	8	8	30
C1orf167	0	0	0	0	0	2
C1orf170	1	0	1	0	0	0
C1orf171	23	21	127	56	79	29
C1orf173	0	0	8	28	1	0
C1orf174	98	81	1033	369	263	211
C1orf175	0	0	4	0	3	0
C1orf176	3	6	0	53	42	7
C1orf181	18	13	64	193	69	62
C1orf182	2	2	3	0	0	0
C1orf183	2	1	0	0	6	1
C1orf187	188	74	168	38	93	113
C1orf19	106	87	389	188	225	130
C1orf192	2	0	2	0	0	2
C1orf198	45	75	90	82	395	152
C1orf2	102	73	302	132	115	174
C1orf201	0	0	71	1	72	1
C1orf21	219	188	182	128	212	106
C1orf22	59	93	183	46	153	51
C1orf24	45	41	515	466	77	15
C1orf25	20	15	149	75	51	29
C1orf26	12	5	14	8	5	15
C1orf27	42	40	188	82	106	55
C1orf31	21	13	22	9	8	16
C1orf32	0	2	0	0	0	1
C1orf33	50	37	264	435	261	149
C1orf34	0	0	22	4	0	0
C1orf35	56	36	132	56	86	161
C1orf36	0	0	0	0	0	4
C1orf37	92	93	275	148	312	59
C1orf38	2	0	32	41	0	4
C1orf40	12	1	4	0	0	0
C1orf41	327	310	5069	2917	2151	1385
C1orf43	112	88	285	235	157	266
C1orf48	156	121	237	514	725	228
C1orf50	24	15	77	32	54	42
C1orf51	40	42	135	33	27	41
C1orf52	358	356	1639	825	826	671
C1orf54	36	28	10	14	121	32
C1orf55	12	17	36	74	22	12
C1orf56	77	70	29	28	15	77
C1orf57	4	8	7	13	26	6
C1orf58	0	0	0	0	0	1
C1orf59	0	0	0	0	0	1
C1orf60	29	31	48	12	37	87
C1orf61	207	354	1	3	173	31
C1orf62	4	1	2	4	0	0
C1orf63	297	259	277	466	199	179
C1orf66	96	112	846	654	291	657
C1orf67	1	0	0	3	12	4
C1orf71	32	5	50	26	45	59
C1orf73	46	6	55	27	33	35
C1orf74	0	0	0	0	3	1
C1orf75	80	54	125	75	110	50
C1orf76	0	0	1	0	0	0
C1orf77	67	47	466	430	132	122
C1orf78	17	8	177	70	117	125
C1orf79	28	22	600	260	86	66
C1orf8	126	93	182	419	753	199
C1orf80	348	288	697	533	429	285
C1orf82	9	4	38	9	5	7
C1orf83	4	3	20	14	17	4
C1orf84	0	0	0	1	0	0
C1orf85	19	11	62	0	10	26
C1orf86	271	198	559	244	1361	181
C1orf88	0	0	0	0	8	1
C1orf89	1	0	11	2	17	1
C1orf9	83	74	301	106	495	91
C1orf90	0	0	1	0	0	0
C1orf91	17	7	68	86	136	42
C1orf92	0	1	0	0	0	1
C1orf93	61	41	69	156	230	171
C1orf94	6	22	0	48	0	0
C1orf96	38	31	30	21	11	7
C1orf97	16	13	92	105	52	31
C1QB	2	0	0	0	0	1
C1QBP	860	1748	3786	3660	4078	1441
C1QC	0	1	0	1	0	1
C1QDC1	1944	1334	5211	5439	3986	3571
C1QDC2	2	0	7	0	0	2
C1QG	4	3	31	33	13	14
C1QL1	59	5	22	0	8	2
C1QL4	2	0	4	0	0	0
C1QTNF1	3	5	10	11	5	0
C1QTNF2	4	0	0	0	0	0
C1QTNF3	142	60	5	5	0	5
C1QTNF4	3	1	1	0	3	16
C1QTNF5	26	10	4	4	4	20
C1QTNF6	759	578	132	172	405	246
C1QTNF7	0	0	0	0	2	0
C1R	46	19	66	74	9	13
C1RL	28	36	54	132	54	56
C1S	8	19	33	418	13	23
C2	6	6	91	90	1	15
C20orf10	9	8	53	48	42	64
C20orf100	5	0	36	57	38	41
C20orf102	0	1	14	16	59	40
C20orf103	6	5	0	75	0	2
C20orf106	0	0	1	0	0	0
C20orf108	449	163	186	74	62	62
C20orf11	55	48	234	153	162	162
C20orf111	83	80	748	236	212	97
C20orf112	47	61	49	69	184	234
C20orf114	5	2	5	3	2	3
C20orf116	90	89	659	37	157	64
C20orf117	67	50	166	332	148	179
C20orf118	0	0	1	17	0	3
C20orf119	36	39	166	93	110	72
C20orf12	2	3	11	27	15	7
C20orf121	22	17	138	216	88	69
C20orf123	0	0	1	0	0	1
C20orf127	24	7	148	5	47	20
C20orf128	0	0	1	0	0	0
C20orf129	80	73	612	647	294	79
C20orf13	5	1	8	1	0	1
C20orf132	9	15	21	4	12	15
C20orf133	1998	1910	6838	4843	3957	4862
C20orf135	7	3	17	26	25	26
C20orf139	2	2	9	0	6	3
C20orf14	54	50	174	283	216	72
C20orf141	0	0	1	0	1	0
C20orf142	0	2	0	0	0	0
C20orf144	0	1	1	0	0	4
C20orf149	304	140	1768	76	564	312
C20orf155	214	247	1632	1009	638	429
C20orf160	0	1	0	0	0	3
C20orf161	11	11	60	34	28	16
C20orf17	39	37	115	43	1	10
C20orf172	92	63	777	404	204	133
C20orf177	71	100	229	51	140	109
C20orf178	4	3	28	2	4	8
C20orf18	42	16	547	52	29	49
C20orf186	1	0	0	0	0	0
C20orf19	63	100	100	246	69	54
C20orf194	286	226	481	186	595	355
C20orf195	7	3	5	0	8	8
C20orf20	26	21	82	2	9	40
C20orf22	317	232	544	334	353	147
C20orf23	75	85	54	8	33	18
C20orf24	141	117	1707	566	673	310
C20orf26	1	0	0	0	0	4
C20orf27	99	94	241	86	173	58
C20orf28	1	0	2	0	0	0
C20orf29	39	32	108	61	39	9
C20orf3	4841	3944	4325	5482	4100	1730
C20orf30	275	378	1225	1351	1414	487
C20orf31	42	40	70	33	64	19
C20orf32	3	0	2	0	0	1
C20orf35	82	36	581	210	274	188
C20orf36	67	37	34	30	63	49
C20orf38	0	0	6	0	0	0
C20orf39	219	120	11	38	459	25
C20orf4	194	198	261	779	508	128
C20orf40	219	166	938	739	375	587
C20orf42	7	4	65	54	1	7
[truncated: 16,761 more rows]
