# Supplementary material for: Differential expression analysis for sequence count data
Source: Genome Biol. 2010 Oct 27;11(10):R106. doi: 10.1186/gb-2010-11-10-r106 (PMC3218662; doi:10.1186/gb-2010-11-10-r106)
Supplement: Additional file 3 — Raw data. Tarball containing the raw data for the presented analyses. [file gb-2010-11-10-r106-S3.TGZ › suppl_data/PolII_counts.tsv]

id	chrom	start	stop	10847_2	10847_3	10847_4	12878_1	12878_2	12878_3	12878_4	12878_6	12878_7	12891_1	12891_2	12891_3	12891_4	12891_5	12891_6	12892_1	12892_2	12892_3	15510_1	15510_2	15510_3	18505_1	18505_2	18505_3	18505_4	18526_1	18526_2	18526_3	18951_1	18951_2	18951_3	18951_4	19099_1	19099_2	19099_3	19193_1	19193_2	19193_3	19193_4
0	chr1	703615	704507	131	231	158	108	71	74	82	119	139	68	126	116	56	51	49	216	302	128	147	253	92	142	142	91	149	132	88	145	160	253	455	170	165	170	153	65	104	102	70
1	chr1	752153	753162	43	38	67	32	31	25	29	31	21	16	16	14	10	14	14	70	85	46	71	92	37	54	48	39	47	42	48	44	42	107	166	52	88	69	43	41	41	38	43
2	chr1	829805	830887	19	38	25	46	41	26	38	12	21	23	34	25	11	11	12	59	62	17	24	31	30	10	17	5	11	5	6	11	42	76	131	62	79	77	56	13	16	19	10
3	chr1	884146	884684	65	130	82	44	41	27	54	29	30	35	68	37	11	20	27	96	156	57	70	126	47	99	67	32	56	72	46	67	64	91	165	52	88	99	74	48	73	62	60
4	chr1	885683	886084	29	49	16	17	9	7	8	5	6	7	12	12	2	2	4	43	54	13	38	63	16	29	16	11	13	10	12	20	23	48	66	14	15	29	30	12	15	12	24
5	chr1	891561	892471	51	93	30	32	16	13	21	10	20	17	27	24	18	9	10	70	98	24	43	77	30	41	41	20	36	23	19	57	46	70	88	44	28	47	52	23	29	46	29
6	chr1	925116	926314	111	151	52	28	31	28	39	11	15	4	10	10	6	4	6	16	24	6	29	100	31	16	33	9	38	34	40	82	70	133	188	52	107	81	87	40	35	60	29
7	chr1	927015	927339	33	31	14	9	8	9	6	2	7	1	2	3	1	2	0	10	13	3	0	5	4	4	7	2	7	12	3	15	20	28	30	6	21	18	14	16	7	15	12
8	chr1	938130	941126	478	835	537	161	121	169	206	347	364	322	461	419	170	192	196	529	810	385	312	425	416	403	477	202	550	591	399	806	319	487	936	333	512	691	676	403	588	654	299
9	chr1	944510	945795	67	147	71	31	18	16	26	16	25	6	27	16	10	5	10	84	104	22	85	118	42	71	66	20	46	52	48	82	93	130	141	56	148	89	81	53	70	69	31
10	chr1	958289	958813	45	86	22	17	13	14	11	6	10	4	17	11	5	10	8	54	61	13	32	59	13	29	38	6	23	19	27	52	40	41	69	23	34	23	44	6	30	32	13
11	chr1	965861	966209	26	45	12	7	10	0	9	3	6	2	2	5	2	6	1	17	32	8	12	33	5	19	20	5	17	15	9	25	14	32	38	14	20	6	8	2	12	16	8
12	chr1	984296	985192	56	123	36	28	22	7	33	15	20	10	14	15	9	4	8	52	79	23	41	68	24	45	45	16	38	29	31	52	28	74	87	24	43	47	64	18	35	39	11
13	chr1	988849	989944	92	95	60	59	40	45	59	39	45	24	51	42	30	22	32	145	166	34	75	72	27	30	105	28	81	81	36	81	48	67	138	53	126	91	100	48	117	158	48
14	chr1	994173	994726	38	66	15	21	11	19	21	20	27	16	26	17	11	6	7	60	71	23	19	61	20	40	48	17	40	34	17	34	24	29	69	30	30	42	54	16	38	44	17
15	chr1	1041073	1041418	18	44	30	11	8	6	12	10	15	8	16	9	8	3	4	22	38	16	24	34	9	20	15	7	21	16	15	24	21	19	43	11	18	25	27	6	10	19	14
16	chr1	1069262	1069967	36	55	27	4	6	11	16	14	9	24	28	31	11	11	11	66	89	24	51	43	12	36	51	11	35	26	13	29	16	33	35	17	43	38	56	20	50	51	19
17	chr1	1082615	1084066	131	239	160	90	76	61	95	63	94	74	124	92	38	46	42	208	282	116	177	180	108	218	189	86	182	163	107	154	113	185	269	88	218	227	203	111	157	147	88
18	chr1	1156304	1157989	236	503	205	162	87	58	102	53	80	55	107	94	42	36	54	420	479	122	250	337	149	358	228	94	220	148	154	244	309	442	472	157	390	291	178	220	254	224	138
19	chr1	1198756	1199635	123	235	121	65	48	16	37	20	34	13	54	50	24	12	11	169	235	62	129	234	57	153	104	41	72	82	83	103	111	195	216	71	156	152	109	62	97	69	63
20	chr1	1230603	1231285	49	98	38	29	19	22	19	16	26	19	29	24	9	15	10	54	84	25	21	62	13	16	21	13	18	47	19	35	27	49	66	22	44	44	60	16	36	46	21
21	chr1	1232926	1234250	90	264	96	89	55	29	49	35	32	26	59	36	12	18	21	155	224	64	108	208	59	164	85	43	69	78	72	84	86	185	222	76	132	113	110	79	92	84	98
22	chr1	1249529	1250410	139	319	128	68	58	40	62	4	5	42	84	70	28	30	31	135	274	99	150	297	68	208	151	66	116	100	93	135	116	200	294	102	178	169	146	81	163	107	114
23	chr1	1254523	1255677	29	69	26	41	27	18	23	0	0	31	64	60	22	33	30	45	64	33	21	43	9	82	41	18	66	35	10	20	19	40	46	10	24	10	52	23	48	52	7
24	chr1	1274185	1275232	124	266	78	88	49	30	26	19	29	21	48	26	13	11	18	208	245	49	171	251	74	160	138	37	94	50	51	107	120	188	260	69	172	204	109	93	94	69	70
25	chr1	1300003	1301075	155	317	183	144	94	64	113	11	11	115	172	159	74	90	73	221	415	160	219	281	105	290	226	114	210	149	134	179	156	252	346	121	277	250	249	130	196	200	134
26	chr1	1301291	1302069	18	22	30	24	19	24	29	0	0	29	55	36	20	23	32	16	51	28	16	21	13	50	45	27	47	27	15	15	14	21	31	11	38	25	42	17	57	50	20
27	chr1	1324115	1328145	299	713	386	337	234	219	267	41	37	349	516	457	225	197	229	461	699	365	371	537	241	632	509	280	550	377	271	383	305	525	695	262	500	385	545	301	625	610	328
28	chr1	1328827	1329389	7	2	17	13	16	18	32	0	0	35	39	32	17	17	15	7	14	18	10	9	10	18	10	17	33	6	6	12	7	7	17	15	18	6	25	9	13	14	14
29	chr1	1331524	1333311	280	589	239	225	148	117	161	9	9	125	209	163	86	70	96	383	650	200	298	475	156	421	399	167	355	267	173	276	241	420	556	180	456	332	315	221	389	376	185
30	chr1	1336828	1337289	7	25	6	11	12	6	12	0	0	30	31	31	14	8	12	24	25	10	14	10	2	18	9	7	16	6	5	11	8	15	16	8	2	0	14	1	11	13	12
31	chr1	1360672	1361137	11	31	11	4	3	1	11	0	0	2	1	1	2	1	0	6	13	0	12	20	6	11	4	3	5	11	5	15	14	22	68	10	14	32	25	18	11	9	11
32	chr1	1387448	1388267	7	22	8	37	26	28	34	1	0	2	7	6	4	1	2	90	137	62	39	67	9	13	6	1	12	23	6	20	11	15	8	1	17	38	25	0	9	11	1
33	chr1	1396487	1397252	84	325	101	60	62	36	42	4	5	45	118	78	37	27	33	174	284	58	110	202	65	202	136	39	96	94	71	93	140	148	192	58	99	101	155	57	139	105	82
34	chr1	1436136	1437636	138	307	163	127	77	66	95	46	71	75	116	93	37	51	64	193	302	114	161	276	96	170	134	65	130	140	108	154	136	251	331	100	222	168	185	100	158	130	124
35	chr1	1486576	1487919	36	34	21	35	19	21	34	38	19	35	33	38	14	13	22	38	44	18	24	18	4	44	52	14	74	31	12	16	20	23	39	5	13	13	16	32	56	77	23
36	chr1	1499311	1500907	230	604	258	187	116	75	150	105	135	134	244	206	93	79	112	426	593	207	278	385	176	387	390	149	323	220	181	252	215	388	524	185	407	320	365	198	359	332	196
37	chr1	1540342	1541685	200	435	165	88	93	53	76	71	84	47	101	92	63	36	51	315	395	81	273	371	110	276	286	70	160	147	125	184	220	330	402	121	205	272	177	159	212	178	135
38	chr1	1555532	1555956	24	43	17	16	16	8	19	8	10	4	17	11	4	3	4	43	52	17	35	38	12	28	28	16	33	14	17	17	23	30	49	8	24	44	28	14	33	22	26
39	chr1	1580104	1580740	33	294	47	21	15	19	21	14	17	106	156	124	70	68	91	155	283	30	51	54	29	244	173	18	172	43	23	49	94	58	73	25	56	70	187	36	134	153	37
40	chr1	1599029	1600326	55	110	57	72	47	43	66	52	40	51	74	72	35	55	53	69	104	57	48	62	33	99	62	53	105	51	30	61	48	86	137	29	84	63	109	60	103	106	65
41	chr1	1613673	1614658	31	726	36	25	18	18	16	8	20	184	373	257	125	121	157	287	499	26	45	106	40	421	322	25	255	41	40	49	261	73	76	28	22	18	304	29	286	302	43
42	chr1	1645397	1646029	68	112	64	50	37	36	46	54	50	49	61	51	32	28	36	133	153	74	61	109	47	117	114	69	105	69	51	67	67	96	171	40	103	70	77	55	88	86	53
43	chr1	1666919	1667916	25	39	40	19	23	14	22	14	15	6	10	8	6	3	5	46	48	25	8	16	7	7	3	4	3	14	23	25	19	49	69	19	87	95	60	18	17	20	15
44	chr1	1699392	1702279	281	534	280	226	133	139	150	112	97	131	229	182	111	114	104	393	509	183	281	432	179	396	309	149	290	205	213	311	245	479	550	172	317	347	316	211	309	308	182
45	chr1	1703634	1704986	45	59	52	55	19	24	35	32	28	62	78	89	42	28	35	64	102	39	53	63	25	84	51	37	71	44	35	27	35	46	82	35	20	23	65	35	70	73	31
46	chr1	1811171	1813245	218	426	210	110	65	40	53	58	83	58	115	76	53	37	36	317	451	130	261	343	108	288	211	101	191	110	132	171	250	334	363	132	238	253	141	128	159	152	116
47	chr1	1829664	1830874	117	270	123	80	51	38	51	21	48	35	70	68	15	16	25	151	240	70	110	238	58	163	116	62	86	80	87	137	105	153	267	103	130	146	124	94	102	99	71
48	chr1	1971215	1971540	16	59	23	0	2	4	3	4	5	1	3	2	1	1	0	15	29	14	6	19	1	28	11	12	17	3	2	5	3	5	15	5	2	2	1	3	2	8	3
49	chr1	2110616	2111349	55	90	42	21	20	11	24	26	24	31	54	40	16	13	19	12	6	3	67	97	32	33	24	12	18	5	3	2	21	34	34	23	50	67	59	16	32	32	14
50	chr1	2115713	2116867	118	246	133	61	57	28	46	28	34	43	81	56	25	32	35	172	226	82	150	149	63	146	118	67	116	72	82	113	140	188	234	82	178	179	135	74	102	88	76
51	chr1	2120303	2121088	60	118	75	47	28	39	34	32	27	65	83	73	39	38	45	17	29	6	26	57	17	66	53	33	49	32	35	45	64	93	249	78	101	118	153	43	20	54	14
52	chr1	2126576	2127001	18	38	9	6	3	2	4	10	6	6	11	5	3	2	2	10	21	3	20	25	19	27	16	10	15	7	5	18	19	20	41	11	16	20	21	7	15	11	5
53	chr1	2148292	2149575	171	364	144	100	53	31	43	21	64	17	65	30	17	17	11	314	317	103	190	257	105	235	144	61	119	87	111	197	196	295	283	122	248	246	134	123	128	130	112
54	chr1	2221314	2222940	172	263	176	77	60	57	84	107	100	151	172	162	78	84	109	196	299	131	153	143	147	239	193	108	285	149	119	169	91	161	195	59	234	222	237	85	244	258	96
55	chr1	2235862	2236749	24	39	29	3	2	2	2	6	12	8	12	4	3	6	3	24	16	8	10	13	14	14	22	10	24	12	11	25	12	19	20	11	42	39	20	11	25	28	15
56	chr1	2309081	2309961	8	11	10	15	21	22	31	45	31	10	10	4	4	11	6	24	60	47	38	40	5	15	6	4	10	24	13	30	3	11	27	14	3	1	9	20	32	40	14
57	chr1	2312537	2313578	153	336	132	91	50	52	59	27	34	39	94	74	41	12	37	186	269	82	126	239	91	266	173	62	131	117	95	149	170	242	309	70	196	204	163	97	154	145	103
58	chr1	2333348	2336064	156	312	164	148	110	55	89	46	89	66	129	103	45	45	57	231	361	111	207	394	88	261	177	66	122	171	141	190	155	270	337	140	232	184	238	92	178	173	135
59	chr1	2336729	2337833	41	84	40	27	14	17	25	29	22	41	58	54	35	15	19	96	111	56	52	63	30	85	64	36	65	45	40	45	51	58	87	29	63	58	82	22	59	53	30
60	chr1	2447303	2448535	89	179	84	71	53	44	71	66	68	47	73	67	33	28	31	142	209	73	108	163	51	144	137	43	112	83	58	109	65	106	199	68	132	119	136	58	117	112	78
61	chr1	2467156	2471430	562	1491	530	384	326	280	389	448	472	395	694	519	269	263	288	1316	1975	498	688	963	387	1012	1290	401	1218	581	390	698	515	795	1175	445	694	868	1009	394	843	1079	394
62	chr1	2475306	2475841	16	22	6	7	10	9	4	6	10	11	13	17	8	11	7	20	42	7	11	9	3	13	23	6	24	6	4	8	9	12	15	6	20	11	22	4	12	23	4
63	chr1	2477222	2479247	56	60	51	52	38	45	40	50	58	76	89	67	38	41	34	75	121	36	56	43	20	62	113	58	101	44	39	45	34	58	102	31	58	50	107	37	62	122	43
64	chr1	2482900	2483901	12	13	13	20	22	8	19	12	9	17	16	16	5	9	10	28	24	13	14	11	7	19	27	7	27	15	6	22	9	16	23	13	23	9	31	5	32	49	7
65	chr1	2485497	2488108	223	389	293	171	148	124	178	195	183	190	241	217	123	140	115	386	568	220	261	356	168	305	420	190	463	254	192	304	210	307	610	201	338	362	483	196	313	387	207
66	chr1	2497183	2500503	217	228	232	238	223	234	272	248	175	114	153	134	68	81	98	321	480	333	261	332	158	220	245	190	321	215	176	239	116	235	446	153	261	260	285	98	193	227	96
67	chr1	2504609	2508628	184	380	247	162	164	125	173	178	184	171	267	240	130	124	130	359	476	212	264	391	147	258	263	143	274	217	135	237	207	289	464	173	256	281	309	171	256	281	194
68	chr1	2563541	2564690	92	218	88	45	47	21	25	46	50	29	79	55	46	23	23	177	217	71	114	216	58	163	149	38	112	86	68	86	94	160	254	84	80	129	107	72	100	142	86
69	chr1	3556015	3556873	39	139	93	57	46	37	53	45	40	41	67	55	36	25	34	126	166	55	94	156	48	132	134	49	100	56	65	64	79	101	190	72	82	85	91	68	74	51	45
70	chr1	3557708	3559714	46	132	37	92	41	15	46	23	38	8	15	14	15	3	8	91	96	26	107	193	24	141	67	36	54	52	54	41	94	157	170	33	73	58	55	85	51	44	50
71	chr1	3561713	3564184	14	38	49	115	88	99	135	73	54	102	91	105	47	55	59	40	49	69	27	54	46	81	41	74	136	35	22	41	13	47	74	20	50	35	77	45	31	66	33
72	chr1	3570549	3574498	57	95	125	155	123	155	207	149	78	165	161	164	78	76	70	111	168	216	52	149	103	127	79	131	217	101	101	100	64	154	254	82	125	102	210	90	122	153	113
73	chr1	3579059	3581075	20	50	29	144	115	116	143	72	60	34	40	30	28	34	25	85	131	91	57	73	15	80	82	39	126	49	30	34	32	38	118	21	73	76	103	59	96	125	60
74	chr1	3623573	3626286	26	66	41	61	12	21	16	28	28	26	25	21	9	14	11	36	46	39	29	98	19	89	36	39	34	25	22	32	44	73	86	15	21	8	46	34	24	21	26
75	chr1	3653269	3654097	30	130	47	34	22	13	29	17	27	23	45	30	13	6	19	76	127	32	56	104	27	83	61	30	45	52	38	50	62	73	111	27	71	42	69	43	82	45	35
76	chr1	3678374	3679241	38	83	34	19	11	5	16	14	12	6	20	10	5	2	8	27	34	17	43	94	19	45	30	18	24	23	29	43	34	50	54	20	35	35	23	26	29	17	22
77	chr1	3702313	3703732	121	283	161	122	60	60	91	51	72	112	184	126	75	48	62	219	338	136	153	227	111	236	172	100	154	130	123	154	148	244	270	90	221	185	178	112	164	161	99
78	chr1	3763173	3764430	103	231	87	75	52	33	44	45	57	45	102	59	44	26	41	163	213	94	103	277	58	165	111	67	65	81	72	122	72	140	297	110	88	115	119	55	96	65	69
79	chr1	3806005	3808136	164	382	165	115	94	73	97	92	106	102	186	136	64	56	56	245	410	158	185	323	99	324	247	101	191	175	116	202	155	326	381	146	268	207	223	142	227	191	143
80	chr1	5974213	5977863	92	227	119	84	65	46	88	59	80	94	143	142	62	62	70	164	249	133	83	202	69	172	151	98	176	124	84	131	110	170	296	87	148	114	201	93	123	142	79
81	chr1	6008263	6010185	158	295	178	236	140	99	136	107	144	104	200	179	87	78	77	267	342	160	163	379	138	254	280	138	286	218	113	217	148	270	506	153	265	234	293	134	260	245	145
82	chr1	6010622	6011322	26	13	25	33	10	25	25	35	22	33	36	21	15	27	21	27	49	30	15	34	11	20	20	21	31	20	17	22	9	27	58	11	35	21	39	13	38	36	13
83	chr1	6082002	6084318	54	112	54	50	26	34	27	40	44	47	83	66	17	21	23	87	145	41	68	89	26	52	100	39	101	69	19	46	31	71	92	22	33	24	50	31	95	114	30
84	chr1	6165973	6167793	12	24	38	73	56	51	80	57	32	83	115	105	36	44	46	21	46	56	17	39	28	52	32	54	62	16	23	26	18	39	49	18	27	13	51	23	35	48	34
85	chr1	6181623	6182971	129	281	153	105	106	83	114	81	118	115	154	135	83	64	88	198	310	142	134	224	110	212	199	83	181	161	115	121	111	205	312	88	221	155	201	112	236	216	117
86	chr1	6187909	6189251	121	279	142	127	103	76	118	51	78	73	119	76	54	33	27	230	330	97	168	182	70	168	210	74	126	141	79	114	133	175	362	151	203	210	182	112	162	140	129
87	chr1	6217955	6219046	161	465	153	134	99	47	107	47	69	56	106	75	42	40	50	299	401	135	213	372	138	214	123	66	97	114	102	148	212	319	398	139	276	224	217	143	211	162	152
88	chr1	6272835	6273915	5	11	12	15	23	30	45	40	22	6	6	6	4	2	2	41	73	37	16	6	8	13	40	15	69	24	10	29	2	7	9	5	26	48	44	9	13	32	3
89	chr1	6341401	6342943	57	84	70	68	57	60	97	79	66	67	111	80	35	49	47	97	151	73	41	39	49	102	110	64	172	92	50	87	48	70	141	60	107	97	97	90	111	127	53
90	chr1	6375774	6377222	114	336	167	128	70	60	72	61	83	62	81	77	32	36	42	244	375	119	135	352	100	233	169	87	131	143	104	165	144	289	297	124	256	139	144	106	154	159	130
91	chr1	6472616	6473926	74	137	105	48	32	21	43	16	30	34	65	48	16	19	26	57	89	28	60	78	36	94	68	29	72	61	50	75	44	67	146	28	103	67	71	56	80	60	40
92	chr1	6536688	6537744	118	261	135	73	71	43	70	53	65	66	116	92	61	35	46	186	285	101	115	177	86	237	164	85	185	112	62	100	123	175	262	92	197	184	172	105	217	153	106
93	chr1	6562236	6563150	201	338	158	135	69	66	98	87	134	72	138	109	51	64	61	241	358	151	203	370	78	220	206	85	179	149	99	168	128	202	403	102	157	233	210	108	178	170	122
94	chr1	6583452	6586804	237	649	301	120	82	90	102	110	131	138	221	161	98	95	109	408	558	242	302	575	176	483	353	199	376	277	211	344	254	470	583	260	374	408	290	184	320	332	211
95	chr1	6595559	6596691	42	100	39	24	24	13	9	22	26	22	48	19	12	6	13	78	90	20	50	78	21	85	54	31	43	43	36	47	36	82	88	38	45	53	56	42	36	53	45
96	chr1	6607378	6608513	54	106	48	33	22	25	28	28	37	18	44	43	21	20	17	84	125	39	62	106	33	94	70	23	56	49	36	51	50	68	92	38	60	70	59	33	61	78	45
97	chr1	6683958	6684873	84	165	84	74	50	38	55	46	55	40	75	72	33	42	25	121	180	71	114	140	51	126	114	55	108	82	54	66	81	104	171	65	150	85	103	61	107	97	76
98	chr1	6766515	6768821	219	480	235	141	83	78	119	107	111	107	173	131	75	67	77	439	640	169	326	395	163	373	414	147	331	204	165	239	247	396	456	187	412	326	247	181	366	337	202
99	chr1	7389102	7390483	2	5	7	23	9	14	20	7	11	27	42	39	13	17	27	8	3	10	2	2	3	20	5	9	24	25	7	14	4	6	10	5	5	5	10	2	49	45	20
100	chr1	7766491	7767136	20	31	10	5	3	3	4	3	13	3	8	6	4	1	2	32	39	9	36	44	3	28	33	7	13	21	18	19	25	36	34	12	34	35	18	11	12	16	9
101	chr1	7809736	7810638	13	46	14	1	2	3	2	5	0	60	107	47	33	29	39	0	5	3	0	1	4	75	60	29	81	2	5	1	33	59	92	17	5	0	4	37	14	23	10
102	chr1	7895655	7896162	1	1	0	2	2	1	2	3	2	5	6	5	0	0	1	1	1	1	1	1	1	1	2	0	2	29	35	41	22	25	54	19	60	47	72	7	28	9	14
103	chr1	7936296	7937697	148	337	171	159	103	77	99	91	89	150	210	182	89	96	96	267	419	185	182	255	87	178	186	89	167	179	143	157	158	230	369	119	184	259	269	127	227	199	130
104	chr1	7942954	7945684	360	864	491	414	314	260	371	321	303	367	521	429	279	250	239	691	1022	513	421	817	308	676	588	319	720	438	336	484	376	675	1094	341	715	589	771	346	688	650	392
105	chr1	8008432	8009240	63	135	45	66	39	23	47	35	70	17	43	34	18	17	19	227	322	74	49	83	27	85	71	37	71	97	45	78	109	164	241	61	154	174	104	52	176	155	83
106	chr1	8152167	8152785	8	21	32	30	19	23	29	22	17	33	38	42	17	15	18	12	23	30	1	16	25	13	6	18	36	14	16	25	10	24	31	32	66	36	99	8	17	36	36
107	chr1	8332716	8335057	37	66	55	33	25	23	46	42	28	53	85	83	23	34	28	40	71	20	34	44	34	82	66	37	71	54	35	45	53	61	108	18	45	30	54	59	90	107	38
108	chr1	8341194	8342074	20	24	19	4	8	5	7	11	11	2	10	8	2	1	1	7	8	2	8	10	7	25	29	6	17	19	10	15	18	19	15	4	6	7	13	11	20	32	8
109	chr1	8405345	8407728	97	240	161	68	44	46	43	43	36	112	144	129	60	75	77	67	112	75	81	118	95	169	109	93	255	77	111	131	107	143	226	89	174	163	199	94	140	115	81
110	chr1	8507935	8508831	13	26	31	20	20	15	19	51	24	58	64	55	26	29	49	19	21	15	12	29	19	36	38	37	95	10	23	25	15	20	26	12	36	34	52	18	25	43	30
111	chr1	8685482	8686404	98	189	95	54	42	35	47	38	36	22	45	35	18	13	21	147	207	56	104	115	55	79	108	38	86	82	65	82	114	186	222	51	151	137	87	61	80	66	39
112	chr1	8798980	8800971	199	405	220	138	101	90	120	127	146	144	241	165	108	93	101	329	473	161	216	340	157	279	292	124	299	212	166	237	199	304	483	191	290	314	281	168	248	222	204
113	chr1	8839307	8842544	46	77	110	138	117	119	140	146	107	248	205	259	115	103	81	85	139	143	43	82	57	101	64	171	172	56	53	60	39	73	104	62	60	40	194	40	93	114	77
114	chr1	8842899	8844476	15	25	47	54	36	46	60	58	24	70	78	78	32	40	47	34	59	63	14	30	30	44	31	66	74	15	24	26	14	24	45	23	23	6	86	7	37	54	34
115	chr1	8844897	8855135	88	225	342	463	290	383	494	472	335	576	550	562	247	244	277	256	424	434	128	217	166	329	293	435	665	215	170	181	111	240	379	154	371	85	462	105	284	377	201
116	chr1	8855193	8856968	10	22	47	72	39	69	98	61	36	81	83	78	30	39	41	33	45	72	18	28	27	42	22	72	85	16	29	24	8	29	59	16	52	11	76	13	35	42	34
117	chr1	8859974	8863609	424	835	555	487	346	279	369	338	354	345	493	436	205	171	243	677	1071	510	575	771	358	682	697	350	811	499	357	483	396	652	998	365	802	612	674	322	607	600	391
118	chr1	8991713	8992553	12	16	33	30	26	38	55	16	8	66	64	78	17	53	39	16	38	51	8	21	20	21	7	31	27	8	17	15	12	36	14	11	34	7	36	15	29	17	11
119	chr1	9019903	9023205	35	107	31	20	17	31	40	29	37	25	54	49	20	31	32	77	103	29	37	14	17	74	44	19	65	67	17	42	35	70	63	26	65	19	54	36	186	207	19
120	chr1	9023443	9024488	6	12	12	2	8	20	11	18	6	10	20	17	8	10	12	19	21	6	11	4	8	15	9	2	21	12	3	8	4	10	17	9	12	6	23	11	46	50	4
121	chr1	9048061	9048548	4	10	2	2	8	16	26	4	2	12	12	16	10	6	9	7	7	6	0	0	3	12	7	8	17	5	1	8	4	8	4	3	24	22	18	5	24	26	6
122	chr1	9049720	9050495	12	21	11	13	15	30	40	11	14	27	34	41	17	23	20	23	34	15	10	3	8	19	12	8	29	23	8	18	20	15	21	11	35	36	36	21	48	68	8
123	chr1	9111328	9112535	45	97	25	23	26	19	30	12	33	11	27	14	8	5	9	131	189	52	83	80	20	72	66	18	51	28	34	58	70	95	54	26	76	82	69	29	69	59	39
124	chr1	9145087	9146915	29	51	42	53	65	95	109	87	59	76	78	76	49	55	66	107	172	117	56	60	42	73	89	88	193	67	44	79	25	78	117	48	86	77	110	30	145	169	45
125	chr1	9163957	9165929	108	192	139	98	79	68	75	68	82	92	164	131	63	65	65	129	195	68	183	159	63	91	140	46	115	121	86	118	129	175	339	115	150	215	159	170	170	169	112
126	chr1	9216819	9218147	217	494	230	140	95	80	93	55	96	78	165	96	61	49	55	336	426	116	260	334	139	351	286	129	229	192	179	253	214	331	381	152	409	385	212	163	278	210	177
127	chr1	9275389	9275777	42	138	41	10	7	11	5	15	13	12	24	13	8	5	8	106	138	69	44	77	18	54	30	30	32	20	19	44	19	39	43	15	23	67	23	20	25	20	20
128	chr1	9395718	9396544	14	53	30	27	11	14	26	20	23	28	32	31	20	22	15	64	94	55	34	42	16	41	47	23	46	13	12	30	13	19	33	16	31	34	38	21	19	26	10
129	chr1	9411263	9412267	85	145	115	74	85	81	86	88	66	163	208	154	111	113	116	132	210	149	115	206	79	133	153	114	198	92	79	93	52	101	242	80	78	132	214	86	135	109	84
130	chr1	9521620	9522996	201	264	178	140	80	77	91	71	74	58	124	75	58	51	58	290	401	156	283	451	141	236	223	106	205	151	121	201	146	325	451	154	299	302	206	162	206	170	167
131	chr1	9570970	9572132	72	136	62	57	32	24	30	23	33	20	41	27	17	18	10	110	114	47	61	165	33	86	44	35	38	25	42	65	81	122	122	44	78	81	92	36	53	50	36
132	chr1	9598334	9598585	3	5	4	7	2	2	4	4	2	10	16	17	8	3	7	7	8	2	1	9	2	4	3	5	3	3	2	4	0	7	7	3	7	1	9	4	7	4	4
133	chr1	9608704	9609372	11	24	19	40	28	22	41	19	17	31	41	43	25	24	28	26	46	22	15	19	20	34	15	19	29	18	18	19	20	25	41	21	42	24	42	21	27	40	20
134	chr1	9609521	9610511	27	77	42	52	26	28	46	14	16	34	63	31	24	27	24	44	90	28	29	43	12	71	52	35	44	37	20	31	29	45	64	24	60	33	68	32	63	48	36
135	chr1	9610945	9613940	126	245	184	273	229	195	263	178	170	290	401	337	183	173	195	297	476	238	175	188	111	310	352	177	377	158	91	176	85	148	236	128	189	156	241	94	303	237	174
136	chr1	9633677	9639275	293	578	386	478	381	294	496	234	234	430	627	512	243	261	287	462	705	367	308	502	262	530	412	306	496	256	266	351	266	455	640	309	449	404	654	240	460	397	334
137	chr1	9669318	9670755	41	83	67	66	47	23	32	51	39	59	99	93	44	34	53	87	123	61	54	108	39	72	51	37	72	74	56	87	45	57	131	68	79	57	114	44	73	77	60
138	chr1	9671280	9672388	34	80	38	29	24	23	22	26	26	38	58	50	23	20	23	49	90	46	46	62	25	67	38	19	35	33	39	48	36	37	91	27	51	59	54	26	35	34	20
139	chr1	9699834	9701952	44	96	65	39	38	35	39	76	51	60	103	67	32	39	43	101	160	27	72	69	40	57	90	41	103	80	36	77	35	70	105	42	55	49	84	55	84	107	30
140	chr1	9703765	9704720	17	40	17	13	13	9	7	12	14	11	20	22	4	2	11	37	45	12	18	30	6	32	48	12	31	10	7	14	16	30	25	12	19	10	29	7	25	39	12
141	chr1	9710765	9712507	31	29	44	33	26	33	36	41	26	65	88	91	29	25	44	36	76	35	42	44	13	59	71	45	90	22	25	26	17	30	39	25	33	16	35	15	78	76	24
142	chr1	9712654	9716775	86	156	103	105	65	77	102	104	80	177	228	274	72	103	86	158	259	102	86	131	44	180	167	96	181	65	65	88	68	133	163	60	86	51	182	96	222	260	78
143	chr1	9770311	9770798	2	2	15	9	5	8	12	10	7	31	35	28	13	11	11	5	9	10	3	6	12	4	4	13	23	3	7	4	5	11	15	13	10	8	9	3	12	8	4
144	chr1	9805710	9807091	93	195	80	49	23	24	20	32	28	17	28	32	12	11	14	146	171	44	83	148	55	117	77	33	63	52	55	97	105	112	147	75	102	118	96	60	90	73	61
145	chr1	9892509	9894074	129	214	137	75	65	68	89	66	73	100	162	117	78	63	76	178	215	148	89	234	98	159	147	77	151	89	94	136	130	188	310	105	174	183	175	70	93	109	81
146	chr1	9925023	9926481	197	403	252	185	114	136	170	121	126	233	320	255	126	135	152	307	472	202	189	299	129	285	253	124	279	198	176	198	154	248	413	174	342	264	307	156	277	216	146
147	chr1	10015059	10016343	49	126	77	58	39	37	48	38	38	64	82	71	35	38	43	92	179	88	60	100	58	92	102	53	96	90	52	66	61	98	153	66	89	109	112	51	91	83	60
148	chr1	10152730	10153410	3	9	12	15	13	26	42	4	7	17	17	12	6	5	5	6	6	24	1	8	13	10	4	16	22	3	11	5	0	3	19	5	5	1	27	1	3	4	8
149	chr1	10192517	10193548	101	140	78	60	51	28	54	16	49	18	45	26	18	18	20	143	179	64	75	194	55	124	94	53	85	80	68	87	64	121	231	46	82	121	86	67	64	64	68
150	chr1	10381102	10382549	91	253	111	98	71	51	70	56	70	58	135	81	46	41	51	182	220	83	122	245	62	179	154	82	138	98	96	140	63	158	295	90	136	137	143	94	145	149	114
151	chr1	10412744	10413888	74	216	110	94	57	30	74	31	44	62	85	77	39	36	38	127	190	66	85	176	60	153	113	42	78	130	58	103	107	179	241	70	152	85	154	90	126	122	71
152	chr1	10454460	10456297	68	167	103	81	66	57	117	108	68	151	207	117	89	89	109	157	232	179	127	179	75	137	127	108	186	98	64	92	46	98	190	64	128	136	218	49	93	105	91
153	chr1	10457295	10458370	90	170	86	75	42	39	66	63	60	63	105	75	41	42	36	111	188	69	88	131	52	117	72	67	91	81	55	91	66	103	166	63	109	117	139	59	85	103	70
154	chr1	10994490	10996250	135	260	170	119	108	93	123	77	102	112	194	139	68	60	77	214	294	142	157	221	131	237	191	116	231	168	98	185	141	233	335	110	280	184	237	123	238	213	132
155	chr1	11013437	11013821	6	4	11	12	7	9	15	8	4	26	26	18	16	10	14	10	6	10	1	8	7	12	10	8	13	7	5	10	2	8	7	4	10	3	9	4	12	21	7
156	chr1	11035358	11036854	30	117	89	63	45	44	55	38	31	81	124	102	51	48	59	65	79	61	38	79	31	137	61	67	55	42	41	46	35	62	97	22	53	20	90	30	90	78	59
157	chr1	11041963	11043783	157	393	174	131	104	81	94	58	62	111	151	112	68	66	67	274	323	169	191	295	105	272	199	91	191	116	130	159	189	307	357	126	249	173	192	101	209	123	134
158	chr1	11081881	11082932	107	296	135	121	77	63	84	56	66	105	158	113	49	50	74	245	365	121	121	292	88	222	180	100	144	142	85	149	137	193	294	104	178	145	165	90	205	127	108
159	chr1	11244889	11245731	97	204	136	68	90	50	86	55	57	104	138	116	65	61	68	169	299	139	101	215	97	195	179	84	148	125	95	117	108	146	251	80	148	180	196	73	164	145	102
160	chr1	11255705	11256719	119	281	157	100	63	61	65	44	66	60	103	87	46	38	43	173	314	107	159	187	91	201	171	81	143	138	66	113	134	232	268	85	230	190	153	123	200	150	105
161	chr1	11263677	11264024	3	10	11	6	5	4	7	8	5	19	29	16	13	17	23	10	12	14	2	5	8	6	4	13	23	4	3	4	2	0	5	6	6	3	12	0	4	4	5
162	chr1	11461633	11462013	12	49	32	34	21	11	9	6	5	7	10	12	4	4	3	14	26	20	7	54	22	32	12	19	10	11	12	23	20	36	45	27	11	15	26	7	15	17	13
163	chr1	11637174	11637743	18	25	9	8	3	7	4	7	9	3	3	7	1	5	2	20	33	10	17	25	16	13	17	8	10	14	13	38	17	31	39	15	13	13	16	6	8	11	13
164	chr1	11646584	11647681	83	188	111	39	19	27	24	14	36	41	75	67	26	20	30	150	206	71	91	179	72	124	96	52	107	70	61	113	88	143	158	76	130	128	116	56	96	102	57
165	chr1	11663297	11664494	77	179	91	49	43	41	41	34	51	32	59	52	35	20	28	147	192	51	113	177	44	108	139	32	70	112	75	88	87	123	170	47	130	120	113	60	83	104	57
166	chr1	11701886	11702696	23	52	30	6	1	7	11	18	15	28	45	34	24	13	15	27	37	31	38	40	25	57	28	32	53	30	23	37	32	50	64	23	50	26	64	27	47	29	28
167	chr1	11718619	11719739	55	110	82	53	36	47	39	20	35	80	108	73	42	42	47	83	117	57	49	117	48	45	54	34	43	76	67	75	73	83	218	108	69	75	131	66	69	55	40
168	chr1	11785611	11786508	23	41	28	35	27	17	29	37	30	36	55	32	24	20	22	39	78	40	28	60	14	53	39	24	40	41	23	39	15	23	68	24	30	32	71	6	19	23	15
169	chr1	11787934	11789525	133	337	176	118	103	71	98	102	117	130	220	152	77	61	72	298	443	153	222	311	92	255	251	104	189	152	133	222	138	212	409	129	157	243	215	117	154	156	109
170	chr1	11890364	11892955	1119	2063	5424	5678	4321	5634	7963	4199	2395	7187	7348	6742	2957	3711	3960	2086	3653	7267	1035	1662	3636	2476	1490	5884	7868	1751	2395	2644	1277	2894	3158	3164	5951	3529	6102	1600	2914	3123	3050
171	chr1	11908717	11909604	84	136	87	72	55	53	73	51	41	82	141	77	55	55	54	118	168	112	66	148	49	126	80	82	99	55	68	76	74	129	240	83	122	150	170	51	78	63	79
172	chr1	11916789	11917639	125	287	171	118	75	62	109	87	71	127	177	156	92	72	71	254	388	214	142	319	112	180	190	93	120	117	97	139	125	194	383	127	132	217	210	94	158	126	119
173	chr1	11962610	11963367	65	134	74	70	39	26	37	16	43	32	56	40	16	26	18	97	147	63	72	128	43	105	95	51	73	69	46	90	72	143	194	62	99	112	81	37	84	86	62
174	chr1	12001643	12002819	266	602	251	187	126	95	147	98	144	107	182	134	71	57	72	515	730	214	295	496	135	372	356	130	314	226	166	243	227	338	526	181	352	376	270	147	261	275	159
175	chr1	12034508	12035689	28	89	48	62	54	46	53	53	41	36	72	56	32	36	46	107	178	95	63	71	28	112	114	71	156	43	26	44	31	50	67	26	43	43	71	41	62	81	21
176	chr1	12036097	12037702	22	51	17	32	34	33	40	39	32	23	35	24	15	20	32	105	157	69	46	58	15	56	77	33	115	31	13	15	10	30	35	14	29	28	37	24	73	61	23
177	chr1	12045606	12047716	78	168	127	192	136	119	131	80	91	80	126	89	58	47	75	187	260	136	153	179	75	202	184	123	187	104	95	86	64	139	163	67	133	102	188	53	174	164	64
178	chr1	12048095	12049302	11	17	43	78	58	85	130	49	23	45	56	43	34	24	26	44	54	96	16	25	21	30	28	72	92	8	22	17	5	10	30	16	12	25	77	13	24	22	18
179	chr1	12049481	12051580	51	74	91	256	183	206	263	129	87	96	85	90	66	67	82	138	235	174	82	97	49	108	134	101	227	43	50	74	35	87	107	51	73	73	143	35	104	116	34
180	chr1	12052063	12052916	13	29	19	45	45	62	53	27	20	27	25	31	16	18	15	29	49	30	26	27	6	33	34	27	36	12	2	13	2	17	23	9	21	9	35	9	32	34	10
181	chr1	12053140	12054192	7	11	14	43	24	30	57	19	14	22	17	24	14	15	22	18	28	24	13	11	5	24	13	16	27	4	6	6	5	7	15	8	23	8	25	6	16	19	8
182	chr1	12054711	12055978	10	14	21	37	36	34	50	30	18	23	27	33	13	24	15	31	52	26	24	22	9	34	35	29	44	11	9	9	10	14	21	14	35	11	43	12	24	34	12
183	chr1	12063546	12064812	10	38	37	50	29	36	44	28	30	29	48	24	20	28	18	40	53	31	15	31	19	32	39	29	59	17	20	30	13	31	46	19	29	14	38	10	41	31	20
184	chr1	12066224	12067669	11	14	27	43	41	34	36	48	27	33	32	49	19	25	30	24	55	42	14	17	11	19	32	30	56	12	16	15	5	21	27	16	15	7	42	11	42	41	9
185	chr1	12068244	12068874	4	11	11	15	12	10	16	11	18	15	17	12	14	2	13	21	28	16	10	18	7	15	23	16	25	8	9	8	4	7	15	12	13	6	10	10	22	22	5
186	chr1	12110649	12111243	10	14	7	18	9	5	14	5	14	18	12	18	6	7	8	21	25	20	11	18	2	17	24	13	32	10	7	11	6	11	17	7	3	4	18	13	22	16	2
187	chr1	12123994	12124610	8	19	6	9	6	6	10	4	7	9	14	17	5	9	7	14	22	13	7	10	4	25	29	11	16	5	4	8	10	18	20	3	8	1	16	1	11	12	5
188	chr1	12124835	12130525	118	238	145	155	86	104	128	215	156	180	226	237	101	111	114	298	514	184	171	250	56	345	321	168	302	144	87	115	81	166	183	87	112	56	221	86	307	335	71
189	chr1	12131511	12136470	118	165	172	151	118	181	230	162	115	408	466	456	196	229	217	154	309	376	95	153	139	253	188	295	417	102	114	176	100	163	209	118	137	136	309	76	238	269	173
190	chr1	12144014	12145482	57	76	78	92	43	54	56	47	44	77	142	89	60	52	53	80	117	108	45	88	60	86	60	80	123	57	38	83	42	59	135	41	56	64	101	39	104	87	69
191	chr1	12149309	12151342	137	340	137	119	98	61	92	60	100	55	106	82	37	41	33	280	370	127	187	316	109	226	190	85	206	129	103	167	179	214	266	118	221	202	186	85	204	196	128
192	chr1	12191314	12192699	20	35	28	28	12	21	20	32	30	42	59	63	25	21	26	47	97	22	33	50	12	68	61	37	82	22	13	13	21	41	37	23	24	13	32	20	62	72	25
193	chr1	12212485	12213160	56	113	46	23	11	11	15	5	7	8	32	13	4	8	8	90	112	23	58	120	26	77	61	20	23	35	47	46	69	103	117	38	53	75	57	30	53	32	40
194	chr1	13898363	13903243	180	410	316	234	210	310	431	373	222	478	550	527	304	314	349	469	637	392	306	295	230	296	340	292	567	172	207	265	225	385	424	229	385	416	475	177	268	302	201
195	chr1	13927201	13927657	9	10	10	2	5	6	10	20	4	22	30	28	12	14	15	8	19	19	9	2	6	18	9	32	44	2	5	12	2	10	15	9	8	27	19	5	7	8	4
196	chr1	13929363	13930814	79	88	119	66	45	102	127	137	99	210	248	223	111	141	156	120	180	189	85	119	80	107	120	174	265	83	77	92	45	93	188	89	89	145	217	43	93	140	82
197	chr1	13947469	13949330	174	430	245	106	77	82	82	79	125	84	157	140	73	64	63	368	517	158	209	350	135	353	307	174	287	192	161	211	194	345	393	161	375	308	246	146	274	230	179
198	chr1	13991636	13993951	34	27	51	31	22	32	43	53	27	87	113	133	43	40	63	42	90	67	12	34	39	60	57	67	123	21	27	38	15	36	68	27	24	21	61	25	60	92	26
199	chr1	13994166	13995470	9	17	25	14	16	21	19	18	11	63	66	74	23	30	27	20	41	19	17	13	10	20	33	45	43	17	15	14	8	32	39	14	16	10	30	13	25	34	15
200	chr1	14715460	14717201	4	4	17	43	55	67	74	49	33	31	36	36	25	30	40	36	46	39	17	10	5	6	17	20	62	6	6	8	5	11	19	11	23	14	38	11	18	31	18
201	chr1	15608493	15609698	117	318	97	84	61	28	47	39	52	29	69	37	20	11	20	208	285	60	141	295	75	197	143	43	91	104	76	124	147	218	261	99	139	162	110	90	123	110	87
202	chr1	15725449	15726491	71	150	88	63	50	31	48	43	61	74	97	76	56	39	47	109	160	75	66	132	57	126	97	52	121	97	62	89	53	114	208	61	79	71	130	65	73	101	61
203	chr1	15783485	15784415	37	100	52	24	20	13	26	16	26	15	37	27	11	12	11	104	155	36	128	79	42	138	107	32	89	62	40	37	72	116	107	30	139	82	60	34	82	69	44
204	chr1	15802311	15803142	38	75	48	39	29	30	42	17	17	61	85	73	37	47	49	29	38	17	49	117	34	45	65	47	67	84	52	81	48	79	176	72	44	83	102	54	72	60	35
205	chr1	15815647	15818185	151	333	208	213	165	126	157	108	120	208	273	218	124	118	117	285	423	237	209	347	151	264	250	149	284	161	169	250	194	260	421	156	273	296	316	123	244	202	190
206	chr1	15882875	15884366	121	317	114	73	35	24	40	44	77	44	78	43	17	18	22	269	310	86	160	217	67	211	181	53	139	70	91	124	154	231	240	81	151	203	109	94	121	129	82
207	chr1	15895991	15896801	22	22	64	50	39	44	47	34	26	86	103	86	49	58	60	20	41	79	9	16	59	32	30	41	93	63	37	63	37	41	70	32	106	62	85	28	63	71	39
208	chr1	16033106	16035615	335	803	544	456	311	280	443	275	283	376	550	442	233	230	268	619	931	466	421	624	328	568	546	305	632	465	337	466	378	608	949	363	649	496	690	319	600	507	348
209	chr1	16035981	16036755	24	48	34	42	38	23	35	27	20	15	28	26	6	13	12	51	54	25	36	24	19	67	105	39	114	16	11	21	32	40	38	23	59	58	72	14	48	50	29
210	chr1	16043478	16044379	6	10	15	16	16	27	34	28	15	109	100	88	35	47	36	20	34	22	29	17	17	21	29	26	76	13	4	20	11	17	19	21	18	6	20	7	22	15	6
211	chr1	16046207	16047735	158	370	180	126	92	54	89	72	86	61	125	93	33	40	43	203	332	108	189	383	117	193	177	97	178	166	125	172	140	274	403	143	264	212	200	112	186	152	131
212	chr1	16048186	16049357	47	73	67	75	90	71	87	63	60	103	141	103	64	44	58	87	142	88	31	53	55	74	94	64	137	60	38	74	48	69	127	54	121	74	105	63	94	101	47
213	chr1	16136868	16137173	11	14	8	5	8	8	10	9	5	10	11	17	4	2	8	17	18	4	7	6	3	17	14	8	12	5	5	13	2	13	10	3	7	5	8	7	17	23	6
214	chr1	16140353	16140905	9	14	11	11	11	13	7	10	10	19	18	23	13	7	13	21	25	11	18	18	10	33	24	13	35	13	8	5	4	16	21	6	15	5	18	7	27	31	11
215	chr1	16141133	16141783	8	25	16	12	10	10	11	17	16	13	23	26	6	7	6	16	36	12	14	18	5	38	13	18	36	14	9	15	14	18	29	5	10	5	21	20	34	33	9
216	chr1	16142405	16142882	10	23	7	14	8	3	6	3	7	6	8	11	1	5	3	12	15	5	9	11	5	29	19	6	15	10	6	12	6	14	25	5	6	2	10	4	15	22	6
217	chr1	16147746	16149418	23	49	35	58	61	32	65	59	32	74	103	95	28	35	49	66	82	51	70	83	23	65	98	40	176	16	21	31	13	38	64	17	40	44	64	22	113	100	55
218	chr1	16164340	16164776	4	9	22	29	23	34	44	26	6	41	30	34	25	17	35	3	10	37	8	7	12	9	8	16	63	6	9	9	3	7	13	13	10	13	30	6	9	15	10
219	chr1	16173905	16175518	64	171	100	169	139	96	156	92	87	153	191	142	76	82	91	159	219	180	154	198	83	147	150	110	202	73	78	111	85	148	191	72	123	120	179	59	120	110	91
220	chr1	16211684	16212524	17	55	20	31	18	23	25	17	22	17	22	14	12	5	9	7	15	5	34	25	14	23	10	7	24	16	16	26	10	18	29	11	23	27	19	26	17	26	9
221	chr1	16405368	16406472	101	233	102	69	58	46	73	55	63	35	78	49	23	21	29	151	197	89	81	207	75	178	138	75	121	117	51	113	114	180	261	105	124	130	134	55	107	109	76
222	chr1	16435599	16436724	78	200	127	76	57	44	80	74	42	107	135	104	51	58	57	146	206	145	111	184	60	165	120	73	105	77	77	85	78	152	229	92	91	124	142	68	92	95	72
223	chr1	16551136	16552566	183	413	203	149	97	72	126	112	127	125	212	162	89	88	102	332	466	192	250	413	154	285	272	89	220	166	136	186	215	302	466	174	280	265	283	131	243	241	125
224	chr1	16565932	16567245	115	210	175	106	82	78	129	92	93	118	154	144	78	68	108	225	255	170	130	181	118	197	207	114	239	159	95	147	82	140	259	105	213	171	208	87	200	201	111
225	chr1	16639432	16640585	166	293	147	117	91	90	109	107	94	124	145	152	53	66	87	254	326	130	125	229	82	206	261	99	243	153	86	155	89	174	333	78	207	226	223	108	191	200	93
226	chr1	16650950	16651314	4	9	7	16	20	19	16	10	12	4	8	8	4	4	10	28	21	13	4	8	4	10	17	6	18	4	7	6	1	2	9	1	11	9	23	7	12	19	2
227	chr1	16698015	16698547	22	53	12	22	11	2	8	11	14	7	27	15	3	5	5	65	73	16	20	39	13	33	38	8	34	21	15	36	16	24	45	11	25	41	34	19	17	19	17
228	chr1	16712078	16713988	832	7053	2797	4092	2791	3557	5011	3578	2180	11832	13791	11955	4923	6336	7202	3995	8478	4777	1207	2075	3439	7947	6954	4287	20956	1193	1577	1940	2568	2003	1939	1914	4121	2859	16073	1814	7871	12319	2786
229	chr1	16812318	16813026	17	137	14	36	31	9	15	20	17	27	54	55	25	19	11	65	130	22	58	99	28	129	91	29	60	33	28	53	31	42	77	27	19	31	87	24	56	72	33
230	chr1	16843206	16844544	210	216	218	160	102	112	166	134	183	86	106	93	51	42	46	390	462	256	410	521	189	246	227	129	227	230	137	217	125	310	473	144	312	411	197	251	250	215	218
231	chr1	17094491	17096413	501	564	1789	1310	940	1193	1729	1035	634	1024	1187	1052	367	481	529	532	935	1685	496	1007	1584	993	693	2311	2237	723	983	1263	568	1385	1546	1180	3078	2042	2622	775	1103	1185	1117
232	chr1	17102890	17105125	428	1349	2177	1808	1385	1700	2455	1479	944	2253	2574	2195	955	1171	1237	911	1690	2423	495	1092	2027	1852	1296	3568	4667	837	1331	1515	591	948	1390	1389	3117	2148	4998	557	1142	1487	1406
233	chr1	17112889	17113639	34	60	18	2	4	1	2	6	21	3	11	9	3	0	3	28	21	2	44	61	32	44	56	28	38	20	21	32	16	46	52	17	50	96	50	23	12	22	18
234	chr1	17210450	17211285	32	64	18	18	10	7	9	11	12	5	15	12	6	7	6	60	69	13	39	75	19	39	26	14	20	15	22	34	26	51	78	22	27	42	27	20	28	22	20
235	chr1	17252829	17253490	79	189	79	78	60	46	56	52	61	73	114	74	31	35	46	137	250	74	75	182	60	154	147	80	113	107	72	103	93	144	231	86	130	136	122	83	136	104	58
236	chr1	17636437	17639204	191	395	174	159	118	80	140	94	88	136	226	146	79	67	64	321	474	191	265	327	139	267	225	135	254	182	130	196	182	289	407	150	289	205	238	161	225	221	122
237	chr1	19101210	19102564	95	265	122	99	79	67	86	57	55	78	163	111	55	49	58	151	206	121	95	253	76	217	129	105	123	109	91	99	157	217	376	109	144	111	191	92	169	156	123
238	chr1	19125496	19127337	81	180	145	127	88	93	131	74	56	159	230	181	89	97	102	124	153	128	50	143	92	131	94	105	193	124	81	114	63	120	215	86	117	57	181	72	171	133	89
239	chr1	19148906	19151618	78	124	105	79	72	87	96	122	100	132	181	184	106	107	130	101	173	82	95	106	84	80	139	71	277	84	66	94	62	87	166	73	147	118	132	55	116	145	48
240	chr1	19155442	19156238	65	137	56	31	31	22	24	22	40	14	47	28	9	13	12	114	148	27	74	142	32	86	68	31	70	50	36	56	65	67	141	66	58	87	70	36	81	97	67
241	chr1	19408343	19410470	238	510	274	189	164	132	192	190	199	213	308	271	128	123	144	435	651	257	270	429	185	424	330	166	376	259	184	274	206	351	573	207	334	322	437	202	397	338	234
242	chr1	19450139	19451578	170	405	201	129	77	81	122	85	99	105	189	158	81	73	90	308	411	127	188	249	133	368	273	100	323	237	135	180	200	337	394	106	463	251	271	168	317	278	152
243	chr1	19459231	19460432	25	28	34	28	29	25	45	47	29	42	55	44	20	17	22	26	55	25	16	25	18	51	37	29	70	28	16	23	27	36	42	19	46	3	32	21	45	79	24
244	chr1	19460729	19461584	12	19	26	43	20	23	40	15	9	24	41	43	13	13	15	10	16	18	14	18	10	16	10	14	22	12	10	16	10	17	28	7	24	4	21	9	28	21	16
245	chr1	19510796	19512126	158	353	132	118	77	51	58	43	58	29	86	63	40	28	26	233	329	107	201	355	82	223	174	57	149	105	106	158	164	267	349	109	125	163	153	84	158	125	98
246	chr1	19529152	19529743	7	11	3	5	6	11	7	12	9	5	10	14	5	5	8	17	10	5	8	9	4	8	24	7	31	11	3	6	6	8	9	3	10	9	10	6	23	22	1
247	chr1	19675751	19676839	25	26	37	36	33	46	55	57	36	50	59	69	26	18	30	45	55	71	14	9	31	27	35	81	117	24	18	32	23	26	37	22	59	22	59	14	27	32	20
248	chr1	19683913	19685524	233	504	264	165	108	76	131	90	109	84	138	118	49	48	57	377	460	201	240	385	138	413	274	111	220	198	186	271	239	380	466	172	376	331	258	167	279	206	191
249	chr1	19795317	19797093	149	264	234	164	143	118	175	135	127	188	250	206	131	110	143	277	362	174	129	217	127	229	287	156	356	144	142	159	123	237	411	158	333	242	298	110	253	264	127
250	chr1	19998185	19999711	90	199	114	101	72	57	62	44	64	53	51	57	37	30	37	168	234	79	145	156	86	174	159	78	134	94	80	110	102	158	208	65	208	181	132	74	120	101	110
251	chr1	20081168	20082150	84	181	93	72	50	37	62	39	44	50	77	64	34	27	24	121	176	88	91	225	45	145	125	66	91	87	65	98	96	161	273	82	104	117	118	53	138	99	100
252	chr1	20706508	20707581	83	148	91	52	36	40	54	38	42	74	90	65	48	43	54	125	143	79	105	152	58	144	114	71	125	80	73	73	76	120	179	50	118	129	137	76	122	114	64
253	chr1	20847368	20848700	9	30	17	20	20	32	11	15	13	20	32	32	16	12	24	21	43	18	16	21	10	37	17	21	39	12	5	13	14	18	29	3	16	4	30	9	34	46	16
254	chr1	20859718	20861884	167	439	238	151	113	94	151	109	117	176	227	190	119	92	118	321	419	182	228	332	132	306	289	133	213	228	157	195	168	276	484	146	240	286	375	202	322	255	184
255	chr1	20984901	20987628	257	576	298	223	130	100	123	119	165	161	260	200	114	88	105	452	576	227	355	487	171	398	387	149	314	282	219	282	284	467	589	215	431	350	376	184	310	297	210
256	chr1	21374320	21376461	105	213	143	112	72	63	98	56	73	155	189	153	69	74	88	217	280	165	130	209	105	220	176	114	176	127	76	120	86	135	295	110	152	158	192	69	131	143	116
257	chr1	21488749	21490224	20	46	35	78	48	62	71	20	34	18	32	43	19	17	16	42	48	40	65	70	18	78	70	57	95	17	11	27	16	41	24	11	22	30	25	19	62	63	33
258	chr1	21491280	21494367	59	105	160	242	164	260	324	121	85	152	185	187	83	116	104	130	159	233	97	111	98	203	161	221	388	65	52	75	39	123	107	45	94	84	119	58	195	193	89
259	chr1	21533047	21534080	21	24	23	51	32	46	47	57	30	51	57	65	32	20	29	41	53	63	34	34	32	48	61	42	63	26	16	30	14	26	40	18	21	37	30	23	51	50	22
260	chr1	21544046	21545108	58	185	41	101	59	29	40	29	41	20	46	29	7	7	9	181	222	58	158	240	18	249	154	39	82	37	24	29	47	87	58	24	27	74	21	31	62	46	35
261	chr1	21638906	21639471	17	61	22	35	19	9	22	13	26	12	26	18	10	7	7	16	20	4	4	4	0	53	37	17	33	15	10	10	9	25	61	14	18	41	47	15	17	13	20
262	chr1	21978665	21979905	6	24	36	36	65	69	135	116	59	69	50	57	25	26	36	26	50	72	25	23	26	24	28	74	112	12	18	15	6	15	30	22	24	20	58	4	19	26	17
263	chr1	21980329	21983081	423	707	434	372	259	311	438	405	331	379	485	433	227	232	274	547	897	422	479	558	318	563	623	322	849	403	279	438	328	513	855	288	692	606	632	305	639	720	322
264	chr1	22013294	22015500	14	46	15	2	4	2	2	12	11	9	19	20	8	9	8	42	67	19	12	19	4	135	104	45	202	12	5	11	27	34	19	7	22	25	22	15	49	50	14
265	chr1	22051367	22051863	22	29	10	14	10	12	20	14	13	18	29	24	14	9	20	26	30	27	22	16	5	29	22	17	34	18	12	18	6	24	20	8	7	24	20	11	37	47	31
266	chr1	22218007	22218471	4	5	15	45	21	27	40	39	20	23	20	22	10	12	11	11	16	20	0	0	3	15	23	24	57	0	0	0	10	11	32	12	34	33	44	6	4	10	6
267	chr1	22223383	22227070	271	474	404	337	270	334	411	373	284	449	611	522	272	264	297	485	762	418	279	427	270	516	555	360	725	329	228	318	240	404	677	263	585	453	688	236	496	452	280
268	chr1	22238669	22239778	28	44	82	71	50	71	76	103	56	109	149	106	77	83	87	57	92	124	45	77	65	44	56	113	137	30	43	44	23	31	83	45	50	80	148	16	41	36	50
269	chr1	22251401	22253248	224	422	226	133	107	96	153	124	158	91	183	183	97	74	74	305	472	182	224	334	156	282	267	136	345	185	172	241	164	297	417	142	303	291	255	120	259	268	145
270	chr1	22376384	22377016	5	0	3	9	11	14	11	6	3	3	10	8	5	14	18	13	24	8	7	4	2	4	7	6	24	5	1	3	0	1	6	2	6	14	7	9	27	32	4
271	chr1	22650654	22652024	54	108	74	42	35	34	40	58	28	50	85	70	47	33	40	80	120	71	46	76	42	90	75	44	78	51	36	51	43	77	126	43	88	72	84	44	59	58	41
272	chr1	23217973	23219115	114	265	128	105	89	84	111	114	67	156	171	147	87	79	89	230	298	179	163	331	113	201	207	139	210	147	112	128	102	177	334	94	184	190	248	100	175	132	117
273	chr1	23367674	23368227	82	164	86	53	32	20	28	36	43	25	59	33	21	12	20	153	226	48	82	221	43	88	93	34	67	78	70	127	102	150	202	96	93	110	96	47	72	80	71
274	chr1	23368734	23369498	3	16	17	15	11	8	20	16	13	64	56	62	42	33	41	14	31	31	11	21	42	8	9	19	27	28	30	56	12	21	27	37	38	37	69	8	19	24	28
275	chr1	23376473	23377214	38	92	35	40	26	22	27	16	24	26	36	36	24	14	16	94	130	31	25	52	28	72	69	32	45	57	44	33	73	81	91	29	92	66	59	58	78	61	56
276	chr1	23542420	23544388	231	449	277	170	113	79	123	130	134	174	250	180	120	93	89	411	587	225	268	359	156	340	308	139	271	223	168	230	232	357	470	163	385	293	358	176	276	241	184
277	chr1	23566941	23568504	158	409	176	120	98	49	90	95	90	96	188	122	78	78	75	274	386	144	160	409	112	263	223	128	190	188	134	180	160	244	471	165	187	271	244	130	198	168	133
278	chr1	23723722	23725220	19	42	53	81	43	51	63	22	20	29	45	35	22	18	33	27	30	59	14	24	30	31	17	17	45	35	30	38	11	35	61	17	25	32	49	17	21	48	14
279	chr1	23727162	23730828	103	286	229	301	194	129	213	75	77	127	165	129	65	63	84	171	213	145	107	253	134	199	60	123	108	180	146	160	109	199	262	77	271	141	217	93	178	148	129
280	chr1	23752991	23759750	419	1210	704	689	517	420	562	913	782	1162	1681	1178	555	607	585	1469	2239	1319	776	1106	541	1529	1250	1172	1526	482	344	502	384	571	919	382	709	763	858	333	803	646	642
281	chr1	23789288	23789983	13	16	26	29	16	18	21	28	11	45	72	54	23	21	25	32	50	47	35	19	21	30	36	43	98	6	11	20	4	15	11	9	18	14	19	9	17	18	13
282	chr1	23818373	23819419	26	75	35	9	15	10	12	55	40	50	85	36	32	29	33	116	177	98	59	58	30	74	54	58	111	8	23	19	24	24	20	16	34	35	43	16	34	25	23
283	chr1	23890550	23893107	158	286	268	237	170	188	255	214	137	284	369	314	177	214	221	233	468	264	178	233	179	304	320	235	487	215	153	195	144	223	392	135	349	245	363	174	365	359	151
284	chr1	23893464	23894530	9	8	30	30	32	27	45	25	11	45	67	53	23	27	20	10	13	45	7	14	15	18	17	44	37	7	12	19	2	7	21	19	7	6	38	5	15	16	22
285	chr1	23894833	23896238	4	14	29	44	38	33	68	32	21	68	61	69	33	36	37	17	24	47	10	29	31	25	23	44	74	8	19	17	7	20	28	27	28	11	58	10	26	36	18
286	chr1	23896624	23897146	3	9	12	15	15	13	21	13	6	29	21	31	14	9	13	11	9	17	6	7	6	6	7	19	18	8	6	11	12	3	7	2	20	1	18	5	17	14	6
287	chr1	23897406	23899338	9	16	58	77	60	54	94	57	24	98	107	104	54	61	83	18	40	67	12	20	29	33	17	69	90	15	29	29	8	21	41	14	35	12	96	9	36	30	30
288	chr1	23899630	23900099	2	3	13	12	11	12	29	5	5	15	20	26	19	13	10	2	6	9	3	7	6	2	6	13	7	2	5	2	2	6	14	5	5	2	10	4	5	15	4
289	chr1	23901116	23901675	2	4	15	23	14	19	22	13	5	26	31	36	15	22	22	3	6	20	2	12	4	10	5	24	13	4	9	6	5	6	17	10	9	0	23	5	5	7	12
290	chr1	23918989	23920070	21	26	72	95	81	65	119	108	64	85	115	124	72	81	92	61	103	104	29	30	47	51	61	77	225	28	29	40	17	38	76	35	63	52	101	35	60	74	30
291	chr1	23921713	23922215	15	12	14	30	34	41	56	40	19	32	27	21	13	20	17	32	49	98	8	15	11	11	9	26	33	3	14	12	5	10	28	14	26	24	47	6	31	14	20
292	chr1	23941644	23943258	257	427	213	132	80	51	85	90	117	99	165	103	56	56	66	363	526	137	302	371	124	352	274	96	223	176	120	207	198	361	435	143	366	344	207	155	232	242	153
293	chr1	23958211	23958784	2	2	12	10	3	5	12	11	6	27	28	16	7	12	9	0	12	16	5	4	6	6	3	13	16	0	6	9	3	5	7	4	0	2	8	5	4	7	2
294	chr1	23976905	23977842	190	428	231	172	124	116	114	135	147	133	215	148	69	87	94	253	421	223	167	464	149	282	183	134	236	178	169	271	209	339	494	195	270	240	292	84	194	130	140
295	chr1	23989370	23990718	80	199	83	83	50	48	73	54	58	77	119	114	35	60	55	131	190	83	96	154	80	191	152	47	158	84	65	102	69	144	207	76	182	147	130	72	155	138	80
296	chr1	23998419	24000611	156	462	247	160	155	108	121	108	134	126	165	137	72	77	100	322	442	208	188	400	136	312	224	130	186	194	170	248	168	303	478	147	218	246	276	133	187	212	187
297	chr1	24023930	24025270	169	303	165	97	71	62	104	165	164	116	172	155	88	85	93	265	378	187	193	236	119	239	288	117	326	174	112	190	137	218	327	95	189	225	166	134	225	235	113
298	chr1	24064234	24065071	2	4	2	44	29	33	38	19	6	15	16	21	7	11	11	13	31	23	6	7	4	3	2	9	11	4	4	4	5	6	16	7	5	4	12	4	3	4	2
299	chr1	24066880	24068312	64	150	60	48	28	23	28	35	41	73	106	84	44	36	39	151	209	71	102	136	27	111	83	51	82	48	46	63	76	114	215	60	62	85	111	36	77	67	53
300	chr1	24086981	24088550	11	18	35	32	14	19	41	43	27	98	128	125	45	79	70	32	40	97	14	15	18	38	11	67	55	10	21	30	6	8	15	20	30	27	29	9	24	17	16
301	chr1	24107560	24112803	241	291	375	286	250	318	388	494	281	681	842	744	419	431	473	515	715	589	272	429	213	404	408	470	944	184	192	288	119	190	339	156	213	185	343	104	409	355	285
302	chr1	24157238	24160046	368	832	554	431	306	303	420	48	18	506	684	561	275	300	324	489	995	600	391	554	319	679	646	419	717	397	318	407	295	469	866	353	655	483	747	253	624	615	353
303	chr1	24162089	24165248	19	76	209	151	157	166	256	4	0	455	407	381	204	204	206	58	143	236	55	45	85	143	45	261	297	57	72	43	39	81	134	118	68	43	276	32	53	107	97
304	chr1	24178707	24180375	311	552	314	289	186	158	246	3	2	198	290	263	139	126	163	341	649	297	352	473	243	414	418	206	443	311	223	265	233	372	591	199	545	434	415	209	394	412	227
305	chr1	24386098	24387230	30	126	50	11	11	7	10	17	26	20	33	31	14	5	16	100	135	59	69	85	31	131	109	47	85	25	24	36	50	76	70	38	4	23	7	17	71	52	48
306	chr1	24520774	24521536	21	33	12	4	4	2	9	4	5	11	25	17	3	5	11	40	50	25	21	13	12	50	70	21	39	23	5	11	14	20	33	9	3	21	11	37	36	30	8
307	chr1	24612423	24612950	37	47	24	3	11	7	7	22	20	14	19	25	10	7	13	64	84	28	40	29	11	45	51	23	34	10	9	19	26	18	53	16	12	17	13	13	28	21	12
308	chr1	24701370	24702343	10	29	12	2	2	0	1	5	2	4	8	8	8	3	6	13	17	8	30	22	2	50	41	16	28	5	5	11	8	10	5	3	3	1	8	2	15	10	10
309	chr1	24841482	24843115	186	452	315	220	152	137	177	162	170	189	305	260	161	147	139	377	534	282	265	459	202	400	396	195	404	312	203	276	193	347	616	223	380	362	380	222	368	389	226
310	chr1	24941502	24941913	1	3	6	7	3	6	7	14	10	23	28	23	11	10	16	8	10	9	5	8	7	9	8	9	11	9	3	6	3	14	9	3	13	12	8	3	8	17	9
311	chr1	24942442	24943200	5	12	18	12	15	11	36	49	25	84	78	66	40	35	44	6	11	36	2	11	20	3	4	25	25	9	18	16	7	17	23	14	15	31	37	6	11	15	14
312	chr1	24943819	24945511	108	278	113	98	84	63	63	74	104	57	96	87	33	27	36	258	379	133	208	294	73	178	155	77	167	86	80	139	116	194	252	113	114	201	88	78	165	121	90
313	chr1	25046946	25047903	40	60	40	37	27	18	41	26	30	30	49	45	19	14	23	93	142	41	53	67	15	102	96	24	68	47	25	41	41	71	64	19	42	28	33	26	65	76	28
314	chr1	25096798	25106702	433	582	584	665	461	534	573	590	449	677	810	860	320	331	388	712	1106	566	431	561	278	660	705	636	795	333	328	433	329	546	976	288	318	170	842	267	682	874	376
315	chr1	25107075	25109141	48	64	82	70	60	79	92	72	48	100	117	118	46	47	60	81	159	67	46	88	36	89	74	69	105	45	42	59	35	58	141	32	30	20	139	30	69	98	38
316	chr1	25109388	25114256	136	193	178	256	179	204	222	141	105	179	219	257	90	104	118	196	356	172	135	209	102	238	211	186	243	124	102	147	89	141	365	120	95	49	305	97	216	313	137
317	chr1	25114552	25119214	125	178	165	228	154	200	211	145	113	165	207	228	102	89	85	171	255	165	103	165	74	200	149	169	210	118	81	134	92	126	302	108	65	54	266	80	191	209	119
318	chr1	25119349	25121099	26	53	53	100	66	70	110	58	33	82	108	85	48	41	54	50	87	66	35	46	38	66	62	65	92	24	36	37	21	43	119	32	27	10	86	25	53	69	36
319	chr1	25121359	25132930	451	940	627	907	631	569	792	370	382	538	817	601	329	280	310	815	1120	518	477	701	391	735	620	550	890	453	407	620	506	764	1312	420	482	516	859	377	667	824	463
320	chr1	25133346	25135543	35	41	57	88	85	86	117	61	34	56	50	55	28	14	40	67	119	80	27	57	30	47	41	39	87	40	26	41	27	38	81	22	35	17	80	23	63	84	38
321	chr1	25135697	25139625	51	47	69	172	106	171	203	108	69	57	80	84	32	41	49	89	137	76	44	61	39	41	52	48	147	34	32	41	25	48	83	51	60	23	93	23	82	128	40
322	chr1	25140076	25144220	64	95	66	160	112	167	204	124	66	52	76	86	34	35	39	106	139	89	42	97	36	77	66	53	128	40	45	64	35	67	89	33	51	18	106	29	82	136	49
323	chr1	25145895	25147967	64	120	79	107	66	98	128	80	63	49	68	56	30	27	33	106	154	87	49	102	50	81	60	61	104	55	39	64	47	81	116	34	62	61	127	42	110	129	37
324	chr1	25148122	25149171	23	33	22	47	28	33	47	34	31	17	16	19	10	10	13	36	68	42	24	41	9	30	26	19	29	14	9	20	12	16	27	8	21	6	46	10	32	59	13
325	chr1	25151336	25151998	8	5	19	39	25	39	61	26	18	26	16	13	9	8	4	9	23	27	9	13	10	14	12	26	32	8	8	11	8	15	14	11	7	6	32	6	15	18	15
326	chr1	25152640	25155295	30	54	54	122	83	111	148	86	53	58	46	59	19	27	33	51	102	60	49	51	28	58	35	55	95	18	36	26	18	34	57	20	38	17	104	16	59	94	26
327	chr1	25155703	25158554	52	67	65	159	115	130	168	73	46	41	61	60	20	25	23	74	151	98	61	61	32	53	48	50	87	27	28	47	24	30	78	21	51	13	74	22	62	113	45
328	chr1	25158639	25161921	44	63	71	156	95	135	144	96	46	41	41	55	18	26	25	93	126	67	46	50	33	37	49	54	60	34	27	31	18	43	59	21	47	14	89	32	86	98	34
329	chr1	25162090	25165373	262	481	278	365	265	251	342	243	222	150	212	174	86	90	84	432	634	379	315	487	175	232	276	178	292	258	170	263	187	324	577	165	282	222	469	136	405	422	203
330	chr1	25218179	25219492	80	153	71	62	53	77	82	88	67	68	78	78	29	44	46	85	106	73	49	117	51	86	87	71	151	80	49	97	50	94	170	52	97	106	204	66	137	95	66
331	chr1	25221172	25223224	68	158	124	135	91	117	155	90	71	80	108	107	48	61	77	115	222	117	78	107	85	160	117	103	214	104	87	136	78	119	196	74	162	112	222	63	167	182	83
332	chr1	25225952	25229354	69	90	96	196	184	187	223	86	57	68	93	87	43	61	57	111	139	116	56	85	58	114	103	100	154	104	58	92	91	133	197	55	108	89	238	59	178	187	94
333	chr1	25229564	25235542	193	310	328	709	527	512	687	327	251	293	385	378	204	197	244	371	656	416	194	258	237	454	499	443	802	297	216	332	198	261	487	190	444	269	765	190	500	493	237
334	chr1	25431031	25432690	107	159	183	141	105	123	139	223	135	254	287	237	123	155	148	181	281	222	157	201	102	187	237	170	358	154	99	148	89	154	302	129	182	187	249	106	199	205	103
335	chr1	25438575	25440156	119	278	188	147	120	126	164	133	117	239	331	301	177	162	171	222	288	175	154	210	92	218	210	137	289	143	109	137	104	173	276	114	136	154	285	88	190	257	125
336	chr1	25445272	25447204	464	766	589	427	357	395	458	413	361	508	720	592	326	385	399	642	1103	734	433	801	384	688	813	482	1072	525	426	551	357	579	1199	434	630	719	779	356	794	715	433
337	chr1	25466521	25467312	25	284	27	13	8	16	19	16	17	130	218	173	103	111	108	213	395	45	15	26	12	176	310	34	352	14	10	19	122	40	80	30	28	41	281	7	137	178	10
338	chr1	25536836	25538112	129	288	147	97	71	61	77	83	116	66	107	107	45	49	54	239	354	133	152	302	90	197	230	97	181	144	96	156	128	158	412	123	184	189	153	126	182	187	113
339	chr1	25628939	25630636	126	337	121	102	76	52	67	69	94	60	122	98	56	47	42	231	321	112	141	317	92	176	113	59	147	102	98	189	156	242	334	120	179	178	154	98	150	159	92
340	chr1	25742534	25743088	39	129	41	23	17	8	13	8	6	11	26	21	11	11	7	77	106	33	50	136	32	92	53	32	36	28	40	38	58	93	118	45	25	32	36	20	39	24	41
341	chr1	25748223	25749542	40	91	89	93	61	46	71	45	32	122	161	107	56	71	93	103	143	156	41	108	81	96	65	100	115	67	57	82	60	85	129	39	57	15	56	23	71	64	45
342	chr1	25815281	25816097	13	50	16	19	12	5	6	1	5	4	12	10	5	5	6	34	35	6	21	31	9	35	9	9	17	13	13	33	16	48	61	18	15	16	11	17	14	8	12
343	chr1	26018689	26020518	203	504	259	169	104	97	113	158	181	173	345	257	102	136	128	379	554	231	223	390	143	397	367	172	369	210	159	264	193	310	515	173	317	305	330	176	295	288	182
344	chr1	26058197	26059259	137	285	179	126	88	74	107	78	77	195	239	208	97	121	124	229	328	142	146	311	96	232	180	143	258	132	116	129	135	212	349	124	214	151	239	97	175	149	130
345	chr1	26074244	26075095	42	83	28	25	19	22	22	35	30	18	54	38	26	13	16	114	180	36	46	64	19	73	107	20	44	20	22	37	38	53	60	32	31	64	35	19	41	34	31
346	chr1	26104036	26105843	159	505	205	143	81	76	142	93	141	92	174	133	71	56	70	275	432	177	222	396	125	237	171	117	113	217	127	214	191	326	342	137	349	203	261	132	186	160	170
347	chr1	26196046	26197777	39	80	123	89	47	58	88	115	62	206	245	180	109	174	160	88	135	130	42	109	62	82	84	102	135	45	74	63	40	68	145	79	87	81	175	48	70	81	66
348	chr1	26234310	26234816	24	43	19	3	7	2	7	15	11	9	18	14	6	5	4	14	22	8	22	55	14	29	11	10	21	12	12	8	9	28	46	8	8	9	16	11	18	15	3
349	chr1	26309707	26311837	183	458	292	174	126	91	137	107	131	141	195	151	79	79	81	263	411	137	260	433	147	328	255	136	240	252	169	238	225	382	489	161	304	279	269	181	314	231	184
350	chr1	26368818	26369420	87	198	94	76	46	31	49	45	50	41	49	44	19	20	19	133	190	73	114	177	48	137	86	36	79	69	51	83	73	134	178	55	94	96	116	63	93	97	57
351	chr1	26432772	26434076	136	329	154	116	80	92	112	97	86	122	160	131	58	67	67	219	309	155	141	332	92	264	196	127	177	183	130	168	139	253	444	120	191	193	255	99	200	153	125
352	chr1	26478093	26479593	131	266	123	121	77	44	70	58	80	75	146	107	53	58	60	204	283	110	143	287	81	236	190	88	142	107	110	159	138	211	363	101	140	155	186	93	147	156	116
353	chr1	26486270	26486910	23	31	57	28	16	34	38	22	15	42	55	48	23	21	39	57	83	72	19	27	23	32	34	32	55	34	26	31	31	38	73	24	48	44	69	17	37	42	29
354	chr1	26487683	26489758	106	136	104	40	26	33	57	67	57	114	140	123	60	73	82	123	170	129	85	149	70	137	94	83	190	148	97	148	111	158	223	80	129	118	148	90	176	131	71
355	chr1	26514367	26514850	10	18	19	8	15	14	14	12	7	44	58	33	19	22	11	12	21	20	11	26	13	25	11	20	26	18	9	17	8	15	39	20	16	13	26	7	18	12	23
356	chr1	26516369	26518234	100	147	194	159	96	124	161	173	125	307	467	318	174	213	194	141	253	317	119	231	164	161	194	326	338	97	137	165	91	154	294	190	143	148	394	77	191	149	167
357	chr1	26518366	26518976	22	33	42	31	27	26	38	41	28	60	59	60	23	27	30	46	58	51	45	55	25	27	51	34	54	22	20	31	18	43	68	33	24	53	60	14	45	35	30
358	chr1	26519626	26522195	38	97	78	45	33	26	43	42	29	141	181	141	76	97	65	81	111	98	54	80	46	136	102	116	133	45	46	76	35	67	95	64	37	47	150	38	78	77	70
359	chr1	26524771	26524985	0	4	3	1	1	0	1	4	3	15	4	17	6	8	3	4	4	6	2	2	2	7	2	12	10	0	4	7	2	3	5	2	0	2	13	0	4	4	6
360	chr1	26577440	26577768	2	7	4	11	7	7	8	11	3	19	20	20	5	10	13	1	4	3	2	3	4	30	13	13	27	1	2	4	6	4	10	2	2	7	6	2	1	2	4
361	chr1	26630916	26631992	142	311	179	147	97	95	117	183	169	158	275	194	128	131	125	309	442	174	178	282	125	265	291	106	272	173	117	176	133	204	419	128	192	230	274	125	200	169	133
362	chr1	26669550	26672815	227	517	342	254	154	110	163	161	198	176	243	229	100	130	121	331	518	219	333	399	190	402	280	201	258	269	212	322	296	514	475	175	499	277	401	221	398	356	236
363	chr1	26675007	26677524	18	57	152	128	111	110	172	109	48	203	222	197	83	93	113	35	74	120	46	52	103	63	41	153	174	51	49	57	50	85	92	71	183	29	229	32	84	100	92
364	chr1	26677805	26678216	1	8	9	6	2	10	12	6	4	20	21	21	9	6	5	1	6	8	2	2	6	5	1	10	15	4	5	0	4	12	10	7	4	3	17	3	6	8	11
365	chr1	26699181	26700964	223	421	304	201	121	103	116	93	122	163	245	195	92	84	80	345	505	239	292	406	176	316	308	138	282	261	197	320	210	350	476	184	409	299	352	159	299	279	249
366	chr1	26728571	26729247	43	101	22	20	12	8	14	9	9	6	20	11	2	3	4	66	93	19	54	141	16	52	41	15	23	24	29	46	39	70	105	32	38	53	54	19	26	20	23
367	chr1	26740666	26742909	168	247	182	195	113	126	166	140	111	205	282	214	98	145	121	262	422	201	143	269	126	230	271	168	345	142	109	154	120	192	389	130	236	231	363	132	315	293	144
368	chr1	26744543	26745741	131	348	143	143	93	79	96	101	112	109	212	147	97	90	98	257	361	154	160	285	95	266	204	89	188	106	91	141	136	181	352	118	202	185	202	112	201	167	100
369	chr1	26774518	26774897	2	9	8	5	5	3	7	11	11	18	18	20	16	10	18	5	10	7	10	7	8	8	8	10	21	4	7	8	2	3	11	3	7	3	11	4	11	13	3
370	chr1	26818890	26821205	253	580	439	374	235	252	311	191	210	335	483	434	205	177	235	407	657	360	289	410	259	470	455	271	460	288	256	320	249	423	636	241	517	453	538	231	467	434	336
371	chr1	26891265	26893361	123	273	243	218	147	174	252	177	147	295	348	307	152	173	189	274	407	304	168	290	139	247	244	229	323	152	130	212	119	212	400	183	227	219	345	123	221	205	157
372	chr1	26893461	26897949	298	708	396	303	192	137	243	192	225	278	445	357	177	164	175	561	829	339	509	536	247	594	441	271	457	323	293	331	330	505	655	268	564	436	461	274	415	371	326
373	chr1	26985316	26988770	249	611	425	261	223	240	281	268	258	483	633	572	294	289	284	425	725	390	264	452	244	528	465	338	552	290	250	306	243	425	609	252	365	355	531	243	447	431	242
374	chr1	27025394	27026289	115	270	86	54	42	24	47	32	55	28	60	37	22	18	17	210	257	68	161	149	53	176	141	35	92	73	85	113	122	222	232	72	190	180	121	99	106	93	69
375	chr1	27032249	27033192	52	115	75	94	71	60	80	62	46	75	115	87	48	57	45	85	125	87	52	76	48	103	88	54	126	58	52	68	34	75	130	46	70	76	116	28	72	109	39
376	chr1	27037863	27038785	12	27	30	65	62	50	56	25	19	28	37	22	26	23	21	16	34	34	6	19	22	27	26	27	80	30	13	23	25	22	53	21	50	42	51	28	48	64	29
377	chr1	27063198	27065364	356	758	477	434	247	272	334	195	188	363	533	413	187	178	197	564	835	518	326	701	301	646	334	364	422	419	309	460	336	556	971	329	707	505	649	282	517	490	356
378	chr1	27088601	27089990	163	360	161	112	106	102	144	145	119	210	271	240	131	135	136	274	388	170	174	222	116	313	344	133	327	183	129	181	157	253	343	144	203	198	293	155	284	314	150
379	chr1	27098966	27100183	110	186	177	143	96	117	113	100	83	186	236	209	96	114	110	138	242	191	121	199	133	212	224	147	266	135	125	179	99	173	298	125	240	188	271	115	226	194	142
380	chr1	27120434	27121413	83	227	107	86	49	44	56	46	63	51	97	79	32	35	52	140	176	63	107	193	62	167	108	52	121	115	84	106	82	147	217	69	180	125	153	80	147	114	77
381	chr1	27192362	27192986	29	60	23	11	9	3	16	2	9	7	17	6	4	5	6	18	33	8	14	49	38	22	7	16	17	31	30	38	29	35	84	39	70	63	73	16	28	34	15
382	chr1	27336051	27336667	28	24	28	6	6	9	5	48	36	36	52	34	19	28	27	27	62	32	32	12	10	54	68	43	115	32	17	21	11	20	33	15	65	80	55	14	31	30	9
383	chr1	27353661	27354888	379	930	436	299	228	198	281	332	414	178	326	244	126	133	132	880	1326	309	527	646	299	708	707	264	718	441	249	443	440	686	706	256	852	769	466	379	660	607	278
384	chr1	27433373	27433996	34	61	17	16	14	11	13	25	34	13	32	25	14	12	12	71	70	27	39	55	17	37	36	18	37	24	20	38	34	27	73	29	32	67	44	18	29	29	23
385	chr1	27520877	27522124	147	277	180	116	81	62	85	87	95	106	165	118	71	51	91	254	363	130	161	217	86	250	235	90	232	168	96	149	129	223	308	94	205	200	174	127	217	178	103
386	chr1	27540594	27542836	96	158	78	44	32	25	35	77	61	107	152	139	70	64	58	103	136	50	159	202	58	111	108	60	131	89	64	86	55	105	218	59	70	73	95	92	92	106	51
387	chr1	27688570	27690027	202	361	221	170	150	114	184	153	136	163	243	213	107	110	130	331	516	234	206	368	123	283	261	143	287	225	157	250	185	307	511	176	225	285	343	164	242	218	157
388	chr1	27724494	27725418	34	69	48	46	22	26	28	39	21	41	76	60	42	30	27	52	55	41	37	71	20	52	45	31	56	47	32	33	18	37	70	16	33	19	37	31	55	50	22
389	chr1	27802926	27803435	78	124	52	29	23	16	18	10	27	5	26	20	12	6	3	111	117	38	75	124	38	71	50	26	47	37	47	87	53	87	119	56	110	91	46	39	50	64	44
390	chr1	27807849	27810443	22	35	48	151	95	83	106	100	53	87	100	117	46	76	65	56	88	88	22	31	49	39	38	63	78	25	20	34	23	49	119	35	38	33	94	37	63	74	56
391	chr1	27820211	27821085	6	8	9	31	29	26	45	14	11	14	21	31	15	7	14	22	21	18	13	8	8	17	10	11	19	4	3	11	3	8	35	8	11	6	25	14	26	22	9
392	chr1	27822010	27826097	124	165	161	383	300	285	414	538	321	219	351	267	143	169	172	256	419	314	184	189	163	179	242	153	420	97	89	124	119	212	391	123	212	219	244	218	294	267	157
393	chr1	27829649	27831215	26	41	51	117	88	95	125	72	40	47	62	66	36	36	47	59	89	65	49	33	45	53	68	53	91	37	24	37	28	50	118	34	71	47	111	41	92	96	55
394	chr1	27831431	27834420	64	148	82	162	104	113	148	91	78	79	108	101	44	37	70	110	178	79	97	55	81	139	226	88	271	78	46	60	81	133	147	44	145	153	166	145	302	287	98
395	chr1	27857673	27860341	177	326	254	293	226	210	284	297	226	186	272	226	133	142	166	340	598	280	244	302	172	268	329	159	454	176	145	212	152	253	347	135	325	276	347	151	353	356	184
396	chr1	27861720	27862517	37	58	72	43	31	37	57	58	33	61	78	65	35	42	41	45	86	66	33	42	24	57	45	49	87	32	29	41	35	49	66	27	68	52	77	25	60	71	49
397	chr1	27870841	27871892	144	162	300	124	114	142	207	100	83	224	298	295	166	155	175	113	206	233	62	213	227	110	176	153	282	157	173	244	134	219	571	178	223	314	478	170	227	234	170
398	chr1	27924521	27925659	70	166	70	48	47	23	42	35	47	32	51	45	21	23	32	131	150	63	86	183	51	122	73	39	86	66	55	84	73	131	175	52	91	74	99	57	97	94	64
399	chr1	27971313	27973017	95	228	165	118	117	105	178	124	119	165	250	206	138	129	125	190	295	183	84	236	108	228	154	172	276	125	108	136	102	175	321	138	116	153	328	74	129	112	112
400	chr1	28029512	28030463	172	437	300	213	152	140	196	127	115	245	378	291	135	135	162	325	506	259	183	345	191	363	321	213	329	261	195	217	165	315	538	212	374	316	430	190	375	299	224
401	chr1	28068060	28068677	44	58	52	58	36	37	45	31	21	31	43	47	21	16	37	56	84	75	34	52	31	34	37	43	82	70	28	45	26	46	103	20	39	71	60	37	60	76	26
402	chr1	28071485	28073155	150	184	115	109	85	64	127	108	115	38	73	62	46	30	51	155	186	83	150	225	74	149	202	87	310	156	64	196	78	157	222	57	156	229	144	79	139	226	59
403	chr1	28074228	28074795	11	19	23	48	66	83	85	57	40	27	24	30	15	26	21	13	22	28	21	21	16	13	42	24	125	28	19	33	13	17	28	8	22	19	40	15	22	62	13
404	chr1	28075372	28075677	7	9	6	17	10	16	19	11	10	5	3	2	3	9	1	11	10	5	6	5	6	6	12	7	31	11	2	11	2	8	13	2	2	14	12	0	14	20	1
405	chr1	28081065	28081894	15	31	13	40	30	46	54	25	22	11	12	13	8	3	8	23	27	14	22	18	11	25	53	12	90	31	14	17	8	21	32	5	18	12	17	8	26	47	11
406	chr1	28082142	28084654	31	36	61	110	125	160	211	125	71	66	76	65	48	53	46	39	73	65	66	51	43	69	92	90	309	61	28	53	24	40	95	22	56	64	117	26	72	160	30
407	chr1	28088606	28089074	10	13	14	26	18	36	33	26	19	18	14	20	13	16	13	8	19	28	22	18	11	18	23	21	53	8	5	16	2	15	27	6	15	5	29	6	22	28	16
408	chr1	28113265	28114217	91	239	127	106	70	66	86	88	61	103	135	118	67	74	87	161	242	131	110	188	84	146	163	90	171	145	99	94	121	145	281	95	166	122	199	82	178	172	85
409	chr1	28158667	28159504	82	162	78	49	40	19	31	31	38	38	72	48	26	27	24	133	193	74	75	150	43	118	95	38	105	53	59	82	62	100	178	75	74	144	101	45	81	80	58
410	chr1	28286909	28288142	111	250	194	132	108	124	166	175	128	186	264	239	126	144	131	225	396	207	133	303	131	255	228	142	371	143	103	128	105	157	393	121	266	235	289	100	248	217	142
411	chr1	28346401	28347617	62	71	84	38	23	40	34	66	41	192	189	196	124	121	125	54	99	43	61	86	53	74	88	64	226	48	36	79	12	33	60	20	99	86	107	41	38	71	30
412	chr1	28371615	28372100	8	12	19	55	54	42	62	18	12	26	22	29	13	23	22	11	19	30	6	9	15	14	15	23	42	10	7	10	3	8	18	6	19	23	44	5	6	14	7
413	chr1	28372610	28373128	12	17	3	53	40	36	30	9	9	16	16	9	3	6	7	19	28	5	18	14	0	12	11	5	21	9	3	5	3	1	10	1	13	24	23	12	6	7	2
414	chr1	28375550	28376050	30	45	25	71	40	45	65	25	24	23	27	28	7	12	9	75	87	27	52	33	21	37	73	18	99	60	10	39	18	22	60	11	55	89	62	35	27	42	13
415	chr1	28431822	28432274	57	131	85	75	20	46	54	47	52	59	96	72	36	43	39	82	127	83	48	116	55	117	89	60	94	75	53	66	49	98	203	62	105	93	122	52	95	110	66
416	chr1	28434720	28436046	215	407	259	230	162	144	196	203	159	179	309	257	143	129	148	341	513	271	261	416	163	408	357	193	378	242	187	273	199	320	527	190	296	258	383	176	308	253	178
417	chr1	28445462	28446782	44	81	125	72	67	69	115	115	62	168	211	166	105	88	115	95	118	178	66	96	77	77	48	134	161	53	88	98	39	62	134	57	55	99	146	38	35	38	34
418	chr1	28458064	28459067	188	374	192	117	53	56	79	70	98	84	138	113	54	64	78	343	557	157	242	372	127	318	386	107	322	188	127	205	181	315	453	132	289	355	216	159	228	284	119
419	chr1	28527801	28529079	106	198	251	174	103	124	185	172	127	277	320	282	155	176	193	211	348	278	101	228	154	236	217	175	367	136	155	135	113	202	369	131	275	245	359	117	232	219	171
420	chr1	28568439	28569706	117	284	199	109	84	73	73	82	73	123	174	153	86	65	67	200	312	153	155	288	112	233	246	119	153	135	120	106	126	201	325	121	190	162	252	119	149	152	147
421	chr1	28704597	28714733	517	1195	3636	3441	2194	2583	3578	2068	1063	4593	4949	4505	2229	2225	2768	917	1523	3713	616	1524	2078	2166	1150	3732	3253	850	1675	1629	911	1746	2353	1510	2276	1161	4892	765	1600	1498	2291
422	chr1	28714856	28715125	4	7	11	10	15	5	14	4	6	21	17	30	5	8	11	8	9	7	2	15	8	10	7	11	7	6	5	13	11	13	23	8	9	2	29	3	3	6	8
423	chr1	28717168	28718159	89	279	126	101	57	46	58	51	66	46	102	73	35	24	31	161	212	77	101	216	57	171	98	61	90	128	87	92	127	224	267	85	214	110	163	68	129	112	109
424	chr1	28751510	28752786	122	291	140	123	84	64	122	78	84	104	154	134	58	77	55	220	307	131	126	260	58	198	173	95	156	126	98	121	125	168	275	112	146	171	188	81	144	147	106
425	chr1	28775970	28778243	47	137	304	474	283	263	403	139	67	668	631	598	294	296	322	57	100	366	43	141	200	228	77	409	232	102	216	213	81	222	254	128	128	55	551	55	160	159	222
426	chr1	28778484	28779245	6	24	48	66	55	48	72	34	12	80	90	84	33	39	40	12	18	55	5	21	22	29	13	64	36	9	29	20	17	33	44	30	14	5	79	10	15	21	24
427	chr1	28779442	28781717	687	1759	972	885	590	556	707	507	597	552	901	685	331	323	406	1075	1551	826	666	1141	611	1149	896	606	1060	846	618	961	732	1104	1836	613	1237	1043	1355	511	1139	1007	572
428	chr1	28791549	28791780	14	21	9	2	3	0	4	5	1	0	2	0	2	2	0	2	7	0	10	6	4	1	3	2	1	5	6	7	9	27	12	3	24	23	15	6	24	10	13
429	chr1	28841802	28843063	370	644	530	494	299	334	423	485	404	423	536	447	233	231	277	527	801	540	379	796	359	634	555	379	772	395	350	391	324	585	941	374	663	598	719	315	591	505	394
430	chr1	28847092	28848651	940	1198	3556	3698	2913	3322	4729	3164	1887	4170	4722	4085	1663	2271	2346	1429	2331	4380	699	1390	2178	1582	1340	3701	4889	994	1702	2064	945	1995	2242	2256	3760	2532	4214	1194	2058	2030	2067
431	chr1	28867272	28869267	153	298	333	261	191	186	254	273	172	397	457	327	189	215	225	303	399	349	175	285	211	250	256	295	370	132	211	232	211	307	373	194	394	298	380	143	284	237	213
432	chr1	28935410	28936697	120	257	148	97	81	66	73	62	72	66	116	85	38	31	43	237	332	88	157	185	106	200	187	59	153	125	107	129	127	186	255	74	252	214	166	99	187	187	86
433	chr1	29083929	29084407	14	17	13	24	16	16	18	19	27	5	13	14	4	2	13	20	40	29	19	34	6	10	22	5	23	23	16	23	9	17	34	12	13	18	10	9	14	11	8
434	chr1	29085807	29087027	64	132	61	51	43	23	44	42	57	17	39	34	15	17	14	116	167	74	111	100	29	99	71	21	79	52	51	76	40	58	108	21	18	81	36	23	54	38	24
435	chr1	29113120	29114223	31	59	45	68	44	34	28	13	20	18	24	24	11	16	13	66	99	46	86	104	13	74	35	18	26	24	17	26	19	43	53	15	22	28	23	16	29	8	26
436	chr1	29344658	29345932	6	15	19	38	22	34	32	43	20	62	51	77	34	30	31	15	28	33	10	14	23	23	24	37	48	11	9	16	2	17	17	10	19	9	44	8	26	41	15
437	chr1	29379233	29381826	258	480	283	212	144	119	194	143	150	246	343	272	138	133	139	390	533	244	262	437	172	361	338	165	342	197	204	246	265	384	543	205	374	386	391	195	331	286	210
438	chr1	29429506	29430514	123	325	136	95	74	64	112	95	108	96	130	129	64	62	58	251	370	146	156	271	78	198	255	81	185	131	77	119	119	201	284	102	189	188	177	121	174	170	98
439	chr1	30964043	30965732	64	158	83	83	58	44	69	112	111	39	86	76	44	45	25	140	201	65	92	184	57	119	113	53	149	59	49	91	59	103	186	67	69	104	107	61	72	116	54
440	chr1	30974627	30976252	34	33	23	20	10	21	18	33	32	24	39	28	22	19	21	27	41	8	46	17	9	41	70	31	64	27	8	34	16	36	73	6	39	26	43	39	33	57	11
441	chr1	30976324	31009128	1112	1419	1693	2153	1531	1623	2253	1518	1014	1860	2203	2298	1077	1158	1260	1273	2123	1618	1577	1841	1079	2044	2052	2104	3891	1279	1363	1685	847	1483	2992	956	1628	1596	2969	1469	2168	3085	1390
442	chr1	31010131	31011894	22	29	46	85	48	51	76	43	36	17	25	26	16	18	16	20	33	17	80	81	34	50	63	51	135	57	54	90	26	28	72	16	67	39	118	50	96	113	58
443	chr1	31126772	31127149	2	1	5	4	2	0	0	1	2	0	3	2	1	3	1	6	6	3	2	2	0	10	8	4	7	6	1	4	4	4	9	1	10	9	11	13	7	16	2
444	chr1	31174661	31176788	24	36	56	41	33	32	47	66	31	95	100	125	38	51	56	54	72	66	33	48	21	63	58	53	98	33	21	27	32	47	64	41	41	21	56	44	71	102	27
445	chr1	31310234	31311629	132	276	162	143	88	69	118	85	100	131	203	182	84	83	88	272	389	188	172	223	94	229	224	107	231	158	104	140	127	195	337	108	266	214	222	110	225	225	117
446	chr1	31400120	31401228	54	149	61	36	46	25	40	21	38	19	47	37	17	18	16	87	107	30	63	88	36	64	58	25	44	63	53	86	54	86	118	40	89	62	52	38	52	61	29
447	chr1	31541576	31542911	210	503	255	225	151	125	199	207	208	170	295	225	129	106	144	353	502	256	256	446	198	476	355	166	415	250	191	236	210	330	636	198	361	278	383	202	412	383	209
448	chr1	31668878	31669466	16	22	20	20	12	6	12	6	2	8	16	8	9	6	7	2	9	6	6	25	22	16	3	11	10	27	23	30	37	46	104	22	29	66	36	37	35	44	17
449	chr1	31727966	31729284	18	16	49	71	42	48	66	12	10	41	34	16	11	16	16	3	2	4	3	22	50	14	8	23	42	30	55	62	28	52	87	57	78	84	129	38	40	38	54
450	chr1	31744054	31747990	73	43	60	122	132	86	126	46	23	49	81	76	45	35	54	25	27	17	32	84	84	49	52	50	91	157	98	143	176	262	569	129	231	309	305	280	301	372	173
451	chr1	31787229	31788196	16	23	27	14	13	20	20	24	13	50	50	35	23	31	32	15	25	5	19	25	20	27	39	23	55	29	29	38	30	29	72	36	71	41	73	36	73	71	29
452	chr1	31881773	31883745	105	206	165	112	82	86	108	123	99	143	219	158	93	109	107	163	295	132	136	184	85	195	231	102	296	134	107	149	100	177	285	101	199	150	206	90	216	217	121
453	chr1	32026184	32026975	55	117	80	53	37	30	43	45	33	62	89	79	58	47	44	71	138	73	82	93	41	131	101	58	121	46	38	57	55	63	107	49	54	43	69	36	74	69	45
454	chr1	32127309	32127948	25	38	54	45	30	39	44	102	56	95	120	111	47	45	64	51	82	97	38	39	39	41	34	75	131	17	30	43	20	44	44	34	44	46	88	30	60	36	31
455	chr1	32142871	32144274	15	22	38	66	44	65	51	89	55	79	90	119	46	39	43	48	55	55	21	39	31	60	48	61	109	14	16	15	13	24	39	19	26	12	58	14	44	58	37
456	chr1	32170753	32171093	2	2	1	22	17	22	14	14	7	7	15	14	11	8	9	3	4	6	4	2	3	12	4	33	29	0	8	5	1	1	6	1	4	2	12	2	2	6	4
457	chr1	32174914	32177126	174	341	155	165	108	76	131	125	151	101	149	102	62	69	59	296	410	144	217	357	118	320	252	139	265	116	119	177	170	275	357	149	269	213	204	134	207	157	148
458	chr1	32181365	32183599	193	458	298	273	210	202	304	205	192	247	369	280	150	146	179	364	475	325	230	313	186	470	362	364	557	229	127	208	170	305	457	200	316	307	339	185	481	364	211
459	chr1	32251128	32252865	210	541	254	185	122	109	133	147	179	176	251	210	107	98	110	468	646	215	253	413	151	363	305	167	271	236	163	235	227	351	573	177	336	312	345	167	288	283	198
460	chr1	32304679	32305292	2	7	12	13	6	17	15	17	7	37	30	33	20	16	18	4	11	18	7	8	9	14	6	25	18	3	4	8	0	11	13	6	6	4	14	1	7	2	7
461	chr1	32310456	32311975	166	407	182	131	81	77	90	100	132	150	219	189	84	81	103	307	448	193	172	315	105	288	233	100	189	189	99	162	143	295	426	124	204	253	247	140	220	196	130
462	chr1	32345942	32346944	57	117	85	58	34	38	56	63	52	70	112	91	38	51	48	93	130	76	55	111	56	117	65	49	123	65	59	57	25	67	157	53	72	74	133	45	81	96	55
463	chr1	32417057	32419214	221	559	266	240	129	122	189	121	129	159	276	244	142	124	121	420	647	226	304	418	144	406	397	187	337	205	155	260	244	346	583	210	328	349	391	178	376	351	189
464	chr1	32436427	32437859	22	26	45	48	34	53	63	43	19	69	75	106	41	56	53	37	43	47	20	34	17	48	35	54	64	21	32	31	23	29	55	16	32	15	79	25	31	59	34
465	chr1	32438314	32440236	58	126	114	162	105	101	145	87	85	169	247	196	96	115	126	162	249	121	69	140	80	117	158	111	152	94	58	91	76	118	242	124	136	127	223	67	142	105	85
466	chr1	32443532	32444621	85	174	87	68	54	39	69	57	61	61	112	91	46	42	47	131	206	62	106	182	42	132	103	50	91	101	53	91	81	98	179	73	97	74	149	73	83	83	67
467	chr1	32460313	32461012	56	130	98	89	61	67	75	66	63	75	137	105	53	62	66	113	200	94	67	132	57	136	120	64	123	88	69	74	64	92	201	84	83	96	154	76	144	129	72
468	chr1	32478549	32479874	55	90	38	34	21	16	28	33	29	35	46	39	27	22	20	57	72	24	35	32	18	42	54	18	42	83	69	102	36	47	167	31	53	64	104	50	32	51	35
469	chr1	32486402	32486808	19	31	11	6	5	2	1	4	3	7	11	10	8	3	8	16	20	12	22	25	5	21	24	11	7	14	9	24	26	20	25	9	25	18	26	14	13	18	16
470	chr1	32487867	32491119	244	408	273	117	77	105	147	247	206	396	511	443	196	198	216	415	612	383	309	397	249	286	275	230	415	274	212	306	186	275	422	151	358	242	457	172	319	299	190
471	chr1	32491551	32492533	15	15	37	29	26	27	36	26	21	60	88	63	25	35	34	55	77	67	40	67	15	31	43	30	67	20	21	38	17	36	63	29	29	21	80	10	30	28	21
472	chr1	32529488	32530933	122	260	169	123	92	76	115	95	95	134	192	145	73	73	72	185	279	156	121	269	121	204	168	128	174	119	110	162	160	220	341	99	195	194	241	96	150	136	126
473	chr1	32568029	32575024	472	1040	555	431	326	301	431	291	350	551	802	685	291	323	273	862	1324	453	549	827	402	696	534	384	536	445	406	652	570	735	975	401	823	813	845	393	537	600	405
474	chr1	32589262	32590206	105	197	113	50	43	23	55	36	41	53	83	51	34	19	31	167	206	104	71	143	55	122	96	50	73	81	69	116	88	131	230	78	131	176	130	81	97	97	68
475	chr1	32599921	32600674	13	23	13	3	7	4	4	4	6	11	26	18	6	11	6	29	51	7	24	15	12	27	32	7	18	11	6	14	16	22	32	14	21	10	18	24	45	28	10
476	chr1	32632151	32633326	117	214	134	111	104	93	95	172	149	133	211	169	102	125	111	212	325	171	112	248	86	168	187	125	227	130	91	136	100	193	382	134	120	171	253	83	144	146	85
477	chr1	32738590	32739202	19	64	24	27	16	11	15	6	10	3	16	8	12	8	4	81	102	19	40	70	13	52	46	7	28	16	3	16	50	66	62	32	67	41	29	26	22	16	22
478	chr1	32777491	32778420	28	33	18	14	5	4	13	23	15	23	38	19	14	9	17	76	117	37	54	53	7	24	32	10	21	6	12	7	16	26	20	9	48	15	25	13	15	9	9
479	chr1	32850215	32850790	30	75	35	4	6	12	13	19	25	34	40	27	16	18	18	63	101	43	27	58	19	43	67	32	45	39	28	39	37	44	70	13	33	36	58	16	48	36	17
480	chr1	32888123	32890087	187	301	323	221	168	186	232	268	198	285	332	314	187	183	227	289	453	329	196	302	226	299	278	248	466	198	191	244	161	306	469	194	392	369	427	156	315	333	205
481	chr1	33010799	33012873	28	55	40	60	46	40	62	53	41	61	113	97	43	52	50	59	130	33	59	73	27	80	90	54	118	24	36	32	26	34	83	37	49	22	77	30	85	104	32
482	chr1	33054484	33058380	229	494	427	440	331	323	411	289	210	393	473	438	202	220	243	374	545	382	247	362	272	481	348	349	651	347	206	288	241	424	589	255	637	419	626	254	415	415	276
483	chr1	33201945	33203645	255	659	272	248	159	126	173	158	225	137	287	188	103	98	110	656	879	333	395	614	164	539	558	207	433	218	229	315	271	516	684	226	402	629	350	267	449	399	265
484	chr1	33218887	33220427	41	53	86	121	94	109	143	100	71	119	112	124	71	97	72	81	133	130	37	41	54	55	87	77	204	50	47	72	28	55	94	47	110	117	154	59	95	94	58
485	chr1	33229793	33231594	31	41	60	110	72	113	118	79	53	89	115	100	71	58	73	80	157	110	39	57	42	57	74	96	167	40	31	32	29	46	105	41	67	72	124	24	94	71	54
486	chr1	33274324	33275549	55	103	43	54	39	42	56	42	29	64	92	86	44	43	47	78	146	77	65	87	49	109	103	61	98	71	56	53	51	75	177	31	60	65	116	53	85	75	47
487	chr1	33318978	33319569	12	34	12	30	16	26	26	31	38	25	38	46	12	22	16	99	102	61	18	25	10	36	37	31	38	49	30	44	10	37	28	7	16	37	9	39	45	55	26
488	chr1	33358010	33359127	1	4	0	13	9	13	27	15	15	13	5	8	6	7	3	122	206	72	2	6	2	4	3	1	6	32	11	20	1	3	5	1	5	2	4	3	5	4	1
489	chr1	33364533	33366876	92	171	211	199	161	172	258	185	115	370	397	348	174	197	246	213	410	337	157	171	152	219	237	198	393	163	150	173	127	205	386	149	215	221	377	128	243	275	171
490	chr1	33420007	33420419	27	62	21	16	15	14	10	12	19	17	28	17	9	6	9	45	63	22	19	75	26	54	45	14	26	28	25	35	31	46	79	26	32	52	27	16	45	29	19
491	chr1	33493620	33495401	57	144	77	79	41	34	57	40	60	36	62	56	28	18	34	162	159	65	121	142	35	89	141	35	107	30	9	21	77	92	111	45	51	29	32	23	56	40	17
492	chr1	33587353	33588947	150	336	170	160	113	72	98	70	110	62	124	97	55	34	39	310	418	154	241	353	122	263	205	100	148	121	129	180	136	245	336	100	273	237	197	103	121	114	91
493	chr1	33710369	33711175	39	124	54	27	28	23	32	27	25	41	64	74	28	22	36	92	135	57	45	97	44	77	67	29	51	48	41	42	46	70	109	43	66	70	94	31	64	48	49
494	chr1	35097188	35098373	194	376	187	104	80	59	80	55	73	96	134	129	66	57	69	341	510	142	214	262	121	320	298	88	246	205	132	149	183	335	378	115	323	341	247	163	301	251	136
495	chr1	35103908	35105008	68	125	68	60	45	41	45	44	41	26	47	50	24	12	24	123	188	55	82	86	47	129	152	50	131	73	45	57	82	104	169	50	166	122	117	51	119	98	48
496	chr1	35222598	35223892	170	334	210	117	100	75	96	82	98	101	176	138	67	51	66	267	361	156	155	273	104	295	282	115	204	158	148	192	136	279	365	141	254	249	247	145	249	186	157
497	chr1	35268825	35270329	98	182	152	99	88	90	109	106	103	178	261	156	101	104	130	148	244	184	82	208	102	151	153	170	230	110	108	153	94	162	308	129	156	144	239	88	190	153	122
498	chr1	35317151	35317993	58	145	92	98	76	70	86	45	56	94	121	115	61	60	76	136	184	97	86	104	62	109	102	61	116	100	59	99	68	108	208	78	111	148	159	63	103	105	76
499	chr1	35410874	35414695	23	75	130	176	147	142	236	157	52	311	290	334	160	169	149	83	119	212	37	69	72	113	49	204	210	57	71	70	34	59	119	66	64	14	207	33	69	142	92
500	chr1	35415352	35416228	7	12	22	30	38	27	48	18	6	32	35	37	14	24	18	17	30	27	3	8	12	18	8	36	34	8	10	9	5	18	13	16	11	6	28	3	17	23	18
501	chr1	35424377	35425830	8	18	31	51	45	57	54	42	18	61	84	85	31	30	37	14	20	59	7	20	13	32	8	50	46	19	11	24	6	25	39	19	13	8	45	5	23	17	16
502	chr1	35425926	35426769	2	4	24	31	18	26	42	33	10	38	43	65	16	18	14	9	11	29	5	14	8	11	8	34	24	5	4	9	3	13	12	18	6	2	23	4	9	14	8
503	chr1	35426977	35428024	2	15	23	24	19	20	39	24	12	45	51	44	21	20	18	19	25	25	7	7	11	8	17	35	40	9	11	9	6	10	15	8	15	1	24	6	15	16	11
504	chr1	35428812	35432020	317	804	544	434	311	313	420	431	330	467	587	530	298	291	309	615	992	593	394	630	395	697	617	381	775	474	340	477	425	583	906	331	676	507	732	362	720	726	365
505	chr1	35506464	35507543	88	180	127	84	43	41	35	56	55	60	128	81	31	44	55	153	218	89	103	153	76	161	145	60	122	88	52	84	97	152	152	74	153	146	113	67	115	121	76
506	chr1	35795052	35796456	217	467	259	153	125	98	107	115	129	107	202	144	71	61	61	380	518	181	263	361	165	385	407	131	294	219	172	245	221	360	546	185	355	367	298	175	312	296	191
507	chr1	35815311	35816597	85	123	82	22	19	28	31	34	36	47	77	56	28	28	30	112	140	84	63	64	59	59	50	33	108	116	78	80	67	105	189	30	141	119	98	67	109	93	73
508	chr1	35879411	35880213	168	373	236	171	147	128	177	166	163	203	288	225	133	131	138	311	483	275	197	405	171	315	277	197	358	210	173	209	166	273	639	177	301	297	375	152	268	272	177
509	chr1	35956576	35957597	91	204	110	73	50	46	65	57	40	55	114	79	31	42	38	133	268	83	122	198	70	144	193	46	129	76	57	83	89	123	158	53	151	135	147	63	102	104	71
510	chr1	36007185	36008555	227	612	341	227	145	130	172	145	149	176	292	240	120	92	113	390	597	255	255	582	194	410	333	148	256	317	202	263	248	410	681	232	548	303	401	193	410	367	216
511	chr1	36121173	36121998	98	214	71	74	38	24	28	23	43	18	68	46	17	10	11	196	245	60	118	257	42	153	108	19	55	63	59	66	115	162	248	77	117	167	97	65	66	67	77
512	chr1	36168274	36169888	318	595	258	144	108	70	116	77	133	102	188	158	93	78	65	477	665	192	366	530	177	428	409	135	312	231	183	244	258	430	570	185	365	381	296	201	296	299	206
513	chr1	36261231	36262296	6	23	109	46	53	58	89	42	31	130	124	116	60	60	59	6	12	50	13	14	59	14	5	41	59	3	8	6	2	2	12	3	12	10	22	0	8	8	15
514	chr1	36326700	36328209	233	429	204	148	109	73	121	92	126	84	142	170	75	67	77	320	453	153	236	339	134	310	302	101	256	238	149	191	176	270	406	123	345	314	257	132	287	254	170
515	chr1	36387041	36389409	116	251	142	159	123	106	142	136	94	124	176	138	68	86	73	258	285	129	90	237	100	222	173	119	226	128	105	138	113	170	381	102	197	203	281	92	186	190	109
516	chr1	36393270	36395417	245	508	255	153	125	90	114	92	147	127	213	165	90	72	87	390	558	145	263	414	170	386	338	149	317	243	203	278	218	348	566	180	367	338	289	201	274	259	189
517	chr1	36398634	36400703	88	184	123	112	97	111	132	154	129	144	165	172	85	90	88	165	309	134	85	124	82	152	210	101	235	116	42	95	113	166	195	67	229	96	196	76	220	195	93
518	chr1	36420999	36422041	7	13	24	22	15	15	22	19	14	42	36	39	13	24	29	9	12	17	3	8	15	14	12	20	22	3	9	16	1	16	24	10	16	12	38	5	12	18	16
519	chr1	36461327	36463420	190	299	291	176	164	182	226	253	207	357	461	373	193	195	251	270	454	319	197	263	185	266	308	233	468	231	153	232	159	238	503	188	329	321	412	161	295	309	182
520	chr1	36543657	36545735	243	476	178	88	57	63	91	161	174	137	239	170	97	84	85	354	542	155	181	308	89	207	226	148	217	147	115	220	165	319	419	128	153	205	223	124	203	203	134
521	chr1	36611809	36613320	96	110	105	134	75	90	120	115	97	121	165	137	83	100	89	169	264	143	81	107	66	116	150	79	242	94	48	86	58	142	241	87	102	107	152	66	116	141	53
522	chr1	36623659	36626210	223	318	277	286	209	206	287	234	188	305	327	327	181	225	231	367	561	373	326	449	225	344	435	260	825	235	152	345	206	290	451	183	300	407	382	160	338	420	169
523	chr1	36635409	36636495	108	278	143	128	75	87	95	63	86	124	177	145	79	72	86	258	377	154	172	358	96	259	220	93	179	120	85	137	149	209	388	137	150	123	219	101	191	159	102
524	chr1	36638863	36640090	90	111	101	4	6	4	12	47	40	52	82	70	44	29	46	149	236	195	144	211	47	17	7	5	14	9	3	3	11	25	52	8	16	25	23	141	180	213	181
525	chr1	36688443	36689281	95	221	103	65	53	41	69	61	64	76	129	90	55	53	56	244	327	79	113	199	62	193	184	72	127	117	92	91	127	166	293	81	166	184	148	90	177	135	76
526	chr1	36692099	36692914	2	3	24	17	19	21	23	14	15	25	43	40	15	17	29	7	11	19	6	7	17	12	8	21	34	4	13	16	5	14	16	7	12	7	34	8	12	16	8
527	chr1	36701776	36703533	135	357	205	138	121	85	154	159	121	170	279	212	131	118	153	262	407	200	178	340	118	283	193	158	224	149	129	136	137	206	412	130	231	190	272	118	211	233	115
528	chr1	37527037	37527995	17	37	41	40	21	40	43	37	21	69	86	69	52	63	63	31	49	62	18	33	41	49	37	50	106	43	21	60	27	48	77	33	26	32	53	36	74	51	50
529	chr1	37712198	37724443	896	1779	1047	1119	787	791	1009	724	661	906	1205	1109	583	573	606	1802	2506	1000	935	1389	645	1206	1279	748	1273	831	690	1110	961	1405	2023	815	1339	1228	1540	735	1338	1499	892
530	chr1	37752530	37753837	131	275	143	124	79	72	89	61	59	83	136	108	64	61	62	200	252	93	137	237	72	251	217	114	189	121	101	137	152	203	363	128	212	227	205	111	192	171	112
531	chr1	37791915	37792801	42	99	79	53	29	46	51	56	45	67	94	91	36	46	64	95	128	60	46	107	55	92	108	75	116	72	51	55	46	78	147	53	90	82	111	47	109	86	62
532	chr1	37833573	37834424	130	238	97	98	88	74	85	73	64	85	154	137	61	55	92	188	262	119	128	218	85	179	173	88	160	131	87	124	97	148	317	86	140	175	228	96	184	161	100
533	chr1	37914086	37914984	11	24	31	9	16	22	18	20	17	67	49	50	41	42	58	32	34	45	21	18	19	43	28	32	67	23	12	21	19	28	22	20	27	29	32	11	34	27	22
534	chr1	37928496	37929497	49	116	77	83	61	48	66	31	36	84	146	90	47	62	59	71	123	111	54	154	53	105	76	90	96	38	50	55	73	108	242	83	72	67	179	39	64	44	78
535	chr1	37929729	37931432	98	261	126	124	85	56	104	69	84	102	172	89	47	65	57	148	216	131	95	252	76	195	98	75	104	128	104	156	90	174	243	79	187	92	227	76	166	109	110
536	chr1	38031968	38033015	40	77	32	23	18	8	8	8	18	8	27	14	12	6	11	132	198	56	94	98	28	84	88	25	42	29	13	27	40	63	96	26	48	39	40	23	19	16	7
537	chr1	38040160	38041187	7	12	21	19	20	11	24	25	10	52	40	42	21	24	16	18	23	28	4	6	13	21	14	29	34	6	15	8	7	15	15	7	12	8	33	2	17	21	13
538	chr1	38042062	38043233	4	15	29	33	22	17	25	18	10	45	49	35	11	23	17	7	17	33	8	6	12	15	13	21	35	5	18	12	7	16	16	22	14	1	37	6	9	15	14
539	chr1	38045593	38047159	182	450	202	125	97	71	104	103	120	85	171	147	48	64	67	361	496	171	250	356	127	352	262	107	223	155	139	213	209	311	396	151	261	215	205	127	253	215	139
540	chr1	38097329	38099247	152	345	232	184	118	124	152	72	90	149	214	189	73	71	80	235	333	220	200	331	118	257	258	168	218	176	162	163	138	255	433	125	205	183	287	122	205	216	194
541	chr1	38161003	38161999	10	21	26	33	23	30	52	20	10	75	82	69	46	43	52	9	24	46	2	17	26	18	21	61	60	8	20	19	4	8	21	24	25	9	64	10	18	20	21
542	chr1	38169525	38170466	48	112	57	31	29	16	25	30	34	26	54	46	27	25	19	88	101	38	56	93	29	93	66	33	44	58	38	45	64	101	118	42	89	48	69	64	91	81	49
543	chr1	38184224	38186113	52	100	55	48	39	34	46	63	59	66	107	91	51	67	68	158	206	134	67	116	50	92	107	68	132	66	64	107	41	67	111	41	65	90	124	45	82	49	40
544	chr1	38227611	38228759	106	199	127	96	81	74	95	90	82	127	159	140	72	79	97	172	277	110	88	215	102	149	175	107	164	110	102	114	94	176	277	101	155	151	231	96	162	135	102
545	chr1	38233942	38234817	20	61	25	1	1	1	2	2	6	4	8	11	0	4	1	73	81	29	10	11	10	63	64	27	42	61	34	53	2	8	18	3	70	22	54	18	11	23	6
546	chr1	38243411	38243988	49	129	43	18	10	4	3	14	14	6	30	12	4	6	4	72	96	29	69	141	37	84	41	33	41	37	27	62	24	69	72	18	42	75	34	38	34	31	32
547	chr1	38250463	38251678	68	188	149	70	86	63	109	93	99	157	233	184	101	114	130	151	206	142	91	191	100	171	206	119	211	116	75	88	68	152	305	115	116	136	204	83	168	149	69
548	chr1	38265629	38268825	47	78	85	137	88	70	104	51	43	87	101	94	64	62	79	58	85	86	35	75	67	105	69	88	149	102	52	90	45	77	186	45	90	56	147	69	112	147	98
549	chr1	38284699	38285793	70	87	33	9	13	4	11	7	7	1	2	2	1	4	3	19	17	6	7	34	12	12	7	4	9	42	26	42	56	93	222	43	65	100	98	31	33	32	31
550	chr1	38712660	38715944	78	111	205	76	108	164	157	387	239	314	343	325	134	164	161	151	213	345	110	125	207	130	126	211	399	74	111	129	59	127	148	90	143	136	198	66	143	146	132
551	chr1	39097128	39098821	106	238	86	90	68	53	67	63	63	58	117	81	46	67	54	201	258	95	132	195	58	144	150	53	131	117	83	158	83	153	233	107	142	149	138	78	126	114	63
552	chr1	39110873	39112781	103	256	137	119	80	70	104	74	68	131	223	166	94	94	88	159	304	158	113	335	70	218	162	131	123	115	90	147	96	197	355	127	100	125	212	96	169	143	93
553	chr1	39228867	39229994	193	332	177	137	87	64	91	65	94	84	125	89	39	44	43	305	453	130	192	329	111	278	267	99	221	148	133	176	164	276	396	132	253	307	192	169	220	211	139
554	chr1	39264036	39265406	127	229	157	192	135	132	135	205	149	189	269	223	86	113	112	202	337	200	141	259	121	187	303	173	286	153	111	180	79	160	365	129	219	201	276	77	192	175	110
555	chr1	39343282	39345020	105	173	87	93	64	69	95	42	56	16	28	25	16	16	13	168	229	57	57	153	51	61	88	32	81	64	58	69	82	127	209	88	156	193	141	82	84	110	84
556	chr1	39453069	39454412	41	76	148	112	99	96	118	134	86	205	230	204	93	112	125	113	215	286	55	120	83	138	101	189	260	35	67	61	26	78	118	72	55	69	132	21	80	55	81
557	chr1	39506608	39506958	9	1	6	7	6	6	14	12	11	8	13	13	5	8	3	9	17	12	4	8	6	15	37	18	49	2	1	4	6	2	17	4	5	10	12	1	6	4	3
558	chr1	39646825	39647664	19	47	27	13	7	6	9	5	8	5	22	11	6	3	4	30	48	14	11	28	11	28	9	9	8	14	21	19	12	30	33	12	15	10	12	7	19	9	15
559	chr1	39797005	39798130	58	146	102	80	54	52	74	36	28	79	96	102	50	33	55	88	151	81	73	104	42	104	128	65	140	69	46	68	58	127	69	48	70	83	82	38	118	114	50
560	chr1	39798439	39799021	6	3	15	21	7	11	25	13	4	23	18	26	7	9	9	11	11	13	6	8	4	17	12	14	37	5	8	10	5	16	11	4	2	0	20	2	11	11	4
561	chr1	39812104	39815301	196	527	329	175	143	116	190	148	147	202	286	209	97	91	117	446	654	285	327	306	166	450	401	191	383	218	177	245	253	345	381	167	394	323	256	224	321	364	175
562	chr1	39976773	39977702	128	261	148	119	86	95	109	77	105	89	114	134	73	73	61	245	320	153	143	236	118	209	204	122	220	151	118	172	133	175	312	133	187	220	251	95	195	194	124
563	chr1	40026892	40027809	70	145	50	38	28	19	25	17	23	8	7	7	9	1	3	106	174	61	110	143	31	127	83	55	97	92	43	102	54	106	125	27	72	87	55	21	35	53	36
564	chr1	40037285	40037892	38	131	62	32	25	26	36	21	21	61	87	86	35	41	45	104	160	73	54	97	47	171	193	51	234	70	40	60	34	55	81	33	76	92	174	42	112	116	40
565	chr1	40121459	40122045	84	198	82	71	66	51	64	56	55	60	89	85	51	35	46	162	202	84	84	165	45	132	82	56	53	83	57	106	68	116	279	71	120	94	144	67	111	78	61
566	chr1	40139854	40140601	40	108	26	9	10	6	10	15	14	10	14	17	11	11	11	94	100	44	33	71	23	55	57	12	40	18	33	68	28	40	44	12	61	45	49	16	41	38	9
567	chr1	40193024	40194555	158	331	165	127	97	71	103	66	74	84	101	116	55	49	74	258	342	153	178	254	106	199	233	114	223	154	106	170	82	169	282	89	170	133	174	86	217	216	109
568	chr1	40198085	40199373	64	106	79	56	60	64	76	44	44	60	73	75	41	35	38	36	71	59	31	92	34	86	86	83	130	103	56	116	27	58	97	24	30	46	70	52	74	87	59
569	chr1	40273532	40273779	1	1	2	3	1	0	3	3	2	18	14	19	5	5	7	2	0	2	0	1	4	1	0	4	9	1	3	3	0	0	0	2	3	0	2	1	0	1	0
570	chr1	40277017	40280211	446	975	778	681	430	475	647	354	314	589	723	673	356	352	405	784	1164	717	497	701	489	979	709	524	842	625	453	547	396	717	1031	367	830	628	984	374	779	741	523
571	chr1	40311048	40312581	12	25	43	35	37	54	54	40	22	83	109	98	44	53	53	27	42	75	10	15	14	24	12	68	88	6	17	17	9	22	47	17	12	6	48	5	13	29	22
572	chr1	40335125	40335943	86	199	81	76	49	36	50	49	39	51	77	73	42	29	26	145	232	60	82	152	67	162	135	55	106	99	52	98	83	135	228	64	129	124	97	75	119	95	78
573	chr1	40399238	40400222	177	388	198	144	84	78	112	137	165	152	230	167	94	101	93	321	447	201	163	323	123	291	278	135	256	180	157	186	193	289	496	159	296	299	299	162	293	220	158
574	chr1	40495487	40496832	127	276	191	149	95	107	135	97	96	153	227	174	101	104	112	221	371	196	154	246	113	290	235	149	273	153	159	155	137	228	384	133	263	261	337	111	189	195	162
575	chr1	40550598	40551640	28	81	56	45	24	36	39	41	32	53	85	67	32	33	30	59	99	50	45	62	25	75	89	36	107	30	25	33	29	53	80	33	60	40	75	31	79	54	29
576	chr1	40611637	40613344	174	271	177	130	93	100	113	182	171	161	235	202	92	106	111	265	442	192	208	298	125	245	297	172	425	125	88	153	114	177	276	130	217	166	215	84	222	259	123
577	chr1	40619181	40625071	49	89	186	205	224	353	468	352	188	231	244	264	163	162	187	176	320	432	127	79	146	102	136	324	835	74	67	98	39	99	150	107	163	122	258	34	110	210	113
578	chr1	40632427	40633541	5	4	27	17	21	20	45	38	23	33	17	28	15	8	27	37	58	63	19	10	17	16	23	69	135	10	8	6	3	6	13	9	13	9	20	3	7	28	14
579	chr1	40687997	40689612	139	276	162	203	110	92	134	97	88	118	132	135	60	60	85	359	580	188	180	218	88	248	299	96	304	151	98	146	128	206	333	89	235	214	223	125	213	196	122
580	chr1	40715207	40716167	106	216	113	63	38	31	51	39	52	50	84	77	26	24	26	180	260	79	152	171	81	181	112	56	119	116	89	135	112	156	178	63	178	153	114	89	129	97	98
581	chr1	40746650	40747351	99	253	100	102	77	65	72	72	65	107	135	117	69	57	55	223	329	149	118	188	86	150	146	83	107	109	95	124	89	169	268	79	138	173	216	92	172	136	107
582	chr1	40769277	40770301	75	198	126	141	79	87	129	67	67	184	228	179	102	100	121	135	228	177	77	219	80	127	96	99	117	104	89	86	88	115	268	87	95	91	225	54	130	132	82
583	chr1	40903741	40904250	25	28	21	20	17	10	12	6	2	6	5	10	6	5	5	7	19	8	9	24	17	10	6	5	12	25	20	27	19	16	56	22	25	27	32	15	10	12	15
584	chr1	40929417	40931335	336	579	417	207	124	130	130	203	196	224	330	271	126	142	127	500	709	275	346	507	227	458	448	205	476	363	266	323	286	474	691	194	557	448	400	233	489	454	281
585	chr1	40946875	40948375	25	24	68	57	60	66	72	66	43	194	233	191	91	119	106	37	83	182	36	38	69	45	31	119	143	22	50	57	14	27	105	62	60	68	140	18	36	38	62
586	chr1	41217242	41219536	220	496	281	177	125	91	133	129	123	103	228	187	103	79	108	380	532	222	317	494	194	422	301	123	299	249	229	256	257	430	507	189	559	287	403	185	334	297	215
587	chr1	41255362	41256995	25	54	40	29	19	10	20	18	16	24	36	31	8	18	26	38	59	39	27	50	15	70	23	15	30	42	14	28	11	32	48	13	31	11	33	20	67	77	27
588	chr1	41257557	41263880	33	119	137	220	107	107	129	80	62	188	241	253	81	82	99	85	143	113	70	128	57	192	78	127	119	83	78	77	79	145	221	75	108	26	175	72	161	166	78
589	chr1	41264285	41265084	6	13	15	20	15	13	20	25	12	37	39	34	12	7	20	13	17	26	10	14	11	24	16	23	39	11	6	15	4	14	20	3	6	3	19	4	12	9	8
590	chr1	41479135	41481547	162	332	166	116	90	59	88	52	75	69	104	75	41	28	43	329	409	132	274	281	110	248	237	87	187	131	142	150	154	273	319	107	270	221	180	133	201	174	124
591	chr1	41604295	41604970	13	18	13	23	20	14	17	6	7	4	7	6	4	5	3	21	22	1	18	38	22	5	9	4	2	20	7	13	1	7	37	2	20	29	11	14	10	13	13
592	chr1	41725428	41726174	6	1	10	26	18	30	30	6	7	11	11	21	9	7	10	15	23	19	3	2	3	12	19	12	21	8	9	8	0	5	20	3	13	3	19	5	29	38	15
593	chr1	41734465	41734844	8	17	7	5	2	1	3	2	1	6	15	5	7	4	4	26	32	7	24	25	7	8	14	1	2	6	2	4	3	9	11	6	3	9	6	9	16	21	11
594	chr1	41899803	41901718	63	162	67	44	37	22	32	28	49	25	63	50	14	16	26	149	190	57	116	108	51	106	135	54	112	50	50	104	67	94	130	42	70	122	86	59	67	124	65
595	chr1	41965032	41966149	47	51	64	48	31	34	42	29	20	49	66	54	35	28	50	87	133	68	31	35	23	53	56	42	88	49	27	61	38	52	68	43	75	38	107	41	76	88	44
596	chr1	41976842	41978708	60	76	94	85	81	83	120	49	37	81	124	118	56	78	80	116	149	88	45	55	45	62	65	75	134	85	46	77	52	80	151	46	106	100	115	79	120	184	84
597	chr1	41989416	41991412	40	62	69	73	48	69	58	66	31	128	155	164	87	126	106	86	138	107	61	32	38	58	53	102	153	67	49	62	18	36	82	35	60	35	93	40	90	125	49
598	chr1	42041060	42041846	15	11	28	32	19	19	35	12	10	32	43	39	28	14	38	34	40	55	8	21	13	13	11	29	38	13	11	19	10	15	31	14	11	20	36	18	23	18	16
599	chr1	42044775	42045459	9	22	14	33	13	14	15	11	9	3	21	15	9	12	12	54	68	33	7	15	2	17	32	22	30	23	6	22	11	12	22	11	12	16	18	12	25	23	14
600	chr1	42129630	42130195	22	31	42	26	18	14	34	25	17	57	64	71	23	27	28	36	40	43	21	18	35	42	41	37	77	28	20	34	17	36	62	25	56	48	79	28	36	38	32
601	chr1	42156157	42156643	8	16	6	7	6	2	1	6	10	4	5	12	1	1	5	20	15	2	1	4	6	4	3	2	5	26	3	11	31	35	20	9	28	9	14	19	15	16	5
602	chr1	42157963	42158782	26	45	42	86	53	52	84	47	44	89	127	115	43	47	55	18	13	13	5	15	11	20	8	18	25	126	53	92	50	71	111	53	86	26	76	66	91	103	69
603	chr1	42273492	42274723	41	144	42	53	41	37	50	18	36	33	58	42	27	26	22	128	179	68	37	91	23	81	38	33	27	40	46	59	74	109	193	71	53	102	108	53	51	56	63
604	chr1	42572512	42574475	225	495	235	154	121	86	142	127	123	134	215	177	92	87	80	397	564	208	230	424	155	322	304	126	291	248	136	246	220	366	486	154	275	329	298	154	304	282	186
605	chr1	42618785	42619431	11	42	2	0	2	0	4	4	10	1	3	3	1	0	0	16	32	9	31	29	3	16	9	5	6	5	7	13	23	81	29	8	6	16	11	3	4	3	4
606	chr1	42693967	42695855	222	531	302	180	150	142	186	200	196	208	330	260	143	153	166	413	619	312	296	426	176	456	408	216	489	266	205	263	249	408	629	190	436	337	411	234	443	391	235
607	chr1	42700510	42701806	17	38	30	30	34	33	34	35	17	55	98	76	38	52	57	33	35	47	24	36	21	36	42	37	47	19	15	30	16	31	51	25	24	22	85	18	26	14	21
608	chr1	42895948	42897403	174	318	240	190	137	134	182	128	117	216	309	222	142	155	161	180	358	252	154	317	164	292	222	186	271	194	139	197	175	273	522	170	215	211	364	119	258	169	149
609	chr1	42919129	42922037	215	402	295	206	156	135	188	147	145	212	310	231	122	146	130	382	570	254	315	395	193	384	319	191	361	224	200	228	198	410	560	192	399	322	364	190	349	321	224
610	chr1	42941600	42943244	9	23	46	70	23	61	77	44	21	72	64	85	24	33	36	19	40	54	28	22	23	43	26	57	83	20	26	21	16	19	38	21	27	14	71	13	14	33	33
611	chr1	42943456	42943926	0	1	10	9	10	14	14	8	0	27	29	16	11	12	22	4	4	17	3	2	7	9	1	14	10	5	10	6	2	3	0	6	4	0	12	3	4	3	10
612	chr1	43004631	43006135	267	662	297	244	168	147	189	144	186	152	312	200	125	125	112	417	667	267	296	627	174	457	444	181	344	285	236	292	279	493	945	256	383	395	408	206	391	330	233
613	chr1	43054914	43055953	98	200	107	69	49	58	61	43	48	60	105	91	40	45	32	150	222	95	97	153	58	150	144	62	114	102	54	85	112	152	251	69	181	146	131	88	141	110	87
614	chr1	43084215	43085813	98	186	131	98	82	51	88	90	67	94	198	130	85	62	78	127	237	130	154	226	57	169	179	114	163	109	113	109	85	146	302	95	134	104	218	97	129	130	89
615	chr1	43162102	43164330	127	302	235	181	98	99	158	141	132	192	261	216	102	115	131	265	369	189	176	304	125	400	348	168	301	169	122	148	170	258	476	152	241	236	280	151	251	204	158
616	chr1	43169310	43171110	43	59	61	76	50	68	61	51	28	85	91	83	41	45	61	49	69	106	42	69	49	88	56	67	123	72	75	88	44	67	158	31	69	64	132	79	72	86	63
617	chr1	43190631	43191437	9	13	27	22	17	10	26	18	19	20	34	22	16	18	17	37	33	44	19	18	11	34	23	13	55	15	5	5	4	21	31	11	43	29	32	11	37	26	17
618	chr1	43196000	43197594	193	403	221	180	105	87	126	184	242	109	195	144	80	69	69	437	551	215	255	491	105	364	317	123	263	176	129	147	214	308	561	165	359	241	260	137	262	228	152
619	chr1	43410170	43410720	75	138	93	81	49	54	73	52	45	61	105	81	44	52	37	104	169	97	57	148	51	106	87	52	103	77	62	69	63	108	176	61	81	73	123	48	79	94	67
620	chr1	43437290	43437848	15	15	31	49	32	42	49	34	19	28	32	16	23	13	32	29	68	46	11	10	14	20	19	36	72	10	9	14	5	13	26	9	43	12	45	9	26	28	17
621	chr1	43587075	43588386	60	137	64	4	1	2	5	29	27	65	103	85	39	42	30	4	4	7	4	11	6	95	98	50	104	31	22	48	11	30	60	13	7	2	12	14	107	92	54
622	chr1	43596224	43597766	104	362	186	184	113	105	132	62	59	127	184	148	77	67	73	188	307	174	127	363	106	288	159	149	139	190	128	199	160	227	416	156	264	166	310	115	219	153	189
623	chr1	43598785	43602793	40	105	150	194	145	106	145	114	56	191	256	231	104	155	127	71	147	151	48	117	88	155	47	145	104	59	91	95	46	132	141	72	91	31	228	56	98	91	106
624	chr1	43605173	43607391	285	609	324	240	165	108	183	127	145	174	268	242	98	113	129	430	639	264	312	541	202	543	365	183	378	260	220	327	301	449	679	240	438	438	409	233	355	292	269
625	chr1	43627493	43628670	151	353	172	108	95	83	98	106	105	126	197	151	71	57	85	312	474	135	211	288	115	243	208	86	238	156	110	165	159	259	322	141	209	251	221	142	238	235	114
626	chr1	43691539	43693283	61	138	82	67	44	51	82	70	54	105	135	119	71	70	53	116	175	148	65	91	73	84	98	71	111	85	69	79	47	114	151	49	81	95	160	51	85	63	52
627	chr1	43887717	43889672	448	925	514	334	232	225	279	301	318	399	538	429	224	197	215	864	1313	484	538	652	288	705	808	322	820	556	334	494	375	663	855	343	769	843	585	398	705	691	364
628	chr1	43943298	43946509	220	628	280	299	161	115	205	149	181	222	372	281	138	149	145	405	528	246	288	612	214	474	329	189	290	276	210	279	265	480	603	193	427	267	437	175	385	286	261
629	chr1	44184481	44185514	189	406	162	148	106	71	99	72	106	66	130	103	50	42	66	283	417	151	182	370	109	309	273	100	209	178	138	202	161	284	498	133	230	293	211	107	225	168	166
630	chr1	44212299	44214195	182	335	166	174	93	73	97	84	110	123	161	122	79	86	94	266	351	167	161	355	99	261	237	121	199	139	124	202	152	259	422	158	211	219	295	126	218	180	146
631	chr1	44216659	44218417	50	137	53	51	43	35	27	31	45	32	52	51	23	19	28	102	137	57	73	112	26	88	71	55	61	45	50	68	67	110	129	33	71	50	96	32	64	53	50
632	chr1	44229335	44230596	39	82	49	40	40	32	52	19	30	26	58	44	19	22	22	66	119	46	49	86	33	57	50	23	46	43	21	61	27	47	84	39	48	39	57	33	42	60	27
633	chr1	44267873	44269838	85	207	87	88	64	47	74	47	50	46	92	65	36	33	19	223	334	90	159	232	50	132	174	56	117	69	57	91	60	102	199	55	78	106	83	47	90	82	73
634	chr1	44450999	44452182	82	133	132	69	55	51	94	63	60	118	143	123	74	64	76	146	222	124	89	112	70	129	115	86	135	80	55	84	59	94	154	65	144	138	179	46	103	97	65
635	chr1	44593215	44593805	32	80	33	24	26	12	26	14	17	17	34	28	10	7	10	66	99	40	40	78	18	65	45	17	49	26	28	40	35	65	102	19	44	45	35	32	46	53	24
636	chr1	44869419	44870955	250	492	323	205	145	132	177	144	177	148	265	194	108	83	114	491	658	280	374	382	189	481	432	195	368	248	181	236	266	387	452	174	518	373	317	222	386	325	175
637	chr1	44910409	44911111	5	13	26	27	23	27	32	23	8	55	78	66	29	39	37	20	25	27	4	12	24	18	17	40	40	5	10	4	3	19	25	16	29	16	50	10	34	24	33
638	chr1	44911911	44913264	97	149	114	63	50	39	87	72	84	153	175	159	83	87	73	155	253	111	147	179	68	194	164	111	175	67	66	90	72	107	253	80	109	162	165	97	144	100	76
639	chr1	44959170	44960695	916	1318	2920	3631	2566	3316	4849	2718	1646	4335	4595	4197	1509	2007	2119	1559	2872	4093	982	1501	2417	1896	1264	3452	4613	1227	1450	2013	821	1971	1550	1782	3130	1469	3141	955	1735	1833	1597
640	chr1	44961433	44962213	11	12	27	17	17	16	17	18	4	76	100	75	32	39	31	12	16	20	4	9	18	20	16	29	43	11	17	16	13	12	26	9	26	9	40	9	15	13	17
641	chr1	44968383	44969883	303	590	1412	1999	1486	1796	2737	1190	666	3256	3456	2972	1037	1366	1523	717	1184	1927	610	793	1403	1202	532	2132	2614	652	727	767	518	1038	870	930	1354	467	1218	399	758	809	671
642	chr1	44977348	44978712	181	329	265	223	172	177	226	196	139	303	394	320	162	191	232	245	386	313	168	417	189	282	236	235	279	216	162	237	191	278	574	208	238	218	494	162	262	221	204
643	chr1	45013220	45015389	393	735	498	367	285	261	335	323	294	350	515	422	235	222	247	643	1012	491	503	649	291	623	631	344	686	441	292	444	354	531	949	306	607	561	648	329	661	594	334
644	chr1	45016997	45017577	3	7	26	19	16	17	34	24	13	32	45	28	21	30	26	11	6	31	10	10	24	16	10	23	43	5	8	8	8	15	21	5	7	7	30	10	8	18	6
645	chr1	45018241	45020154	19	52	109	108	84	85	108	95	48	179	182	166	68	77	95	42	83	135	34	58	68	98	49	117	129	44	42	45	28	77	87	57	56	33	129	31	48	72	47
646	chr1	45022196	45023304	60	85	52	24	19	18	26	28	37	65	78	68	33	36	25	106	180	43	76	44	26	64	74	45	76	46	15	45	36	68	62	22	86	94	84	27	53	66	32
647	chr1	45024420	45024985	28	63	25	18	10	13	20	20	27	18	36	35	13	15	13	31	49	26	65	45	24	60	50	30	49	36	22	27	34	32	52	13	43	35	50	27	54	45	21
648	chr1	45037918	45039246	321	598	327	270	176	114	175	151	200	198	341	254	144	142	156	615	777	314	413	669	183	440	380	167	303	237	235	347	324	472	948	287	322	430	416	263	384	328	271
649	chr1	45045185	45049124	141	240	221	188	128	139	187	187	169	325	400	412	229	253	264	272	348	252	197	263	117	253	312	191	525	197	127	238	115	205	374	148	223	195	331	140	367	457	180
650	chr1	45051838	45052430	93	188	111	68	74	45	65	30	44	40	93	59	39	27	31	152	213	95	108	182	69	156	102	54	127	99	71	100	96	130	204	73	128	132	155	63	81	74	73
651	chr1	45057378	45058813	522	1116	2044	2201	1681	1907	2808	1366	892	3162	3538	3118	1273	1654	1766	985	1747	2221	435	1127	1498	1327	743	2008	2653	666	918	1081	877	1304	1402	1315	2185	1151	2501	619	1479	1395	1115
652	chr1	45224541	45225231	117	270	136	112	77	58	78	72	56	77	135	101	61	57	68	215	285	131	131	273	86	225	155	92	117	107	95	139	130	220	339	119	149	177	164	103	168	171	122
653	chr1	45249124	45249756	46	125	58	24	15	17	25	27	26	29	52	44	22	16	15	70	125	49	46	70	33	103	82	22	80	61	42	48	51	93	146	47	89	77	66	43	86	55	30
654	chr1	45250180	45250745	47	74	72	35	34	30	53	76	56	87	110	114	61	56	52	67	121	70	50	75	43	82	97	64	113	74	52	74	39	84	119	51	79	99	117	47	84	77	41
655	chr1	45541594	45543562	148	315	229	178	135	103	147	120	134	163	247	260	111	96	109	301	503	207	171	298	125	292	243	148	234	190	129	153	153	232	410	170	238	248	328	135	274	243	162
656	chr1	45564833	45566628	113	324	149	124	74	77	97	98	108	107	160	140	42	42	55	305	445	197	166	194	68	234	147	99	129	163	68	84	88	135	150	65	252	128	206	73	268	182	135
657	chr1	45577655	45579470	209	554	324	243	173	183	235	185	168	197	323	247	139	139	154	375	615	293	244	439	211	436	399	205	387	298	186	270	255	421	581	222	482	341	464	259	381	372	259
658	chr1	45582794	45584112	17	37	40	47	31	26	35	41	18	71	71	68	26	40	41	26	47	28	23	47	15	48	38	25	72	14	20	25	12	29	46	17	34	12	54	18	66	66	29
659	chr1	45584244	45585301	10	20	25	34	15	31	29	23	17	50	64	62	32	40	48	11	22	34	8	15	10	26	13	31	46	10	15	15	10	33	32	21	14	6	61	12	24	42	14
660	chr1	45729134	45729594	109	199	96	30	26	27	23	54	49	57	77	71	44	28	34	117	239	75	98	142	48	141	148	59	143	72	40	100	62	72	156	67	98	138	96	66	114	131	89
661	chr1	45737831	45738838	68	101	109	77	77	63	63	57	38	89	139	116	75	71	67	92	182	125	48	152	56	125	103	82	135	51	72	73	54	78	177	65	53	57	149	42	61	61	65
662	chr1	45745949	45747714	31	66	77	84	47	48	76	91	41	137	153	182	80	100	79	62	110	96	35	68	47	66	49	87	123	46	36	44	28	45	68	26	46	29	109	23	52	92	44
663	chr1	45748233	45749262	5	9	26	26	15	28	46	22	16	52	75	82	29	31	33	23	21	30	11	14	6	16	13	35	38	12	12	7	4	14	22	9	12	6	38	10	13	13	18
664	chr1	45759378	45760864	611	1331	682	536	372	411	507	621	558	539	727	694	340	365	367	1015	1676	816	574	1068	534	942	928	563	1052	800	495	767	605	850	1466	546	978	904	1058	539	1257	1088	557
665	chr1	45782025	45782355	6	13	21	18	11	17	32	10	10	24	30	25	16	14	13	15	29	21	6	12	8	7	15	28	29	8	5	9	2	4	16	8	14	7	35	4	6	10	7
666	chr1	45788612	45789703	195	360	293	258	190	221	267	183	157	289	373	344	203	217	243	248	427	277	196	405	166	315	312	211	369	207	165	242	167	297	596	206	254	289	457	162	318	313	213
667	chr1	45821409	45823279	206	420	340	255	188	188	314	281	220	287	356	321	125	148	190	383	624	376	249	368	227	392	395	258	451	312	190	288	220	336	527	212	482	364	436	214	490	441	241
668	chr1	45857524	45858754	7	18	52	46	23	38	47	37	24	71	64	93	28	30	34	22	42	38	24	29	34	36	16	46	50	18	23	20	16	24	42	20	25	18	54	14	42	49	34
669	chr1	45924309	45927119	372	608	645	519	397	462	605	615	470	728	966	731	447	452	512	600	1005	711	430	725	442	614	660	552	952	433	418	514	354	518	1068	393	605	558	920	360	683	666	417
670	chr1	45933290	45933449	3	3	7	3	6	7	6	1	1	11	12	14	9	7	10	1	3	3	1	5	2	2	2	7	6	1	1	1	0	1	3	0	1	0	2	1	4	1	2
671	chr1	45988313	45989464	234	501	348	224	169	141	199	142	155	224	345	262	124	108	153	369	613	280	271	389	180	405	387	224	419	267	184	231	232	409	698	198	462	382	412	216	383	373	224
672	chr1	46041348	46042133	126	284	109	92	69	51	69	60	51	59	98	64	32	24	33	231	287	110	145	320	78	175	173	85	112	78	92	118	150	204	339	137	173	144	176	72	124	99	108
673	chr1	46272809	46276473	49	69	117	80	36	73	73	89	62	175	210	209	87	63	78	69	99	62	34	96	69	106	57	98	121	73	61	87	58	100	190	70	104	39	151	78	122	142	91
674	chr1	46369918	46372464	287	694	449	306	219	239	290	149	237	338	503	340	176	182	180	565	753	435	227	542	273	582	566	317	577	350	316	498	367	532	928	321	545	590	608	321	488	451	333
675	chr1	46404661	46405819	42	67	53	5	3	9	9	39	22	72	74	62	37	35	40	49	91	39	37	38	41	46	71	25	81	36	39	44	44	55	76	35	128	113	101	28	63	63	37
676	chr1	46436132	46437154	100	218	107	81	73	31	58	78	65	66	103	78	31	32	43	217	290	97	146	212	64	187	173	62	135	66	59	78	91	163	230	78	191	160	121	101	139	134	88
677	chr1	46485287	46487068	75	187	140	100	59	62	83	67	75	90	116	102	50	59	73	103	158	95	98	184	88	125	111	71	83	145	73	109	85	134	172	73	223	104	199	56	128	151	80
678	chr1	46512466	46515537	20	62	70	34	35	38	54	82	49	127	118	135	44	51	73	32	67	82	24	47	42	60	30	80	110	28	33	39	31	60	52	22	52	22	87	28	68	60	56
679	chr1	46539608	46542543	216	419	224	200	135	108	162	166	172	160	227	189	93	76	116	330	488	259	312	373	155	407	333	153	284	180	153	187	162	301	412	164	218	231	276	165	254	248	174
680	chr1	46569037	46570855	31	56	82	141	79	65	105	58	31	31	53	33	19	18	14	77	115	114	53	96	69	90	66	83	83	38	65	70	40	94	89	52	106	94	129	49	84	54	63
681	chr1	46571825	46572755	39	96	145	93	53	85	125	166	100	75	102	78	27	35	36	125	215	413	79	157	135	108	50	172	163	48	39	59	20	76	55	40	182	123	163	45	58	58	63
682	chr1	46578168	46579759	138	281	211	166	128	110	118	171	135	164	249	213	120	104	120	216	370	199	163	328	112	245	202	148	252	157	120	165	117	211	390	168	227	237	283	111	238	217	135
683	chr1	46632385	46632967	56	106	36	1	2	2	1	1	2	1	0	0	0	0	1	3	1	0	3	4	4	20	8	4	20	1	5	0	0	7	2	0	2	3	4	0	3	3	1
684	chr1	46842060	46843205	166	372	189	114	91	80	106	92	94	146	223	168	87	93	89	249	328	168	169	377	124	249	226	127	179	165	138	204	132	238	548	161	169	234	281	109	191	174	161
685	chr1	46853858	46855532	99	155	83	65	64	42	56	44	59	70	112	98	44	47	51	167	232	97	129	166	83	138	153	57	164	102	59	124	94	121	226	78	109	122	152	85	107	101	77
686	chr1	46906046	46907194	134	269	122	86	61	55	78	52	46	73	122	92	52	53	63	200	318	135	179	249	96	190	172	63	159	99	80	128	97	203	229	71	178	142	146	92	173	98	102
687	chr1	46956857	46957890	87	249	110	51	45	23	59	38	62	39	71	52	32	22	23	216	309	68	120	171	73	218	154	52	138	96	70	108	139	163	232	66	175	147	133	85	167	119	89
688	chr1	47417281	47417946	7	24	13	20	14	19	26	19	24	38	64	46	33	26	32	22	30	19	42	31	13	8	30	15	29	26	9	20	11	27	46	14	19	19	9	16	27	29	7
689	chr1	47551615	47553313	125	257	189	145	91	116	133	114	100	179	222	191	109	100	102	193	270	183	115	235	132	210	172	154	195	173	113	151	115	175	339	128	243	142	288	87	176	147	142
690	chr1	47571444	47573573	163	357	211	134	113	97	141	122	126	156	255	213	94	92	125	333	466	194	229	396	126	312	253	132	231	169	152	178	218	300	530	185	268	256	306	172	231	174	169
691	chr1	47674725	47676535	95	228	120	95	57	43	64	53	63	29	58	40	22	14	23	114	191	81	96	236	70	149	106	67	72	80	86	86	82	149	217	82	119	97	104	53	82	73	68
692	chr1	51197769	51199165	245	534	298	174	107	116	173	240	195	205	300	255	129	104	139	474	671	278	289	452	203	450	418	180	479	302	226	269	280	374	615	207	520	462	410	229	443	368	206
693	chr1	51206014	51208985	224	480	343	49	41	46	72	190	158	290	380	308	136	151	183	348	520	279	119	306	237	381	335	252	400	296	201	266	211	358	652	232	574	322	456	193	412	318	257
694	chr1	51214470	51217710	182	348	333	14	13	29	48	150	129	285	326	338	156	149	161	327	456	232	73	186	210	367	337	264	439	237	194	229	208	290	546	191	477	373	475	214	422	287	238
695	chr1	51473994	51475506	151	307	107	72	51	33	44	70	97	65	106	80	44	40	48	260	416	91	132	286	99	237	192	67	182	135	88	160	146	183	304	90	150	222	128	89	141	159	86
696	chr1	51535104	51535562	10	24	20	17	10	9	12	13	4	7	21	16	4	7	8	33	41	16	12	23	14	15	34	9	24	26	10	17	13	21	28	12	23	18	21	14	25	32	12
697	chr1	51755629	51757909	163	278	183	116	81	74	89	126	126	206	265	170	121	113	124	269	385	195	168	287	131	282	246	191	334	144	142	219	126	260	400	150	283	291	374	119	168	221	160
698	chr1	51855085	51855632	38	70	55	41	30	30	43	60	51	31	48	51	32	23	32	41	98	62	42	61	48	49	58	27	64	46	22	56	24	50	111	38	54	48	68	38	59	32	38
699	chr1	51966623	51968784	180	461	295	176	123	93	177	113	113	201	321	243	118	105	124	377	513	270	218	353	159	324	280	188	307	188	218	225	194	299	527	228	326	330	339	155	331	284	216
700	chr1	52022163	52023089	1	4	16	6	7	4	16	13	14	42	47	25	13	20	17	4	15	19	5	8	6	9	6	16	14	3	11	10	6	12	19	10	5	0	16	3	5	8	9
701	chr1	52027190	52032736	37	51	129	81	67	89	101	156	78	278	305	338	125	153	144	69	141	181	43	79	64	84	75	163	235	43	64	64	39	76	145	75	71	52	171	49	73	110	84
702	chr1	52116128	52118214	203	374	243	169	145	151	191	146	162	266	341	290	140	163	183	255	418	188	195	279	192	325	299	166	421	243	156	221	191	281	427	163	391	321	428	202	356	349	193
703	chr1	52270457	52272382	165	298	155	136	105	96	148	143	126	115	193	190	85	107	103	201	344	173	167	241	96	236	202	110	271	196	116	155	121	206	367	90	260	198	189	132	252	257	107
704	chr1	52293181	52295509	219	409	266	186	154	127	197	205	190	232	379	246	141	154	175	391	605	278	235	489	173	346	340	219	333	219	200	273	183	352	512	196	263	283	412	159	299	290	223
705	chr1	52380020	52381228	35	79	29	6	4	6	7	10	16	31	56	38	11	9	12	112	140	38	17	17	16	134	85	21	52	40	20	40	23	14	24	18	38	19	22	16	57	45	13
706	chr1	52586942	52587698	4	16	20	22	13	21	17	18	17	33	44	30	20	28	23	7	19	15	8	6	6	20	11	15	33	8	10	8	15	17	18	8	8	8	34	7	17	17	12
707	chr1	52603438	52605039	269	493	201	128	89	65	90	110	128	104	155	144	72	63	70	366	521	138	240	399	134	407	315	122	270	199	166	204	237	323	514	145	389	340	251	175	278	264	186
708	chr1	52641781	52643536	106	166	212	163	121	117	155	152	84	184	234	193	122	120	173	135	215	228	94	209	112	157	149	156	269	138	129	137	83	162	283	127	242	151	242	87	160	161	120
709	chr1	52790392	52792234	151	270	120	86	67	36	50	98	99	66	101	97	45	32	40	290	369	145	217	190	71	222	158	88	191	113	90	148	81	149	143	48	118	190	113	91	219	162	119
710	chr1	52840282	52841546	19	34	22	5	10	13	9	17	25	31	40	41	18	16	14	133	228	84	58	37	10	11	11	5	7	14	15	25	12	15	32	4	64	91	55	35	94	57	57
711	chr1	52870911	52871857	11	25	6	3	3	3	5	5	9	3	3	10	1	4	1	33	51	15	35	11	14	49	37	8	22	6	7	20	2	20	19	5	22	33	16	14	41	23	18
712	chr1	52936048	52937118	86	161	132	115	69	64	91	57	54	89	139	82	58	46	50	168	227	170	95	270	107	185	151	114	130	113	105	88	94	135	304	85	134	127	199	69	108	91	110
713	chr1	52941034	52941995	56	127	132	51	44	42	58	64	34	91	149	130	69	67	74	100	235	179	105	165	79	136	127	103	154	97	88	148	38	82	251	61	80	109	174	50	115	107	78
714	chr1	52964496	52965174	58	113	65	31	24	14	20	22	20	13	38	22	13	7	9	108	132	41	66	154	54	115	58	41	47	41	47	51	65	88	144	54	72	106	69	42	68	49	42
715	chr1	53080631	53082424	40	130	57	101	64	52	64	42	30	3	2	4	1	2	3	274	378	154	154	258	55	243	200	81	126	126	74	136	15	37	92	6	117	158	123	36	138	82	76
716	chr1	53159555	53160282	51	85	67	25	22	24	33	20	21	21	28	26	13	17	22	39	73	20	76	68	31	55	88	31	75	42	36	41	13	20	52	8	104	95	79	37	75	64	27
717	chr1	53165250	53165941	41	70	34	10	9	7	12	12	13	15	19	25	16	12	10	63	89	42	70	99	21	69	47	20	31	29	18	23	3	10	13	1	64	62	37	24	43	22	28
718	chr1	53252891	53253752	21	12	67	49	35	38	72	68	35	91	138	118	55	61	68	21	57	99	15	35	34	27	38	66	66	15	24	42	19	26	57	33	59	59	99	24	34	31	40
719	chr1	53434468	53436355	161	337	212	160	98	107	124	143	178	123	205	159	82	89	81	301	420	157	204	314	144	283	281	126	216	145	144	222	187	277	402	144	264	269	289	146	242	196	131
720	chr1	53457986	53459835	410	805	469	307	230	217	288	200	217	318	518	344	215	209	206	650	891	408	464	692	318	567	563	278	494	359	320	416	359	580	952	298	484	572	684	280	503	441	376
721	chr1	53476401	53477613	95	243	144	87	69	56	87	110	79	129	168	155	74	72	76	168	277	126	120	211	102	233	165	104	192	123	104	112	87	177	298	86	152	149	179	104	172	169	102
722	chr1	53563663	53567393	202	609	285	243	151	150	193	123	133	122	239	184	93	84	92	399	582	272	305	552	201	358	333	165	268	299	239	341	218	423	665	211	503	251	419	211	371	367	231
723	chr1	53606106	53606771	19	24	57	25	29	46	57	29	21	102	150	107	58	58	76	48	92	116	17	32	20	48	42	90	123	15	30	25	13	28	26	13	38	47	73	7	39	38	40
724	chr1	54075403	54077144	97	242	138	86	81	42	64	80	64	69	103	102	53	43	48	178	239	125	107	238	63	159	95	71	140	121	97	94	122	190	241	75	196	129	184	82	160	92	84
725	chr1	54127606	54128945	70	179	102	65	36	35	58	63	45	89	100	93	51	62	63	112	198	100	78	137	52	97	128	78	140	81	64	87	84	118	208	63	98	121	128	66	115	109	77
726	chr1	54183274	54185132	181	416	175	119	89	59	73	60	97	71	111	104	47	35	50	225	352	140	168	342	90	287	228	107	156	174	128	196	147	262	371	132	219	228	213	106	193	199	138
727	chr1	54290656	54292992	161	312	232	163	112	130	167	181	166	198	310	246	129	138	151	281	390	237	167	305	134	263	299	151	349	201	131	214	111	268	482	156	271	296	322	163	271	288	156
728	chr1	54437874	54439029	104	262	143	108	90	72	104	98	91	127	162	127	87	62	72	175	303	135	114	240	98	194	159	91	161	120	80	113	119	187	301	109	204	149	211	129	183	161	93
729	chr1	54644328	54646168	133	274	128	93	70	56	79	44	80	58	113	59	49	30	33	264	292	84	146	249	70	146	152	79	107	89	74	131	117	184	287	126	172	210	145	89	115	115	92
730	chr1	54726390	54726980	29	67	31	27	20	13	17	10	21	15	20	23	7	6	8	33	56	20	39	51	27	41	26	15	22	24	17	28	17	42	91	26	24	47	30	28	28	27	14
731	chr1	54953754	54954731	98	191	119	95	68	73	99	62	49	103	153	122	67	67	72	163	249	113	138	181	113	157	164	87	157	129	97	115	90	133	285	90	145	160	197	86	154	155	107
732	chr1	55001940	55003458	79	179	82	68	58	54	66	55	65	70	128	95	63	50	48	143	196	75	89	189	67	149	105	58	101	92	76	94	99	137	245	56	103	113	142	102	128	111	87
733	chr1	55039183	55040052	38	51	30	39	22	21	23	18	18	10	22	22	9	6	7	86	95	36	40	58	13	50	56	24	79	30	23	29	19	39	52	7	27	34	35	20	51	36	20
734	chr1	55086127	55087936	13	16	22	43	19	15	30	29	24	61	56	67	13	25	19	18	27	39	10	30	7	29	12	29	35	5	15	10	7	11	22	15	13	4	29	10	22	15	9
735	chr1	55124487	55126658	181	586	196	177	125	95	125	59	82	151	263	200	91	100	91	317	486	206	217	481	123	413	252	133	195	227	123	241	215	340	519	160	263	243	293	161	262	199	137
736	chr1	55452539	55454699	183	389	203	179	100	102	111	114	121	102	186	130	65	56	74	422	543	205	296	366	119	358	412	128	314	192	99	181	152	274	333	111	223	259	124	148	311	224	160
737	chr1	56568537	56570904	19	7	9	358	246	191	243	21	17	15	15	17	8	6	9	8	8	8	3	2	5	7	11	15	23	1	4	1	6	8	17	5	32	106	53	9	12	22	9
738	chr1	56715372	56716214	11	16	12	51	30	18	41	1	1	6	12	11	1	3	3	1	4	1	2	7	2	5	2	4	6	11	14	21	10	6	36	4	35	26	39	20	9	19	5
739	chr1	58783793	58785443	150	266	204	121	102	72	103	96	91	116	130	141	64	71	78	240	350	167	113	199	129	202	184	115	229	114	106	156	118	198	343	121	161	178	167	103	176	173	107
740	chr1	58811903	58812651	3	3	22	43	33	52	47	51	22	35	62	46	31	19	36	25	42	44	12	8	8	22	16	37	43	1	4	4	1	8	10	4	5	3	12	8	7	10	5
741	chr1	58937346	58938642	132	244	130	67	55	56	77	77	86	74	106	103	46	49	60	194	303	122	114	169	84	195	166	87	167	138	86	114	99	157	244	81	194	180	172	82	158	169	89
742	chr1	59019838	59024214	610	1177	652	274	225	214	300	596	551	321	510	424	212	251	273	826	1289	594	519	763	455	930	893	477	1189	681	441	716	562	989	1392	561	939	887	986	429	784	1038	433
743	chr1	59053170	59055343	134	291	217	111	78	66	85	41	61	99	145	117	69	67	59	186	279	138	157	258	128	230	168	104	183	159	142	187	150	256	376	150	238	221	313	128	216	154	148
744	chr1	59141310	59142729	127	280	199	79	45	64	82	76	58	119	171	130	81	68	75	235	363	176	154	199	129	278	207	134	286	118	121	137	183	278	337	120	243	170	226	117	208	172	132
745	chr1	59258365	59258917	11	16	40	16	18	25	39	13	3	40	50	27	14	25	17	13	9	25	13	12	25	6	10	22	39	9	26	43	17	19	45	23	25	34	72	11	26	18	29
746	chr1	59284992	59285412	4	10	15	10	7	13	11	13	12	12	18	20	12	6	22	11	18	16	12	11	9	16	28	19	43	16	14	13	4	12	17	9	29	17	33	8	20	23	10
747	chr1	59384838	59385615	46	65	36	15	15	13	17	15	19	18	26	37	14	16	17	59	90	40	47	34	26	61	84	25	76	38	30	38	40	79	89	37	102	100	84	34	80	47	26
748	chr1	59534417	59535891	135	303	220	127	109	95	101	115	116	153	227	164	91	110	101	239	337	145	145	257	159	230	247	114	221	152	138	202	162	277	466	150	253	213	327	138	223	188	157
749	chr1	60052356	60053802	87	151	135	58	56	32	51	22	31	19	31	24	7	5	14	0	3	4	31	76	68	14	5	17	24	98	77	141	103	170	273	87	142	150	157	58	13	34	29
750	chr1	61962829	61964136	255	508	296	203	166	156	225	198	206	276	368	311	174	134	157	390	572	287	254	335	208	396	448	188	489	304	206	305	215	353	541	178	505	454	423	209	470	427	211
751	chr1	61979941	61981605	72	146	101	38	19	25	24	25	28	19	37	27	16	14	20	74	116	45	74	112	33	59	67	35	46	71	82	122	75	116	192	81	120	112	117	76	67	58	76
752	chr1	62673563	62676060	248	672	365	270	152	172	211	190	157	249	372	286	138	147	150	465	661	259	269	510	230	461	371	207	378	345	234	280	295	480	680	213	587	413	490	270	486	427	244
753	chr1	62925713	62927075	84	137	83	49	24	21	35	39	41	50	62	47	25	17	18	131	185	37	83	100	46	92	92	31	67	59	40	46	68	123	165	48	161	115	93	58	60	45	38
754	chr1	63021778	63023143	89	207	169	119	78	90	126	75	71	161	204	169	91	93	98	152	275	144	85	167	82	184	143	109	237	120	107	127	98	166	266	97	196	167	209	94	173	164	101
755	chr1	63605382	63606627	170	351	177	134	85	55	97	49	75	71	135	110	47	55	55	248	310	115	175	376	120	257	209	89	158	166	139	142	156	310	455	138	261	255	223	118	200	155	127
756	chr1	63760856	63762302	78	111	117	77	59	82	89	120	80	137	205	155	87	90	100	112	182	141	71	130	101	96	100	102	174	65	69	99	79	115	201	87	159	132	209	41	130	104	83
757	chr1	63831011	63832945	125	239	133	132	77	54	96	128	128	117	177	144	73	69	68	310	389	144	161	275	101	213	210	110	187	154	107	142	122	243	364	135	219	207	172	117	177	167	131
758	chr1	65204011	65205235	124	258	98	48	39	13	35	54	80	35	83	55	26	25	24	212	256	62	159	221	60	214	147	58	175	74	64	99	94	145	198	59	182	175	95	61	124	103	73
759	chr1	65385551	65387674	57	169	65	8	7	18	20	41	49	48	63	52	29	25	26	175	274	69	130	87	13	61	68	18	27	16	19	24	21	91	45	11	33	60	27	20	50	38	27
760	chr1	65503916	65504457	7	26	19	1	0	0	3	10	4	17	21	12	6	8	10	21	23	7	55	42	11	2	1	1	1	18	8	7	7	12	35	4	16	30	10	3	25	21	14
761	chr1	65654006	65654381	1	2	0	1	2	4	2	5	2	2	3	2	1	2	3	4	11	3	2	1	2	3	2	0	2	1	0	1	11	34	38	20	4	1	1	2	3	1	0
762	chr1	65657887	65660101	104	183	104	56	47	66	67	74	83	61	109	94	41	44	52	114	206	114	113	235	88	138	105	67	137	111	94	137	91	172	292	102	163	200	178	81	176	141	89
763	chr1	66509585	66510643	14	7	25	28	16	32	62	16	14	83	65	92	58	72	93	6	13	8	6	13	29	9	5	16	28	8	5	13	3	2	20	7	11	6	34	4	40	50	27
764	chr1	66519991	66521467	10	14	78	56	29	54	66	25	12	86	81	85	83	70	73	12	13	68	4	10	47	13	4	60	79	17	36	39	11	25	65	34	40	44	114	11	13	38	47
765	chr1	66521661	66522518	5	7	32	21	24	22	39	8	7	44	37	28	37	30	35	3	10	38	4	4	24	8	2	19	31	12	18	11	7	12	28	14	19	13	63	3	10	16	15
766	chr1	66568689	66576519	283	267	623	500	322	612	776	263	128	704	685	682	415	448	548	214	391	528	132	179	383	169	169	364	622	259	291	422	172	393	778	407	456	408	1043	212	390	571	346
767	chr1	66578156	66578626	5	9	19	39	12	22	42	7	3	23	20	25	15	23	17	5	5	14	3	3	9	4	0	18	16	8	8	9	6	1	13	13	8	7	35	2	8	12	14
768	chr1	66638313	66641281	57	48	141	122	83	104	150	58	30	162	160	157	122	117	136	44	48	82	31	39	106	24	17	51	92	69	69	90	67	103	231	108	152	144	370	61	38	80	75
769	chr1	67162795	67164511	154	326	198	134	89	76	109	83	87	137	221	160	79	93	86	259	383	167	192	304	112	280	239	117	245	169	139	172	140	275	454	127	248	201	274	119	215	206	153
770	chr1	67167871	67169673	126	266	125	57	54	46	67	68	90	90	140	109	56	42	56	242	320	106	154	198	85	213	200	100	200	119	93	135	127	192	274	93	221	184	178	128	199	222	112
771	chr1	67291412	67292924	128	332	166	94	61	58	68	100	89	74	138	112	60	46	54	279	351	116	184	249	106	278	255	96	228	125	87	113	151	221	296	85	230	197	167	130	194	192	111
772	chr1	67638870	67640726	6	14	25	38	19	21	37	35	19	89	81	85	33	40	26	13	22	34	19	23	18	41	33	58	38	12	22	17	9	31	40	24	15	5	48	9	9	16	28
773	chr1	67642415	67642871	2	6	9	8	9	5	4	8	7	20	18	23	11	14	5	3	3	14	2	8	7	7	5	12	8	3	4	5	7	12	8	3	2	0	10	1	5	5	5
774	chr1	67642971	67645039	10	25	36	23	32	33	39	25	15	91	108	81	30	37	30	13	13	45	12	11	16	37	7	72	71	18	11	11	9	26	38	22	9	3	63	6	10	23	24
775	chr1	67645877	67649320	14	38	70	65	57	93	143	51	29	135	125	138	54	59	59	34	41	93	23	22	42	74	23	107	111	22	41	28	19	47	54	42	29	15	85	12	36	56	37
776	chr1	67667044	67670506	189	339	269	205	157	161	237	211	167	236	312	262	128	149	139	276	503	248	249	278	175	317	378	213	482	258	175	223	177	300	403	140	348	222	359	160	317	336	200
777	chr1	67923118	67926099	430	1057	434	390	225	233	352	266	319	294	436	409	218	189	271	865	1228	434	371	827	285	678	576	342	635	605	307	520	565	988	1512	455	531	880	545	507	746	695	395
778	chr1	67926875	67928489	5	13	22	45	35	48	80	29	18	72	83	81	62	68	57	5	19	35	5	9	18	18	21	29	57	20	11	11	4	37	76	28	17	24	41	17	22	33	20
779	chr1	67974261	67975300	36	97	56	29	17	29	41	53	51	96	107	93	64	61	52	82	127	84	36	72	41	102	103	70	149	75	30	50	41	89	108	51	77	111	78	40	123	73	49
780	chr1	68734255	68735820	56	175	86	86	45	33	50	39	40	54	69	84	38	41	35	107	138	83	87	168	54	134	54	54	56	78	49	74	69	127	176	58	113	87	141	68	81	59	82
781	chr1	70443546	70444525	93	155	146	76	72	73	91	90	65	128	188	156	108	80	103	122	219	160	101	203	90	161	130	100	179	109	101	122	96	147	274	121	170	164	201	80	184	129	102
782	chr1	70459311	70460588	135	240	179	118	90	77	101	85	85	116	190	158	75	62	84	243	319	132	167	230	98	212	178	107	224	139	108	117	141	199	256	111	254	188	203	111	170	173	120
783	chr1	70491390	70492422	11	8	17	17	15	21	19	23	7	52	48	45	14	21	30	16	23	22	8	6	13	12	12	18	26	13	9	4	6	15	30	16	14	1	26	7	10	20	14
784	chr1	70591671	70593772	211	431	294	204	154	120	188	168	148	237	364	281	161	164	153	397	598	298	239	339	180	363	376	186	441	258	146	249	204	317	574	193	408	345	390	213	415	361	191
785	chr1	70648661	70649961	185	357	195	131	101	96	129	232	172	205	320	293	175	199	180	430	578	297	201	384	119	279	337	214	429	135	89	161	148	195	505	165	190	266	295	133	318	293	151
786	chr1	71291197	71294359	30	45	56	64	43	71	77	66	38	95	133	147	52	60	60	69	88	72	32	43	40	74	44	98	102	38	20	54	23	58	92	21	38	9	63	19	71	128	49
787	chr1	71318505	71320444	97	151	191	114	97	135	164	159	99	226	283	267	146	121	143	173	352	225	101	161	112	182	181	152	334	133	116	133	99	166	255	130	224	222	279	94	175	211	123
788	chr1	74435993	74437063	87	181	152	104	84	68	93	82	56	165	238	176	101	72	101	121	204	152	88	197	88	178	135	126	196	101	88	101	87	133	347	93	128	160	240	68	143	119	107
789	chr1	74969744	74972355	120	162	170	155	168	176	190	130	88	228	279	220	140	157	190	141	265	174	107	167	114	156	181	137	332	128	103	144	106	152	338	128	225	165	326	106	189	253	116
790	chr1	75961383	75965471	250	584	336	204	187	171	235	204	212	306	447	359	202	162	182	500	714	324	356	506	207	489	440	297	489	325	256	353	285	491	713	232	436	449	484	224	398	337	277
791	chr1	76022628	76038530	300	633	1045	1009	754	805	1254	906	510	1782	1967	1826	872	981	1008	555	1050	1334	443	765	742	952	782	1370	1607	434	491	532	351	626	1186	483	807	587	1726	338	712	801	672
792	chr1	77457262	77458274	70	196	116	96	56	47	95	75	59	93	138	107	65	52	47	140	229	151	80	186	67	180	151	105	171	102	69	109	73	136	242	95	133	114	167	77	144	130	94
793	chr1	77919901	77922461	213	504	336	200	141	134	176	192	158	241	333	274	181	124	167	439	609	293	285	356	219	402	420	217	431	262	205	253	250	387	497	213	387	344	371	173	323	289	245
794	chr1	77997372	77998535	53	164	91	48	39	30	34	35	42	87	112	75	39	35	40	126	198	78	66	126	57	136	102	54	101	69	59	80	70	118	213	64	105	122	112	75	85	88	64
795	chr1	78017699	78018550	32	96	56	41	24	26	32	39	35	39	57	51	19	24	27	74	94	54	42	92	35	80	46	34	73	52	34	65	25	50	122	28	54	54	68	27	63	54	38
796	chr1	78177006	78178483	7	15	29	38	14	24	48	34	14	68	60	61	25	26	26	18	29	37	13	22	15	21	12	47	50	12	13	12	10	24	32	19	8	10	42	4	23	38	17
797	chr1	78178911	78180490	3	17	35	26	26	39	56	37	13	84	74	73	32	26	28	22	34	35	11	12	18	31	16	60	80	14	19	12	5	26	36	28	13	10	53	10	10	32	22
798	chr1	78215945	78218438	207	394	439	314	234	304	399	406	282	474	618	539	290	311	345	373	661	520	260	390	261	428	473	389	804	286	262	262	194	340	601	224	583	412	647	230	463	501	281
799	chr1	78242091	78244051	160	401	622	572	572	706	1396	554	291	1033	1029	932	405	498	526	584	995	1134	227	300	536	621	303	926	1250	344	265	304	220	415	531	441	528	365	880	214	340	604	359
800	chr1	78857704	78859927	36	74	202	26	37	85	153	121	51	294	304	254	134	139	138	46	81	106	32	22	134	37	36	84	217	64	107	82	43	70	182	105	102	97	296	35	44	85	100
801	chr1	78860095	78861622	11	26	58	19	13	36	62	45	24	72	84	64	26	31	42	9	22	21	10	10	28	16	9	49	66	13	31	26	4	25	52	30	23	17	97	10	12	29	29
802	chr1	78866718	78867199	2	12	22	4	7	15	11	18	7	35	33	37	9	11	15	4	9	7	7	5	12	11	9	8	27	8	7	14	7	4	19	6	15	11	35	5	7	15	10
803	chr1	78869548	78873604	104	121	243	35	58	162	246	254	128	272	255	309	97	137	136	80	149	92	71	43	127	87	128	99	380	136	103	99	69	100	171	69	168	49	273	78	175	296	113
804	chr1	78881456	78886430	26	43	109	36	40	99	118	67	26	266	340	259	94	123	107	16	18	65	25	46	57	46	20	91	125	26	71	90	25	69	148	82	46	20	154	29	45	76	101
805	chr1	78887482	78890409	41	94	169	84	57	138	193	209	131	294	299	301	149	154	150	37	43	85	40	73	127	43	26	98	190	48	96	136	60	101	223	138	120	128	276	43	83	97	120
806	chr1	78902743	78905012	32	53	92	29	37	64	74	61	30	205	178	226	97	100	108	13	19	44	15	31	57	33	17	41	105	31	64	64	20	59	85	39	51	31	123	26	49	81	66
807	chr1	84001595	84002096	0	0	0	0	2	1	1	1	0	47	52	43	20	23	17	9	5	7	1	0	0	1	0	1	4	0	1	0	1	0	2	0	1	0	3	0	0	1	0
808	chr1	84237179	84237932	17	32	4	0	1	4	0	9	8	11	30	26	8	7	4	14	26	5	13	15	3	16	11	6	9	36	10	17	10	12	33	12	43	86	16	13	16	8	6
809	chr1	84315624	84316711	78	156	94	5	5	7	17	29	39	36	70	55	29	23	25	104	161	41	85	169	56	96	69	31	47	92	79	94	70	99	179	46	123	119	89	83	65	79	51
810	chr1	84509669	84510493	3	14	39	6	9	18	19	20	15	97	104	102	37	55	49	4	9	25	4	9	37	11	2	30	27	5	14	18	2	15	22	19	23	27	46	11	7	12	22
811	chr1	84536609	84537535	27	70	50	18	11	11	16	18	25	29	59	59	22	19	28	15	22	13	45	98	32	31	26	19	24	44	28	50	35	54	113	28	52	53	91	26	36	41	30
812	chr1	84540792	84541538	3	7	19	0	1	5	3	14	9	42	50	45	22	20	35	0	0	6	6	6	12	1	1	14	15	15	8	14	2	9	14	9	18	10	14	8	5	8	8
813	chr1	84717177	84718410	79	149	146	96	59	93	101	77	70	144	197	173	84	95	111	154	194	161	77	145	106	161	133	133	205	93	93	110	89	121	263	90	118	129	188	89	129	140	104
814	chr1	84742909	84745611	274	553	401	138	140	124	197	211	221	342	466	363	184	201	195	398	647	281	302	427	193	427	387	230	443	257	252	295	252	345	585	249	414	434	436	206	407	349	225
815	chr1	84810910	84813598	254	624	433	269	185	259	322	297	273	500	595	542	275	365	314	574	767	452	313	549	300	470	477	333	735	282	234	359	237	436	624	277	443	443	598	183	397	429	292
816	chr1	84928076	84929853	95	243	108	89	74	47	53	41	54	98	134	89	40	36	48	165	255	73	121	228	68	174	116	91	85	130	88	106	146	231	275	96	179	173	187	120	127	87	84
817	chr1	85161061	85162359	11	13	49	23	33	35	43	24	19	86	77	89	26	43	37	11	24	32	10	17	23	19	12	53	58	8	27	26	12	19	55	44	18	6	53	13	33	40	31
818	chr1	85176825	85178560	23	10	34	29	32	36	33	56	25	49	57	77	21	41	28	36	67	37	25	19	25	20	37	31	80	30	23	24	19	26	50	19	26	11	51	13	57	92	28
819	chr1	85179877	85182464	17	26	60	66	30	70	65	70	39	110	107	100	46	43	69	50	65	79	43	27	57	29	48	59	163	29	43	36	18	43	71	38	42	19	87	16	55	103	51
820	chr1	85226463	85227549	9	16	29	50	56	39	76	48	26	60	56	65	37	27	40	27	33	43	12	24	18	11	13	45	73	8	12	9	9	15	31	27	28	15	47	6	25	25	18
821	chr1	85232313	85237570	160	258	245	258	248	245	338	172	152	274	315	264	152	132	163	350	506	283	192	281	180	183	198	202	359	212	176	244	138	251	537	237	348	240	443	125	231	256	190
822	chr1	85286140	85287299	36	60	34	1	2	8	7	8	13	12	17	19	8	14	9	42	54	8	35	50	12	32	18	13	19	29	24	25	31	47	53	21	77	20	23	39	64	52	44
823	chr1	85438647	85440361	27	87	27	7	6	9	6	49	62	38	93	68	22	26	17	201	271	65	96	186	15	25	17	14	24	14	12	9	27	30	99	22	46	53	48	2	42	23	32
824	chr1	85497339	85498324	130	273	137	89	67	71	100	85	102	111	170	143	56	64	87	225	344	141	128	270	101	245	228	88	201	128	97	137	136	194	292	107	203	243	198	108	203	208	103
825	chr1	85513234	85515493	216	336	272	146	116	132	186	212	188	324	451	298	195	188	208	325	488	285	173	303	206	274	282	221	376	202	159	256	155	301	516	202	306	424	368	164	276	360	189
826	chr1	85814718	85815945	10	27	10	9	7	5	7	10	10	11	12	15	5	4	2	55	50	23	21	25	9	16	9	10	25	4	13	11	19	39	93	27	17	30	33	6	18	23	13
827	chr1	85946041	85947186	83	182	147	101	90	106	136	126	108	164	227	195	112	114	117	147	300	169	123	161	120	166	189	130	195	119	106	140	110	168	305	100	134	184	247	78	162	135	97
828	chr1	86633918	86635409	42	101	80	31	24	31	25	43	38	73	135	84	49	44	56	57	105	73	54	96	30	77	85	60	90	66	47	60	39	63	121	49	31	39	74	25	30	43	39
829	chr1	86941840	86944224	238	522	300	179	114	102	134	188	179	263	366	301	155	153	173	443	675	300	315	486	216	451	426	233	465	256	200	275	250	403	711	207	415	397	412	209	342	320	183
830	chr1	87151686	87154533	158	306	198	139	100	113	146	202	184	221	295	261	116	120	147	263	446	206	160	274	138	259	224	162	299	185	117	192	172	248	387	192	286	213	287	130	270	266	162
831	chr1	87565853	87568265	281	685	360	207	124	93	133	123	161	127	180	120	57	56	58	444	564	210	340	647	239	489	389	196	352	227	228	300	324	531	719	259	472	401	318	252	317	320	249
832	chr1	87568809	87570940	56	95	89	70	53	40	60	42	34	66	91	83	33	36	34	38	54	49	48	176	88	87	56	58	100	68	60	84	57	112	198	73	76	66	136	48	70	67	76
833	chr1	87572721	87574186	57	151	80	53	45	30	35	24	14	42	53	37	15	24	22	69	104	42	69	99	56	91	67	31	75	59	49	75	64	105	132	46	114	82	82	46	77	82	58
834	chr1	87687344	87688593	13	15	71	39	32	43	59	47	18	59	99	67	38	51	42	24	32	66	15	39	48	43	24	55	167	10	22	32	17	33	38	28	50	38	79	18	34	39	32
835	chr1	88921266	88923854	239	549	305	157	169	140	189	192	197	247	355	298	126	147	143	369	649	266	288	456	167	365	392	223	418	236	189	262	185	353	624	254	396	365	379	192	407	333	247
836	chr1	89129177	89130215	262	484	292	254	186	211	249	374	284	274	391	318	166	210	210	469	729	373	251	383	239	414	549	283	735	309	201	332	212	346	623	205	404	442	449	238	518	516	206
837	chr1	89230409	89231835	174	377	196	105	82	75	142	114	135	128	191	141	77	67	95	320	451	158	169	280	127	336	300	117	302	214	133	193	208	285	382	163	290	247	283	196	305	256	162
838	chr1	89436510	89437489	20	10	38	17	27	35	52	23	11	19	21	21	16	9	20	16	12	5	11	13	38	10	39	20	61	35	16	22	14	29	80	24	74	64	96	21	11	18	12
839	chr1	89762095	89763791	140	244	179	127	118	70	122	77	80	43	73	46	24	22	31	150	169	81	189	264	93	162	181	70	146	137	86	96	61	136	266	89	167	187	218	121	104	99	85
840	chr1	90058621	90061397	169	293	203	114	81	61	92	108	105	93	169	93	61	46	65	236	325	118	174	342	163	197	261	90	239	176	158	170	198	272	502	162	366	239	291	177	354	310	167
841	chr1	90080972	90082690	81	201	113	98	67	46	85	53	68	77	109	81	50	31	48	149	211	101	101	161	78	167	126	76	120	75	74	79	76	159	195	78	178	138	155	76	121	99	89
842	chr1	90232899	90234151	189	408	174	109	64	47	68	89	114	73	154	104	57	45	55	328	469	158	210	360	134	291	262	104	227	177	96	156	177	285	427	116	294	239	195	150	229	200	143
843	chr1	91259039	91261018	205	422	313	217	139	138	201	192	222	211	285	234	144	119	147	408	622	282	243	349	185	341	360	188	412	229	171	244	195	378	465	163	438	348	383	202	372	372	202
844	chr1	91642495	91642940	13	16	9	5	5	4	2	1	1	0	2	4	3	3	1	29	41	11	20	35	10	46	15	14	17	2	0	1	1	10	14	3	5	5	4	6	4	5	5
845	chr1	91737990	91740109	120	398	267	237	147	149	180	122	104	219	298	224	116	105	146	218	347	216	155	348	130	280	188	184	165	156	154	140	138	254	473	188	291	153	391	112	266	186	188
846	chr1	91810112	91810650	6	6	3	12	4	11	17	6	6	13	19	11	7	15	22	19	35	19	4	1	2	5	12	10	19	4	2	4	1	3	2	2	4	6	8	1	24	24	13
847	chr1	92123553	92125083	29	66	29	46	11	7	4	17	26	28	41	45	24	15	24	145	210	70	70	72	10	114	69	36	62	14	1	4	2	15	14	1	2	16	9	8	108	68	46
848	chr1	92536561	92537705	197	529	275	205	140	108	151	133	171	135	220	201	85	80	118	460	620	212	274	440	165	372	381	174	311	201	169	243	263	375	621	186	339	304	333	173	320	301	234
849	chr1	92719925	92725586	244	620	296	203	125	72	134	101	90	241	339	249	118	123	150	184	272	64	388	495	300	517	335	118	373	336	227	301	367	623	784	246	407	414	393	336	655	587	348
850	chr1	92776122	92777155	4	32	48	69	38	43	68	35	12	107	105	111	45	52	65	12	12	35	14	16	56	19	8	40	79	27	22	24	8	28	58	40	48	30	55	17	21	36	33
851	chr1	93022924	93023821	17	73	41	18	21	12	14	14	24	30	63	36	26	19	19	82	115	50	47	87	29	90	77	28	52	27	41	42	18	46	79	27	32	77	38	32	41	46	36
852	chr1	93069858	93071258	320	636	345	304	213	206	285	291	234	223	346	353	189	165	216	567	798	333	398	538	218	536	545	210	608	394	202	323	282	416	710	211	483	486	449	262	582	521	231
853	chr1	93075825	93077150	2	15	34	41	28	24	58	27	6	64	61	61	34	33	29	23	25	56	4	10	21	23	9	59	53	6	21	15	6	14	23	18	10	11	54	2	7	15	25
854	chr1	93079957	93082742	10	48	88	103	89	95	175	60	22	214	188	206	110	102	88	35	54	136	21	39	47	89	29	172	152	26	67	29	13	53	86	56	51	15	114	20	26	81	56
855	chr1	93198283	93201189	174	407	285	175	156	128	143	127	138	225	299	213	110	118	134	285	431	254	213	393	180	449	267	228	423	123	208	243	154	261	319	116	262	315	247	143	280	259	232
856	chr1	93213031	93214159	17	32	56	50	55	45	65	23	6	66	90	65	31	28	32	37	41	82	23	51	32	38	23	64	82	31	41	39	10	33	52	15	33	32	56	17	44	30	29
857	chr1	93316508	93318285	276	498	384	319	234	234	293	312	254	385	467	432	230	209	269	464	700	379	291	466	267	404	412	294	524	319	246	351	253	390	688	226	460	386	545	249	428	431	281
858	chr1	93385621	93387811	14	23	59	37	28	39	47	73	31	126	116	149	58	43	43	31	35	57	33	19	25	37	23	71	88	15	15	21	14	29	44	16	22	15	68	9	23	42	34
859	chr1	93417637	93419786	260	505	346	227	172	143	206	286	240	324	459	371	191	206	249	406	658	331	251	417	207	390	400	249	571	258	209	292	202	378	668	224	430	351	458	214	415	408	239
860	chr1	93583163	93585378	320	569	365	204	173	148	219	208	209	234	391	323	133	165	184	461	688	329	326	493	241	449	448	232	475	344	240	338	252	430	789	263	559	405	488	220	417	415	259
861	chr1	93918918	93920416	43	104	65	64	34	19	22	28	21	51	93	68	30	32	37	115	150	107	123	198	45	287	160	74	207	20	25	36	35	45	57	26	40	56	52	17	82	60	59
862	chr1	94084209	94086408	84	201	131	104	67	56	84	83	89	50	117	73	27	31	30	193	302	119	226	248	70	215	254	72	147	102	74	72	91	136	234	74	172	156	161	68	121	112	65
863	chr1	94116490	94118327	156	279	278	196	147	199	270	155	134	337	387	362	194	193	217	300	486	353	188	322	175	310	344	206	421	228	173	205	129	242	518	185	299	290	438	160	302	306	196
864	chr1	94146711	94148212	61	130	55	62	37	21	30	22	27	38	70	36	22	16	18	98	108	35	59	140	37	90	78	42	62	44	60	54	76	97	147	45	98	84	103	40	68	66	57
865	chr1	94655612	94657285	185	324	165	141	75	66	113	67	75	103	151	106	63	48	64	291	434	160	175	374	111	252	184	96	146	164	122	165	170	257	516	141	230	230	235	129	203	187	147
866	chr1	95164207	95166065	126	195	95	1	6	4	8	48	59	29	60	44	25	22	21	47	73	9	28	44	15	35	30	22	47	117	66	121	29	59	280	42	356	251	174	70	184	141	88
867	chr1	95310236	95311840	59	164	139	74	61	94	114	84	56	146	199	177	100	88	118	122	225	171	74	125	68	107	82	119	160	53	66	90	63	92	222	87	83	111	216	57	103	113	76
868	chr1	95471926	95472943	104	195	94	80	45	29	42	39	61	57	89	65	24	23	26	163	209	72	115	161	67	171	135	64	120	86	74	111	90	141	205	65	170	166	136	93	119	105	71
869	chr1	96959445	96960970	66	133	63	56	55	29	32	55	45	46	98	51	42	28	39	125	179	61	92	129	44	122	69	33	74	81	62	64	70	121	179	54	74	67	100	46	76	64	69
870	chr1	98158647	98159875	57	144	74	100	74	81	83	78	81	39	48	32	31	21	25	5	20	12	101	146	65	67	134	68	105	40	18	14	86	122	262	79	170	174	112	119	69	85	63
871	chr1	98643794	98644322	2	3	9	0	1	2	6	14	7	51	47	50	26	23	23	1	0	1	5	2	11	2	1	1	6	2	3	0	0	2	4	3	2	3	4	1	1	1	0
872	chr1	98899469	98900417	4	5	1	9	6	4	3	0	0	5	2	2	1	1	1	2	0	1	27	37	21	4	1	2	3	5	1	1	2	5	45	1	62	118	43	73	22	31	28
873	chr1	100004487	100005105	18	50	70	62	42	54	85	51	21	126	162	128	80	81	86	42	79	101	26	59	51	45	45	80	108	20	34	32	23	48	125	51	54	45	115	28	38	38	40
874	chr1	100087540	100088837	221	530	280	204	129	108	127	95	91	163	310	206	106	96	108	341	524	205	252	424	177	405	313	142	255	239	205	250	217	417	605	196	377	323	341	204	356	268	231
875	chr1	100207474	100208812	126	323	146	103	64	60	81	89	94	95	133	104	61	59	67	240	375	128	195	240	104	220	227	76	202	174	81	127	147	215	315	112	225	203	156	110	184	185	98
876	chr1	100274958	100277550	346	873	432	261	194	185	258	239	274	312	418	380	162	171	166	639	926	378	403	612	235	596	471	268	542	367	278	399	341	514	718	251	578	516	525	258	448	435	276
877	chr1	100370517	100371705	79	169	112	75	62	66	76	52	56	113	165	133	77	64	74	108	186	102	82	164	57	141	109	70	99	90	65	100	63	107	189	68	129	107	146	60	124	117	79
878	chr1	100487350	100488396	113	180	170	128	106	106	130	149	105	190	236	191	107	128	117	186	270	192	131	231	114	178	246	123	277	154	96	114	114	162	315	130	197	208	255	121	194	165	113
879	chr1	100503785	100505185	137	372	213	128	103	96	110	108	98	155	270	194	96	102	119	189	298	176	128	337	126	292	226	167	215	160	108	188	142	195	385	154	231	237	281	120	220	159	163
880	chr1	100589202	100591710	164	293	224	177	131	108	173	145	140	204	298	250	157	134	142	301	413	216	192	288	140	241	273	191	259	186	136	210	145	211	487	192	279	206	391	132	263	268	180
881	chr1	100957604	100958144	8	5	11	88	57	62	87	16	11	4	3	10	7	3	6	13	21	26	2	1	4	4	7	16	16	8	6	12	1	1	13	8	9	27	42	10	6	8	13
882	chr1	101132621	101135438	153	351	263	194	115	139	197	230	180	250	341	266	174	189	184	324	510	250	150	318	188	246	242	173	462	175	162	225	135	257	476	158	274	255	372	141	280	327	159
883	chr1	101262989	101265109	133	341	300	213	148	144	206	107	88	266	357	287	163	169	187	274	415	280	207	356	195	307	271	184	291	189	199	165	145	252	487	167	292	223	390	128	333	273	186
884	chr1	101473256	101478524	249	382	407	212	158	199	243	220	178	345	401	346	157	224	204	298	469	492	369	420	191	374	265	315	436	303	165	241	130	239	537	160	502	286	660	145	569	569	396
885	chr1	101545275	101549037	68	115	193	252	237	176	265	177	115	353	430	340	180	196	217	167	312	423	101	125	113	183	191	297	359	70	69	126	42	96	180	73	113	128	237	71	282	240	238
886	chr1	101601805	101603948	5	11	28	61	43	29	29	40	19	33	59	45	24	31	27	21	45	121	8	15	14	63	23	154	136	6	8	4	2	10	20	9	7	7	24	9	20	19	46
887	chr1	101608898	101613138	15	26	71	102	108	109	158	110	50	273	290	294	147	135	160	83	101	363	35	27	64	259	136	641	608	40	29	30	5	9	22	12	18	22	47	4	13	11	24
888	chr1	101626336	101628658	13	35	99	44	55	58	87	105	48	205	216	198	114	125	137	36	67	180	25	29	48	97	41	242	207	25	34	28	9	34	48	19	26	35	90	11	28	38	80
889	chr1	101644421	101649365	49	105	328	774	670	622	985	330	135	393	459	344	220	246	262	190	273	659	76	109	161	216	129	584	521	81	114	133	74	138	347	186	138	162	544	97	112	186	247
890	chr1	103840491	103841932	58	106	139	121	64	89	119	90	65	169	249	170	115	111	110	72	158	166	48	123	97	101	117	147	169	68	76	85	57	80	216	96	124	117	205	54	111	110	88
891	chr1	107399901	107402575	131	308	181	165	105	104	150	126	115	141	251	208	111	106	136	245	336	140	224	303	101	239	239	130	216	146	120	136	118	250	360	148	216	204	250	140	214	200	117
892	chr1	107794964	107796293	15	20	50	43	31	60	72	33	15	80	70	74	42	47	64	26	32	39	10	7	43	22	16	43	72	23	30	30	10	23	41	48	56	53	100	11	13	21	27
893	chr1	108543921	108545086	22	38	18	91	58	33	37	18	23	6	4	4	1	2	2	4	7	6	14	48	11	10	12	4	7	51	40	73	4	8	10	2	20	13	11	5	5	4	3
894	chr1	108903067	108905493	78	123	131	55	38	45	56	74	54	164	173	156	76	98	83	96	146	73	86	136	68	98	83	81	117	42	69	76	55	100	189	83	125	88	163	58	76	59	48
895	chr1	109004985	109006303	69	205	86	94	71	62	79	51	43	107	169	161	95	62	78	148	234	103	107	120	84	234	202	82	152	114	93	142	81	112	251	74	157	133	141	81	131	106	73
896	chr1	109035595	109037844	266	521	380	269	177	191	215	296	259	283	377	325	156	176	217	486	804	327	317	485	245	481	459	244	472	300	219	317	270	414	696	256	457	420	495	253	445	418	266
897	chr1	109046432	109048790	13	37	59	45	38	52	76	40	31	95	114	111	53	63	54	33	55	56	32	33	27	49	38	76	88	33	25	28	21	48	52	23	46	11	62	16	51	65	32
898	chr1	109090445	109091798	182	374	205	192	125	102	146	111	114	145	226	172	97	106	96	329	467	243	137	323	128	291	279	150	310	218	125	208	155	256	506	154	281	237	267	139	260	294	172
899	chr1	109220766	109221590	79	212	86	48	44	43	39	47	42	49	94	65	32	29	27	123	169	75	92	215	50	131	94	73	66	80	57	83	86	122	237	66	115	87	131	72	90	72	64
900	chr1	109306547	109307968	149	355	212	131	79	68	105	95	98	117	172	139	81	73	92	201	300	134	150	319	110	230	146	104	203	161	111	158	168	280	431	161	268	226	236	121	190	204	140
901	chr1	109385653	109386605	205	482	217	143	96	82	97	2	9	65	129	109	49	34	41	280	485	174	161	367	130	328	207	103	209	214	131	239	155	319	421	171	323	290	266	147	244	252	146
902	chr1	109419846	109420627	156	302	235	169	113	152	180	9	8	272	357	281	160	162	202	207	395	268	144	270	142	264	317	150	453	186	130	213	163	239	438	159	262	310	354	146	293	257	164
903	chr1	109434484	109436239	80	202	143	106	85	86	119	13	13	151	256	178	113	102	99	115	193	157	101	148	87	176	164	121	211	101	99	130	107	161	251	114	139	170	234	58	136	111	95
904	chr1	109443940	109445225	377	787	395	325	193	232	226	71	119	236	361	280	161	170	166	522	872	375	402	513	243	599	655	250	612	425	275	459	302	464	816	285	608	523	543	347	668	562	280
905	chr1	109447458	109447900	1	4	13	10	8	8	5	0	0	16	21	26	7	14	7	10	12	9	6	13	8	7	7	15	10	6	13	6	3	9	18	7	2	7	11	5	7	8	5
906	chr1	109557680	109559358	178	327	203	155	106	106	136	150	129	200	312	240	160	172	204	300	426	231	182	421	130	254	281	159	301	169	126	251	127	232	570	170	136	267	305	104	216	223	151
907	chr1	109583732	109585286	30	33	41	34	25	18	30	41	29	37	48	55	27	31	23	66	97	36	75	78	13	43	62	18	63	32	18	20	21	34	76	18	27	14	39	19	52	73	19
908	chr1	109627074	109628120	66	167	94	91	45	36	52	44	43	61	97	77	33	29	45	94	130	92	59	143	75	120	85	61	72	105	60	102	78	127	207	47	110	73	155	54	106	78	97
909	chr1	109769355	109771339	198	347	203	172	102	105	142	125	134	202	249	220	123	112	132	255	449	244	156	316	170	270	247	160	381	236	161	200	146	259	506	153	315	232	373	196	319	365	167
910	chr1	109827912	109829337	132	303	152	125	73	57	90	88	86	61	117	94	35	36	53	234	357	132	194	160	95	258	233	77	194	115	77	153	153	246	256	94	255	243	166	124	211	187	103
911	chr1	109837879	109838712	106	222	83	94	54	52	65	57	61	63	95	100	54	48	48	171	237	112	116	157	91	194	159	65	147	112	71	86	90	133	239	74	131	147	163	64	127	142	70
912	chr1	109891271	109893227	206	417	221	176	145	124	156	168	176	196	306	241	116	123	110	349	534	236	226	316	160	294	324	150	354	233	133	199	165	271	453	190	337	311	335	175	311	299	204
913	chr1	109963071	109965485	115	263	192	140	91	97	121	146	125	167	206	191	103	100	105	244	333	221	146	278	120	196	177	137	229	146	115	150	108	175	300	122	161	167	245	82	162	133	108
914	chr1	109999756	110000724	73	153	97	55	46	40	46	49	48	56	68	64	45	38	30	92	129	67	49	100	39	67	66	39	69	87	42	68	60	66	179	54	94	108	145	57	111	91	59
915	chr1	110031570	110032262	84	198	73	48	36	26	46	62	76	2	0	0	0	0	0	142	206	97	0	0	0	2	0	0	0	0	0	1	72	119	133	59	233	187	183	44	93	94	40
916	chr1	110254254	110255860	66	96	74	58	44	46	41	41	42	22	41	37	12	20	14	162	277	84	126	99	45	137	263	48	171	56	14	46	63	113	139	50	125	137	99	52	110	90	47
917	chr1	110267235	110268146	7	12	4	6	7	6	6	5	4	3	5	15	7	3	5	17	27	6	9	5	5	16	34	10	28	4	1	3	5	5	12	5	5	14	20	5	13	15	1
918	chr1	110275112	110275886	6	13	8	15	13	7	12	14	5	7	9	18	5	11	12	26	37	10	16	6	5	15	33	20	42	6	3	3	5	12	15	4	5	8	22	7	13	14	3
919	chr1	110328528	110329666	89	190	88	48	54	35	34	65	73	25	54	48	26	17	24	149	257	61	114	157	44	158	158	38	111	94	75	80	63	112	176	60	118	134	111	61	109	113	63
920	chr1	110378144	110379584	101	217	120	92	73	50	97	77	76	93	125	115	56	53	50	191	291	133	146	190	77	172	200	86	174	91	92	137	95	152	247	87	171	171	146	84	134	116	70
921	chr1	110554131	110555494	13	39	9	13	24	12	20	4	16	8	8	6	1	5	4	37	50	19	60	77	18	22	22	6	29	16	23	22	9	20	47	10	20	20	19	9	16	14	8
922	chr1	110681739	110684703	304	700	391	269	228	166	265	267	261	277	424	320	164	170	219	511	831	341	416	507	221	547	518	251	567	404	225	339	329	507	755	240	566	396	531	315	508	492	282
923	chr1	110751182	110752572	188	382	199	155	107	108	142	142	148	158	237	197	120	112	129	322	474	211	241	327	129	328	334	141	312	214	132	175	136	274	451	178	292	280	273	176	311	250	137
924	chr1	110978425	110981343	26	55	101	93	64	72	98	47	27	150	190	154	93	97	109	38	67	166	39	64	86	60	36	85	117	39	60	106	43	69	87	63	57	68	98	34	72	91	65
925	chr1	111018437	111019369	42	82	25	6	12	7	8	7	8	3	11	5	4	2	9	25	34	18	38	83	29	33	16	7	24	24	25	41	31	63	35	21	39	47	23	15	39	25	16
926	chr1	111215081	111220207	98	161	374	279	230	290	391	321	178	781	779	639	346	385	379	193	339	581	147	204	287	208	160	564	609	117	207	215	92	139	464	224	277	261	648	77	154	217	195
927	chr1	111223786	111225442	12	22	60	51	55	52	70	57	38	133	131	127	63	67	55	25	42	75	24	31	48	28	24	101	155	13	30	42	10	23	55	39	35	44	125	12	31	34	36
928	chr1	111231888	111232549	2	6	10	16	7	5	13	15	8	31	39	37	9	23	14	9	6	24	5	13	12	10	8	20	22	5	5	7	1	4	23	5	7	2	25	3	5	4	7
929	chr1	111235121	111236670	3	11	28	25	17	23	33	27	15	69	97	93	23	31	19	12	17	51	15	13	26	25	4	51	61	2	17	15	4	10	26	13	29	13	60	8	11	11	11
930	chr1	111242561	111243846	9	13	29	18	17	21	46	26	13	74	64	88	26	29	29	15	26	42	9	13	14	28	14	46	52	3	17	10	5	9	30	13	9	12	44	6	12	18	10
931	chr1	111245793	111249752	56	108	182	116	90	122	145	196	106	378	431	412	122	153	141	131	165	229	150	102	144	151	72	268	199	47	86	108	31	81	161	95	82	54	201	71	74	117	120
932	chr1	111251203	111251510	3	5	15	6	6	3	7	3	6	19	21	16	6	11	7	3	5	7	4	1	5	1	2	5	4	2	4	0	2	3	0	4	3	4	11	0	3	6	2
933	chr1	111307124	111308703	250	445	246	124	111	136	183	220	222	300	359	309	162	198	225	406	700	277	306	336	197	348	466	182	635	288	132	279	178	347	632	179	354	402	431	233	480	537	165
934	chr1	111471905	111473200	4	14	43	33	31	34	68	23	9	93	93	75	47	49	32	17	23	48	12	21	31	23	12	39	69	15	20	20	10	13	33	44	23	19	87	9	4	17	31
935	chr1	111475587	111477363	18	23	66	34	48	38	55	65	30	129	149	169	67	83	94	39	42	87	19	40	56	33	53	77	108	14	32	37	13	36	64	39	42	28	135	15	15	14	30
936	chr1	111482961	111487584	280	481	460	283	216	210	297	319	242	506	666	491	265	269	291	573	861	510	431	523	291	523	630	437	949	375	301	391	236	368	860	360	561	456	824	290	492	492	358
937	chr1	111526504	111528980	5	23	50	102	99	95	147	99	28	121	123	107	40	40	41	22	40	77	23	19	21	28	15	86	56	5	36	19	9	26	62	45	15	5	90	7	7	22	39
938	chr1	111529283	111533999	44	61	169	307	232	234	335	254	141	331	375	328	150	148	165	81	112	198	71	58	86	110	76	207	170	44	77	64	27	82	189	117	56	31	197	40	45	66	100
939	chr1	111534282	111550074	337	562	649	2123	1710	1767	2406	1585	1077	873	1147	939	486	500	555	536	824	684	465	460	368	574	596	548	944	335	320	449	385	578	1133	422	483	334	853	374	625	706	485
940	chr1	111557808	111562165	93	131	457	410	338	367	527	374	208	731	828	688	337	406	420	184	268	566	136	166	284	210	172	493	617	84	201	193	96	170	371	197	199	177	523	133	165	186	273
941	chr1	111563097	111567808	107	156	367	483	384	369	480	289	200	515	564	507	247	282	322	164	270	429	127	166	231	214	238	404	572	121	174	202	94	196	369	175	261	163	564	130	210	203	238
942	chr1	111573799	111574410	8	11	24	5	14	11	12	31	13	122	109	101	45	41	61	2	0	4	7	14	28	19	31	47	68	12	36	29	13	21	24	28	25	25	49	5	1	7	10
943	chr1	111574660	111576002	3	8	10	9	7	15	10	13	4	97	94	71	48	37	41	3	0	2	4	8	14	6	17	34	55	12	8	12	5	12	12	3	15	11	26	4	4	6	2
944	chr1	111576232	111576701	1	1	4	0	6	2	5	8	1	34	30	18	11	6	7	0	0	0	1	1	4	2	2	13	11	2	3	2	2	0	0	1	2	3	7	1	0	0	2
945	chr1	111578403	111580106	6	10	18	10	5	8	6	27	6	151	149	158	72	57	71	2	1	4	5	14	24	21	14	38	64	5	5	16	2	11	26	11	13	7	28	10	3	6	2
946	chr1	111587989	111590350	9	17	14	5	13	10	9	20	22	181	182	161	78	82	70	3	4	2	17	15	16	24	18	55	74	9	8	13	6	13	23	11	15	5	23	8	5	4	3
947	chr1	111779471	111779712	2	2	3	5	1	1	8	8	3	8	12	15	5	16	5	2	4	3	2	2	4	1	4	4	2	4	6	3	3	5	12	3	4	3	6	0	6	5	5
948	chr1	111792878	111794077	71	164	115	83	65	60	71	85	70	153	170	134	87	63	81	127	195	104	83	152	76	165	126	95	151	90	96	87	67	122	249	80	116	130	175	76	137	106	98
949	chr1	111849793	111850397	25	38	46	20	14	18	26	31	25	76	51	53	24	44	27	53	53	58	17	25	25	34	42	36	72	20	16	28	17	27	44	17	44	40	69	19	54	36	29
950	chr1	111851541	111852874	71	113	115	70	38	62	94	63	43	100	137	140	60	77	85	127	162	117	53	86	86	95	82	96	139	77	79	90	62	84	169	70	130	121	186	54	98	110	68
951	chr1	111859611	111860848	29	34	29	4	4	6	4	23	22	56	64	60	30	31	26	47	71	19	26	35	32	36	57	27	63	40	13	38	22	41	59	22	63	51	58	26	61	54	15
952	chr1	111936843	111937656	26	44	38	40	32	24	42	45	31	65	53	58	31	33	45	42	74	87	31	41	29	31	40	62	100	33	22	47	17	35	51	28	43	34	65	16	37	44	27
953	chr1	111944487	111946079	10	20	62	63	44	59	85	64	25	94	82	96	54	68	81	37	55	127	15	24	38	24	26	89	115	21	31	41	19	34	44	24	44	43	59	17	32	44	35
954	chr1	111948022	111948546	16	9	26	28	19	28	36	38	13	40	52	33	32	17	40	35	55	58	12	15	13	14	18	22	32	11	11	20	7	13	30	14	21	17	28	9	25	27	14
955	chr1	111960163	111961330	10	11	61	48	32	73	81	57	27	75	86	78	45	37	71	40	61	94	11	22	43	24	15	50	89	15	29	30	11	28	51	32	55	37	91	12	37	34	36
956	chr1	111962984	111965501	119	188	131	89	64	53	87	93	95	124	164	162	79	65	73	235	310	187	147	193	97	173	138	148	192	123	77	134	96	142	227	105	157	153	150	49	124	136	104
957	chr1	112060609	112066574	76	76	120	108	84	96	130	199	102	279	313	330	118	143	142	135	196	180	84	111	79	139	128	181	323	71	77	80	43	105	171	69	86	33	134	63	127	201	83
958	chr1	112082423	112084120	103	213	107	50	30	20	34	48	57	54	123	83	54	44	57	102	131	67	50	241	74	143	114	56	117	88	106	133	81	149	348	89	74	217	126	209	171	157	95
959	chr1	112098956	112100590	176	392	206	190	133	127	149	158	149	146	294	211	123	88	117	309	462	201	155	311	118	338	266	147	271	185	129	183	169	258	418	143	344	285	342	150	332	292	190
960	chr1	112739677	112741571	42	72	61	79	41	51	68	33	31	78	112	77	36	37	50	74	76	44	29	71	25	49	58	43	45	24	41	55	35	58	169	82	50	61	151	29	60	45	43
961	chr1	112743553	112744075	1	3	14	18	31	29	42	15	7	25	22	21	19	12	19	2	14	13	4	4	8	4	0	11	18	1	2	5	3	7	13	13	15	6	42	5	3	12	8
962	chr1	112962041	112965299	256	601	522	363	221	256	348	407	316	487	626	426	262	259	296	516	805	509	318	475	319	521	544	388	723	370	301	391	230	416	741	312	518	510	615	259	493	480	281
963	chr1	113017176	113019803	100	197	163	80	60	75	99	86	78	143	224	196	78	97	71	153	257	98	140	153	83	151	209	109	193	119	99	90	65	136	232	102	186	103	191	86	152	184	111
964	chr1	113042358	113043349	11	13	11	19	7	14	17	15	9	14	27	28	11	15	13	16	29	7	5	9	9	9	15	10	19	12	9	9	8	12	20	8	12	9	25	8	24	29	6
965	chr1	113043807	113050022	130	209	181	193	148	159	170	227	177	370	476	434	197	240	206	196	273	151	93	223	122	222	237	174	260	164	119	165	106	183	437	180	167	130	344	127	202	304	141
966	chr1	113050743	113051752	57	124	62	32	28	15	24	20	24	18	55	24	16	11	19	74	101	22	43	116	43	85	86	29	49	36	51	74	63	100	184	69	55	109	91	41	63	49	41
967	chr1	113299404	113302387	363	820	467	346	259	202	312	357	337	279	404	338	170	171	168	695	934	474	439	787	289	542	521	309	500	428	283	467	351	578	1096	365	624	545	581	302	489	485	314
968	chr1	113416702	113418261	135	362	178	129	88	85	115	104	98	116	184	165	85	83	92	284	394	195	145	297	98	232	213	107	214	152	124	182	143	239	467	119	146	195	235	118	180	189	138
969	chr1	113733953	113735612	16	47	21	40	23	23	25	18	26	7	12	4	7	2	3	125	183	71	9	44	10	46	18	18	42	19	7	15	16	31	64	21	16	19	43	13	12	7	14
970	chr1	114102910	114104746	186	523	306	205	152	140	172	168	133	258	369	270	149	127	154	365	518	210	232	393	179	431	323	191	381	253	201	284	307	414	633	215	419	336	410	234	389	365	212
971	chr1	114155708	114157329	157	379	223	189	116	120	156	111	119	184	232	230	85	84	83	272	410	199	204	273	123	328	255	147	213	137	143	187	144	276	402	151	229	207	268	137	225	248	160
972	chr1	114215452	114216847	62	38	127	94	67	87	100	194	102	217	258	210	107	136	125	97	177	191	71	104	80	82	140	160	280	66	71	92	31	71	149	69	118	123	170	41	94	81	77
973	chr1	114248196	114250087	138	249	185	172	116	106	139	126	102	177	268	181	85	112	119	201	311	191	119	308	122	218	208	148	264	155	120	184	116	217	415	121	211	175	314	137	184	178	135
974	chr1	114272306	114275016	153	301	190	109	91	94	140	211	159	177	211	215	102	109	120	254	426	171	167	283	115	273	237	162	280	157	106	163	122	236	345	126	202	220	279	110	214	216	141
975	chr1	114854351	114856789	219	570	268	183	137	92	157	150	171	224	284	247	129	126	135	448	584	254	333	479	213	424	403	205	432	245	215	281	286	410	650	248	365	357	362	174	347	290	203
976	chr1	114925371	114926781	93	157	170	163	114	152	186	166	121	193	279	216	126	126	161	182	261	206	119	299	149	193	176	160	284	137	131	147	107	202	322	117	167	177	263	94	149	149	127
977	chr1	115060077	115061564	66	123	101	96	63	69	106	98	78	159	189	165	88	85	100	147	214	110	89	107	73	160	154	99	147	63	72	69	70	110	149	67	113	91	167	90	157	168	75
978	chr1	115100872	115102924	173	300	273	191	149	143	199	236	196	266	305	247	170	166	201	334	509	266	209	295	159	319	346	181	498	182	142	216	154	266	365	140	319	261	374	176	324	335	163
979	chr1	115124290	115125317	218	486	286	194	147	133	159	245	247	199	298	267	165	159	173	451	627	316	232	391	176	430	346	188	385	275	158	262	256	324	610	184	352	381	360	211	424	315	188
980	chr1	116320106	116321126	13	19	19	27	13	9	18	6	8	5	14	10	4	7	5	20	12	5	23	25	18	21	20	11	18	25	9	6	48	44	70	20	82	79	41	26	69	58	29
981	chr1	116716864	116723136	247	539	342	361	284	326	470	377	303	309	425	338	194	208	228	451	656	334	258	493	209	343	342	319	539	259	242	312	227	365	590	285	359	334	441	175	317	369	279
982	chr1	116735639	116736072	2	0	1	7	13	8	11	7	3	18	18	26	3	9	5	0	2	8	1	1	2	5	1	12	8	0	1	1	1	1	2	3	1	0	6	0	2	2	3
983	chr1	116746111	116748058	8	19	37	38	39	31	48	51	33	72	69	101	31	36	41	21	32	50	11	27	23	22	17	42	54	11	13	17	5	15	39	20	10	3	50	15	29	30	27
984	chr1	116748485	116753834	47	40	126	159	115	125	159	149	84	268	295	307	130	131	143	131	150	143	58	83	62	89	104	167	160	46	61	71	40	61	128	86	49	24	165	55	90	92	88
985	chr1	116761846	116763264	145	332	209	125	76	76	114	78	102	143	165	165	64	79	77	270	323	136	165	251	134	264	231	94	255	171	111	153	142	247	374	125	247	244	228	147	276	218	135
986	chr1	116854523	116856300	13	22	29	36	28	33	27	41	21	76	114	102	54	62	38	20	41	57	21	42	24	34	18	66	41	14	24	20	17	28	61	25	16	16	57	14	26	33	35
987	chr1	116856975	116858573	5	16	44	35	21	38	38	44	18	66	93	91	36	38	44	31	43	41	21	39	26	41	30	56	55	18	12	31	15	40	42	28	21	11	55	23	41	43	37
988	chr1	116859008	116863415	44	89	131	118	90	140	125	155	81	219	268	275	121	154	164	82	148	145	82	91	66	126	86	193	205	39	76	90	44	98	160	89	81	53	252	63	103	131	94
989	chr1	116865014	116868732	14	46	80	87	55	74	105	72	35	174	162	172	70	84	89	52	64	81	27	24	38	50	46	147	150	22	41	34	17	42	67	46	24	16	117	17	25	52	44
990	chr1	116868936	116870137	5	13	27	8	24	20	36	32	7	44	64	63	23	22	24	12	36	21	17	18	7	21	18	47	55	7	17	12	12	20	21	10	17	7	38	7	12	28	30
991	chr1	116870318	116874448	10	31	99	64	64	90	115	69	41	172	151	186	79	73	80	77	106	94	40	28	30	80	66	135	227	18	34	26	6	27	59	49	32	15	118	22	32	96	64
992	chr1	116875513	116878922	36	54	60	65	48	70	81	76	40	127	113	110	34	42	47	74	128	58	79	65	24	69	100	78	142	41	38	27	26	53	77	35	44	28	87	39	81	94	35
993	chr1	116882134	116883966	12	9	50	43	37	58	62	42	27	89	98	93	37	58	52	26	33	64	19	18	25	28	25	65	81	13	24	30	7	15	31	27	21	12	72	16	21	38	31
994	chr1	116884070	116884944	2	11	35	30	13	28	42	21	12	55	72	57	30	48	27	17	31	30	15	9	18	21	11	33	41	9	17	12	2	14	9	15	10	7	49	5	6	12	16
995	chr1	116888110	116891068	39	60	114	118	91	110	168	129	67	219	198	207	104	121	97	71	142	110	73	80	56	67	94	115	174	47	81	83	50	94	115	78	73	44	212	38	68	113	80
996	chr1	116900436	116906350	59	101	230	333	284	378	518	217	121	440	419	409	245	260	279	169	254	305	103	139	142	182	132	369	458	96	134	161	70	135	254	135	188	156	400	61	172	267	188
997	chr1	116911579	116917058	396	602	518	541	446	422	587	443	381	533	731	551	361	337	390	727	1072	452	547	620	294	671	703	513	862	400	335	489	337	604	832	357	656	591	771	292	667	749	412
998	chr1	117169938	117171935	6	7	16	157	98	86	121	27	17	21	15	18	13	12	14	15	17	17	16	16	13	6	20	17	32	9	11	3	10	17	23	14	17	18	44	16	16	18	11
999	chr1	117222135	117223871	15	19	32	98	57	79	105	54	29	72	93	71	52	69	67	38	49	41	18	36	22	17	52	31	44	11	15	18	22	40	132	38	33	73	76	67	32	45	43
1000	chr1	117402333	117406682	194	339	345	498	353	352	529	290	250	362	410	368	191	228	229	389	629	442	268	425	232	340	318	343	464	244	206	259	192	316	548	215	445	240	581	175	330	290	210
1001	chr1	117450810	117451222	1	3	8	16	12	10	16	9	4	8	9	9	6	6	2	2	7	12	4	3	4	4	1	8	9	5	6	2	1	4	4	1	0	1	9	1	2	5	5
1002	chr1	117452318	117453745	2	7	17	28	24	42	55	21	7	25	34	42	12	17	13	12	9	16	2	9	9	17	4	22	25	4	9	4	5	10	17	14	12	2	26	7	8	7	12
1003	chr1	117465482	117466508	23	72	26	28	39	16	29	18	16	12	22	16	6	12	14	34	58	31	29	54	13	63	39	22	30	20	16	32	33	43	65	20	30	20	45	10	26	28	16
1004	chr1	117710008	117712221	285	619	315	193	135	82	119	104	158	141	229	163	93	70	91	520	708	228	319	556	212	442	366	162	345	213	202	250	309	441	667	261	379	424	275	254	344	306	224
1005	chr1	117949781	117951352	70	223	108	20	19	11	16	21	26	25	34	25	12	17	12	81	120	146	53	142	88	152	53	58	135	89	73	166	63	123	79	31	65	174	62	24	71	67	35
1006	chr1	118272888	118274706	108	224	138	106	81	68	96	89	82	124	167	141	68	71	82	149	269	149	113	233	84	207	152	92	191	122	96	141	91	180	318	107	121	138	213	89	151	138	105
1007	chr1	119327218	119329813	51	40	43	2	5	5	8	5	9	18	24	15	13	7	14	6	7	5	3	30	39	17	8	11	21	2	2	1	78	109	145	73	86	34	118	82	32	81	26
1008	chr1	119330816	119332510	54	44	51	1	4	2	9	3	3	10	19	12	5	5	7	0	6	3	2	35	40	7	4	12	18	1	4	4	74	94	162	91	81	122	111	68	57	79	41
1009	chr1	119483937	119485690	133	311	308	220	179	197	237	301	191	320	354	336	175	202	229	315	521	320	235	313	207	313	383	193	515	214	138	183	147	227	432	169	404	303	467	176	372	337	180
1010	chr1	119991384	119992909	81	190	77	68	53	39	51	18	17	13	29	25	19	11	8	76	106	31	55	189	50	170	121	54	117	98	64	121	112	189	243	60	106	104	87	89	128	132	75
1011	chr1	120055814	120057406	44	67	28	35	24	21	35	32	33	13	17	26	21	14	17	56	103	35	71	86	27	53	106	19	70	85	29	64	62	93	114	55	98	118	97	34	50	43	27
1012	chr1	120413125	120413888	31	346	19	17	11	3	8	10	6	38	86	73	33	25	29	287	477	31	16	23	2	352	361	30	183	24	5	10	66	31	37	13	35	36	92	8	49	109	10
1013	chr1	120639580	120640024	5	333	10	8	2	1	0	5	0	61	98	88	53	29	39	103	192	7	3	16	3	188	111	5	83	11	5	9	74	17	29	11	8	9	174	0	77	120	2
1014	chr1	141831748	141832903	49	37	51	77	64	45	73	8	10	36	47	40	21	23	31	124	220	141	199	309	138	138	119	86	132	118	79	121	10	39	115	26	120	78	69	129	27	33	45
1015	chr1	142308722	142309458	2	6	5	6	2	4	7	1	0	6	8	6	3	7	3	12	24	16	56	126	31	2	1	0	1	25	11	19	11	32	51	24	14	3	2	7	14	4	4
1016	chr1	142534617	142536030	46	633	66	23	24	25	16	36	37	227	345	249	132	120	120	419	636	39	50	41	21	372	512	39	443	51	35	65	140	65	116	32	96	76	390	40	209	282	36
1017	chr1	142624985	142625363	6	24	20	13	6	5	5	0	0	5	11	4	3	2	3	12	17	23	4	41	10	26	10	15	16	11	10	16	10	30	41	16	11	3	9	10	11	11	7
1018	chr1	143231311	143231846	22	14	24	6	5	3	14	8	11	5	9	4	5	5	4	35	26	16	25	21	10	16	19	11	22	18	13	10	7	17	27	8	28	25	14	9	16	18	12
1019	chr1	143232312	143232595	1	6	9	8	5	6	11	10	10	7	5	1	1	1	0	9	18	13	10	15	8	1	12	9	8	9	17	14	0	10	23	13	16	17	8	3	2	6	17
1020	chr1	143244783	143246039	400	470	1442	2071	1593	2104	2863	1896	1195	1734	1965	1672	550	703	775	811	1368	2943	561	954	1634	877	670	2719	2907	521	638	920	273	694	529	602	1086	332	909	228	280	265	312
1021	chr1	143304922	143306079	23	324	29	32	25	17	27	23	29	132	280	204	88	73	93	180	318	49	35	83	11	205	212	43	125	33	30	25	88	51	74	44	56	36	186	17	104	91	23
1022	chr1	143642394	143644297	140	355	195	161	95	80	121	83	90	118	201	164	82	81	74	250	408	191	110	325	93	259	177	133	182	140	129	160	159	248	472	194	173	178	270	124	198	170	132
1023	chr1	143807551	143808630	122	201	138	89	82	87	105	130	123	121	175	142	70	94	90	181	302	144	110	171	86	157	162	129	218	125	91	117	104	160	288	87	157	199	199	87	159	176	93
1024	chr1	143920126	143920796	22	22	27	31	21	9	17	13	21	6	11	9	8	6	8	78	75	47	41	47	15	36	32	37	40	32	14	29	25	74	126	36	37	58	4	17	23	24	17
1025	chr1	144093524	144094883	466	1183	2384	2063	1457	1891	2610	1720	993	3711	4030	3658	1362	1763	2008	1201	2145	3204	526	1072	1905	1614	1265	3089	4190	773	1082	1546	774	1347	1189	1226	2871	1408	2838	730	1461	1618	1327
1026	chr1	144148791	144156111	276	361	766	245	297	392	489	543	309	1349	1485	1331	583	755	714	454	785	1162	346	216	390	470	586	988	1644	158	207	320	127	258	244	207	406	636	644	211	518	552	346
1027	chr1	144166303	144167461	9	21	61	51	37	53	70	73	28	90	88	105	61	77	64	29	30	93	16	30	37	30	26	89	114	23	37	26	16	42	65	35	62	29	92	13	32	38	34
1028	chr1	144181424	144182280	159	281	214	148	99	90	151	131	166	241	293	227	145	141	176	246	388	231	161	344	126	237	296	188	384	165	138	223	104	217	521	180	211	219	291	114	246	217	175
1029	chr1	144185433	144186049	33	60	27	7	7	5	8	9	9	8	16	10	7	6	8	34	40	7	17	49	12	24	22	12	10	22	14	20	14	27	40	23	26	28	53	19	20	35	21
1030	chr1	144188003	144189091	113	234	121	115	68	67	104	106	91	94	137	108	81	62	64	173	274	143	111	280	81	193	143	101	163	103	103	155	101	165	354	109	134	169	211	93	137	115	89
1031	chr1	144217331	144217636	4	1	9	23	7	6	16	6	3	12	19	13	4	9	9	1	10	10	2	6	8	11	1	13	11	0	3	5	3	2	8	2	7	5	7	4	5	7	7
1032	chr1	144217734	144219401	103	194	240	156	121	155	194	194	136	252	324	241	163	156	164	222	332	285	129	233	137	213	238	172	359	151	133	147	115	175	345	140	225	177	376	103	227	228	165
1033	chr1	144226463	144228353	108	232	149	86	77	54	99	116	123	129	158	142	89	80	73	216	329	126	141	238	87	195	173	76	187	122	94	116	114	161	279	117	173	180	169	94	194	170	101
1034	chr1	144286389	144287905	109	221	82	68	42	48	42	79	80	62	90	80	40	35	34	174	236	67	102	240	60	118	132	64	83	77	58	106	89	150	315	84	124	137	135	64	154	101	78
1035	chr1	144300086	144301478	41	116	76	77	42	51	64	57	46	92	119	118	58	78	62	71	93	89	64	62	49	105	54	69	112	74	65	76	69	88	107	41	131	63	108	67	123	92	64
1036	chr1	144321869	144322786	152	360	182	123	80	76	122	52	57	85	148	114	46	53	69	282	399	151	203	320	105	264	287	121	203	169	126	172	168	268	322	139	238	262	212	136	227	208	114
1037	chr1	144538087	144538611	69	839	86	67	49	38	60	50	44	172	263	206	114	116	119	359	609	83	75	172	57	480	459	60	490	114	42	69	144	114	226	65	111	96	485	76	246	410	72
1038	chr1	145022029	145023715	426	626	1726	1941	1187	1563	2225	848	537	2722	3004	2744	949	1287	1372	576	1033	1849	298	691	1347	759	485	1577	1960	682	925	1201	372	712	735	684	1479	615	1369	522	1220	1328	922
1039	chr1	145109862	145111812	120	319	189	113	76	80	88	103	78	106	172	131	85	70	88	252	353	129	147	295	92	226	221	87	184	129	97	135	126	200	322	115	213	198	214	108	174	156	93
1040	chr1	145180431	145181981	121	269	158	71	67	53	70	94	94	98	151	127	64	62	63	243	325	117	138	292	129	221	227	114	160	147	89	91	132	199	332	110	277	210	235	105	122	153	96
1041	chr1	145479260	145480085	5	5	10	1	1	2	1	15	18	50	59	58	26	15	27	3	6	1	2	3	7	3	3	5	11	5	4	4	3	12	24	3	23	22	39	9	6	4	3
1042	chr1	145537588	145538856	67	122	61	35	20	24	33	17	24	28	56	41	22	20	21	96	98	37	70	75	41	73	52	25	43	52	44	60	63	78	121	47	106	104	87	48	65	59	46
1043	chr1	145866935	145867632	106	61	66	75	46	40	61	52	55	10	8	9	13	10	16	103	122	102	92	181	74	71	39	52	72	81	71	92	34	115	262	76	146	119	65	73	67	46	77
1044	chr1	146090993	146091348	12	11	20	9	5	4	6	7	9	4	2	4	0	2	2	6	23	15	23	34	8	11	8	8	13	6	16	10	4	20	27	7	22	23	9	13	14	6	10
1045	chr1	146202059	146203129	138	200	535	573	440	654	842	511	351	1667	2051	1805	608	800	876	250	446	633	364	525	492	663	615	1177	1706	306	286	412	140	331	149	210	619	338	390	66	357	292	160
1046	chr1	146272873	146274096	309	541	1176	1690	1082	1432	1888	1210	745	2343	2584	2268	877	1188	1364	552	926	1509	588	823	1145	779	456	1177	1692	619	580	749	394	882	672	560	1491	712	1325	252	656	653	419
1047	chr1	146460422	146461529	275	3300	625	547	311	458	610	403	262	4812	5847	5083	1276	1893	1971	2607	6570	690	87	222	280	3751	4027	407	10436	263	323	519	941	403	310	292	571	283	6968	5	1723	4220	7
1048	chr1	146542803	146543263	23	22	28	7	6	6	6	6	22	2	5	3	1	1	4	22	38	11	25	29	12	13	26	11	16	16	15	25	15	19	37	15	26	23	19	7	10	9	9
1049	chr1	146607509	146608845	617	577	1670	2154	1545	1757	2299	2022	1226	1709	2080	1777	606	878	910	947	1697	2477	1156	1939	2388	1016	1028	1848	2687	647	898	1414	606	1379	1438	1246	2140	1146	1739	883	1272	1339	1067
1050	chr1	146822502	146823521	34	37	43	33	21	26	19	13	8	27	36	28	14	8	18	51	80	58	48	135	24	30	30	46	42	41	24	38	8	37	90	29	38	52	38	21	25	25	31
1051	chr1	146871344	146871746	159	521	338	340	220	250	336	333	256	1293	1677	1528	458	699	697	464	899	411	80	224	274	184	223	30	575	110	135	301	298	202	157	192	273	147	641	147	854	867	208
1052	chr1	147033180	147033747	1	0	2	2	1	4	3	3	1	0	2	0	1	2	4	0	0	3	0	1	1	20	8	60	42	1	0	1	0	0	1	0	53	26	19	1	1	0	1
1053	chr1	147460295	147461315	62	35	112	64	48	65	73	66	30	47	57	50	39	71	70	21	61	93	16	28	33	34	50	76	133	34	51	73	31	60	77	57	61	33	48	20	48	43	30
1054	chr1	147481341	147482466	18	18	66	115	62	119	139	121	49	123	134	123	38	65	66	36	48	80	20	58	56	33	29	54	88	36	51	38	21	49	58	36	63	36	38	38	53	29	40
1055	chr1	147489664	147491777	1094	1306	3882	3945	2754	3393	4763	2946	2025	3568	4080	3540	1452	1905	1892	1988	3324	4710	926	1905	2384	2241	1730	3899	4680	1321	1596	1956	995	2082	2246	1775	3137	1938	2525	2208	3278	3064	2688
1056	chr1	147780206	147781042	13	9	24	230	160	232	222	178	124	113	112	91	47	69	81	83	175	194	109	193	239	147	139	380	333	16	18	25	61	114	129	101	45	14	37	16	21	21	17
1057	chr1	147872122	147872945	32	15	119	159	137	167	229	172	106	26	16	15	22	26	37	24	38	162	42	70	157	27	15	195	99	27	68	82	15	51	45	64	165	66	57	38	39	29	83
1058	chr1	148049050	148052059	220	172	627	558	431	324	483	320	234	143	128	100	84	109	110	115	150	402	234	571	432	254	85	637	216	273	383	408	141	446	713	363	499	302	504	217	200	169	473
1059	chr1	148122681	148127270	1140	2668	3650	3767	2426	2030	2761	1885	1485	3226	3641	3328	1357	1681	1782	1468	2510	3902	1270	3053	2532	2736	1393	3486	2754	1828	2007	2454	1423	2838	3744	2075	3468	2121	5192	1128	2109	1892	2552
1060	chr1	148137624	148138546	68	148	68	59	51	31	46	36	38	71	77	69	35	36	50	67	156	61	75	154	31	73	79	38	81	82	50	78	58	79	163	40	88	99	118	47	91	85	41
1061	chr1	148166041	148167181	179	336	297	223	149	160	224	181	162	297	425	339	172	161	193	342	519	299	240	363	180	342	323	210	413	238	162	253	179	278	526	192	299	273	419	164	308	339	206
1062	chr1	148248718	148249680	77	225	90	89	51	36	53	48	47	70	139	97	40	49	58	169	238	86	107	199	82	197	155	69	142	92	73	105	100	155	295	88	133	143	141	81	150	124	88
1063	chr1	148305445	148306731	97	157	157	94	75	74	110	70	67	194	206	169	93	104	111	151	262	130	110	201	78	130	194	97	188	103	85	96	83	139	270	85	189	135	230	105	163	143	95
1064	chr1	148387680	148391264	246	486	355	246	164	162	223	161	150	361	428	374	196	202	209	412	588	320	261	349	231	456	386	339	422	214	219	250	215	368	474	206	339	318	471	167	333	273	240
1065	chr1	148392941	148394022	10	10	43	42	23	37	41	27	18	63	72	71	40	41	40	31	30	42	14	17	29	34	47	61	73	15	28	18	18	34	40	9	32	17	62	17	25	47	21
1066	chr1	148394146	148394755	7	22	17	31	10	29	18	19	9	44	39	44	24	17	17	19	28	23	9	9	9	28	18	25	37	10	10	8	12	11	18	21	14	6	30	10	21	18	14
1067	chr1	148397583	148403165	216	330	574	1150	722	850	1118	433	266	952	1002	1041	476	631	616	335	588	716	137	266	379	484	378	657	911	273	317	419	245	385	726	302	490	360	1098	244	574	641	460
1068	chr1	148452345	148452951	23	52	72	52	41	49	73	35	23	73	84	67	49	62	48	45	65	49	41	61	41	42	36	56	75	38	39	46	26	43	80	31	70	63	106	33	60	60	41
1069	chr1	148473232	148476291	337	669	554	567	394	397	525	498	369	561	789	614	353	413	418	540	849	653	388	654	429	547	552	454	754	408	356	471	299	543	884	418	588	534	977	316	687	607	466
1070	chr1	148502088	148502901	6	24	29	25	16	21	26	21	21	54	59	55	35	39	55	17	32	31	11	15	19	29	21	38	45	10	18	16	8	18	29	19	20	6	48	18	34	30	17
1071	chr1	148507312	148508543	70	167	111	86	82	42	101	67	66	110	159	112	77	69	68	157	211	98	83	121	55	135	129	85	155	119	85	101	73	106	199	84	147	115	180	66	117	115	64
1072	chr1	148532647	148533255	75	180	147	97	89	97	119	102	70	156	230	174	109	107	130	147	241	175	105	173	84	145	188	101	195	143	109	127	78	159	326	106	158	146	215	80	179	146	124
1073	chr1	148560281	148560996	131	274	161	107	104	82	118	88	75	146	204	162	80	96	99	224	288	147	119	183	91	184	174	116	191	145	105	141	125	169	315	123	183	181	220	114	194	206	117
1074	chr1	148601850	148604947	250	554	538	354	263	324	386	415	284	578	752	588	336	369	353	488	777	576	337	497	339	506	532	422	767	350	278	345	285	437	768	351	546	494	765	302	513	491	390
1075	chr1	148726122	148727106	89	142	155	114	80	90	115	148	98	157	196	173	97	102	104	122	241	184	84	156	113	162	206	167	267	112	99	124	83	131	265	105	169	148	218	78	201	148	114
1076	chr1	148754390	148755083	30	101	63	54	40	18	30	21	24	42	73	44	21	21	25	70	98	57	34	135	35	109	65	53	57	48	34	45	45	86	157	57	57	68	120	30	44	41	53
1077	chr1	148800045	148803549	229	398	416	170	126	171	240	226	173	396	551	448	250	278	331	258	452	398	163	239	378	490	396	418	889	255	287	415	198	354	485	203	429	424	452	168	520	572	282
1078	chr1	148806306	148808406	49	90	212	91	49	111	142	123	58	233	211	237	102	152	149	66	126	172	68	63	139	120	119	190	364	76	83	130	49	115	133	59	163	135	279	59	102	137	85
1079	chr1	148808687	148809862	13	25	55	26	26	26	54	41	33	83	96	104	34	46	35	25	51	64	15	18	52	49	23	69	122	25	37	27	15	21	37	15	38	35	103	18	29	57	32
1080	chr1	148810046	148813242	73	122	188	87	85	120	167	205	103	368	361	392	183	238	221	98	165	173	77	82	153	168	113	256	412	93	110	119	46	119	134	75	152	147	221	50	159	243	108
1081	chr1	148813487	148819414	348	891	816	417	329	386	522	575	451	788	1041	880	398	436	482	626	1030	656	447	580	547	727	720	654	1019	448	437	573	387	598	975	449	718	792	944	351	739	855	489
1082	chr1	148850669	148851268	6	12	24	12	19	39	31	20	14	46	56	47	31	28	52	4	20	27	7	10	21	9	17	28	66	15	13	15	7	14	16	10	24	22	17	6	11	20	14
1083	chr1	148867788	148869182	130	224	179	150	102	98	128	161	117	171	238	191	127	124	135	221	322	197	138	237	106	219	234	155	237	150	140	158	100	188	340	131	186	180	232	118	158	196	126
1084	chr1	149004584	149005175	6	19	66	60	42	52	82	49	23	121	113	134	64	73	58	19	32	68	15	7	48	12	20	78	120	15	31	39	12	21	50	47	47	54	118	10	10	21	34
1085	chr1	149115022	149116329	112	199	161	100	81	73	93	111	80	127	168	134	73	94	87	230	343	176	105	184	105	197	182	107	247	100	80	142	104	155	280	112	152	203	165	115	148	134	96
1086	chr1	149165040	149166011	42	71	94	50	58	56	75	37	38	87	122	81	60	58	51	67	106	89	53	108	59	69	73	69	108	61	49	51	40	55	137	51	65	89	132	31	70	77	67
1087	chr1	149212725	149214550	89	212	115	60	39	23	28	46	55	29	43	35	15	16	17	193	262	89	155	188	40	176	153	56	99	84	52	120	105	134	153	70	140	150	75	64	76	82	83
1088	chr1	149247210	149248267	51	112	63	51	44	30	39	46	40	57	85	64	36	31	35	73	118	78	52	108	30	102	83	46	76	58	42	46	50	75	148	51	59	80	106	48	81	57	59
1089	chr1	149286572	149288271	85	185	90	75	66	53	81	69	84	96	174	121	79	85	73	147	278	101	125	158	49	156	156	95	131	74	71	89	59	139	212	78	130	123	162	56	115	129	78
1090	chr1	149288522	149292129	41	35	115	120	115	155	204	125	67	256	284	279	134	145	167	74	104	150	41	44	68	92	45	171	261	32	51	57	13	57	107	59	80	45	209	43	46	107	95
1091	chr1	149296642	149299890	214	400	249	151	183	169	201	304	245	242	365	293	168	189	198	438	702	255	274	405	155	321	444	184	461	233	189	277	201	286	606	203	344	365	434	191	367	424	223
1092	chr1	149309123	149310592	220	443	357	267	165	206	258	239	189	276	381	314	158	169	174	353	575	316	304	367	201	401	322	238	443	288	182	259	174	376	463	200	497	388	467	190	411	358	242
1093	chr1	149370202	149370814	24	53	58	7	5	16	16	16	14	13	25	21	15	8	8	13	5	2	29	21	13	22	8	17	20	55	22	48	26	42	56	14	74	64	101	20	20	14	15
1094	chr1	149395586	149396856	29	32	46	72	58	69	69	49	32	120	165	126	92	67	88	45	84	61	20	64	33	36	35	36	74	34	32	43	28	46	96	40	52	43	106	33	47	48	47
1095	chr1	149404735	149405904	56	72	135	106	68	90	90	114	81	178	237	201	109	128	140	102	153	164	67	111	90	93	139	134	250	87	72	84	66	106	206	97	117	115	237	66	160	155	88
1096	chr1	149428664	149429619	188	235	201	136	97	112	130	143	122	159	202	191	91	99	101	230	371	181	163	244	119	222	227	142	294	120	113	125	124	214	334	132	266	274	316	131	245	211	144
1097	chr1	149437178	149438418	97	220	163	98	95	95	106	69	67	123	214	156	96	89	106	182	276	176	109	234	90	197	207	141	238	135	106	148	84	127	325	126	147	162	224	90	181	138	112
1098	chr1	149493473	149494276	113	233	166	124	97	102	132	110	112	107	161	145	71	70	78	184	308	136	116	203	96	189	186	141	204	142	88	115	99	164	274	95	160	150	207	100	183	168	110
1099	chr1	149520123	149522709	278	497	274	187	172	150	203	226	224	220	340	233	164	144	182	418	622	216	273	384	172	357	376	172	425	331	172	283	217	365	552	201	420	361	390	212	402	412	209
1100	chr1	149526119	149530745	94	202	141	128	104	101	126	139	137	139	213	213	106	112	119	156	228	104	104	122	58	231	184	100	244	143	77	138	74	162	206	73	128	61	155	124	240	314	91
1101	chr1	149530939	149532781	52	68	62	52	41	47	65	66	42	85	124	139	45	78	71	83	115	56	43	68	32	92	88	63	149	65	27	45	26	65	104	35	66	29	75	32	92	123	42
1102	chr1	149565953	149567505	110	244	176	124	90	67	128	179	125	201	303	232	128	120	126	201	259	199	108	211	108	187	149	130	220	104	134	163	111	164	302	116	208	209	275	144	159	170	161
1103	chr1	149579883	149582158	10	34	74	90	90	99	120	76	42	125	136	114	89	81	80	46	60	89	20	27	44	63	52	79	125	25	31	52	25	42	63	37	72	39	128	20	39	66	45
1104	chr1	149582648	149583441	7	8	22	26	17	31	30	19	15	28	29	35	7	29	23	15	14	15	6	12	17	17	26	22	38	5	10	11	5	14	25	11	26	3	34	8	20	10	18
1105	chr1	149584834	149587524	70	142	245	190	166	183	225	168	100	304	392	315	192	192	193	111	224	226	108	111	115	158	179	214	321	91	118	112	89	125	249	138	197	170	361	77	187	165	143
1106	chr1	149638295	149643077	138	2036	213	218	174	201	256	191	103	335	482	426	220	229	244	193	357	250	114	227	156	19424	225	235	347	134	164	179	130	158	344	163	228	162	426	102	207	259	168
1107	chr1	149697008	149699068	113	180	147	65	56	50	59	75	78	115	123	124	56	66	75	151	219	125	117	140	85	136	134	120	189	89	88	152	70	137	199	86	223	162	168	56	132	138	91
1108	chr1	149778804	149779692	60	157	69	14	7	20	37	55	67	49	55	52	23	38	40	162	218	111	68	104	29	146	161	71	177	105	52	76	56	105	195	58	80	78	98	50	132	123	63
1109	chr1	150002018	150003575	88	230	128	110	61	62	96	46	59	111	137	127	51	63	74	178	291	115	119	175	101	191	178	81	177	108	98	124	97	139	232	83	226	179	151	85	147	133	93
1110	chr1	150029221	150030360	45	86	42	16	22	12	24	26	30	33	58	39	27	17	23	91	158	60	60	123	22	71	75	40	65	42	17	33	37	57	133	31	63	89	73	37	38	36	32
1111	chr1	150078442	150079496	52	55	30	88	71	68	65	28	16	9	14	15	6	6	11	26	29	10	23	18	18	44	51	30	39	52	3	13	28	52	119	35	75	59	66	43	43	50	16
1112	chr1	150148163	150149707	178	478	259	169	108	84	140	96	105	102	161	124	66	65	81	303	482	198	279	352	151	353	295	125	265	199	149	223	220	365	512	161	356	374	279	202	352	269	173
1113	chr1	150273418	150276322	66	79	100	21	22	51	78	25	23	125	174	137	63	58	67	91	163	71	70	116	81	172	161	138	229	66	82	97	54	106	271	65	156	172	255	66	109	104	117
1114	chr1	150286532	150287976	88	163	135	88	63	69	99	73	67	111	140	136	55	66	61	137	256	131	88	152	84	191	186	121	236	138	87	150	69	120	296	61	144	190	226	73	148	139	91
1115	chr1	151500445	151502016	16	14	19	29	23	32	37	7	5	13	15	13	8	15	3	13	11	16	1	5	19	19	6	32	15	28	11	34	23	45	88	46	82	77	106	27	53	75	43
1116	chr1	151582610	151585377	23	13	47	82	75	92	151	55	42	76	109	97	55	51	71	46	75	68	21	4	18	33	40	45	63	15	14	15	11	19	48	32	87	59	103	46	50	72	35
1117	chr1	151774454	151775779	59	71	51	37	33	27	22	25	42	29	42	34	15	9	19	9	16	10	91	111	31	46	31	19	63	39	30	49	20	28	74	16	59	102	60	39	98	87	45
1118	chr1	151784025	151785215	35	69	28	22	30	22	21	16	13	69	94	64	39	51	29	8	7	5	33	89	39	35	20	26	51	46	42	63	13	26	35	30	20	40	38	21	69	53	39
1119	chr1	151804551	151806060	28	28	38	19	13	20	14	15	15	33	53	40	15	20	36	10	19	1	16	18	29	21	26	20	65	26	15	23	12	19	43	7	36	53	35	30	80	77	20
1120	chr1	151837627	151838351	41	59	83	25	23	36	33	56	21	76	81	82	42	38	53	36	51	57	17	30	30	40	25	50	69	42	39	34	35	39	68	38	58	50	66	25	62	57	36
1121	chr1	151866046	151866862	4	11	8	6	0	12	7	10	12	15	31	32	11	12	18	41	52	19	7	3	2	49	84	25	58	5	1	4	2	8	11	4	8	1	5	1	6	8	1
1122	chr1	151872358	151873883	235	545	241	179	108	127	173	221	171	204	335	273	126	135	171	481	628	231	293	433	179	458	376	154	405	281	193	196	210	412	543	177	434	344	421	196	423	411	186
1123	chr1	151885707	151887918	31	49	63	86	47	66	77	60	43	116	107	114	42	63	56	41	70	71	29	50	33	81	47	72	108	42	34	32	33	56	87	29	51	26	83	35	74	98	36
1124	chr1	151888205	151889684	11	18	21	45	30	31	52	34	25	25	36	41	22	29	25	15	30	27	10	11	13	19	20	26	44	13	17	19	13	28	26	12	16	9	27	9	28	49	18
1125	chr1	151897144	151898733	85	247	113	97	64	56	95	62	54	107	141	121	69	51	56	192	311	118	118	188	69	243	204	96	141	122	90	100	127	175	282	90	116	159	170	99	173	153	96
1126	chr1	151899704	151902819	16	45	74	91	59	84	121	81	54	152	170	159	70	99	101	39	76	94	24	38	54	62	31	96	134	24	39	60	29	57	67	34	64	28	121	17	61	87	45
1127	chr1	151909632	151910795	50	111	115	95	55	93	104	89	59	99	157	141	86	78	115	111	202	114	84	117	63	111	122	81	148	92	56	78	49	83	208	86	119	98	199	62	107	128	53
1128	chr1	151966459	151970776	181	340	287	314	245	258	394	174	134	253	370	298	135	167	195	270	394	295	200	310	166	357	329	270	390	218	203	251	150	265	503	190	294	293	510	155	315	282	217
1129	chr1	152014009	152015417	96	229	110	39	32	22	34	34	48	59	99	69	19	27	30	135	251	70	141	202	67	238	188	60	172	90	85	80	100	144	199	85	181	143	168	66	99	105	84
1130	chr1	152022159	152023222	188	404	227	151	106	88	147	110	119	153	251	191	86	70	86	345	480	211	223	374	140	343	308	160	255	170	175	177	146	278	417	142	292	290	336	149	270	178	179
1131	chr1	152028606	152030335	26	53	71	31	28	28	42	46	25	79	90	69	34	32	45	51	85	111	10	16	39	80	73	73	128	29	60	58	26	42	101	28	49	33	111	44	60	65	54
1132	chr1	152160625	152163227	126	226	180	143	76	86	107	114	102	194	276	188	114	103	110	222	293	152	128	193	91	249	179	152	209	137	126	158	111	173	314	119	149	157	239	102	193	204	124
1133	chr1	152183186	152186747	280	588	373	261	212	182	210	172	166	324	474	366	179	190	187	416	591	355	307	482	245	582	381	255	488	264	249	347	251	421	676	252	440	336	396	227	468	416	260
1134	chr1	152196579	152198511	139	289	171	97	105	112	144	171	131	227	309	250	141	176	182	251	416	165	163	261	99	248	280	162	269	145	134	200	116	190	314	129	153	192	252	103	237	258	140
1135	chr1	152201227	152203662	184	407	205	179	144	119	169	148	170	231	358	236	171	172	149	349	514	188	224	403	153	277	301	179	297	240	162	221	187	224	467	198	199	218	338	135	299	267	156
1136	chr1	152205696	152207361	129	303	237	166	118	117	142	134	120	236	331	247	132	117	142	225	372	223	168	267	138	292	222	179	312	166	116	211	145	283	427	141	266	210	328	133	233	232	150
1137	chr1	152211293	152213351	34	45	57	72	55	50	87	68	63	139	190	168	120	100	97	51	75	96	33	63	28	71	68	77	105	43	44	55	34	58	99	45	46	27	113	36	87	80	52
1138	chr1	152216133	152217737	129	289	199	117	86	76	116	112	104	173	216	175	101	84	109	302	370	159	169	326	109	283	220	134	242	152	125	139	171	253	434	171	209	215	257	108	235	187	124
1139	chr1	152229526	152231358	375	527	481	419	268	396	459	517	297	524	573	572	359	384	382	539	841	610	363	426	346	577	716	427	1081	504	316	412	342	513	834	286	721	639	763	349	772	778	332
1140	chr1	152231766	152235079	32	55	118	134	116	122	154	106	75	240	277	255	128	178	144	58	97	170	30	52	84	97	68	152	173	36	73	54	43	97	144	71	96	56	181	42	101	112	79
1141	chr1	152393527	152394891	21	54	43	28	20	37	40	27	22	45	82	77	25	30	25	37	56	33	22	36	15	58	31	46	66	21	33	27	15	44	56	15	17	8	50	15	38	40	22
1142	chr1	152421113	152422963	321	637	377	272	203	179	227	216	224	241	376	353	172	182	187	473	716	343	384	630	232	464	480	217	524	418	286	406	283	469	815	276	451	467	524	246	476	425	280
1143	chr1	152445279	152445708	3	8	12	13	7	12	16	18	5	27	19	19	12	11	18	6	2	6	5	10	2	5	1	14	13	2	4	13	3	7	12	7	2	0	16	2	4	5	5
1144	chr1	152458738	152461019	210	437	363	187	144	115	164	205	193	176	302	254	161	128	149	353	517	263	278	326	177	383	414	191	460	231	157	300	194	313	521	197	397	359	343	154	364	337	192
1145	chr1	152511164	152512192	79	144	138	117	95	95	126	97	82	191	216	208	85	95	99	138	254	157	96	204	76	137	133	111	177	99	89	135	103	154	339	128	108	156	231	68	133	160	112
1146	chr1	152564514	152565079	33	73	24	9	14	4	6	7	14	1	8	4	6	4	2	57	65	17	41	56	20	37	24	15	16	17	23	35	27	41	52	16	15	28	11	22	19	26	20
1147	chr1	152624795	152625091	3	7	9	1	1	2	2	8	4	1	2	0	0	2	4	14	4	25	5	2	2	6	10	26	34	3	7	7	0	4	10	1	2	4	3	0	0	7	6
1148	chr1	152625596	152626459	8	30	14	24	11	28	35	14	14	15	10	21	8	11	18	58	83	82	50	25	10	59	105	77	146	33	39	37	16	21	102	16	46	43	58	4	2	5	2
1149	chr1	152643936	152647809	94	172	111	89	63	49	90	79	52	190	232	209	97	96	123	145	211	206	112	195	56	413	298	284	479	129	113	148	45	96	144	43	112	94	117	84	202	159	103
1150	chr1	152797253	152798880	126	234	143	97	89	39	88	51	66	76	138	88	74	53	55	205	240	118	156	237	85	191	162	83	130	99	129	140	129	177	274	111	188	181	202	91	121	129	100
1151	chr1	152813595	152819066	117	186	223	157	108	153	175	180	106	375	453	473	188	202	226	166	254	186	104	226	119	213	201	189	312	96	121	167	104	241	359	111	144	81	293	138	289	367	187
1152	chr1	152819152	152819873	8	16	18	18	5	18	24	24	9	24	37	36	10	20	23	16	22	19	13	18	6	18	18	16	37	11	15	18	19	15	30	11	8	7	21	20	24	41	19
1153	chr1	152821673	152821913	3	5	10	6	4	4	10	7	9	10	14	12	2	5	6	4	8	7	1	1	5	11	10	8	20	5	4	8	3	17	15	3	1	2	8	5	7	11	4
1154	chr1	152845685	152846029	1	9	23	9	14	20	20	22	12	29	34	36	16	20	19	4	7	18	0	7	14	4	3	15	17	5	5	9	3	4	11	14	10	10	28	5	5	3	10
1155	chr1	152846186	152849339	142	276	206	135	111	127	187	182	137	342	358	357	163	196	202	213	358	200	144	196	164	203	210	140	349	149	148	196	123	241	327	132	340	291	361	143	291	284	151
1156	chr1	152866047	152867407	74	106	99	81	73	61	76	102	76	109	132	150	57	68	82	147	207	131	82	135	59	122	142	72	175	63	78	82	51	87	169	52	115	82	131	54	107	111	69
1157	chr1	153023996	153024371	3	13	19	11	9	13	21	18	10	29	40	36	19	29	25	11	21	20	7	7	7	21	9	29	43	9	9	12	3	9	7	7	13	7	21	6	16	20	6
1158	chr1	153083100	153083389	2	7	3	3	6	8	11	5	5	4	12	6	3	1	5	1	2	2	5	7	1	3	4	1	5	2	2	5	1	4	9	3	7	7	11	3	13	15	9
1159	chr1	153097990	153100127	135	244	258	263	174	234	282	201	141	256	358	280	175	183	207	161	280	316	214	394	245	370	328	269	482	181	218	301	192	393	678	233	296	403	503	192	334	298	236
1160	chr1	153102786	153104117	34	39	56	77	69	55	77	43	31	46	61	45	30	37	43	46	79	44	41	80	57	70	71	47	79	50	58	53	50	97	185	55	77	57	127	49	94	93	57
1161	chr1	153104460	153106686	32	59	74	155	88	67	68	42	26	74	123	77	50	47	55	40	53	38	44	101	94	56	81	60	112	97	86	128	104	132	355	120	99	112	249	54	83	92	56
1162	chr1	153109048	153109705	95	104	138	161	94	95	120	93	64	116	154	128	89	80	114	130	213	163	58	171	106	78	93	93	155	96	100	164	88	154	377	173	157	181	263	99	125	159	87
1163	chr1	153175108	153177409	171	389	269	263	222	204	286	169	156	316	391	356	194	207	225	327	475	377	221	410	177	336	271	255	355	214	187	247	180	312	544	176	262	256	441	164	246	250	224
1164	chr1	153179255	153182248	126	272	257	267	213	220	305	214	131	302	399	355	180	162	203	255	394	426	148	243	146	320	173	294	325	103	88	164	87	177	249	89	133	126	326	89	181	172	161
1165	chr1	153183397	153184180	7	17	22	20	24	37	42	24	10	26	38	38	12	31	20	26	29	26	14	23	10	20	21	15	33	7	6	11	3	15	25	8	11	7	35	14	18	14	12
1166	chr1	153194199	153194488	16	12	18	20	14	8	15	18	14	23	31	30	9	12	14	13	25	25	3	12	10	13	10	14	16	9	6	18	8	13	18	10	9	14	26	10	19	21	7
1167	chr1	153194887	153196338	47	58	62	49	51	48	55	62	36	136	164	154	81	86	86	47	74	97	36	59	34	49	55	53	110	28	38	51	25	47	99	34	43	59	114	19	60	51	32
1168	chr1	153200352	153201779	209	514	272	155	111	87	123	107	149	125	194	179	89	80	103	391	597	167	249	441	173	401	310	135	231	226	182	203	249	396	519	166	300	244	266	160	342	286	202
1169	chr1	153209617	153210160	32	63	29	34	33	22	40	19	17	14	15	22	7	11	15	54	54	33	13	33	18	44	62	26	61	12	7	17	7	19	33	5	23	38	42	25	33	30	9
1170	chr1	153212698	153215379	181	339	335	235	184	173	258	300	188	361	468	446	215	243	264	298	529	355	217	372	215	293	315	230	477	248	208	269	171	280	511	221	321	274	522	183	267	302	189
1171	chr1	153221732	153222808	41	83	116	111	73	81	148	91	43	166	181	150	69	87	100	79	93	118	45	111	77	79	55	110	128	53	69	58	47	96	146	65	82	62	196	34	58	77	69
1172	chr1	153238041	153241383	194	395	265	213	149	156	174	187	142	260	453	348	211	222	188	277	414	291	231	433	173	339	415	229	413	214	168	248	143	235	507	179	249	271	340	149	266	291	207
1173	chr1	153289638	153290649	51	131	39	33	28	16	23	14	25	15	41	27	11	9	9	69	97	32	48	184	37	54	43	24	33	51	50	44	44	79	130	38	52	55	96	34	30	51	40
1174	chr1	153302645	153303158	56	149	82	53	43	38	54	26	39	65	104	74	41	36	36	88	147	81	35	119	38	101	96	58	84	53	63	80	55	86	196	66	72	86	118	32	60	67	51
1175	chr1	153323959	153324693	33	83	34	28	18	19	39	39	28	22	46	33	19	22	15	79	103	46	51	100	14	62	43	36	44	23	24	51	49	69	111	41	28	53	63	16	32	35	34
1176	chr1	153374127	153375663	252	559	252	186	159	112	172	183	212	218	315	266	143	155	155	466	677	260	292	576	166	410	386	204	377	270	201	274	224	388	675	239	282	334	409	188	346	355	219
1177	chr1	153375842	153376526	6	16	13	20	17	14	26	12	12	49	41	37	16	21	30	16	20	23	8	14	9	22	21	13	24	8	9	14	5	13	19	12	16	12	32	11	19	15	10
1178	chr1	153378868	153379863	55	152	94	67	67	43	70	59	65	93	156	105	47	63	68	106	139	106	85	148	62	117	115	73	127	77	70	96	46	86	204	66	68	102	159	56	90	83	53
1179	chr1	153411756	153412867	108	271	157	94	83	74	104	96	82	101	170	135	86	54	96	227	353	164	158	283	65	240	209	116	216	143	97	127	123	205	353	114	148	198	246	78	187	153	96
1180	chr1	153430731	153431513	65	153	59	67	45	29	59	44	29	40	78	59	30	29	33	129	167	55	123	148	35	90	105	56	91	70	44	74	35	72	106	28	83	76	129	26	60	55	34
1181	chr1	153444880	153445897	97	121	72	57	27	30	40	36	75	47	70	66	21	21	35	128	215	55	143	131	40	123	147	30	112	83	57	74	73	136	113	55	131	125	80	63	118	103	59
1182	chr1	153462915	153464748	145	494	299	253	169	157	225	186	151	292	413	338	177	187	165	348	556	287	214	438	158	373	277	221	352	220	157	210	187	282	453	167	288	242	527	167	306	264	183
1183	chr1	153480525	153481654	159	364	270	178	128	119	159	139	162	155	269	230	106	92	106	388	537	241	233	444	148	299	236	159	202	262	167	207	157	296	488	205	375	293	338	136	213	168	174
1184	chr1	153491638	153492216	48	101	46	31	27	18	23	18	25	27	56	49	22	17	27	81	112	37	46	102	24	81	81	25	57	41	31	51	48	49	128	41	42	63	62	24	52	40	30
1185	chr1	153497974	153499312	157	317	183	168	133	130	158	169	132	227	297	260	159	127	179	224	386	209	246	339	115	262	245	143	295	160	111	169	135	213	346	130	169	147	337	115	221	240	156
1186	chr1	153509088	153510374	206	379	230	139	88	76	133	96	109	122	207	164	89	94	93	297	387	185	314	437	139	286	267	127	228	198	130	215	164	295	356	133	263	285	281	128	219	201	158
1187	chr1	153540911	153541488	18	16	31	15	11	6	17	5	5	25	20	16	7	7	16	5	3	3	1	12	21	2	0	16	11	18	13	16	29	67	142	59	62	60	117	27	28	41	34
1188	chr1	153543835	153546763	168	378	311	251	220	262	361	253	168	454	536	506	253	283	259	257	389	411	149	316	204	270	207	284	332	185	166	265	175	288	513	214	218	251	585	147	231	218	188
1189	chr1	153547771	153548168	6	7	12	12	13	8	20	4	4	27	34	28	13	15	11	13	9	18	4	8	4	2	6	4	11	3	4	7	6	13	10	4	7	5	16	3	10	7	3
1190	chr1	153548519	153549090	6	9	16	23	14	17	17	16	11	30	32	37	9	28	19	6	16	19	8	11	7	11	5	22	12	1	8	11	7	6	19	8	6	9	22	3	11	10	9
1191	chr1	153553850	153555102	11	12	31	26	30	30	36	28	16	62	98	65	42	38	28	23	31	42	17	18	12	23	14	36	39	21	26	22	15	23	40	7	16	13	55	23	22	21	18
1192	chr1	153556207	153558111	49	137	80	69	57	35	54	65	59	153	217	201	80	75	75	81	132	72	63	141	45	124	79	80	70	58	58	76	57	92	161	39	65	49	150	65	85	94	78
1193	chr1	153559436	153561429	162	398	172	146	111	81	134	62	99	92	236	153	76	75	66	215	292	155	152	402	121	248	174	122	129	188	129	192	118	256	496	163	123	147	216	105	161	117	121
1194	chr1	153798603	153799950	516	1156	412	347	214	195	274	348	351	272	514	358	187	152	172	884	1291	334	496	566	305	909	991	230	933	483	295	430	424	567	769	296	848	694	555	346	882	865	315
1195	chr1	153846069	153846754	84	653	138	101	67	58	86	55	50	186	299	232	124	127	138	295	560	107	124	193	72	369	357	69	261	123	73	94	266	194	284	87	153	146	358	79	335	297	115
1196	chr1	153924547	153925751	217	373	203	180	111	85	136	131	158	105	214	128	62	55	70	353	518	188	208	390	158	322	253	135	261	219	168	283	184	326	478	198	331	289	231	157	244	248	179
1197	chr1	153981583	153982339	106	185	153	113	71	72	129	135	105	103	147	126	71	69	81	169	228	161	123	191	100	125	117	112	243	137	115	117	94	186	277	96	242	213	196	107	130	125	101
1198	chr1	154093354	154093896	106	183	97	85	54	57	71	71	68	81	151	104	66	55	57	144	221	105	92	194	61	151	149	77	130	110	68	101	88	117	219	67	95	128	136	74	150	119	73
1199	chr1	154095498	154097427	63	117	78	99	66	66	77	81	83	174	171	160	96	94	107	128	234	99	54	110	67	105	164	75	168	123	77	132	63	94	246	81	119	122	183	76	141	157	76
1200	chr1	154147537	154148565	91	147	108	85	61	62	89	87	65	138	170	155	73	75	79	147	210	91	97	148	67	176	115	80	136	68	66	107	59	116	164	71	78	101	117	50	131	119	62
1201	chr1	154170344	154171610	176	373	261	190	147	186	239	218	196	271	318	281	143	153	155	361	458	277	203	263	185	265	342	215	484	214	147	226	143	255	396	136	384	279	371	139	352	290	196
1202	chr1	154177533	154180163	60	96	64	99	68	77	72	63	52	113	135	168	54	65	55	106	157	66	80	69	45	144	125	71	124	79	38	50	39	66	93	35	84	32	94	56	119	141	56
1203	chr1	154182393	154183173	14	32	46	57	62	51	80	37	35	71	77	75	34	42	50	34	63	46	24	31	46	46	39	69	94	36	21	27	33	37	68	32	44	32	82	24	72	55	37
1204	chr1	154213088	154216894	189	421	340	244	197	162	208	220	224	335	510	411	208	248	263	350	546	360	230	370	216	455	444	315	591	242	228	325	174	296	558	232	372	338	435	172	385	348	215
1205	chr1	154256807	154257694	87	188	115	74	71	69	93	77	63	105	167	147	66	76	74	136	230	146	76	173	77	121	144	83	168	98	77	123	77	108	260	89	76	139	206	71	122	126	82
1206	chr1	154289625	154291725	116	305	178	169	129	93	142	89	97	126	233	170	106	72	87	246	371	176	203	323	90	232	204	106	186	133	144	173	135	214	417	131	148	193	301	111	136	129	125
1207	chr1	154312910	154313692	37	119	36	60	50	30	47	19	21	10	22	12	7	6	9	176	231	72	119	195	19	51	26	13	17	28	12	23	30	66	88	20	25	13	21	43	42	43	21
1208	chr1	154333236	154333979	16	22	20	14	13	22	26	31	22	19	26	29	22	21	28	44	42	22	17	14	11	17	27	13	37	15	14	22	11	17	36	15	24	18	55	13	52	39	12
1209	chr1	154342528	154343280	44	122	46	28	11	24	29	27	35	29	42	39	24	16	21	85	123	52	27	75	16	70	76	27	50	63	37	78	28	58	109	35	78	89	65	38	52	32	20
1210	chr1	154350683	154352031	125	270	79	91	63	54	78	51	68	31	66	50	32	26	28	119	200	53	95	229	55	74	129	46	132	152	84	183	103	191	351	110	143	147	188	91	151	200	88
1211	chr1	154360057	154360565	10	12	8	30	17	17	27	20	17	18	26	23	5	14	13	8	9	4	10	17	8	12	15	8	23	28	14	16	20	36	44	19	21	15	18	32	32	41	16
1212	chr1	154360996	154361940	16	22	22	105	56	79	93	46	30	11	18	15	8	18	17	18	25	33	15	30	23	8	9	13	26	47	48	77	20	55	76	46	37	22	81	31	53	59	33
1213	chr1	154384596	154385237	30	25	40	20	17	18	21	17	12	40	64	50	20	30	30	27	40	40	28	27	29	44	25	50	61	33	28	35	18	39	59	14	24	36	67	28	65	43	21
1214	chr1	154385454	154387341	86	162	181	63	47	58	66	99	78	210	279	219	144	110	144	105	150	278	71	182	125	190	98	182	211	101	139	187	61	183	346	126	104	162	258	69	186	153	139
1215	chr1	154387713	154388131	8	21	14	7	7	9	13	9	3	21	32	25	13	13	18	12	23	27	10	25	20	24	10	25	32	21	15	22	6	20	30	7	10	19	25	9	22	19	25
1216	chr1	154390298	154391338	106	183	118	97	82	88	99	91	70	128	173	149	103	93	92	120	215	143	58	184	79	96	114	119	228	101	94	162	75	147	301	92	81	111	165	67	124	130	102
1217	chr1	154429889	154430813	92	227	187	132	99	113	146	139	95	172	244	205	111	109	119	218	300	168	119	219	102	241	209	144	223	106	101	101	123	161	337	105	194	168	235	105	227	175	134
1218	chr1	154448781	154450173	141	319	241	197	121	145	158	151	122	251	322	267	163	132	172	241	384	274	210	271	154	295	247	191	294	194	159	179	167	233	439	165	244	235	349	129	240	261	143
1219	chr1	154481864	154482702	32	100	37	16	17	18	17	14	25	25	31	23	10	8	13	53	66	21	45	39	14	62	68	23	56	22	14	40	42	74	59	23	88	52	47	21	70	66	18
1220	chr1	154483000	154484256	18	52	22	36	20	24	31	17	25	36	61	45	13	21	31	40	72	24	25	44	11	52	45	26	43	32	22	27	24	39	57	10	36	15	46	34	64	85	33
1221	chr1	154484417	154485132	11	25	20	19	8	12	7	10	12	9	19	14	10	6	13	32	56	12	29	23	15	33	36	18	39	22	5	13	24	28	18	7	16	14	24	8	37	36	18
1222	chr1	154517787	154519651	222	528	300	211	124	133	170	131	128	199	340	265	130	137	113	447	611	246	269	401	198	475	376	187	373	227	204	257	247	352	527	175	406	370	360	212	304	325	227
1223	chr1	154527725	154528115	14	35	10	6	14	10	7	6	6	26	19	28	8	12	11	13	15	6	12	14	7	9	7	4	7	21	8	21	12	26	11	8	4	7	10	6	11	6	2
1224	chr1	154531855	154532258	22	85	48	25	22	19	38	23	18	66	69	69	33	37	37	47	95	40	31	57	17	81	63	33	73	38	30	47	37	50	77	17	30	42	62	35	46	45	24
1225	chr1	154574366	154575407	74	202	130	136	107	94	132	84	88	192	212	163	96	114	109	113	220	166	108	215	90	168	140	133	233	111	103	98	95	157	295	93	139	131	273	89	147	157	109
1226	chr1	154657280	154658347	28	57	48	24	42	26	46	37	40	10	36	16	13	18	15	147	235	94	24	56	28	79	77	67	78	43	25	38	27	49	98	66	55	75	78	43	54	80	47
1227	chr1	154692870	154694026	170	352	192	180	122	131	148	151	148	148	255	180	112	102	139	318	468	243	192	370	126	303	329	175	395	215	153	201	150	237	455	143	212	253	299	141	248	263	153
1228	chr1	154718033	154718416	9	5	15	7	9	13	17	13	12	30	30	33	17	13	21	13	25	17	6	7	9	5	11	18	24	11	8	6	4	12	21	8	14	11	26	5	17	23	10
1229	chr1	154724066	154730242	187	380	380	562	354	330	410	290	226	530	775	625	301	320	356	330	460	508	162	391	264	597	340	561	636	334	230	304	203	396	475	155	243	215	520	172	478	381	332
1230	chr1	154736494	154738308	188	370	239	174	125	98	167	123	157	145	217	210	109	101	120	336	470	202	228	319	142	315	266	183	265	170	145	242	154	248	413	162	287	278	279	139	279	276	177
1231	chr1	154740850	154742165	87	137	126	103	60	75	103	69	71	83	115	117	49	57	63	106	136	118	72	147	85	117	111	104	137	103	74	108	64	101	224	49	77	112	171	57	117	120	75
1232	chr1	154818298	154818628	8	26	18	0	2	0	0	15	9	28	27	15	8	15	11	6	14	4	12	10	7	18	25	9	27	11	8	14	8	9	6	2	17	16	19	7	12	11	7
1233	chr1	154826823	154830586	234	474	317	273	211	199	251	187	170	339	495	438	217	238	218	357	551	335	280	529	208	435	381	251	437	212	237	267	228	402	615	241	347	331	501	214	373	356	226
1234	chr1	154830790	154831695	6	5	31	17	13	18	28	17	10	55	56	41	24	21	26	9	7	27	7	8	17	7	7	29	37	8	13	8	9	12	20	14	18	7	41	4	14	12	15
1235	chr1	154837327	154838615	80	171	146	118	98	74	134	82	62	149	212	159	106	74	108	110	193	146	123	176	66	179	128	100	164	93	72	81	68	116	216	71	158	134	201	76	164	141	103
1236	chr1	154896350	154898307	118	234	176	204	119	114	162	172	154	145	184	142	83	83	91	217	383	179	103	268	125	235	216	144	211	105	68	118	94	128	285	93	149	140	281	98	107	154	86
1237	chr1	154901253	154901765	21	41	41	14	11	13	24	23	15	32	48	43	17	11	22	43	82	54	21	25	19	47	29	22	37	22	13	17	7	14	16	7	16	3	28	8	17	7	9
1238	chr1	154957661	154958147	8	9	12	11	11	20	22	9	4	12	20	28	8	10	13	9	14	13	5	2	5	16	10	19	16	6	8	3	3	5	14	4	7	7	9	5	15	14	7
1239	chr1	154964287	154965768	220	460	282	218	147	119	163	192	190	166	297	216	139	129	137	393	565	243	281	365	173	351	358	182	370	290	204	246	208	346	563	181	401	317	384	173	379	317	205
1240	chr1	154976789	154978671	82	195	198	169	147	116	162	80	69	182	235	194	95	99	104	142	201	175	105	238	105	211	143	175	209	112	120	127	90	149	286	101	155	119	223	78	151	147	113
1241	chr1	154983178	154983949	16	33	32	38	36	35	29	26	24	21	29	21	16	18	16	35	53	21	31	32	18	34	36	22	37	23	16	24	19	32	72	18	33	21	35	14	28	17	13
1242	chr1	154984763	154989029	225	381	332	307	191	185	272	167	169	256	303	267	146	139	181	351	472	269	241	353	183	316	286	202	361	233	226	293	228	401	533	234	393	281	511	159	298	256	210
1243	chr1	155002730	155005139	79	165	151	111	86	98	128	156	104	161	246	196	112	126	156	128	242	157	116	198	120	125	181	123	262	77	103	133	75	146	228	100	138	137	274	76	167	134	90
1244	chr1	155050156	155050781	16	33	21	32	15	12	19	14	13	7	9	10	3	6	6	40	54	26	36	24	11	26	36	13	23	12	9	7	9	13	21	10	33	11	37	14	17	19	12
1245	chr1	155052653	155053700	30	46	51	107	50	64	63	79	50	64	99	82	44	48	52	55	134	81	39	43	47	47	68	43	101	21	34	49	19	44	64	21	46	57	78	15	36	53	17
1246	chr1	155281661	155282667	27	45	28	64	38	24	26	7	11	13	26	18	10	8	4	37	30	8	8	56	26	58	88	30	46	17	10	9	63	109	195	38	62	70	44	54	55	41	56
1247	chr1	155373971	155376343	204	396	217	195	120	104	154	103	123	130	227	167	101	97	115	332	427	183	207	362	137	306	324	120	280	206	196	200	197	284	482	179	272	269	268	167	295	262	160
1248	chr1	157066551	157068246	18	28	62	25	25	53	79	74	25	176	173	160	82	96	100	17	37	27	23	12	13	12	7	23	68	21	37	27	4	18	25	18	41	20	70	3	25	37	31
1249	chr1	157244850	157247711	65	109	351	202	145	240	365	369	184	497	485	426	252	269	294	138	224	395	103	92	256	95	84	301	628	101	147	181	66	117	263	173	314	208	436	56	85	144	173
1250	chr1	157248014	157253863	60	138	254	291	187	266	309	219	110	389	356	354	195	205	222	139	223	337	71	101	198	168	80	318	484	101	120	140	60	127	198	115	184	110	369	63	110	191	154
1251	chr1	157273116	157274045	3	8	13	9	9	14	18	11	4	43	37	48	12	18	17	3	12	25	2	15	8	10	7	36	24	6	9	7	1	7	22	16	3	0	16	2	7	10	10
1252	chr1	157277081	157278955	11	19	30	18	23	21	39	26	5	80	73	73	30	33	36	13	26	47	12	9	14	25	13	42	61	13	19	21	14	23	31	20	7	4	62	6	11	22	16
1253	chr1	157286708	157295735	73	106	219	120	98	170	200	148	73	422	497	473	173	159	209	101	173	215	105	102	130	119	113	252	304	73	122	134	64	146	249	106	83	85	299	72	98	184	147
1254	chr1	157303976	157305206	16	28	68	28	27	56	75	37	22	90	84	107	66	59	82	20	49	112	20	16	52	34	19	93	152	22	24	38	18	34	45	27	80	49	117	18	29	36	46
1255	chr1	157312647	157314796	50	103	144	137	104	162	244	263	135	317	283	310	162	221	199	108	164	171	67	108	172	92	92	142	391	73	113	158	63	120	216	103	257	232	365	87	142	182	123
1256	chr1	158017039	158017733	27	42	16	12	16	16	12	22	19	8	18	10	3	5	5	26	30	16	41	80	20	48	51	17	44	22	19	20	28	48	93	20	30	39	31	19	20	21	19
1257	chr1	158146735	158147322	50	48	31	22	16	21	36	57	38	56	68	65	33	37	49	55	111	48	17	32	29	29	37	31	65	35	19	40	21	43	72	25	33	44	52	27	38	46	19
1258	chr1	158157722	158162470	399	611	343	279	255	279	372	545	483	286	450	381	243	262	284	701	1064	379	430	499	239	510	812	278	1087	475	248	486	316	552	833	300	604	617	502	345	838	876	268
1259	chr1	158267829	158268763	62	195	106	63	50	54	56	30	42	79	139	113	46	55	57	121	194	91	103	149	59	136	129	67	115	94	60	76	80	131	234	82	98	90	170	82	113	86	68
1260	chr1	158334548	158335186	43	75	45	23	20	8	21	14	10	9	19	14	10	6	6	44	67	36	31	72	27	47	22	26	33	28	32	44	28	44	86	27	28	28	52	11	21	25	35
1261	chr1	158335407	158335895	28	41	19	10	6	13	6	8	11	9	29	15	6	10	7	33	52	24	15	54	14	20	21	7	31	28	6	21	14	21	53	16	15	20	12	12	22	22	10
1262	chr1	158348908	158349285	132	193	350	206	102	135	175	2	0	200	211	196	71	81	81	105	222	255	195	268	243	137	71	268	220	213	166	286	47	131	181	187	304	110	170	33	94	106	149
1263	chr1	158440788	158442795	95	121	101	80	66	77	101	66	65	79	152	107	55	44	47	155	171	95	95	202	72	118	120	71	197	92	90	115	87	98	187	72	107	152	166	76	122	140	80
1264	chr1	158452677	158452946	1	3	10	13	13	10	12	9	2	14	22	11	7	9	2	1	3	5	1	4	5	2	2	11	21	0	5	2	0	2	4	7	4	2	5	2	1	1	7
1265	chr1	158498012	158499875	203	390	257	185	152	124	203	161	173	231	318	275	123	148	167	345	459	319	235	323	185	315	303	202	418	212	156	260	178	317	437	178	355	375	395	161	254	268	182
1266	chr1	158521124	158521730	66	133	80	70	41	41	50	46	63	69	113	78	33	32	43	93	152	56	65	115	70	105	112	85	112	72	55	75	63	97	124	54	98	85	114	62	92	83	66
1267	chr1	158579081	158580281	180	358	214	151	106	99	143	184	148	175	273	218	103	123	112	283	446	201	199	300	143	270	308	146	319	210	131	177	131	270	437	143	263	261	264	140	282	271	153
1268	chr1	158668706	158669676	13	20	57	41	53	41	87	35	24	93	98	99	52	71	61	23	40	107	19	16	38	41	28	95	155	37	26	26	12	27	67	45	31	38	100	14	15	22	41
1269	chr1	158680186	158680822	4	11	30	18	10	10	36	7	7	87	86	74	28	27	29	1	7	14	3	3	18	8	4	27	25	10	35	13	1	6	3	11	28	9	32	0	2	1	2
1270	chr1	158756444	158759816	54	96	191	112	138	120	193	195	112	484	489	387	234	207	229	160	277	370	75	119	160	134	130	381	512	61	97	120	54	97	315	153	148	235	310	41	101	121	140
1271	chr1	158776130	158777467	17	27	82	77	57	63	99	111	42	151	208	180	87	112	113	38	81	147	26	31	62	47	35	122	184	19	36	65	21	44	120	54	51	91	127	24	30	48	55
1272	chr1	158815473	158816038	10	8	29	18	13	17	26	20	11	89	89	74	34	44	54	6	12	13	6	19	18	16	12	49	78	5	8	8	6	15	25	35	31	32	48	4	17	17	35
1273	chr1	158843156	158850593	81	100	279	245	229	285	346	344	203	520	604	648	278	294	286	196	287	381	152	137	201	192	266	487	962	61	154	140	60	142	367	254	158	103	505	110	133	247	137
1274	chr1	158854647	158856928	40	20	98	106	77	120	160	194	97	209	233	250	124	139	127	65	137	125	58	43	69	66	88	167	357	37	61	62	17	40	119	86	79	34	206	37	38	90	58
1275	chr1	158857109	158884164	903	784	2131	2276	2364	3033	3945	3115	1707	3987	4189	3936	1924	2208	2355	1609	2622	2241	1534	1227	1738	1386	2370	3326	5653	693	1394	1423	586	1126	3412	2208	1734	2123	4609	1061	1008	2123	1121
1276	chr1	158888026	158890676	48	40	90	50	42	56	62	68	38	156	144	145	90	87	90	23	59	80	50	80	77	110	111	196	203	26	40	94	9	42	81	44	32	70	114	44	43	62	46
1277	chr1	158909499	158922697	248	321	707	375	356	416	498	1101	622	1121	1209	1261	444	536	523	371	639	721	437	508	380	475	679	1119	1116	234	401	438	193	331	875	406	218	198	695	245	371	514	380
1278	chr1	158942712	158949517	160	257	885	630	603	666	903	711	364	1249	1307	1054	591	545	707	272	465	1015	179	342	609	283	305	1048	1109	222	556	584	183	303	982	566	474	365	1206	173	267	381	473
1279	chr1	158962545	158962823	2	4	2	9	8	12	25	21	8	32	28	16	9	11	23	5	4	15	9	6	8	6	10	14	33	3	2	6	0	6	6	3	13	3	10	3	2	5	5
1280	chr1	158975396	158981333	82	130	390	325	364	370	525	444	275	624	710	550	335	418	421	121	210	514	131	273	280	258	236	636	814	97	255	312	90	228	484	257	162	243	419	122	268	310	244
1281	chr1	158981501	158982410	7	12	33	22	22	27	38	30	19	67	82	74	46	61	35	12	12	32	20	24	22	32	25	48	83	12	22	16	9	23	42	22	11	31	34	19	19	50	22
1282	chr1	158983107	158984154	5	8	23	13	18	20	24	32	10	57	51	52	21	28	31	6	11	33	10	14	18	18	13	43	48	1	18	18	9	16	22	16	6	12	17	1	9	20	15
1283	chr1	158984570	158985250	7	12	35	20	17	15	23	34	17	30	43	40	22	28	24	9	14	26	12	18	11	27	14	29	56	6	14	27	7	17	22	16	4	10	21	9	13	22	24
1284	chr1	158985741	158988192	32	18	62	52	54	60	57	127	77	101	139	140	65	80	88	37	61	97	49	47	41	65	68	132	205	28	41	62	25	44	103	42	27	25	74	31	48	85	36
1285	chr1	158988748	158993824	54	77	178	90	94	99	160	310	141	403	365	395	219	259	247	87	144	214	141	116	93	149	206	317	514	45	100	129	49	94	190	97	68	57	186	45	128	198	105
1286	chr1	159003941	159004998	41	40	72	83	69	77	93	121	60	136	158	137	72	92	96	69	94	108	49	75	45	66	65	64	119	32	41	58	20	51	96	28	79	70	144	31	69	78	61
1287	chr1	159073861	159074549	35	53	53	31	17	15	25	30	16	48	46	50	20	22	30	57	56	52	33	43	37	43	24	30	52	55	26	52	26	46	77	24	51	54	72	38	43	49	33
1288	chr1	159099003	159099461	20	16	13	21	16	20	11	3	15	7	14	4	7	9	8	11	15	1	2	8	12	4	9	2	12	26	7	16	19	21	58	21	34	52	71	30	15	25	13
1289	chr1	159249605	159250913	53	72	124	90	81	95	107	84	54	127	182	142	62	100	98	65	102	124	35	77	68	66	90	103	233	37	67	71	41	70	136	66	116	152	189	38	86	91	83
1290	chr1	159256966	159258134	73	131	102	60	41	44	68	94	79	99	150	116	69	61	72	127	174	83	59	118	68	85	112	87	155	105	80	112	59	89	225	93	140	110	194	58	114	117	63
1291	chr1	159274705	159275692	113	224	96	66	55	34	52	51	73	86	144	118	47	50	50	138	227	70	110	185	56	156	150	53	121	97	46	76	69	107	182	50	86	79	113	57	146	122	50
1292	chr1	159281227	159285924	196	370	419	349	238	269	361	330	219	657	784	720	341	411	400	357	496	476	204	339	271	476	343	425	633	226	225	301	197	361	589	241	393	291	609	221	392	396	314
1293	chr1	159304071	159306827	196	353	301	325	236	305	340	280	249	400	486	438	262	303	269	345	534	396	170	308	230	345	335	282	537	269	180	329	128	251	550	203	322	316	500	176	338	370	228
1294	chr1	159334502	159335414	42	57	40	31	22	9	25	13	17	35	39	54	26	23	23	38	68	38	35	45	17	54	58	21	56	38	27	31	24	41	96	30	27	49	47	36	60	55	34
1295	chr1	159353872	159354998	135	314	156	123	77	68	96	142	133	98	163	130	72	67	89	255	363	145	162	276	93	228	223	97	235	125	105	152	129	214	364	130	172	212	219	70	193	193	131
1296	chr1	159355254	159357064	19	26	38	70	49	47	64	78	53	76	111	103	44	68	54	28	61	37	29	39	28	58	40	47	92	17	20	31	20	27	60	23	26	12	56	17	46	46	32
1297	chr1	159368605	159369911	101	177	101	72	55	49	76	52	60	96	132	116	46	48	70	201	284	86	101	162	59	164	153	85	139	87	94	99	106	135	207	92	162	130	178	65	136	130	77
1298	chr1	159390028	159390913	80	171	209	130	104	110	150	163	116	182	259	226	120	129	136	163	266	238	95	155	134	180	175	174	305	109	115	111	77	166	211	92	187	165	249	71	194	145	122
1299	chr1	159395421	159396403	95	215	108	79	54	43	46	59	65	70	85	87	29	30	45	170	247	76	118	173	78	194	130	51	104	95	65	94	110	150	185	66	107	94	133	66	152	135	65
1300	chr1	159402157	159403446	118	316	128	142	97	86	115	96	107	115	192	133	73	94	77	213	329	170	143	264	98	263	192	125	201	119	104	183	108	194	316	100	173	158	220	98	175	218	110
1301	chr1	159412510	159414579	176	370	213	142	133	97	130	136	122	167	261	207	98	114	116	298	441	205	185	332	128	318	216	157	288	168	144	207	144	233	373	117	171	201	263	122	222	202	149
1302	chr1	159438314	159439370	104	216	159	113	87	70	114	75	69	116	197	156	79	98	98	181	272	169	135	154	116	212	189	96	210	135	91	116	98	168	258	73	183	158	189	90	181	159	117
1303	chr1	159462030	159462760	24	62	53	52	34	45	38	21	14	51	64	67	42	36	37	56	69	58	26	69	42	67	37	51	55	35	45	39	38	51	99	24	46	48	95	41	43	36	43
1304	chr1	159542332	159542861	36	64	49	32	29	33	37	36	31	35	68	66	23	29	32	60	93	70	54	90	28	61	72	30	40	43	27	58	29	34	103	45	34	65	88	19	39	48	36
1305	chr1	159550213	159551444	158	253	217	134	108	86	144	191	129	247	318	238	134	141	165	234	408	246	162	292	150	260	286	185	341	150	135	194	151	198	409	140	201	266	325	135	273	223	140
1306	chr1	159615469	159615886	0	2	0	0	2	0	1	4	2	1	2	2	0	1	0	3	3	1	0	1	1	11	10	2	13	28	15	24	6	22	30	7	40	52	60	0	1	2	0
1307	chr1	159626043	159626982	107	158	92	60	61	48	65	63	79	89	99	98	55	48	60	130	173	67	94	173	60	103	138	66	144	122	90	119	79	87	248	60	148	160	192	80	86	121	66
1308	chr1	159635411	159636965	132	307	200	194	126	141	192	165	139	248	295	236	122	119	181	319	517	241	189	316	167	285	260	170	295	265	143	247	165	276	457	136	346	372	368	214	351	351	155
1309	chr1	159676699	159677135	9	34	12	6	2	5	1	5	8	4	7	7	1	2	6	23	37	6	29	21	4	21	33	4	26	16	10	18	14	15	13	8	29	38	17	12	21	27	5
1310	chr1	159848655	159849296	31	30	47	18	14	29	41	25	23	51	53	25	14	23	21	29	75	44	46	51	40	37	41	27	33	31	27	47	16	26	63	25	36	37	51	24	35	25	28
1311	chr1	159942863	159944233	54	52	205	129	110	134	149	144	93	245	248	222	155	148	157	120	191	256	46	85	111	90	84	152	275	44	78	101	30	71	94	58	144	107	199	50	92	88	86
1312	chr1	159950092	159951802	9	24	59	36	36	38	44	28	17	140	132	115	55	56	56	22	40	72	11	14	24	43	8	62	54	10	16	23	2	14	30	14	21	9	45	8	14	20	30
1313	chr1	159962134	159964397	259	701	318	238	170	152	200	136	153	194	318	271	110	116	135	425	625	311	221	361	183	434	354	187	367	321	236	306	258	436	652	212	502	367	388	223	420	337	296
1314	chr1	159985832	159986884	118	285	150	132	72	49	74	77	69	98	160	103	57	55	70	219	295	108	149	219	101	192	218	102	197	159	86	117	133	220	255	90	225	162	186	104	178	169	87
1315	chr1	160001680	160003480	60	80	122	54	68	72	101	81	61	154	207	149	105	102	99	94	147	124	81	112	65	97	120	117	192	80	58	78	47	101	162	83	112	93	161	60	87	90	79
1316	chr1	160733780	160735240	98	238	130	87	72	53	88	68	82	139	197	145	76	71	94	202	268	115	106	164	81	194	164	95	139	105	102	130	110	152	256	78	143	139	175	87	181	159	87
1317	chr1	160797011	160798720	164	455	165	77	72	60	75	111	146	94	185	116	75	78	71	377	539	158	193	353	118	314	234	87	178	165	123	180	185	299	414	143	245	268	247	105	232	210	144
1318	chr1	161026395	161027708	40	44	55	51	41	40	51	43	43	13	28	37	19	12	20	43	93	75	28	86	40	37	26	53	36	35	34	59	16	43	113	50	48	67	57	35	23	31	50
1319	chr1	161557221	161559305	104	220	232	128	115	128	179	110	94	234	311	243	140	149	160	178	320	239	117	224	152	215	180	190	276	143	135	180	105	179	298	151	280	147	369	92	203	183	144
1320	chr1	163833808	163834796	34	76	53	39	22	29	31	36	30	56	88	69	46	34	44	48	63	56	20	63	38	24	28	19	54	36	32	40	33	65	118	45	29	39	97	19	47	56	31
1321	chr1	163865965	163868088	101	260	156	94	77	64	104	84	88	111	182	130	77	71	99	176	280	152	108	266	90	189	169	103	150	133	119	120	155	200	378	139	149	140	260	97	158	138	114
1322	chr1	163933813	163934904	141	359	175	124	87	79	111	101	99	106	185	144	79	77	61	278	405	196	132	290	100	259	242	115	200	181	100	174	159	177	370	155	173	168	267	112	192	165	146
1323	chr1	164003979	164005920	157	300	246	199	134	153	215	226	144	283	367	267	186	184	187	287	469	308	177	329	199	322	336	233	425	240	167	216	182	243	500	161	330	277	434	142	312	326	158
1324	chr1	164063207	164065366	169	432	232	167	119	110	184	114	106	154	234	143	82	73	98	324	499	183	230	349	145	289	265	135	245	221	139	173	182	355	464	174	420	246	261	158	294	231	172
1325	chr1	165074733	165076218	183	394	164	138	87	66	121	70	85	84	166	117	66	52	69	334	456	145	224	337	127	289	261	107	229	152	134	172	170	291	445	147	259	272	215	114	232	177	139
1326	chr1	165111475	165112650	69	188	89	55	46	47	70	66	51	89	98	102	44	58	49	136	183	98	104	164	53	143	131	70	111	73	62	94	63	122	191	73	126	105	138	74	128	107	83
1327	chr1	165211051	165211980	31	34	19	0	3	3	6	9	12	7	17	7	8	8	6	77	84	39	9	50	26	90	62	36	71	25	11	16	47	55	133	37	41	36	15	30	40	31	21
1328	chr1	165455388	165458465	222	516	369	283	194	173	278	248	245	252	358	320	148	174	169	428	635	354	293	493	189	427	355	286	391	305	238	263	207	374	580	241	431	382	462	221	385	352	243
1329	chr1	165690596	165692079	57	52	46	47	47	32	58	25	35	28	36	33	17	15	16	115	172	51	53	73	26	29	47	26	57	66	40	69	36	62	118	25	68	91	35	42	85	90	33
1330	chr1	165789195	165789845	82	161	59	71	40	25	32	32	68	16	31	22	19	14	15	189	230	65	85	180	34	125	125	27	87	68	41	73	90	139	171	46	75	67	77	48	86	68	60
1331	chr1	165863353	165869815	260	396	536	606	428	531	700	457	314	721	863	774	412	424	476	508	819	657	358	475	378	642	591	653	1021	314	299	338	284	454	765	315	753	658	904	297	509	507	326
1332	chr1	165880462	165882068	9	23	34	26	18	16	29	40	23	74	89	89	44	41	46	21	29	38	17	26	13	36	29	50	69	16	16	17	10	32	53	30	10	10	68	15	29	48	23
1333	chr1	165949960	165951127	61	130	87	67	62	39	71	35	36	49	85	78	32	29	41	152	147	78	50	88	57	112	98	42	116	111	53	72	74	96	203	45	153	104	102	68	106	108	43
1334	chr1	165956857	165958497	106	196	114	61	57	36	44	33	61	56	112	88	38	33	29	171	257	96	106	216	68	125	128	66	117	99	75	108	79	133	276	84	151	151	169	72	96	83	66
1335	chr1	166170830	166173759	254	509	320	223	148	153	202	226	247	274	394	332	179	165	187	397	611	309	241	459	250	401	419	278	513	318	217	322	214	397	740	248	515	428	418	210	471	411	261
1336	chr1	166414061	166416140	99	221	178	135	110	115	129	131	112	145	212	200	115	116	126	207	364	166	155	232	112	170	235	112	242	148	133	175	111	177	361	134	209	209	250	98	225	243	116
1337	chr1	166461072	166462737	153	329	127	131	91	90	124	141	147	122	143	140	77	70	81	247	375	142	204	282	102	250	250	114	246	154	89	154	124	190	309	119	269	207	180	104	211	191	130
1338	chr1	167280074	167281277	11	11	41	30	19	27	34	20	14	81	83	65	48	37	54	15	15	22	4	15	57	10	13	32	33	6	40	34	15	52	52	45	67	43	151	10	18	28	46
1339	chr1	167341161	167343918	196	422	237	79	71	39	70	34	54	122	209	154	71	87	76	274	398	113	168	357	200	152	131	86	102	300	251	365	395	576	1005	318	621	556	552	283	331	356	277
1340	chr1	167603055	167604682	39	64	79	39	39	40	75	64	36	153	174	145	68	89	72	58	83	73	42	74	57	68	74	66	100	53	56	58	56	56	145	58	60	96	126	46	64	68	46
1341	chr1	167720833	167722621	197	378	201	166	122	121	161	127	137	136	246	197	107	99	101	258	431	255	178	389	141	246	193	137	234	182	130	217	171	267	644	194	268	352	355	163	271	262	154
1342	chr1	167916092	167917572	7	11	56	35	32	43	50	19	9	109	103	92	67	56	56	18	23	54	8	14	47	10	7	26	23	8	28	26	11	16	38	44	24	24	109	14	20	23	38
1343	chr1	167917817	167919954	5	6	22	10	10	9	23	5	5	78	119	73	35	37	39	6	7	12	2	19	14	7	3	13	6	7	32	21	9	9	36	26	12	7	27	20	13	18	38
1344	chr1	167924790	167931840	30	42	139	99	100	111	142	47	23	452	398	418	187	187	176	28	33	156	13	48	117	38	12	160	117	53	160	120	14	48	199	86	46	41	206	22	40	63	142
1345	chr1	167946810	167948036	46	29	140	112	71	83	136	31	22	145	174	134	71	69	96	15	39	146	9	51	107	29	12	132	120	36	65	110	31	46	159	69	61	60	173	25	36	41	95
1346	chr1	168029780	168032514	115	234	203	181	131	119	168	105	84	222	324	257	129	129	161	162	343	208	130	248	148	226	205	177	241	153	132	134	132	210	347	134	215	174	355	88	216	189	160
1347	chr1	168126586	168127639	6	13	42	37	44	48	65	34	19	91	82	76	49	48	44	28	30	46	11	21	24	10	13	31	71	10	18	10	18	16	59	31	40	17	81	10	22	20	28
1348	chr1	168127988	168130915	222	362	273	171	184	132	218	197	157	282	399	309	169	159	166	372	557	250	271	400	190	334	387	188	392	207	184	239	199	332	548	211	334	364	423	173	316	327	200
1349	chr1	168309111	168311118	83	155	97	117	106	89	163	75	83	114	143	130	63	71	70	166	212	85	69	134	66	121	104	72	143	104	71	98	62	113	229	88	112	124	159	72	102	131	54
1350	chr1	168767222	168768900	143	338	303	211	153	174	237	197	130	288	367	336	148	158	176	304	492	333	203	264	202	303	321	219	460	231	178	198	161	259	458	192	324	258	373	134	318	350	201
1351	chr1	169549754	169550274	1	5	32	20	23	26	40	29	4	48	52	41	23	27	31	11	13	48	10	14	21	16	5	45	64	11	18	22	7	17	25	25	25	15	40	4	8	7	10
1352	chr1	169720481	169722812	103	187	182	156	111	140	169	223	141	206	288	249	141	166	173	159	311	190	121	174	117	192	207	160	337	102	123	137	93	142	282	138	199	180	278	91	199	240	128
1353	chr1	169832458	169834587	5	10	43	28	20	36	44	34	18	70	74	86	37	26	39	18	16	45	9	14	13	21	12	47	51	8	14	13	6	23	24	14	14	10	51	5	12	15	19
1354	chr1	169976927	169978682	156	273	204	158	122	103	156	160	158	214	297	205	120	139	139	271	361	253	182	288	116	252	306	180	350	149	131	172	122	214	383	125	172	261	239	102	225	219	113
1355	chr1	170016299	170018030	150	377	253	175	116	147	217	132	147	220	300	260	139	130	166	323	518	246	165	347	147	304	284	175	321	177	121	169	148	227	451	137	248	259	357	144	244	247	131
1356	chr1	170592981	170595745	12	19	72	102	69	99	137	48	22	128	131	104	58	65	77	21	35	63	9	22	64	24	14	44	91	14	26	29	6	12	47	48	39	16	93	8	13	12	16
1357	chr1	170625994	170628755	16	34	56	79	73	69	130	63	44	108	117	99	68	79	70	26	48	60	10	19	43	32	29	77	144	31	22	52	10	10	67	39	66	14	81	12	29	31	15
1358	chr1	170679374	170680127	46	112	72	46	35	22	31	15	26	43	64	46	27	22	19	82	96	47	46	85	29	88	65	42	69	62	57	55	56	66	115	31	93	69	91	39	80	78	49
1359	chr1	170767683	170769816	163	348	285	185	141	139	159	184	143	269	326	267	175	159	202	348	545	288	206	338	174	309	367	177	431	183	162	219	197	302	522	183	358	323	321	155	272	264	172
1360	chr1	171645409	171647393	31	40	79	95	73	144	184	78	40	122	125	120	80	92	96	53	88	77	67	38	37	64	93	86	165	32	32	50	17	50	59	29	67	95	104	51	89	93	36
1361	chr1	171647903	171652314	55	125	225	195	191	344	411	155	92	308	357	349	172	217	231	84	143	201	133	92	108	172	150	236	365	62	84	135	45	75	92	76	142	134	256	82	162	188	117
1362	chr1	171652886	171654617	13	9	37	45	61	77	114	33	21	60	70	55	37	49	52	14	25	43	12	18	35	27	19	35	84	18	28	39	13	19	52	24	29	52	82	25	60	72	31
1363	chr1	171712006	171713873	166	327	201	149	101	89	96	126	154	102	195	132	69	64	77	301	429	220	188	343	119	227	264	126	195	156	124	164	136	293	409	157	258	189	259	110	226	242	125
1364	chr1	171950255	171951457	94	186	181	108	65	75	98	143	96	179	181	146	107	81	94	189	282	177	110	217	109	163	181	129	244	111	102	130	87	138	312	115	170	183	215	82	126	149	96
1365	chr1	172059457	172061198	111	267	231	190	128	159	188	170	102	245	289	237	136	133	159	182	343	262	148	252	161	231	232	197	248	218	139	179	135	225	378	146	316	151	332	105	219	226	168
1366	chr1	172095789	172105167	422	972	1412	1436	1025	1081	1499	883	556	1955	2257	2075	973	982	1100	845	1323	1742	565	1098	897	1138	974	1497	1710	595	756	778	495	1052	1623	836	941	751	2011	522	939	1028	915
1367	chr1	172105884	172106497	21	36	46	46	24	26	21	45	24	71	69	68	40	28	40	45	84	101	37	51	26	39	49	76	106	3	2	3	12	8	49	13	53	30	47	25	48	29	24
1368	chr1	172257369	172258576	163	338	147	129	102	95	98	103	109	93	146	118	52	53	55	281	355	165	177	361	105	298	251	110	237	150	117	162	95	195	400	121	164	209	156	81	183	184	131
1369	chr1	172393008	172396421	259	537	296	32	33	39	77	177	181	340	445	361	148	212	174	459	665	280	375	472	189	550	490	252	617	284	163	272	200	299	508	205	438	413	355	158	367	385	183
1370	chr1	172440440	172440864	4	2	8	5	5	1	3	25	8	10	10	9	3	4	7	5	3	18	8	6	6	5	1	14	20	0	2	0	1	2	4	2	4	6	5	1	0	3	0
1371	chr1	173035180	173035925	11	29	25	14	19	21	32	89	59	42	59	42	31	26	27	27	46	27	15	28	20	23	30	31	60	13	11	15	11	23	36	23	28	16	36	9	28	13	12
1372	chr1	173233720	173236458	286	435	435	384	227	289	386	358	260	476	618	506	246	303	338	403	712	484	280	525	316	436	433	369	717	278	275	310	280	445	676	278	490	462	593	252	441	457	308
1373	chr1	173258665	173259972	98	248	170	138	127	119	156	173	120	209	257	200	132	124	134	231	306	204	135	212	111	246	235	164	289	145	99	159	131	213	352	116	233	189	333	111	215	183	121
1374	chr1	173427430	173429172	115	186	131	84	63	56	84	52	40	72	107	84	42	47	44	164	264	140	121	250	98	130	125	89	150	140	100	174	70	129	278	90	156	173	197	56	118	85	102
1375	chr1	174441997	174444164	331	737	462	333	222	221	300	249	207	372	542	446	268	249	229	590	831	487	436	660	317	640	560	350	655	403	288	422	349	605	1018	347	566	489	663	291	568	486	324
1376	chr1	176777687	176779500	55	164	80	41	37	38	40	34	22	86	82	72	37	38	40	40	44	26	44	99	60	113	67	48	116	87	71	89	63	108	137	43	87	84	131	44	97	73	45
1377	chr1	176960497	176962468	63	191	86	5	6	9	9	9	14	32	59	45	18	23	21	15	23	6	25	125	75	91	31	31	72	40	79	105	89	118	66	48	118	126	94	23	153	116	71
1378	chr1	177261260	177262765	73	239	117	88	59	27	44	45	54	53	91	59	30	34	35	163	237	68	133	175	66	151	129	55	139	108	92	121	95	198	236	69	166	137	119	88	99	124	99
1379	chr1	177316486	177319977	249	605	372	284	199	194	236	153	163	246	344	267	160	137	165	383	562	321	301	523	244	463	379	224	483	251	218	287	301	514	693	251	484	402	402	219	434	433	288
1380	chr1	177529133	177530459	107	213	141	69	63	56	74	58	59	55	107	66	41	46	46	123	210	111	102	257	75	155	127	77	103	111	76	133	116	167	339	103	166	151	181	68	133	109	86
1381	chr1	177530715	177531387	2	5	26	46	24	55	88	14	8	25	36	25	8	12	5	3	8	11	2	4	18	3	0	10	7	3	12	20	5	9	16	41	24	10	51	2	2	7	8
1382	chr1	177600411	177602303	78	165	113	89	73	68	101	80	72	126	150	118	66	68	85	112	199	121	87	154	67	157	130	95	146	95	64	95	79	98	181	66	120	122	126	58	169	162	91
1383	chr1	178113145	178114026	104	257	185	97	88	105	125	117	98	183	268	164	118	96	113	236	353	186	144	234	83	215	209	128	237	136	127	110	126	163	355	106	186	220	235	100	150	155	122
1384	chr1	178117273	178119923	255	567	317	221	138	141	194	254	233	274	337	325	149	160	178	499	738	356	295	437	248	460	503	228	618	336	221	306	231	377	650	220	514	448	500	255	469	463	250
1385	chr1	178189407	178191315	195	388	216	184	112	111	163	171	139	209	268	254	145	132	148	325	490	220	229	419	164	298	294	172	327	188	158	218	186	308	536	179	297	322	342	177	274	242	149
1386	chr1	178389762	178390929	139	360	148	162	108	92	115	109	148	116	184	127	83	61	65	307	410	180	158	335	107	238	183	94	197	160	119	147	154	233	335	129	227	176	239	95	186	189	114
1387	chr1	178737679	178739369	213	465	262	184	98	127	133	149	142	177	285	220	114	110	136	368	584	219	327	426	150	356	354	175	333	247	172	203	193	359	561	155	365	300	294	190	303	318	186
1388	chr1	178867401	178868426	126	219	136	125	68	52	85	72	99	55	96	91	38	32	38	176	244	103	108	186	71	166	135	79	134	99	82	108	85	197	246	103	179	164	139	80	121	119	100
1389	chr1	179147484	179149325	77	137	79	54	27	22	35	6	4	10	20	24	5	10	12	11	9	4	17	77	50	49	6	11	30	77	108	99	134	212	240	102	224	188	159	76	115	101	103
1390	chr1	179189173	179190454	43	100	49	30	12	9	21	11	20	12	20	29	10	11	9	62	83	24	35	67	20	71	46	18	31	49	41	44	72	86	78	26	90	67	77	19	72	55	34
1391	chr1	179257534	179259219	124	268	142	124	89	66	98	94	81	96	163	129	61	62	65	238	327	123	180	234	94	213	208	103	197	142	117	142	116	189	335	115	172	197	164	109	196	145	124
1392	chr1	179268829	179270365	40	65	117	103	53	95	128	126	52	202	218	216	117	118	135	65	106	183	45	73	86	84	72	146	203	38	65	76	33	58	156	74	104	88	208	30	66	67	73
1393	chr1	179297589	179299217	65	65	103	81	49	68	101	103	58	166	183	176	97	110	132	84	115	147	46	66	71	82	93	125	240	60	57	72	33	68	132	68	77	71	132	44	116	155	91
1394	chr1	179323719	179333343	737	1656	1239	1279	925	985	1341	986	939	1390	1806	1501	858	900	922	1416	2146	1280	816	1198	726	1306	1432	1104	1979	993	735	1072	715	1139	2096	940	1553	1368	1953	770	1677	1776	977
1395	chr1	179334891	179336904	19	46	68	138	47	70	117	63	33	151	204	176	99	112	120	26	66	70	30	28	55	43	23	92	110	28	37	40	24	45	89	54	51	40	125	26	40	52	57
1396	chr1	179339593	179341537	56	124	93	65	48	21	37	34	34	82	119	71	43	36	41	100	105	45	63	96	43	101	63	55	68	53	48	66	62	86	155	40	93	96	108	60	102	108	67
1397	chr1	179363515	179366673	103	206	227	234	137	135	162	102	66	241	293	213	118	141	144	123	137	155	80	156	148	178	124	168	224	208	149	243	130	185	388	152	233	227	375	131	322	269	192
1398	chr1	179366884	179368002	36	69	48	71	51	29	52	33	16	66	84	80	37	56	35	64	85	54	40	59	43	84	71	53	102	81	51	72	34	62	116	31	78	53	98	57	124	102	49
1399	chr1	179368771	179370042	14	26	22	62	36	34	66	12	6	35	59	63	33	30	35	18	16	9	14	14	19	30	24	34	34	33	19	36	11	24	47	17	44	25	61	24	55	52	22
1400	chr1	179370279	179372069	65	54	62	116	73	81	102	53	45	108	111	103	73	95	92	47	66	71	24	58	36	45	57	89	111	49	63	71	40	63	164	53	73	94	140	72	94	121	70
1401	chr1	179718054	179718851	30	50	39	72	56	47	65	32	26	16	27	18	5	16	15	13	14	5	27	27	13	117	126	72	59	22	20	26	38	51	157	37	74	61	84	19	46	31	25
1402	chr1	179720477	179722219	26	47	36	133	112	105	122	51	41	11	21	23	16	14	8	52	84	25	8	18	15	105	142	105	112	19	15	21	28	50	93	50	115	120	166	31	63	49	28
1403	chr1	180264757	180266113	92	221	135	98	75	65	81	88	87	95	161	119	69	61	73	217	299	152	125	253	75	167	150	104	142	121	84	120	113	149	328	119	139	166	223	92	142	124	130
1404	chr1	180626435	180628367	141	346	199	65	58	57	78	133	186	113	189	173	67	69	61	517	754	294	260	231	74	283	350	180	276	201	67	103	111	228	268	76	198	236	151	149	243	180	164
1405	chr1	180833054	180840754	360	955	569	745	418	471	627	368	286	621	792	726	388	381	423	770	1142	606	293	554	291	493	578	446	690	390	306	595	395	597	835	434	531	458	995	355	439	551	344
1406	chr1	180850096	180852864	112	225	145	145	77	120	125	96	60	163	164	155	107	107	133	217	370	144	125	78	83	168	197	79	282	136	88	102	113	181	164	81	245	190	252	135	183	241	91
1407	chr1	181025052	181025841	95	254	114	118	81	49	94	44	57	38	105	56	36	26	35	292	402	86	99	147	54	167	162	66	120	101	58	143	104	187	228	71	186	274	139	78	89	93	51
1408	chr1	181074742	181076086	241	443	268	183	159	130	147	229	195	171	281	212	115	109	112	370	606	256	271	456	176	375	357	176	343	275	215	247	227	395	561	190	386	354	382	198	304	322	213
1409	chr1	181124036	181126476	13	36	49	77	44	54	87	51	27	126	129	137	53	49	75	18	55	72	28	31	34	39	21	72	110	13	24	20	6	31	64	37	19	9	76	11	26	46	29
1410	chr1	181258033	181260099	80	213	101	74	65	38	60	33	55	35	85	52	32	31	20	142	154	58	174	184	70	155	94	50	135	61	67	99	76	144	162	53	171	195	142	73	117	134	94
1411	chr1	181284408	181284780	5	9	23	9	8	7	17	3	3	31	34	24	13	15	10	4	5	19	3	4	11	9	2	23	11	2	9	6	3	6	25	12	4	6	30	3	3	6	9
1412	chr1	181705835	181709243	196	435	326	240	170	176	225	148	171	259	342	292	155	161	175	352	564	322	228	384	199	359	334	234	441	257	205	304	171	350	540	188	359	366	393	192	316	331	261
1413	chr1	181789051	181790206	5	5	18	29	31	48	41	17	11	22	37	25	8	4	8	13	22	21	3	9	11	12	13	20	32	8	7	17	11	14	25	8	15	3	31	11	17	23	16
1414	chr1	181802391	181803794	18	23	23	50	34	28	43	28	22	27	31	21	14	13	14	21	21	17	16	15	8	33	30	15	40	20	14	25	19	34	42	9	20	13	38	25	55	75	22
1415	chr1	181824498	181827190	56	64	111	279	229	246	351	120	58	107	138	132	70	87	71	126	207	209	65	102	77	103	127	134	282	90	83	108	57	129	274	89	153	163	260	84	156	192	131
1416	chr1	181839062	181841503	12	16	20	142	136	167	204	33	25	17	14	20	8	19	25	90	129	163	17	14	9	9	33	22	49	21	14	42	27	37	54	30	31	55	92	43	72	61	42
1417	chr1	181860487	181861753	4	7	19	28	21	33	42	23	12	46	53	67	23	22	20	6	25	39	6	9	9	22	14	22	34	6	19	4	5	13	20	22	8	5	42	11	6	28	15
1418	chr1	181868374	181872280	174	392	333	283	221	263	397	174	136	379	460	433	227	214	249	404	609	457	147	281	189	352	319	324	398	232	213	216	178	260	560	206	303	300	514	164	327	360	238
1419	chr1	182040608	182041654	58	126	73	37	35	46	47	52	41	55	73	75	34	42	50	168	196	47	129	118	67	120	145	39	123	37	34	31	92	148	153	66	125	118	108	61	116	111	67
1420	chr1	182077306	182078902	7	23	65	55	33	43	65	64	19	83	86	74	62	63	61	23	47	59	22	16	36	38	15	60	129	26	37	39	16	25	55	39	47	45	103	23	27	41	30
1421	chr1	182132208	182135682	15	33	62	45	72	78	100	66	33	255	233	229	123	125	154	35	63	71	26	46	88	24	22	57	67	49	62	39	36	71	78	79	88	31	195	34	114	95	119
1422	chr1	182166809	182167523	3	10	11	8	3	9	6	14	5	30	29	25	14	18	14	12	17	7	8	9	11	16	18	8	16	6	6	2	10	12	16	8	15	5	26	8	27	38	18
1423	chr1	182286692	182288285	121	241	157	149	90	82	116	69	53	114	141	137	73	64	77	222	361	163	169	242	131	213	214	83	204	124	115	139	125	275	326	88	254	258	225	128	210	167	120
1424	chr1	182989400	182991742	155	351	195	126	82	67	105	94	102	132	202	166	83	91	100	324	461	212	181	323	112	324	249	123	264	138	115	199	175	287	475	120	181	218	252	132	242	214	129
1425	chr1	183208754	183210856	81	147	82	100	52	63	91	99	109	95	124	128	68	74	85	239	360	117	162	93	47	148	211	74	281	105	50	63	103	144	155	80	204	177	169	127	256	284	82
1426	chr1	183280766	183282123	48	135	55	32	28	20	28	36	35	27	62	40	22	21	17	103	166	41	92	114	29	115	105	34	69	35	40	66	57	103	98	37	75	86	63	62	87	80	53
1427	chr1	183391535	183393787	158	310	225	134	108	134	130	148	145	226	272	235	127	130	148	225	389	251	121	289	127	252	254	165	372	161	143	182	118	207	393	166	256	262	312	144	286	265	152
1428	chr1	183551413	183554199	312	586	363	218	165	158	201	204	236	190	377	277	131	139	149	543	810	283	335	437	218	387	411	172	482	286	210	363	251	417	575	215	493	457	484	230	378	397	221
1429	chr1	184610186	184612086	164	342	184	164	119	101	147	155	103	198	275	214	120	109	123	293	391	216	159	303	125	282	252	132	279	167	127	191	133	244	421	161	229	239	272	127	227	211	155
1430	chr1	184915838	184916931	22	19	16	1	2	1	3	5	7	18	23	25	13	14	20	38	56	14	26	29	17	25	62	30	101	47	8	10	12	16	133	14	40	51	56	48	61	104	40
1431	chr1	185308812	185309306	0	3	2	17	6	16	21	12	13	22	12	8	5	14	6	19	13	22	0	5	5	11	13	16	13	14	4	14	7	14	34	4	4	2	3	11	8	10	4
1432	chr1	190785779	190787572	11	13	55	77	93	119	150	38	24	67	69	67	48	48	53	16	34	60	9	11	31	21	8	29	74	21	33	29	8	28	70	34	54	49	140	11	12	33	24
1433	chr1	190787909	190790026	16	12	45	74	102	118	190	30	17	60	61	69	38	55	58	23	33	61	10	10	29	9	9	48	78	26	28	31	19	32	58	49	44	66	143	20	8	26	26
1434	chr1	190790388	190791694	4	3	10	31	37	48	64	13	8	14	10	16	11	8	13	8	10	12	2	2	6	3	2	2	13	6	5	2	6	9	24	11	14	13	34	7	1	7	8
1435	chr1	190794573	190795751	6	6	22	46	44	25	56	21	5	14	16	24	14	14	11	16	17	28	7	1	9	1	2	13	20	6	6	5	8	16	26	21	26	27	39	10	1	17	13
1436	chr1	190811029	190817616	341	251	1171	1017	951	1945	2962	1223	583	1194	1181	1152	794	839	993	384	593	966	277	288	639	131	161	936	1351	434	660	835	227	472	1375	945	864	1157	2709	285	163	733	462
1437	chr1	191042918	191045525	314	312	267	22	23	38	63	131	102	97	139	134	84	105	107	139	176	98	133	266	185	158	185	108	257	378	120	234	254	294	1082	163	534	605	566	265	331	465	172
1438	chr1	191294022	191296096	263	535	296	210	166	150	233	298	246	238	359	289	147	172	195	451	699	314	273	508	222	438	399	216	507	349	182	276	233	423	632	233	502	346	396	211	440	460	244
1439	chr1	191340142	191341604	106	274	109	104	65	50	65	53	67	79	128	98	54	41	37	191	271	102	153	307	89	204	185	75	176	97	70	117	111	195	322	97	160	180	139	91	137	135	112
1440	chr1	191356982	191358593	215	454	222	180	127	97	151	115	147	155	246	213	128	93	100	362	476	195	197	343	148	357	345	179	356	220	174	210	182	275	512	155	279	327	352	184	295	264	187
1441	chr1	195381745	195383041	45	95	94	87	58	46	96	36	24	89	112	95	62	65	58	73	110	98	52	107	63	108	63	90	78	59	59	40	40	79	141	68	107	61	175	32	77	58	51
1442	chr1	195436212	195438084	143	262	221	142	97	92	157	120	95	217	289	206	132	129	117	188	299	170	103	256	104	195	224	166	295	135	129	170	126	199	361	161	239	238	302	121	214	183	141
1443	chr1	196010508	196012082	43	80	39	12	12	7	5	35	45	35	49	52	30	14	19	45	54	24	103	92	26	79	81	19	83	27	2	10	11	42	19	6	10	60	12	9	55	45	15
1444	chr1	196138037	196139127	59	137	73	64	51	34	47	42	58	45	106	86	42	30	35	149	235	127	88	193	39	166	176	77	149	55	43	63	44	61	197	35	46	68	54	43	101	89	72
1445	chr1	196391994	196395798	246	502	321	254	184	159	216	199	201	371	532	381	218	196	241	470	625	340	276	486	223	433	416	219	451	252	251	290	205	353	665	249	378	344	499	178	379	305	235
1446	chr1	196833325	196835116	13	26	57	120	90	92	142	71	38	94	126	85	48	57	47	45	81	103	35	30	37	38	14	47	92	24	53	55	9	36	30	27	28	40	77	22	73	67	70
1447	chr1	196856190	196858295	37	77	164	121	95	97	128	98	48	227	251	199	111	128	134	73	140	215	51	73	99	80	63	176	207	52	61	88	38	94	91	66	73	75	207	31	74	61	111
1448	chr1	197172381	197173590	27	32	109	133	79	89	92	102	46	156	156	109	70	66	88	8	24	36	21	58	114	16	36	51	55	45	62	68	48	80	219	109	169	138	266	34	38	68	71
1449	chr1	198388850	198389543	4	4	16	20	27	24	49	17	15	19	22	24	15	16	19	22	22	31	2	4	8	8	8	12	22	4	5	6	6	7	9	8	11	4	37	2	2	12	10
1450	chr1	198389764	198390374	5	4	17	37	20	37	41	33	16	38	41	53	28	21	25	23	40	38	5	5	14	9	7	24	28	4	6	11	5	11	12	14	7	5	27	5	4	5	9
1451	chr1	198537950	198538554	10	42	23	7	3	3	7	7	4	28	37	23	20	13	16	28	42	12	3	5	14	17	31	18	31	15	4	3	9	25	27	6	14	22	13	22	26	30	10
1452	chr1	198644918	198646669	79	169	92	67	63	45	85	69	74	87	148	129	67	69	76	166	227	112	86	174	73	157	147	90	121	85	67	87	92	128	235	101	95	121	153	71	110	99	84
1453	chr1	198856090	198857041	39	187	73	56	42	31	47	19	18	47	84	71	23	26	30	93	151	77	49	129	57	107	51	41	45	73	56	54	45	74	172	46	93	59	91	45	64	49	41
1454	chr1	198904474	198906885	215	427	292	185	145	120	181	110	121	219	309	233	116	103	128	329	472	224	236	378	198	394	356	212	330	259	191	272	260	402	537	205	350	305	359	199	364	331	235
1455	chr1	198974077	198976016	92	196	107	94	51	36	64	51	71	107	131	108	56	49	74	226	327	139	100	206	55	158	136	94	170	130	87	124	85	136	274	91	163	167	161	91	115	130	98
1456	chr1	199102162	199103546	22	32	53	45	40	53	70	23	17	60	67	64	35	25	45	40	73	80	24	25	27	35	29	42	71	27	26	40	22	32	71	13	36	25	93	19	34	37	15
1457	chr1	199105095	199106943	39	77	94	83	51	80	107	29	18	79	104	71	47	41	66	165	231	298	44	50	51	47	28	46	64	48	43	90	20	39	144	36	74	60	174	35	50	75	56
1458	chr1	199107696	199111950	40	87	49	24	16	26	35	24	6	14	30	22	13	7	14	242	411	269	20	15	13	25	11	13	22	25	13	19	15	26	42	10	46	38	76	33	50	43	21
1459	chr1	199122644	199125127	89	122	138	140	87	114	150	41	32	55	85	68	26	35	58	189	246	130	89	75	57	50	70	38	109	118	55	102	61	86	225	52	138	145	251	103	151	140	88
1460	chr1	199126376	199128873	73	160	119	72	73	75	96	22	24	42	59	51	28	30	33	51	61	32	51	63	64	57	47	42	56	93	68	94	92	122	214	87	151	130	224	72	67	65	46
1461	chr1	199144380	199146173	14	19	51	115	49	85	115	10	8	23	25	28	11	5	17	5	5	5	6	13	25	8	5	14	14	31	32	35	28	44	89	33	54	37	137	11	10	17	23
1462	chr1	199255014	199259875	165	271	216	242	163	124	189	160	131	166	203	171	115	120	117	298	441	278	151	331	141	274	189	177	291	146	119	181	166	239	417	127	185	214	255	102	169	179	120
1463	chr1	199406174	199407566	35	57	28	23	15	18	18	20	17	15	12	23	15	17	19	67	88	24	70	116	33	42	51	24	68	61	33	65	22	53	119	27	86	129	107	22	44	55	25
1464	chr1	199640397	199643478	31	34	42	163	126	107	136	29	20	14	21	13	11	11	16	15	22	17	9	16	14	12	6	4	16	39	18	24	27	27	178	30	91	74	147	52	58	95	56
1465	chr1	199703982	199705454	111	135	107	107	45	29	55	34	54	46	79	59	36	21	29	70	107	35	70	146	39	68	87	37	49	63	72	114	89	148	324	103	87	206	97	157	126	115	103
1466	chr1	199715939	199716869	16	31	33	51	38	33	34	35	19	29	54	34	14	20	16	51	64	41	23	77	26	40	24	28	38	46	37	52	22	33	110	43	39	53	72	24	36	34	50
1467	chr1	199742140	199743417	175	415	186	178	123	70	128	72	76	55	121	82	49	40	46	261	373	133	195	445	127	241	211	96	152	168	113	177	164	250	401	108	235	230	236	114	230	207	141
1468	chr1	200064625	200065667	118	256	159	85	58	54	71	74	87	54	116	93	33	37	56	246	305	99	155	209	113	213	193	68	129	127	114	129	143	206	250	90	276	159	166	111	186	155	118
1469	chr1	200190802	200192185	177	354	242	173	118	148	163	158	133	198	277	207	126	109	171	307	449	264	190	321	144	310	275	158	376	213	154	202	154	259	539	178	312	294	366	160	275	273	194
1470	chr1	200218080	200219389	85	198	78	71	57	33	56	40	47	48	50	56	34	19	41	186	200	72	94	201	63	170	138	51	118	88	80	101	113	185	275	85	147	136	142	75	123	96	90
1471	chr1	200245594	200246632	39	64	36	108	70	65	93	8	7	10	12	17	7	4	13	26	45	17	12	32	26	15	8	10	22	127	56	92	71	94	235	38	118	159	178	94	222	220	133
1472	chr1	200379204	200384500	135	232	185	197	117	103	148	127	100	191	207	219	102	106	104	194	303	138	146	218	111	192	158	117	239	125	108	149	94	201	317	110	190	185	214	117	182	215	110
1473	chr1	200394631	200398399	177	309	267	336	229	191	251	259	225	209	317	259	117	122	148	283	464	243	186	309	120	259	254	163	284	222	149	176	128	262	485	136	245	260	353	175	220	181	146
1474	chr1	200400180	200400869	6	14	22	48	28	37	49	13	16	21	32	27	14	19	22	19	35	17	14	10	7	22	21	15	28	19	8	11	10	8	41	7	31	22	35	14	21	20	15
1475	chr1	200401114	200401799	2	3	4	29	23	9	31	10	5	6	17	12	12	3	4	12	7	5	4	5	1	4	11	6	10	3	1	0	1	2	9	0	8	1	9	4	12	10	8
1476	chr1	200577337	200578300	70	185	185	185	91	107	150	100	60	177	219	170	100	94	110	109	209	190	68	243	97	134	85	117	120	114	96	105	97	133	297	101	187	111	303	69	133	111	100
1477	chr1	200957415	200959048	9	9	12	8	9	4	8	21	7	79	57	81	27	25	30	3	5	4	2	3	3	5	6	22	24	0	1	7	0	5	12	3	3	1	10	2	2	9	5
1478	chr1	201042577	201043526	21	53	18	18	10	10	9	7	14	29	38	38	13	10	19	14	20	2	41	41	13	48	42	18	29	8	7	12	20	24	20	12	21	14	10	16	28	16	5
1479	chr1	201043875	201044344	79	126	62	51	35	33	39	56	74	64	111	87	40	42	42	39	47	29	92	78	40	128	145	64	145	17	37	68	23	50	67	27	36	83	34	40	42	75	24
1480	chr1	201046274	201047415	56	173	61	28	23	20	31	40	53	72	126	108	40	38	36	82	106	25	113	109	42	123	183	41	129	34	29	47	31	85	85	26	33	68	40	30	47	57	31
1481	chr1	201124084	201125389	258	644	313	278	164	158	179	128	148	208	312	251	129	127	128	376	636	275	240	641	215	511	393	191	385	279	203	269	293	452	827	238	404	363	489	198	326	313	217
1482	chr1	201162330	201163353	177	509	289	186	121	98	130	108	101	181	224	176	98	88	100	370	515	184	215	529	150	379	307	164	245	235	189	235	213	372	683	193	293	344	298	152	296	216	154
1483	chr1	201193518	201194738	139	331	110	73	49	28	54	65	59	67	101	79	56	41	43	265	354	98	169	244	71	225	198	75	131	136	99	122	150	227	299	89	182	185	137	110	187	135	128
1484	chr1	201202642	201203585	45	100	68	27	26	27	26	35	35	34	59	43	22	26	23	72	106	49	59	112	27	42	37	33	60	46	39	55	46	72	133	48	53	63	70	28	50	48	30
1485	chr1	201241500	201243729	226	336	341	245	175	174	284	310	221	262	411	344	195	230	209	360	526	414	248	459	203	348	291	242	453	210	196	252	192	325	563	200	325	286	390	180	289	241	189
1486	chr1	201261632	201262505	33	95	30	27	19	23	37	29	40	33	54	49	21	23	22	58	85	21	32	45	17	31	35	19	43	29	18	39	32	49	43	25	36	48	32	13	36	35	18
1487	chr1	201508751	201510608	105	203	123	87	59	54	68	81	69	139	185	156	64	89	85	170	224	153	75	174	89	174	134	100	199	82	104	123	63	99	191	70	93	117	140	63	118	92	68
1488	chr1	201521875	201524455	126	147	207	158	130	128	172	145	89	204	229	240	128	136	123	180	247	305	127	185	136	152	173	188	316	131	135	222	84	166	247	95	160	181	270	103	216	240	115
1489	chr1	201524847	201527163	253	285	335	266	205	223	314	281	251	348	412	376	191	211	240	355	603	431	232	285	207	322	334	271	595	230	177	306	152	235	402	132	301	340	377	132	335	455	202
1490	chr1	201539632	201548057	916	2046	1811	1246	986	863	1157	1177	1092	2526	3147	2575	1106	1273	1225	1455	2235	2097	1103	1769	1124	2164	1500	2300	2279	831	1283	1728	798	1351	2582	1004	975	1803	2161	735	1246	1469	1167
1491	chr1	201559752	201564308	223	429	395	365	265	288	413	229	172	450	568	471	251	270	313	347	543	466	200	308	287	487	339	424	634	299	254	434	211	304	656	210	307	380	499	219	399	374	248
1492	chr1	201990108	201990799	6	13	29	10	14	19	18	14	13	86	105	94	49	46	64	18	23	81	9	27	38	12	8	52	44	11	12	17	9	23	41	28	18	30	60	5	13	12	27
1493	chr1	202000047	202002057	25	51	110	49	40	45	62	136	68	333	446	360	181	181	221	118	220	324	92	124	108	104	140	208	409	26	13	18	50	70	148	70	163	181	221	22	194	147	105
1494	chr1	202011239	202014585	12	15	25	9	15	8	21	26	9	145	185	169	66	84	67	16	26	70	21	31	26	32	14	66	58	6	9	3	5	16	32	23	19	14	37	9	11	26	15
1495	chr1	202096943	202098180	64	112	107	66	44	75	74	64	65	94	126	120	60	60	81	121	184	109	74	113	68	106	109	66	136	100	50	77	57	105	180	55	138	98	170	66	138	126	73
1496	chr1	202636566	202637571	2	9	13	23	16	27	26	13	11	31	44	51	25	30	15	11	10	21	5	7	6	9	7	25	20	9	9	9	5	8	19	6	6	3	23	0	4	11	12
1497	chr1	202645751	202648189	198	429	246	172	141	125	176	174	159	192	266	246	104	113	119	316	550	269	255	328	158	288	289	152	309	216	140	205	201	274	408	124	280	265	319	143	286	295	153
1498	chr1	202701627	202702179	12	20	26	7	9	7	13	15	12	20	20	24	7	8	13	23	39	26	27	31	15	14	33	12	34	18	12	21	4	13	48	4	35	25	51	10	19	28	7
1499	chr1	202729597	202731831	188	310	178	146	104	79	127	91	94	139	224	157	76	90	87	273	414	164	183	381	117	195	214	112	248	155	122	189	128	253	466	160	207	235	240	97	152	159	123
1500	chr1	202751280	202753227	119	231	225	184	117	151	184	190	135	194	266	198	128	125	141	204	388	237	180	191	149	247	216	179	361	133	143	171	133	207	289	120	284	275	336	104	198	207	131
1501	chr1	203357330	203358704	133	313	200	154	107	114	190	145	139	200	242	206	132	157	151	300	467	247	155	251	127	311	341	157	364	215	130	201	128	233	395	153	298	322	341	140	321	285	137
1502	chr1	203446540	203448039	46	105	59	87	39	48	51	53	58	71	105	80	49	38	48	202	246	113	120	106	22	194	178	75	162	112	47	73	34	78	101	28	42	75	40	46	89	76	38
1503	chr1	203676348	203677223	5	14	10	47	34	30	23	8	13	14	20	10	4	11	8	25	39	28	3	16	14	40	23	40	59	18	4	11	7	21	37	16	27	18	32	13	18	22	11
1504	chr1	203866051	203868550	287	592	324	273	189	163	230	183	206	230	342	265	113	141	138	507	724	274	366	475	260	473	367	202	451	334	225	356	284	457	676	232	589	474	464	243	398	376	238
1505	chr1	203904071	203906131	26	54	52	116	72	85	136	27	34	46	75	47	25	44	41	46	75	29	24	35	43	34	46	58	55	68	40	53	30	43	93	59	163	104	172	67	81	101	62
1506	chr1	203983963	203986644	148	311	246	166	127	127	179	125	109	172	200	192	102	104	101	279	412	168	213	236	143	287	278	139	283	189	144	193	174	301	315	121	368	235	298	152	311	266	182
1507	chr1	204009787	204011349	43	58	49	139	119	133	151	41	35	49	62	46	23	39	39	68	95	80	39	84	43	98	103	85	189	55	70	66	40	67	143	53	86	103	186	52	81	111	83
1508	chr1	204048473	204049292	19	30	15	20	30	11	16	5	9	1	2	5	2	1	0	23	26	14	24	91	29	12	7	9	9	24	19	29	15	27	63	7	11	19	27	7	13	21	19
1509	chr1	204085686	204086147	2	8	4	0	0	0	0	4	2	1	1	1	3	0	0	0	0	1	11	31	23	5	8	14	14	20	4	7	6	5	21	7	11	17	35	1	2	2	2
1510	chr1	204436097	204441504	35	39	138	98	54	94	104	147	58	73	62	69	34	33	38	58	128	338	14	46	56	51	8	80	83	43	69	65	25	53	128	42	46	42	123	57	324	319	294
1511	chr1	204441661	204442693	6	3	30	29	13	19	27	32	24	17	9	22	8	7	2	25	29	79	4	12	19	21	7	28	17	9	18	19	10	12	35	8	12	7	28	13	78	95	78
1512	chr1	204444390	204445746	17	13	33	48	20	44	29	76	41	17	13	25	5	5	7	20	47	85	3	18	19	26	4	24	29	14	28	32	11	20	35	26	16	19	36	25	117	116	92
1513	chr1	204445978	204449228	29	43	69	79	44	52	88	108	60	46	49	45	29	22	25	48	84	176	8	33	29	58	10	58	70	21	58	65	25	31	84	35	21	28	92	36	245	210	260
1514	chr1	204465841	204466452	5	3	7	6	3	9	8	20	10	6	6	8	7	5	10	9	13	28	3	6	12	4	1	1	3	10	18	18	3	2	17	3	2	9	15	3	51	31	45
1515	chr1	204471824	204473702	7	8	24	5	6	7	24	24	8	10	19	12	9	5	12	14	13	89	1	24	26	10	0	13	12	18	24	31	0	5	21	12	10	14	30	5	92	87	121
1516	chr1	204495431	204495812	9	11	11	18	12	17	25	16	14	5	9	4	2	4	4	9	14	27	3	11	12	9	3	18	22	10	12	20	2	2	21	2	9	11	23	11	23	20	24
1517	chr1	204709329	204711946	116	169	160	232	195	165	227	130	93	195	298	247	146	120	163	144	280	182	93	197	123	200	216	190	294	135	102	178	102	152	371	142	162	175	329	93	176	148	115
1518	chr1	204741843	204744911	7	32	66	120	98	84	106	54	22	120	141	153	72	73	70	25	46	52	15	27	18	33	29	105	68	21	35	36	20	31	68	33	26	26	132	20	33	43	42
1519	chr1	204746151	204748020	84	155	61	191	149	89	114	48	64	46	66	73	26	33	23	167	278	80	94	86	41	95	160	65	118	126	49	104	96	130	192	62	130	178	97	82	89	103	56
1520	chr1	204796066	204800689	181	322	268	215	156	175	241	188	153	251	345	261	143	123	157	287	438	290	160	298	193	226	271	237	456	203	188	262	168	267	448	182	304	251	372	129	210	213	201
1521	chr1	204802847	204804209	20	26	42	76	70	59	80	55	30	77	101	107	57	49	69	33	54	88	28	64	45	47	44	61	129	29	29	52	20	37	76	41	44	41	82	32	44	58	31
1522	chr1	204819744	204820739	42	33	40	32	29	52	60	39	32	57	66	72	30	33	42	51	66	40	30	36	26	35	51	35	120	24	20	37	26	36	67	13	31	44	64	13	57	71	22
1523	chr1	204849258	204850158	5	8	27	58	27	44	68	54	21	55	58	59	47	40	46	27	36	36	11	14	24	11	9	27	53	9	12	17	9	12	25	18	23	24	47	1	19	28	15
1524	chr1	204851816	204852850	111	267	156	117	89	66	99	71	74	99	155	110	43	54	57	221	282	132	144	172	96	224	190	99	201	147	78	141	121	184	265	83	236	219	166	99	174	191	95
1525	chr1	204874396	204875910	136	324	174	137	112	85	99	83	84	99	176	111	77	67	71	278	443	168	154	347	97	216	193	90	152	120	110	127	131	174	427	131	138	135	206	94	170	158	122
1526	chr1	204924540	204926778	81	152	146	61	47	47	63	63	69	76	107	87	40	52	44	123	183	93	91	139	86	129	98	105	154	73	75	148	78	121	132	83	113	103	127	49	126	117	78
1527	chr1	204978907	204980553	47	76	164	59	50	57	66	92	58	266	258	266	147	160	174	60	96	185	29	79	121	117	78	230	298	49	59	88	60	78	184	67	91	47	154	45	101	99	103
1528	chr1	204981012	204981810	7	15	31	14	9	6	12	29	15	55	61	60	22	37	33	8	13	17	7	22	28	25	21	35	28	18	14	29	12	13	31	8	12	18	32	10	34	21	17
1529	chr1	205008046	205013491	186	174	453	90	90	121	149	211	130	877	1031	806	444	508	576	77	125	186	42	178	369	220	159	528	807	230	164	256	95	169	645	147	202	206	545	168	313	452	394
1530	chr1	205013763	205014614	19	17	16	4	3	9	7	6	4	48	65	45	24	33	31	7	12	14	2	16	17	16	8	18	57	16	6	11	7	4	36	4	8	12	16	13	31	23	14
1531	chr1	205030264	205032262	23	26	65	41	26	26	40	44	28	142	136	94	72	89	85	20	37	53	7	24	56	28	27	63	119	20	40	49	7	24	61	24	29	16	56	18	47	76	65
1532	chr1	205139617	205146464	50	97	148	112	82	87	129	322	166	610	609	616	282	332	336	98	154	215	134	144	108	260	184	368	372	33	62	91	59	133	104	97	83	63	173	76	169	131	101
1533	chr1	205151542	205154017	19	27	52	52	41	37	51	84	42	164	159	209	68	71	90	24	34	78	22	43	32	65	46	103	133	14	26	28	15	29	27	33	18	13	59	27	31	47	40
1534	chr1	205154617	205165857	256	453	529	460	370	407	489	1014	584	1247	1323	1283	619	696	636	409	611	652	445	528	411	640	608	851	1585	201	310	346	211	458	412	260	387	379	740	289	571	596	432
1535	chr1	205169549	205171987	84	191	130	110	95	81	117	144	97	265	302	288	156	170	167	142	197	163	136	146	102	249	215	266	444	89	100	150	87	153	183	89	136	95	213	121	271	276	180
1536	chr1	205290473	205291304	47	135	68	41	44	37	45	26	26	55	92	81	31	23	37	117	158	62	49	110	43	91	78	33	55	52	57	53	56	84	186	47	90	94	109	56	89	72	43
1537	chr1	205292700	205293543	69	138	58	58	52	35	50	21	30	78	105	88	44	43	52	147	189	87	77	224	47	87	66	60	80	82	47	87	61	78	238	60	82	131	98	56	89	89	42
1538	chr1	205560777	205562475	185	349	166	99	91	106	141	124	160	101	134	117	69	76	77	308	393	124	276	319	122	175	198	76	215	206	89	212	124	220	358	111	258	282	222	94	254	248	114
1539	chr1	205663023	205664212	4	5	7	13	21	25	56	17	10	2	9	5	1	1	5	33	62	11	48	30	5	7	0	2	7	3	3	1	2	6	7	3	12	19	47	5	22	14	10
1540	chr1	205694010	205696498	154	306	297	18	51	78	103	168	133	159	223	170	107	101	106	235	363	113	396	291	118	112	98	126	177	169	161	174	65	108	251	119	206	181	321	139	115	147	105
1541	chr1	205991514	205992875	155	290	217	140	126	112	156	93	120	171	272	184	119	119	120	273	388	224	179	391	161	257	256	173	265	186	142	189	129	213	415	137	278	237	273	134	222	193	160
1542	chr1	206038882	206041223	8	30	34	48	41	80	98	54	25	68	93	82	39	46	41	28	47	49	18	22	25	39	28	43	64	15	24	26	7	23	51	21	19	16	61	15	47	53	38
1543	chr1	206060269	206066644	192	213	356	402	316	459	578	636	396	612	780	649	350	444	401	465	752	791	290	395	349	244	382	498	840	197	215	348	169	281	663	262	334	484	572	190	533	636	349
1544	chr1	206108185	206109543	42	114	63	26	25	16	18	46	49	18	38	30	19	11	14	101	109	20	85	88	37	85	86	25	48	45	39	52	56	81	100	30	96	88	71	73	47	46	20
1545	chr1	206202878	206203969	74	122	76	79	63	45	54	53	66	35	76	54	17	20	22	122	200	61	134	138	63	168	185	58	141	112	64	82	98	139	262	54	135	162	99	83	111	75	70
1546	chr1	206427041	206428492	4	9	26	5	6	14	20	19	9	197	191	166	81	91	95	39	51	84	2	0	6	41	18	81	108	14	6	14	10	11	17	20	20	12	25	4	21	19	14
1547	chr1	206428706	206429897	4	12	20	3	4	7	8	11	6	115	128	113	58	62	69	11	26	44	0	2	1	21	7	49	64	2	5	5	1	3	17	7	4	5	13	0	0	1	6
1548	chr1	207995602	207998529	84	81	199	182	110	147	136	94	73	286	294	289	117	149	147	140	245	259	84	124	122	193	192	260	464	89	137	155	88	132	233	94	183	183	310	67	162	157	91
1549	chr1	208008004	208013625	101	228	170	290	196	214	280	174	125	402	445	430	210	236	226	208	334	364	99	181	140	312	226	344	503	133	144	194	106	175	257	100	112	126	379	78	187	179	120
1550	chr1	208023484	208025341	138	278	211	169	128	131	171	103	94	217	314	232	124	161	154	244	371	231	115	281	140	215	212	140	240	175	142	184	131	227	423	151	218	230	356	138	263	225	161
1551	chr1	208067516	208068481	69	109	86	71	74	81	87	69	65	112	169	105	83	81	86	165	285	181	104	123	75	103	77	62	98	109	91	123	59	86	177	67	75	107	170	44	138	112	93
1552	chr1	208568476	208569789	122	276	172	119	86	70	106	42	46	115	160	150	72	77	67	234	331	133	141	176	115	120	70	62	107	108	80	116	112	196	275	67	137	185	151	87	160	153	97
1553	chr1	208583090	208583639	5	11	13	19	25	27	22	14	10	28	23	15	13	21	22	2	13	20	1	11	15	2	3	5	17	3	18	18	4	11	25	9	12	19	22	6	7	11	9
1554	chr1	208612859	208614627	96	271	715	1738	1238	1515	2316	264	114	1532	1465	1415	553	706	700	207	361	1152	75	166	552	286	51	564	411	197	199	149	138	401	415	300	566	246	940	127	268	355	382
1555	chr1	208633450	208634809	2	1	12	59	73	59	51	10	8	4	8	8	6	5	3	0	3	2	0	0	3	6	2	1	6	5	7	7	5	1	5	4	0	6	15	4	3	6	3
1556	chr1	209498041	209501212	212	409	286	190	125	110	150	102	139	175	228	198	128	101	91	314	496	201	256	378	169	351	307	164	329	206	159	223	183	347	470	181	340	333	316	165	243	238	208
1557	chr1	209566034	209568970	115	244	212	99	102	94	129	96	103	171	234	195	106	89	126	286	382	288	168	217	139	249	216	179	278	118	119	159	143	251	287	120	198	165	313	82	186	156	144
1558	chr1	209621981	209624059	198	438	302	176	156	163	227	272	183	283	362	300	133	138	171	328	565	302	250	361	195	347	322	212	424	249	174	239	195	279	575	180	321	324	392	192	370	358	206
1559	chr1	209755077	209755904	20	52	31	17	7	16	12	6	7	20	25	26	7	8	16	24	49	16	9	30	24	27	21	8	23	32	22	40	21	46	82	31	70	20	59	24	17	41	27
1560	chr1	209817561	209820054	197	409	226	203	129	98	141	113	110	131	209	145	76	73	75	305	485	197	178	380	140	360	247	159	275	206	166	249	186	343	506	197	329	240	264	170	282	249	178
1561	chr1	209846196	209847488	28	55	100	21	15	42	48	109	60	91	134	104	50	49	62	110	202	245	74	69	77	121	164	174	294	18	20	24	32	71	109	69	116	128	183	40	152	105	107
1562	chr1	209915208	209915929	38	129	57	38	16	25	28	24	23	31	52	38	16	16	31	52	110	36	35	141	33	70	32	35	32	62	34	69	46	92	132	36	72	41	77	39	59	53	36
1563	chr1	210069956	210071094	83	182	81	41	31	18	30	35	57	39	60	43	29	20	19	138	214	56	103	113	52	154	136	54	122	60	47	70	110	130	177	59	164	139	78	85	97	90	60
1564	chr1	210274666	210276502	127	254	179	191	116	120	167	111	101	195	269	200	108	119	132	157	275	195	113	212	150	235	183	169	236	188	120	133	112	221	334	138	313	169	305	113	226	210	170
1565	chr1	210524405	210526816	305	633	327	205	139	103	156	213	236	202	348	283	153	142	156	460	679	294	356	610	224	509	478	225	455	293	237	313	297	485	724	255	483	470	425	271	417	406	274
1566	chr1	210654211	210655757	128	254	157	130	84	78	117	94	109	134	220	151	89	89	94	192	320	147	151	307	102	223	191	111	179	113	114	142	148	181	323	121	227	208	234	94	174	165	108
1567	chr1	210672276	210673502	138	276	122	51	65	43	80	63	53	67	99	53	37	35	43	239	276	99	159	237	59	172	188	60	104	90	80	104	139	200	279	88	157	178	148	95	130	90	82
1568	chr1	210798193	210799383	68	126	86	52	42	35	59	39	42	74	84	93	47	36	53	108	149	61	55	78	51	97	105	51	114	79	63	80	36	83	140	47	109	110	130	50	98	100	49
1569	chr1	210846692	210850879	677	1134	504	437	281	289	351	311	371	207	305	266	165	172	165	1017	1472	357	503	837	394	447	673	238	810	698	448	862	523	844	1281	451	1009	1018	833	529	920	1168	479
1570	chr1	210922131	210924426	65	78	86	95	77	109	127	58	34	115	145	141	78	85	92	187	323	161	129	123	64	94	184	93	274	69	51	75	55	84	105	52	83	97	194	30	81	134	49
1571	chr1	210938879	210941534	100	169	88	110	82	57	103	21	41	59	65	70	48	28	34	186	277	58	149	161	44	102	185	40	124	139	85	111	103	98	175	74	160	117	227	70	152	141	72
1572	chr1	211031149	211032653	203	409	254	151	103	101	143	157	131	182	214	191	96	88	96	338	461	194	227	347	141	345	321	139	345	189	145	218	164	295	501	147	314	304	325	175	311	298	181
1573	chr1	211097500	211099291	142	335	163	151	90	79	84	105	110	105	168	137	74	56	70	260	443	153	204	309	109	263	255	98	207	163	145	184	138	257	382	143	198	217	211	116	210	162	141
1574	chr1	211190128	211191485	42	114	58	85	80	53	70	48	59	38	62	43	20	17	22	120	155	43	50	123	32	92	80	35	55	62	41	69	56	84	98	56	103	88	145	50	97	89	43
1575	chr1	211194668	211197177	7	13	30	101	94	127	167	59	31	63	52	66	32	37	40	22	21	39	14	26	9	16	36	51	72	10	28	25	10	26	21	14	41	49	113	11	41	47	24
1576	chr1	211199085	211200449	11	20	29	91	74	65	84	32	23	31	28	33	11	23	18	30	44	29	25	20	15	34	38	42	44	20	22	25	6	15	18	11	33	31	69	12	35	30	20
1577	chr1	211217497	211220619	10	34	36	120	99	112	117	89	57	68	80	75	56	65	48	75	122	97	69	62	28	102	112	74	139	43	39	45	20	49	37	17	55	37	125	24	95	92	41
1578	chr1	211254614	211256078	158	431	229	176	133	78	152	142	143	160	269	195	96	99	121	284	421	220	170	319	122	349	218	137	279	198	172	230	195	281	476	187	279	239	322	129	280	212	196
1579	chr1	211290765	211292036	71	101	74	46	46	44	51	68	37	68	96	66	38	48	34	131	179	79	53	102	62	128	109	77	115	64	45	72	36	80	164	47	77	94	122	49	89	58	68
1580	chr1	212520250	212522079	121	304	147	95	55	38	54	48	53	90	108	83	54	36	37	160	225	61	149	239	97	169	119	66	108	110	86	133	148	238	282	90	183	118	162	84	158	124	94
1581	chr1	212791047	212792520	39	20	20	11	5	3	6	1	1	5	6	8	7	3	6	2	3	2	1	1	8	6	6	4	2	34	9	16	47	43	151	34	33	40	25	45	31	44	28
1582	chr1	213806754	213808370	77	167	94	58	53	33	41	32	34	64	84	65	42	34	34	149	209	69	102	127	58	99	112	61	93	73	38	68	68	126	197	56	96	51	74	54	69	51	45
1583	chr1	215870613	215871565	53	126	73	55	39	54	82	55	74	86	120	99	62	47	54	122	207	91	53	107	58	103	89	73	105	59	61	57	72	80	182	61	73	92	112	61	120	70	51
1584	chr1	216524499	216526182	123	242	172	119	109	97	134	117	89	176	208	182	99	91	93	221	324	190	140	216	101	224	212	163	213	158	95	142	111	177	298	119	198	190	278	106	186	192	124
1585	chr1	217413426	217415943	163	340	246	210	153	159	252	205	144	221	264	230	122	134	129	312	466	265	201	301	190	288	269	186	374	184	189	246	167	279	477	153	279	292	472	154	237	225	171
1586	chr1	218285980	218286972	142	270	195	168	151	128	178	85	92	225	297	240	112	137	155	230	340	238	143	302	148	227	195	179	263	140	123	166	111	196	412	162	186	191	331	87	187	171	161
1587	chr1	218329129	218330574	65	80	103	106	87	97	101	113	59	225	238	184	118	121	130	97	169	167	68	151	82	108	124	118	203	66	88	97	73	103	274	81	76	111	173	66	95	101	90
1588	chr1	218333598	218334820	79	183	91	51	59	30	49	36	35	61	89	48	32	26	37	137	148	68	91	185	60	94	81	65	90	70	69	90	72	108	191	61	58	98	101	49	68	55	63
1589	chr1	218387119	218387660	4	5	2	3	4	6	5	19	7	29	17	29	8	7	7	6	3	10	1	4	4	8	1	10	26	1	3	3	0	6	4	5	3	5	10	0	4	6	2
1590	chr1	218459457	218461400	42	32	59	111	93	126	164	147	88	66	87	59	33	57	62	153	241	158	112	66	51	38	113	52	207	37	34	48	17	34	86	37	54	61	76	45	49	92	25
1591	chr1	218511503	218513167	137	369	239	142	132	120	160	207	161	280	362	248	157	151	148	304	439	290	208	341	173	280	279	189	346	181	176	202	139	227	431	144	311	265	367	128	261	270	190
1592	chr1	218767177	218767691	20	26	12	1	3	0	1	4	7	0	1	2	2	3	3	90	154	43	76	55	1	2	4	3	4	3	1	1	1	4	22	7	3	10	3	2	1	2	3
1593	chr1	218767956	218769120	12	35	9	1	0	1	0	7	6	2	0	2	0	1	2	111	109	43	69	61	3	11	2	1	2	2	1	3	5	5	25	10	6	4	5	7	6	2	2
1594	chr1	218930141	218930585	20	48	24	2	4	7	4	0	2	1	1	0	0	0	1	61	79	26	49	71	7	48	49	13	26	6	18	12	23	39	52	19	49	43	49	16	36	35	25
1595	chr1	218987880	218988853	52	61	49	5	7	9	8	8	9	1	2	0	0	3	1	128	225	109	81	153	19	33	57	28	28	9	10	14	12	33	120	29	68	68	97	52	45	57	35
1596	chr1	219026250	219027252	14	27	20	0	1	0	8	4	1	1	0	0	0	1	0	11	20	4	18	21	9	20	4	7	7	12	10	12	3	12	29	6	28	4	27	18	26	31	27
1597	chr1	219940672	219941327	3	10	12	10	11	16	12	22	13	38	38	29	8	13	16	6	11	3	5	9	5	5	9	6	19	2	5	5	3	9	5	4	7	4	20	3	6	10	6
1598	chr1	219977265	219985009	385	641	539	404	351	392	533	537	437	740	932	799	441	518	507	562	876	445	357	511	381	421	441	376	775	305	382	591	268	489	687	308	558	514	881	292	687	1002	380
1599	chr1	219994003	219995323	7	12	47	28	28	25	31	15	13	52	68	62	45	59	22	13	17	16	10	7	29	12	4	20	33	8	20	21	4	13	11	19	14	12	62	6	16	23	20
1600	chr1	219995678	219997747	17	15	60	65	82	51	88	28	14	76	73	84	41	55	40	11	19	35	20	17	27	15	5	20	43	3	46	29	7	19	16	13	19	11	89	12	7	23	14
1601	chr1	220000662	220002738	15	56	99	62	70	61	65	61	34	203	183	156	109	115	107	48	56	85	20	24	45	26	18	57	65	9	38	50	11	23	35	32	51	27	124	19	23	42	44
1602	chr1	220015171	220019624	34	69	195	181	159	202	258	97	59	329	282	297	189	224	195	67	101	156	39	53	127	71	27	127	178	41	93	124	41	67	92	90	90	81	300	46	77	134	107
1603	chr1	220033084	220034927	9	14	64	69	62	79	115	42	28	101	95	92	60	66	73	34	50	64	12	21	65	23	17	42	95	7	36	49	11	24	42	35	43	13	118	16	27	44	38
1604	chr1	220829395	220830621	50	109	102	66	53	55	83	70	56	121	157	115	73	63	76	83	189	104	74	121	79	98	110	80	117	74	53	68	56	89	205	71	105	99	156	53	116	73	79
1605	chr1	220857230	220858375	100	186	99	53	46	26	38	58	59	44	58	61	28	29	17	130	194	95	94	173	48	106	75	38	74	71	71	146	59	149	175	62	89	96	80	46	109	107	64
1606	chr1	220883210	220885063	122	202	233	138	100	102	174	149	103	217	328	252	150	141	179	202	306	217	132	232	156	229	258	169	421	176	128	162	134	207	369	146	238	247	330	141	247	268	160
1607	chr1	220951279	220954019	159	314	231	132	101	127	160	132	121	216	306	231	132	140	106	222	358	224	161	259	156	277	228	172	272	197	151	203	139	240	396	161	253	280	316	146	225	208	159
1608	chr1	221054364	221055494	67	145	86	64	43	34	38	48	37	71	109	67	37	35	45	127	179	95	78	143	43	151	107	78	119	57	59	49	71	98	175	49	36	81	88	36	74	50	44
1609	chr1	221381909	221384219	2	22	9	178	111	60	88	15	14	8	11	9	2	2	2	16	27	3	18	23	8	20	10	7	5	7	3	8	1	4	14	3	5	14	12	6	4	13	4
1610	chr1	221966266	221967916	52	118	53	19	20	10	19	6	10	22	29	31	15	12	14	152	256	84	74	119	30	58	40	21	45	30	24	45	38	56	112	26	109	70	71	57	79	58	54
1611	chr1	221970250	221971522	20	28	41	11	9	20	24	10	10	61	79	64	25	29	32	71	99	113	23	32	41	24	20	26	41	10	18	29	9	23	52	10	39	28	61	19	55	54	41
1612	chr1	222099569	222101018	127	214	138	69	50	38	47	29	42	51	101	58	39	26	36	223	301	69	176	135	84	116	122	25	75	88	83	104	73	151	250	55	251	169	140	115	67	98	50
1613	chr1	222246668	222247525	100	78	92	78	51	26	48	71	74	26	29	31	17	11	15	88	134	80	89	151	34	64	50	52	62	61	52	79	34	119	170	78	104	142	70	57	44	46	59
1614	chr1	222368003	222369476	170	316	240	150	104	107	124	111	99	227	297	242	109	112	136	235	376	186	194	260	142	215	247	140	282	174	119	192	129	236	427	140	240	233	249	126	221	226	145
1615	chr1	222436597	222438788	188	397	188	142	122	93	112	108	123	113	180	123	71	47	59	371	548	177	286	387	132	263	267	93	261	201	139	231	183	369	406	140	287	314	272	148	251	250	148
1616	chr1	222584083	222585255	104	223	146	99	66	81	94	57	49	117	190	128	81	90	80	141	268	141	97	187	84	193	181	115	178	119	100	112	98	171	278	103	158	159	229	99	182	146	115
1617	chr1	222595383	222595696	9	6	6	5	4	3	3	1	1	1	2	3	0	0	1	4	7	1	1	2	6	1	2	2	2	9	7	7	11	21	25	5	18	13	5	5	2	3	3
1618	chr1	222610988	222611873	79	160	69	83	45	39	64	42	59	60	102	77	42	36	51	93	175	80	91	165	40	102	108	47	100	81	60	89	89	117	218	76	72	80	116	54	87	70	53
1619	chr1	222686676	222690069	150	301	221	137	105	108	126	158	164	200	228	178	106	102	105	259	428	172	230	276	126	240	276	173	323	166	125	224	153	242	345	119	252	248	246	163	255	237	160
1620	chr1	222757614	222758165	19	51	26	17	9	15	17	19	16	23	27	26	13	14	7	30	44	25	11	23	10	34	19	10	39	27	15	15	23	43	41	12	39	22	29	17	21	25	5
1621	chr1	222987204	222989048	7	6	9	99	90	86	131	31	11	28	32	24	14	12	17	25	46	31	7	12	6	19	16	26	43	6	2	7	2	17	25	7	13	25	64	10	22	48	10
1622	chr1	222990817	222992411	11	6	7	88	89	97	126	19	23	10	20	18	8	7	14	38	45	11	9	6	4	12	28	21	35	5	1	7	6	10	22	5	24	24	61	11	23	25	13
1623	chr1	223681007	223683843	183	479	253	144	118	94	136	106	128	186	239	190	114	101	106	335	475	210	217	471	186	338	249	138	235	213	199	266	237	343	511	190	346	293	372	172	241	220	181
1624	chr1	223689673	223690895	51	57	109	4	3	9	11	8	2	64	67	85	34	27	45	2	1	5	8	40	106	19	8	33	36	47	102	118	49	71	116	91	127	90	208	98	62	122	76
1625	chr1	223698951	223699766	41	74	150	63	59	92	112	93	46	180	152	169	78	72	111	54	116	164	45	96	95	78	76	119	195	42	52	103	58	83	152	66	120	101	200	52	74	77	66
1626	chr1	223721189	223723309	213	421	302	153	132	153	168	165	143	311	408	356	186	184	198	385	613	322	284	421	214	357	361	218	438	233	183	239	194	280	437	150	395	342	391	149	421	314	226
1627	chr1	224031491	224033293	93	169	155	148	73	76	118	111	87	181	233	185	101	108	120	212	338	198	109	173	111	188	184	105	234	119	92	105	98	168	265	89	252	155	247	105	176	180	110
1628	chr1	224136082	224137576	90	263	110	69	61	33	49	45	56	40	88	64	31	24	37	185	311	96	148	239	61	149	145	56	72	103	70	99	91	165	265	76	120	118	141	61	100	73	83
1629	chr1	224177871	224179264	175	449	267	156	86	85	103	112	130	138	186	168	76	72	73	339	436	178	243	369	160	369	265	145	251	209	154	205	192	312	452	180	317	252	275	146	310	235	186
1630	chr1	224253285	224254915	300	506	629	453	309	441	560	507	369	534	641	623	286	345	372	449	710	666	310	504	477	459	495	502	846	366	360	501	286	488	913	400	619	574	763	266	558	605	418
1631	chr1	224315862	224318260	220	451	292	172	109	88	151	144	150	163	251	209	106	97	117	427	649	276	254	393	174	369	335	180	351	244	177	209	227	367	511	175	439	403	316	192	330	331	234
1632	chr1	224337358	224338191	34	99	58	19	19	8	28	23	24	30	60	44	19	16	18	71	88	35	55	113	15	72	66	39	46	46	24	39	47	69	112	38	48	42	64	37	65	57	38
1633	chr1	224363978	224365726	241	492	247	150	86	51	111	81	117	76	176	128	59	60	57	427	551	149	319	370	163	390	401	125	324	202	137	202	257	384	459	146	414	380	239	187	325	292	171
1634	chr1	224375697	224377499	172	427	202	131	97	71	91	70	79	89	145	122	57	52	44	198	335	132	269	380	118	352	219	128	192	200	143	209	212	294	383	133	313	249	240	102	235	186	166
1635	chr1	224381822	224383444	68	119	126	107	79	56	101	44	30	111	138	125	77	81	82	52	103	131	77	152	100	122	105	113	163	107	68	92	46	127	229	88	135	141	183	85	172	119	109
1636	chr1	224387191	224387888	7	10	4	6	5	3	6	8	4	11	22	26	4	14	9	8	24	18	17	15	9	8	6	4	16	12	14	8	7	16	22	2	11	18	18	9	40	42	15
1637	chr1	224440468	224441763	220	443	205	139	101	92	133	120	132	127	175	165	72	79	77	400	536	182	260	323	154	321	299	116	285	213	129	218	188	342	437	165	288	276	300	173	278	266	182
1638	chr1	224477521	224478604	26	47	20	8	2	2	9	8	6	18	31	23	14	8	5	20	40	16	16	20	11	26	9	7	16	13	11	32	17	43	46	10	49	96	31	19	44	27	7
1639	chr1	224562768	224564285	152	456	256	169	101	75	91	56	67	77	118	98	48	46	40	228	339	154	204	391	123	313	160	109	123	197	135	184	230	362	448	155	348	200	269	139	253	191	152
1640	chr1	224661591	224663172	97	278	145	110	61	67	87	69	79	67	130	101	39	34	45	248	367	159	151	290	90	247	179	100	174	141	77	118	155	219	285	84	226	186	180	103	184	147	97
1641	chr1	224916968	224917740	19	15	28	29	15	24	19	23	15	54	58	48	50	40	63	9	31	41	15	25	14	35	28	19	62	16	9	26	13	8	29	7	19	13	33	12	25	27	14
1642	chr1	224934235	224934840	29	26	25	30	30	23	22	21	19	33	53	42	29	29	23	13	24	14	24	33	26	39	42	30	45	21	26	24	8	15	45	15	12	23	36	15	19	25	11
1643	chr1	224956924	224958471	146	339	179	125	95	67	99	70	89	132	173	151	64	76	77	227	332	153	194	238	123	236	212	109	197	142	141	176	177	243	352	115	206	248	216	131	254	206	140
1644	chr1	224987127	224988599	5	14	21	41	47	65	83	36	30	56	74	69	37	49	50	2	15	18	9	11	9	21	31	38	56	7	10	12	5	7	25	13	10	10	33	11	4	15	6
1645	chr1	224991298	224994180	79	136	132	73	85	61	70	65	75	111	162	127	46	56	76	160	171	81	137	170	65	186	159	99	157	98	76	86	56	98	176	63	89	90	105	80	52	73	65
1646	chr1	225053109	225053618	6	12	5	5	7	1	6	10	8	6	10	19	9	6	6	36	61	14	13	15	3	9	8	6	17	7	5	8	5	4	8	4	3	3	6	5	19	19	5
1647	chr1	225124596	225125443	43	115	46	45	34	12	26	14	19	13	20	18	10	12	5	78	112	41	57	130	41	81	57	31	62	34	36	61	65	82	160	47	58	105	63	47	38	28	51
1648	chr1	225193197	225195042	251	524	304	231	131	141	196	125	151	192	260	205	110	115	135	384	572	303	279	443	225	353	389	177	389	310	234	246	232	466	713	213	411	350	308	224	378	314	189
1649	chr1	225238501	225238871	2	2	2	1	2	1	1	2	0	0	2	3	0	0	0	0	2	0	2	2	3	2	3	1	2	5	2	1	3	10	14	3	1	4	5	1	7	12	0
1650	chr1	225571962	225573646	51	93	53	1	3	0	6	5	5	3	3	2	3	1	0	4	4	0	13	96	61	12	3	10	13	55	42	34	148	201	336	105	88	44	58	107	37	74	54
1651	chr1	225817547	225818776	74	230	175	111	67	73	99	73	48	128	203	129	75	88	91	197	273	113	87	214	98	194	146	92	208	159	110	137	135	208	292	95	208	142	221	116	227	175	94
1652	chr1	225981131	225982074	5	5	11	8	9	8	8	15	9	27	30	39	25	31	23	11	13	11	7	4	5	11	12	24	15	5	5	12	6	6	8	5	17	12	22	2	5	10	7
1653	chr1	225982236	225986768	102	191	130	105	80	87	88	120	86	168	257	207	119	134	131	149	214	116	125	147	76	186	144	105	164	114	80	128	96	166	191	80	100	87	216	79	171	186	91
1654	chr1	225988964	225990369	254	513	200	125	96	71	97	85	129	98	171	151	64	58	62	352	488	163	232	431	152	356	272	103	212	204	147	212	240	331	552	148	260	334	252	171	272	207	185
1655	chr1	226042087	226042512	33	64	39	38	18	11	25	13	22	13	26	15	17	19	14	49	66	27	16	70	21	32	14	14	14	30	25	34	27	32	107	45	24	41	42	42	30	32	18
1656	chr1	226325832	226327892	21	29	37	7	13	6	14	52	33	59	61	74	24	26	36	23	38	37	33	51	16	39	24	42	26	20	20	28	11	24	30	23	14	21	52	15	15	10	24
1657	chr1	226335865	226339040	240	543	275	189	129	113	168	157	192	111	207	131	93	77	83	375	551	173	271	460	162	360	300	145	261	230	203	264	261	416	541	199	404	297	333	184	315	303	174
1658	chr1	226351807	226356584	86	195	108	140	80	100	100	103	77	128	139	189	57	62	67	117	197	106	86	144	39	202	124	87	149	116	64	108	57	137	183	69	86	47	127	65	145	196	90
1659	chr1	226357213	226358057	73	213	75	69	31	28	40	39	43	49	78	57	22	32	18	130	141	65	88	183	48	128	91	34	58	99	73	63	85	128	241	74	90	93	101	64	98	76	71
1660	chr1	226358968	226359953	8	15	16	15	17	12	14	31	17	28	33	32	12	22	9	21	25	18	8	23	17	22	15	9	29	14	12	17	7	25	31	7	16	5	23	16	34	33	4
1661	chr1	226363229	226364450	216	412	147	130	87	57	98	190	180	78	172	114	72	82	89	365	451	139	273	423	116	263	295	108	223	185	108	216	141	285	464	148	214	264	232	138	231	218	120
1662	chr1	226393812	226395822	197	427	220	143	86	72	135	147	174	98	177	147	69	58	67	403	530	198	274	453	134	311	357	107	287	192	145	226	239	317	540	143	314	364	268	200	263	283	180
1663	chr1	226419154	226421087	291	609	287	182	152	97	137	138	166	138	255	189	100	83	80	494	774	210	360	431	184	456	373	135	357	250	190	249	301	444	596	156	513	428	372	252	423	368	234
1664	chr1	226660296	226661890	97	233	88	72	46	41	70	63	83	74	106	83	45	40	30	162	242	97	106	197	73	174	134	57	125	97	70	96	71	157	213	61	159	117	140	62	129	89	73
1665	chr1	226710824	226714248	240	840	539	505	352	234	312	318	244	503	813	662	312	364	401	430	744	741	392	1166	483	753	413	556	523	445	401	656	287	414	726	304	483	292	900	79	34	41	37
1666	chr1	226717784	226719457	52	212	132	57	39	33	53	70	53	127	192	156	72	65	83	112	185	131	178	397	99	230	90	158	68	65	76	96	58	104	89	74	89	55	193	19	7	10	8
1667	chr1	226740772	226742877	119	266	128	118	111	54	87	75	73	99	173	123	56	60	73	212	242	156	154	297	84	210	155	109	158	96	126	144	133	221	322	127	119	174	244	64	127	101	122
1668	chr1	226749109	226749961	8	10	9	7	8	6	7	15	7	32	17	18	6	5	13	16	26	13	18	13	6	20	25	10	30	7	4	5	4	5	14	3	4	12	18	9	14	16	7
1669	chr1	226849448	226850578	4	4	11	4	1	6	2	1	4	1	8	7	3	3	3	1	6	4	47	67	15	6	3	2	2	9	3	2	4	4	3	2	9	7	19	4	3	4	1
1670	chr1	227473141	227474025	96	202	91	21	19	19	33	21	29	29	49	45	15	17	17	135	183	73	100	150	54	138	83	37	74	83	65	72	65	135	167	63	113	101	103	47	82	86	66
1671	chr1	227544313	227545954	162	234	126	51	27	25	34	38	37	31	77	55	18	19	25	120	155	52	102	228	80	121	74	43	70	181	122	190	138	246	385	93	175	143	192	82	104	119	111
1672	chr1	227710028	227711607	229	520	335	254	181	140	181	159	160	268	392	313	178	141	141	368	578	334	262	489	218	472	355	228	382	281	207	274	221	364	679	213	419	363	464	176	397	332	219
1673	chr1	227760080	227761828	127	340	150	97	75	39	58	61	61	53	112	88	41	44	47	251	292	111	177	338	72	227	139	73	119	110	128	145	150	240	384	131	168	173	156	98	111	121	124
1674	chr1	227827534	227829188	148	340	144	98	74	33	69	51	57	67	103	76	36	30	37	251	294	99	218	278	105	228	204	75	143	129	97	136	160	256	280	104	214	184	145	108	185	149	124
1675	chr1	228268646	228270765	199	334	165	82	61	66	74	58	62	58	88	71	36	34	33	235	323	103	175	317	108	227	167	73	162	120	129	176	167	275	341	123	232	233	173	104	158	163	99
1676	chr1	228844554	228845645	118	238	105	94	58	50	62	43	51	67	112	83	44	46	46	174	270	92	128	169	76	208	218	66	210	143	82	107	114	177	259	83	229	159	142	103	197	168	82
1677	chr1	229070661	229071359	21	34	11	23	14	9	11	9	9	4	12	6	3	3	3	25	37	11	22	30	10	9	11	4	15	11	8	15	13	39	33	12	18	15	12	9	17	18	8
1678	chr1	229180251	229182179	155	379	191	186	117	104	148	131	107	110	206	133	74	58	76	312	440	188	193	366	137	323	238	135	236	195	157	176	185	304	476	148	281	196	275	155	250	212	128
1679	chr1	229242350	229242823	4	14	8	3	5	0	3	2	3	2	0	1	2	0	0	6	6	0	26	35	3	5	6	5	6	6	3	1	8	9	8	1	3	3	3	4	3	2	2
1680	chr1	229442642	229444458	199	462	253	166	128	132	164	125	135	184	276	216	113	133	124	357	543	233	245	427	174	365	319	171	321	249	153	251	212	358	556	179	366	296	346	150	357	289	174
1681	chr1	229539523	229541145	189	488	226	180	112	97	154	141	129	167	238	203	122	128	141	330	501	196	159	364	139	351	283	161	363	272	172	210	178	306	552	155	307	249	312	186	336	323	181
1682	chr1	229623406	229625298	179	442	196	107	65	29	65	64	101	70	174	109	51	47	52	310	406	183	204	387	98	335	233	111	217	145	162	204	165	309	469	151	263	303	172	120	166	140	143
1683	chr1	229730322	229731701	116	233	181	151	111	108	128	110	68	187	276	165	106	109	106	177	288	239	109	238	112	215	217	152	238	147	142	160	100	156	391	142	178	210	264	109	220	186	161
1684	chr1	231007104	231008737	97	211	110	95	63	64	83	69	57	90	100	102	45	44	42	124	190	63	105	124	63	199	209	94	181	104	82	98	55	114	169	52	101	130	121	74	102	92	60
1685	chr1	231151762	231153962	92	212	153	111	84	82	127	97	71	192	211	165	111	117	119	142	283	182	99	230	87	175	144	106	138	89	99	136	89	144	308	129	96	140	244	95	121	131	99
1686	chr1	231497479	231498302	43	91	61	35	26	11	22	7	16	33	34	33	16	10	16	62	82	34	45	83	38	58	47	38	48	48	43	45	46	74	138	32	49	24	58	35	25	17	26
1687	chr1	231815641	231817928	34	71	43	100	66	61	77	58	73	19	26	23	12	10	15	29	34	11	134	108	28	21	23	10	20	63	39	74	33	48	133	19	50	88	30	91	233	190	80
1688	chr1	232558985	232559645	24	35	30	57	33	37	28	40	39	0	1	0	0	1	1	67	103	71	6	17	17	58	64	31	93	69	43	66	22	39	72	21	4	4	5	17	116	71	62
1689	chr1	232575294	232576499	187	327	308	212	154	170	213	247	176	217	404	301	156	181	162	273	492	289	214	352	182	357	360	234	438	231	177	211	179	311	509	222	345	340	381	184	357	335	221
1690	chr1	232601151	232601957	3	12	20	27	21	44	64	64	25	61	63	65	25	39	39	17	27	46	15	7	23	18	9	38	73	7	15	14	3	16	12	20	9	4	18	5	9	16	15
1691	chr1	232680282	232681862	220	553	263	159	123	62	115	83	120	100	204	126	90	71	80	378	576	172	318	522	150	418	360	130	277	142	164	182	227	441	536	165	331	312	295	150	283	207	196
1692	chr1	232801139	232816200	1097	1863	1250	1304	1078	1211	1652	1140	980	1569	1790	1681	917	971	1049	2137	3085	1445	1672	1649	870	1742	1947	1364	2834	734	639	1084	680	1286	1481	640	1365	1422	1759	643	1646	2007	890
1693	chr1	232974064	232975518	34	52	59	47	38	59	84	54	41	74	69	85	36	58	67	102	164	85	56	48	26	71	120	77	205	27	15	37	21	35	33	22	73	56	79	29	70	99	29
1694	chr1	233043700	233046014	44	61	88	181	114	155	228	140	72	115	112	139	78	89	107	175	291	151	106	69	49	111	183	143	388	41	34	55	26	59	47	34	103	67	136	35	137	166	57
1695	chr1	233128068	233130804	31	80	81	93	75	89	150	75	37	176	205	195	101	129	125	72	157	121	67	36	70	104	96	113	192	37	36	59	31	44	34	28	75	53	116	38	104	121	49
1696	chr1	233135379	233136359	24	23	27	21	28	38	48	42	24	75	83	64	54	55	58	32	81	69	41	50	34	41	48	67	97	16	17	22	10	31	37	15	22	28	54	11	67	46	18
1697	chr1	233156032	233158647	23	39	38	78	84	125	157	62	34	81	135	81	49	62	82	59	105	42	106	63	30	124	138	129	241	13	20	15	9	30	22	18	45	47	83	26	67	80	25
1698	chr1	233163862	233166807	30	52	147	161	134	170	297	113	60	302	294	300	161	210	183	92	148	206	84	64	96	114	114	200	341	18	51	56	28	64	48	51	72	61	184	38	98	89	86
1699	chr1	233172627	233175309	18	28	34	187	162	194	279	61	45	173	164	183	122	126	147	51	65	96	33	20	44	30	30	34	61	24	21	25	12	27	39	25	26	18	91	31	80	99	52
1700	chr1	233180416	233183893	113	139	183	300	249	285	422	176	118	384	399	389	211	253	319	275	419	307	164	106	120	234	264	269	462	87	82	117	68	80	84	61	120	94	284	99	311	331	150
1701	chr1	233189473	233190486	17	28	32	34	27	30	37	35	13	66	72	78	49	50	47	46	84	35	29	28	22	32	53	46	78	18	9	20	13	15	16	20	32	21	46	11	65	77	33
1702	chr1	233206097	233207687	10	20	61	7	13	22	39	24	11	224	285	247	146	134	184	16	21	54	18	16	33	46	19	123	88	9	25	45	9	16	16	31	9	14	81	7	35	36	42
1703	chr1	233208701	233209370	3	3	6	19	4	10	19	10	9	34	31	31	14	15	33	6	7	14	5	5	8	2	6	14	15	2	11	12	1	9	7	8	3	1	8	2	5	4	9
1704	chr1	233213183	233216101	121	165	235	197	167	238	300	220	135	342	397	364	207	192	281	272	494	329	180	146	133	245	312	241	601	90	79	134	81	129	144	74	156	139	301	89	307	315	140
1705	chr1	233224682	233226347	22	25	30	29	43	45	47	35	22	78	107	88	65	69	62	48	98	69	21	11	17	40	50	28	60	12	11	16	9	19	25	15	45	28	93	8	37	33	8
1706	chr1	233237168	233237667	1	2	29	21	25	25	42	32	9	44	49	36	21	22	20	16	27	45	12	10	16	12	15	41	55	1	6	8	0	4	5	6	8	3	15	1	10	10	14
1707	chr1	233249765	233250997	36	46	81	58	53	63	97	35	26	70	113	114	61	86	98	60	119	85	33	48	52	61	96	91	146	27	14	46	28	54	40	25	52	24	105	25	101	118	67
1708	chr1	233251602	233251942	3	5	7	7	8	6	12	3	4	10	15	9	7	8	6	4	18	6	5	2	6	5	2	11	19	7	3	4	3	5	2	3	8	7	13	2	20	19	4
1709	chr1	233312977	233313878	23	36	54	29	29	44	38	49	26	86	105	94	39	41	63	48	50	69	20	42	23	41	46	64	65	22	20	32	10	25	23	16	23	24	67	18	33	38	28
1710	chr1	233358127	233359260	164	294	218	159	122	143	154	119	128	154	241	208	103	99	114	249	352	221	201	285	125	235	258	168	310	209	152	214	152	260	455	139	263	260	344	178	303	234	193
1711	chr1	233390644	233391921	228	497	281	201	159	147	222	232	184	263	383	325	182	177	196	434	656	295	274	437	185	381	439	203	475	308	214	245	239	365	730	218	349	414	427	222	458	347	220
1712	chr1	233556817	233559690	190	378	262	207	173	161	233	258	232	274	408	319	178	214	204	367	529	297	225	378	194	329	412	224	528	217	187	270	187	313	598	197	299	312	405	194	309	363	199
1713	chr1	233596963	233597756	152	309	193	162	111	124	166	117	101	191	281	211	133	115	123	186	315	213	135	307	119	246	224	140	224	162	117	219	111	210	404	153	124	205	318	98	215	168	141
1714	chr1	233733591	233735502	199	424	233	136	118	80	114	78	89	107	231	179	88	78	70	323	450	202	191	472	154	325	230	142	251	240	182	207	196	381	653	199	312	265	298	163	263	233	193
1715	chr1	234095898	234098417	184	303	204	182	113	140	199	147	140	146	221	179	97	112	134	245	374	132	195	278	151	232	215	114	300	156	150	211	152	221	404	144	203	270	309	126	195	266	139
1716	chr1	234201509	234202572	34	34	72	46	34	34	45	43	26	127	139	123	56	76	62	49	73	72	36	45	31	36	49	62	92	26	28	41	21	51	86	34	96	73	120	34	54	56	51
1717	chr1	234296005	234297396	11	15	31	65	78	72	117	50	33	108	133	100	68	95	97	38	66	43	11	22	46	17	35	30	80	16	7	29	9	20	84	45	57	48	84	20	42	38	35
1718	chr1	234371949	234373327	67	95	51	46	46	24	45	31	51	35	81	53	24	22	38	130	164	49	76	90	46	87	99	28	105	58	30	58	43	85	94	37	83	63	70	52	88	92	41
1719	chr1	234385205	234387201	42	93	92	120	95	142	176	107	85	123	135	123	67	70	97	106	179	123	47	61	58	123	96	92	166	44	56	70	43	73	95	28	52	52	129	48	118	142	53
1720	chr1	234389284	234391507	66	67	89	82	62	100	133	61	48	91	84	105	44	56	75	90	139	95	69	62	46	117	135	92	210	54	50	67	32	50	124	41	72	82	126	46	131	151	63
1721	chr1	234497581	234498036	4	3	8	11	12	15	12	24	4	9	7	11	8	14	16	4	4	23	4	3	5	9	5	19	41	8	1	6	4	4	8	4	7	1	6	1	3	12	4
1722	chr1	234510625	234512837	242	565	275	148	97	106	146	191	193	166	226	198	121	139	101	505	727	251	246	300	145	354	419	221	437	219	140	243	200	322	454	148	377	313	295	180	452	448	193
1723	chr1	234514010	234515065	6	26	50	37	24	47	55	34	17	84	93	72	48	56	62	26	24	61	9	14	27	19	20	47	61	13	21	14	8	18	36	14	27	24	55	11	6	23	7
1724	chr1	234624950	234625674	32	89	32	8	3	7	7	8	12	14	35	24	11	11	10	28	34	15	11	21	12	17	50	18	30	39	16	20	11	21	57	11	25	29	21	43	54	64	41
1725	chr1	234753530	234754851	64	121	84	71	36	54	79	72	46	96	116	84	50	61	46	103	127	64	70	143	91	103	123	91	149	95	80	101	80	117	206	82	120	113	206	64	98	113	65
1726	chr1	234833991	234834973	95	166	150	131	97	95	117	84	59	151	177	147	90	93	101	119	197	160	74	191	91	148	123	109	130	97	99	106	101	153	265	64	116	121	230	73	144	140	103
1727	chr1	235024447	235026572	135	286	211	169	124	140	167	142	106	228	296	232	146	154	152	271	438	244	178	270	166	239	307	159	346	146	146	189	123	231	377	150	248	267	331	121	302	235	143
1728	chr1	239748570	239750164	144	305	226	106	93	71	117	79	90	174	194	170	101	77	92	270	387	226	125	266	138	236	185	163	234	148	159	184	134	217	355	150	289	183	259	121	221	193	168
1729	chr1	239761322	239762517	7	18	57	6	13	16	18	33	8	116	76	107	53	54	51	23	31	45	3	9	27	29	9	63	89	10	23	19	9	14	47	29	27	31	79	12	10	26	24
1730	chr1	239869078	239871029	225	530	202	58	53	33	48	78	120	61	139	104	59	51	54	413	529	152	257	338	190	336	277	124	255	166	167	229	236	363	410	152	361	320	198	160	233	219	191
1731	chr1	240077320	240078767	83	215	113	116	76	76	81	64	63	101	150	119	71	61	83	165	261	115	76	229	81	193	148	81	131	122	92	121	113	151	223	79	234	127	181	92	193	171	88
1732	chr1	241331416	241331955	4	5	3	14	11	17	12	12	18	1	0	2	0	1	1	19	30	15	22	28	4	15	14	11	22	13	13	20	3	6	11	3	10	8	7	5	14	12	10
1733	chr1	241484007	241486807	173	434	216	175	112	100	126	160	147	242	353	265	160	144	157	321	455	239	215	404	155	378	350	196	377	205	156	256	188	264	585	191	277	288	336	155	278	304	177
1734	chr1	242078944	242081298	99	159	103	16	10	19	8	38	53	13	16	8	11	10	6	66	73	17	87	97	44	180	203	68	158	93	67	95	81	137	195	60	231	140	147	95	164	132	114
1735	chr1	242276994	242281390	246	402	229	96	95	85	136	201	172	233	422	292	138	180	162	275	398	241	180	286	168	418	293	219	484	188	148	240	140	280	405	189	228	322	343	175	337	273	251
1736	chr1	242529067	242529884	16	23	44	46	30	50	57	39	23	61	85	62	29	31	44	24	39	60	11	23	34	43	26	66	93	35	33	39	27	30	56	34	33	31	49	18	24	23	33
1737	chr1	242680374	242682501	201	372	226	179	137	95	170	124	177	146	253	207	90	93	112	317	540	236	244	342	136	306	278	141	271	214	155	250	159	287	437	183	269	252	286	133	256	215	163
1738	chr1	242690788	242691831	98	235	105	93	41	54	62	34	47	51	78	70	39	21	27	175	240	83	116	154	59	137	146	48	136	149	98	126	113	153	225	56	186	148	173	72	144	119	83
1739	chr1	242882067	242883734	224	373	191	137	93	59	82	86	101	85	137	116	61	46	78	307	436	176	253	435	173	325	221	134	223	164	156	189	199	328	409	141	293	279	227	146	153	171	149
1740	chr1	243063714	243072464	352	752	694	515	391	413	547	366	301	847	988	831	413	397	423	636	949	676	444	595	393	713	568	647	805	473	412	512	399	673	947	456	785	578	959	315	576	571	493
1741	chr1	243073944	243074801	1	8	21	20	19	13	24	11	8	53	53	52	19	20	30	9	15	29	3	4	10	12	5	33	20	12	10	12	9	14	20	16	3	1	25	2	5	9	15
1742	chr1	243075897	243077034	4	16	29	21	16	17	38	17	9	54	60	58	25	27	20	15	10	20	3	3	9	20	3	32	31	5	12	9	4	13	38	18	6	2	55	6	12	10	21
1743	chr1	243078036	243083674	33	89	168	179	161	220	347	129	53	301	280	303	113	137	125	78	127	192	41	51	58	111	35	222	246	62	97	60	41	91	161	122	68	29	290	27	57	143	99
1744	chr1	243092277	243095574	349	824	458	335	249	225	267	251	266	281	362	331	155	146	192	631	872	440	438	636	276	632	460	328	532	395	348	435	387	592	799	307	600	502	588	233	538	493	337
1745	chr1	243199336	243201869	272	702	447	232	188	165	216	183	221	277	364	279	170	141	171	574	734	345	364	485	261	607	487	235	499	313	255	366	327	608	742	264	661	511	518	304	479	433	317
1746	chr1	244736715	244737617	88	225	89	79	43	36	57	57	54	56	139	92	41	29	33	128	164	83	80	248	46	113	90	61	61	106	71	120	96	136	251	92	73	105	148	48	67	53	89
1747	chr1	244795760	244797486	170	321	188	118	90	82	117	138	119	155	227	159	81	79	91	261	449	195	190	325	115	260	298	161	272	179	141	192	145	254	449	164	232	292	262	125	224	234	138
1748	chr1	244953798	244955111	89	239	106	87	57	40	42	50	43	47	99	76	35	31	28	170	229	77	134	164	59	146	168	65	93	61	69	70	92	187	249	76	202	149	121	72	116	82	77
1749	chr1	245160910	245162523	189	419	206	119	98	87	116	109	151	116	197	143	73	66	79	356	539	217	229	428	140	304	275	119	253	209	132	252	146	268	434	133	311	232	219	128	254	217	175
1750	chr1	245237539	245238267	18	59	37	1	3	5	8	8	11	27	51	35	24	16	23	48	61	28	38	106	43	84	47	41	34	51	38	60	40	71	95	42	50	14	38	23	33	27	13
1751	chr1	245307933	245309028	71	162	98	87	51	39	50	49	62	55	122	71	45	42	50	113	179	99	82	140	69	109	77	51	102	78	63	86	47	93	169	50	142	90	130	49	69	57	46
1752	chr1	245333678	245334792	115	205	133	58	34	37	75	62	88	108	122	108	56	62	65	154	229	107	87	153	80	151	189	80	200	127	76	110	100	128	194	91	173	142	154	107	166	158	87
1753	chr1	245440089	245441172	131	307	159	98	86	77	92	120	121	96	132	121	45	60	68	274	338	139	154	235	95	223	198	93	199	136	68	135	93	199	313	116	238	197	180	121	178	167	107
1754	chr1	245560873	245562727	126	272	134	115	77	46	71	51	71	52	104	45	40	16	26	236	341	107	176	217	100	208	242	81	158	101	91	122	170	206	308	95	250	179	157	81	144	128	97
1755	chr1	246661790	246663216	3	7	20	34	40	41	68	18	10	13	21	19	11	10	12	8	9	12	2	5	5	7	0	0	9	10	25	24	7	4	13	5	1	2	7	4	2	8	3
1756	chr1	246679656	246680583	2	15	17	33	35	31	72	24	15	41	43	31	24	41	34	14	40	19	1	1	13	18	10	6	120	3	11	3	3	4	14	8	11	4	123	1	7	25	7
1757	chr1	247065679	247066508	11	13	40	23	16	35	42	29	15	53	69	54	27	31	17	16	24	36	9	18	30	31	25	56	68	10	24	24	11	16	17	23	29	33	66	18	32	32	24
1758	chr1	247086496	247087877	110	218	149	82	78	80	90	95	74	159	217	202	116	93	112	180	284	175	129	222	91	171	190	118	224	132	73	120	93	151	265	108	138	194	249	90	157	162	106
1759	chr1	247098145	247100368	295	566	340	255	199	162	208	261	266	255	326	264	153	146	149	435	646	248	394	597	218	531	543	250	523	253	261	345	254	370	699	213	513	474	551	256	386	401	251
1760	chr1	247111921	247113805	19	37	36	50	42	28	38	58	38	92	85	96	40	38	31	27	40	44	25	45	20	55	44	61	58	20	26	16	11	26	42	13	33	7	74	18	36	46	29
1761	chr1	247118675	247120785	178	467	267	173	137	91	141	146	134	171	252	189	121	101	120	304	476	234	218	432	142	404	284	199	269	192	164	225	183	342	519	163	272	265	329	137	248	235	170
1762	chr1	247123625	247124502	133	270	123	92	54	49	59	68	69	39	64	56	33	22	21	187	278	98	126	254	83	174	139	61	123	97	59	113	84	142	252	76	140	120	173	69	122	86	105
1763	chr1	247133904	247134818	70	63	52	51	34	36	54	65	62	31	50	37	31	32	29	91	133	48	58	71	44	55	105	35	105	51	32	66	43	56	164	45	72	94	79	50	49	87	31
1764	chr1	247166460	247167828	203	432	205	150	112	74	124	114	120	126	250	180	103	87	101	330	492	217	218	336	156	295	266	114	282	241	116	223	174	334	505	150	325	294	275	165	256	238	174
1765	chr10	170136	173213	165	348	217	92	56	38	58	124	88	58	118	91	52	44	45	361	431	138	275	274	108	322	275	91	234	117	120	163	193	296	307	113	389	255	192	129	212	190	147
1766	chr10	342804	343264	1	2	6	2	1	2	2	1	2	16	28	32	8	7	9	7	6	2	2	3	3	3	2	3	2	4	1	1	1	2	4	0	1	0	8	1	6	6	5
1767	chr10	520570	521316	21	23	19	6	7	14	16	3	5	21	31	33	17	8	14	7	7	4	13	12	23	2	3	3	4	30	13	33	7	6	38	4	27	12	15	19	5	11	2
1768	chr10	838439	839703	15	41	16	10	4	8	5	9	19	26	28	30	6	15	10	19	23	12	10	30	7	26	17	17	41	19	12	21	14	24	45	10	24	12	32	22	51	41	5
1769	chr10	840027	844691	67	114	90	46	20	48	50	84	55	111	159	154	46	61	55	97	146	61	86	108	38	159	142	90	161	55	42	62	47	93	138	48	87	26	110	66	159	129	54
1770	chr10	965576	968425	146	278	177	96	77	46	87	70	108	87	164	126	62	52	66	193	312	136	154	242	112	236	169	91	219	126	104	165	128	185	243	111	214	207	188	95	143	160	139
1771	chr10	979235	980796	34	41	29	8	14	11	22	19	10	55	67	51	27	39	28	16	43	9	15	42	27	36	47	22	83	42	25	41	14	31	46	12	58	55	64	35	45	53	16
1772	chr10	1023386	1025080	131	366	158	138	91	83	120	82	88	96	184	155	83	83	87	282	415	140	178	247	96	266	254	82	204	197	138	150	162	240	365	126	270	221	228	119	276	243	143
1773	chr10	1055064	1055723	6	9	12	15	11	15	11	8	12	17	13	19	6	6	13	11	16	10	10	11	12	21	15	11	16	7	3	12	8	12	13	3	9	4	11	9	23	39	7
1774	chr10	1056422	1057725	10	23	30	33	20	28	42	22	7	36	41	46	15	15	28	20	33	34	14	33	23	36	16	29	28	17	15	18	17	34	52	17	14	10	37	14	39	49	19
1775	chr10	1076150	1076954	4	5	9	12	10	12	37	9	6	26	26	18	3	8	9	7	13	14	6	11	2	9	9	9	14	5	5	10	5	4	8	2	4	2	18	6	4	9	10
1776	chr10	1079303	1081285	12	25	77	59	60	61	101	69	37	144	132	146	56	67	64	39	62	103	17	31	42	45	23	83	108	28	43	41	18	42	75	47	57	41	121	15	23	33	43
1777	chr10	1081509	1082515	11	21	16	9	13	25	32	30	16	34	41	37	7	22	7	10	15	20	5	9	11	15	15	27	31	6	4	15	5	10	22	4	12	5	35	6	11	20	8
1778	chr10	1083550	1086428	584	1336	464	344	284	227	315	292	339	277	518	417	191	193	194	920	1244	443	555	1037	304	772	652	303	539	555	322	660	489	802	1149	377	767	804	722	448	620	708	366
1779	chr10	1091696	1093191	150	342	151	91	76	45	73	58	75	104	149	125	58	58	54	245	359	129	169	270	99	243	178	81	174	158	110	157	169	224	324	103	217	209	179	117	190	185	124
1780	chr10	1521238	1521840	7	16	17	12	7	13	20	17	16	46	52	63	46	35	45	16	20	32	6	6	9	25	23	21	68	11	9	11	5	10	29	8	23	23	59	5	28	20	18
1781	chr10	1558736	1559105	2	4	1	1	0	2	3	2	0	1	2	1	1	0	2	3	1	1	1	1	1	5	0	0	2	3	0	4	3	5	2	3	4	11	9	18	10	13	14
1782	chr10	1769041	1770203	44	116	61	56	55	45	65	54	43	71	132	91	41	54	55	250	392	143	26	39	44	34	57	32	31	87	19	25	65	91	264	98	143	134	130	88	95	96	49
1783	chr10	3099455	3101804	101	313	188	110	69	69	76	80	81	76	135	123	32	30	49	225	299	94	198	319	101	238	230	90	166	144	102	171	138	237	264	109	230	168	200	99	180	163	115
1784	chr10	3156039	3158148	34	54	38	42	16	30	26	55	30	36	35	48	10	11	16	65	75	23	36	42	10	46	37	17	45	36	17	25	24	28	40	16	18	10	32	12	35	44	17
1785	chr10	3169702	3173099	45	59	50	55	43	57	65	62	33	101	104	128	40	32	43	73	89	55	33	52	24	74	44	55	86	37	29	50	23	63	55	34	29	11	76	29	61	67	32
1786	chr10	3173493	3174870	15	27	22	12	12	15	23	10	6	51	29	56	18	15	10	16	33	20	13	17	14	30	11	31	26	10	9	16	18	14	33	10	8	4	22	7	25	15	14
1787	chr10	3204363	3205161	289	643	210	182	104	84	123	147	196	85	178	131	55	65	73	434	599	201	284	517	170	434	295	116	289	278	227	314	296	449	633	189	371	390	311	182	364	310	222
1788	chr10	3516313	3518019	15	23	40	9	11	36	40	103	83	165	193	157	89	95	120	159	230	333	4	18	23	21	7	29	39	2	4	5	19	35	34	19	44	16	56	5	62	64	33
1789	chr10	3805746	3819690	1030	1956	1374	956	758	954	1443	1109	950	917	1164	1140	611	683	776	1746	2615	1070	1068	1205	849	1594	1685	907	2950	1044	775	1358	1037	1673	2096	701	1675	1415	1676	806	1476	1772	773
1790	chr10	3843003	3844117	5	8	21	20	15	31	45	31	9	45	35	38	25	25	38	14	20	18	7	10	22	10	19	15	48	9	13	15	8	14	39	17	29	22	46	9	17	24	17
1791	chr10	5444349	5444931	37	111	40	28	32	19	24	11	12	15	33	20	12	8	11	53	68	25	38	99	27	66	34	16	29	44	21	38	49	73	59	31	56	37	48	19	47	36	32
1792	chr10	5478261	5478891	47	130	68	3	1	2	5	15	14	43	66	45	24	23	20	5	6	4	0	21	38	78	36	22	47	75	49	91	51	63	167	56	28	46	40	54	62	70	42
1793	chr10	5765942	5767970	119	234	200	98	82	68	100	85	91	116	206	149	89	74	110	201	281	150	158	190	119	242	204	136	215	148	137	179	126	221	358	142	230	187	206	101	219	220	115
1794	chr10	5839065	5840328	7	17	21	17	7	16	26	11	4	44	48	51	21	17	22	11	13	22	9	17	12	16	5	37	22	8	7	6	7	13	26	11	2	2	29	3	14	11	14
1795	chr10	5840531	5842484	15	18	48	43	31	33	43	35	18	78	97	90	40	47	39	18	45	54	11	34	19	36	16	43	43	12	15	20	5	28	38	26	10	12	66	10	9	16	33
1796	chr10	5894262	5897872	340	713	459	283	229	209	270	219	214	331	450	390	173	188	192	573	769	373	409	476	261	532	419	247	508	358	287	333	305	503	711	275	608	463	556	256	465	464	337
1797	chr10	5898090	5898967	4	12	27	13	7	14	20	15	8	39	39	35	16	16	25	11	7	33	6	10	16	10	7	19	34	4	12	11	2	11	17	7	10	9	30	5	12	11	11
1798	chr10	5922187	5923302	51	106	73	57	42	65	66	72	54	82	103	92	31	44	69	105	197	55	74	64	53	116	168	57	205	53	29	61	51	76	106	48	154	105	117	75	127	112	61
1799	chr10	5970604	5973008	209	564	235	168	124	66	106	62	101	57	128	107	51	46	52	397	517	153	293	495	162	327	294	92	205	184	156	243	272	431	504	188	348	314	261	181	267	228	165
1800	chr10	5977641	5978928	18	17	37	24	23	28	28	34	26	48	51	57	27	30	46	20	33	43	7	18	16	22	13	26	54	13	18	29	19	36	55	15	33	35	31	15	34	32	20
1801	chr10	6053137	6054179	3	15	18	12	9	16	12	14	8	19	29	35	12	9	12	7	29	28	7	8	12	19	25	28	60	3	6	9	1	9	15	7	13	8	18	6	17	20	9
1802	chr10	6057833	6060444	170	270	162	99	69	69	103	100	98	87	153	123	54	46	63	226	297	142	161	243	113	209	229	113	222	144	112	159	144	242	390	130	218	227	225	110	184	196	111
1803	chr10	6132527	6133453	21	35	27	12	7	17	27	32	18	40	49	37	23	35	31	43	59	32	33	15	17	55	63	30	126	30	17	31	17	21	42	14	54	34	50	23	44	66	15
1804	chr10	6170716	6171902	74	215	80	67	47	31	36	20	28	18	59	27	26	18	21	156	230	64	113	206	50	151	88	39	86	78	68	100	110	176	243	69	154	134	126	75	125	115	75
1805	chr10	6218143	6218859	7	10	10	32	32	18	33	12	6	3	4	8	7	5	5	17	31	11	3	7	7	6	10	5	14	14	3	11	5	9	11	6	37	17	27	7	22	19	6
1806	chr10	6222443	6224106	16	18	19	117	65	59	83	21	11	19	21	12	12	15	17	17	33	10	9	19	11	23	22	22	56	24	12	18	6	22	39	7	62	32	56	10	30	32	14
1807	chr10	6226456	6227385	92	255	87	76	47	30	47	32	52	34	63	56	27	30	24	175	266	69	93	170	52	176	116	51	89	80	66	121	117	173	263	72	128	187	113	68	106	102	61
1808	chr10	6245167	6247729	164	350	192	103	72	85	104	69	83	127	161	150	80	70	69	261	393	151	232	269	125	335	295	107	226	130	106	167	180	272	322	117	267	241	241	156	250	192	167
1809	chr10	6248992	6251012	8	29	52	47	24	34	39	36	18	81	85	48	38	57	51	23	39	47	20	27	22	52	25	40	45	14	22	19	21	34	65	25	11	17	80	17	30	38	28
1810	chr10	6283196	6284024	24	49	10	10	12	13	12	21	26	32	34	30	9	5	6	54	64	12	14	4	3	6	16	7	12	12	2	22	5	32	7	1	17	21	20	4	11	16	2
1811	chr10	6284386	6285818	178	377	91	246	160	118	174	73	103	42	88	81	23	32	31	265	383	89	181	132	51	118	149	53	183	93	30	143	98	212	105	40	110	153	88	49	126	182	31
1812	chr10	6315792	6316661	5	6	3	17	17	21	28	4	2	9	8	6	0	4	3	9	9	5	9	6	1	1	6	7	16	3	3	2	1	4	2	0	1	1	9	6	3	11	3
1813	chr10	6349201	6349654	3	2	5	18	18	19	25	9	7	3	3	5	5	4	3	2	2	5	4	3	7	2	2	4	5	0	1	2	2	0	4	1	2	2	4	0	0	2	1
1814	chr10	6352328	6353625	1	5	5	50	40	36	51	20	8	5	13	4	2	6	4	5	10	4	6	6	2	10	4	6	12	5	1	6	1	4	5	1	5	7	10	3	1	9	4
1815	chr10	6356755	6357633	15	26	31	55	42	46	73	32	26	13	18	16	12	9	10	21	41	18	55	45	22	40	56	19	59	11	4	10	12	23	17	6	33	55	51	5	19	35	4
1816	chr10	6381264	6383792	11	13	36	96	88	106	142	37	20	49	63	43	28	36	44	10	19	24	18	16	18	20	9	22	41	13	13	16	5	17	17	8	25	9	40	15	25	30	10
1817	chr10	7419268	7420319	4	5	10	16	8	23	17	27	15	33	56	39	29	25	18	9	6	10	5	3	15	7	7	25	43	4	14	16	7	6	15	3	21	4	17	5	11	17	10
1818	chr10	7489405	7494025	134	365	216	143	133	88	149	80	64	173	242	206	89	83	117	160	260	124	114	244	126	263	128	121	194	154	126	210	147	232	270	133	231	122	299	96	217	188	145
1819	chr10	7527365	7527953	2	8	26	21	12	21	23	12	5	36	44	37	12	18	17	4	9	12	5	2	15	5	0	6	18	9	11	7	2	7	9	6	22	7	29	1	1	9	5
1820	chr10	7552010	7555174	21	67	145	146	94	107	201	57	36	268	286	236	111	145	156	48	66	87	26	51	112	66	17	88	108	27	73	75	26	69	92	49	70	49	238	18	46	45	74
1821	chr10	7556439	7558317	6	29	37	20	22	20	14	10	10	100	110	130	68	47	65	10	7	12	8	10	17	12	6	15	8	12	20	17	17	22	34	15	9	7	22	14	15	15	13
1822	chr10	7562834	7563495	9	19	28	26	18	11	26	4	5	29	47	26	16	20	26	5	15	30	2	5	14	13	3	20	21	10	10	25	9	10	36	11	30	11	47	11	8	12	18
1823	chr10	7566354	7567762	21	48	74	98	55	63	71	46	20	111	115	111	53	61	59	42	74	107	19	34	45	37	24	82	116	21	33	32	20	43	80	34	52	31	124	17	28	30	38
1824	chr10	7574123	7574624	5	11	18	29	8	17	28	3	5	39	29	24	18	16	9	8	15	23	1	14	19	16	2	16	20	8	10	18	2	19	20	14	20	7	41	2	3	7	7
1825	chr10	7869498	7871104	161	404	168	173	102	80	138	128	96	151	221	212	113	96	89	243	404	192	157	389	118	313	250	160	289	242	166	202	178	252	560	151	265	215	312	120	273	247	166
1826	chr10	7890744	7892045	4	18	31	31	19	29	34	23	11	44	48	70	26	21	27	7	19	30	10	13	13	25	11	38	26	4	13	7	4	16	29	15	8	5	27	5	11	7	12
1827	chr10	7900069	7901069	147	303	122	101	70	63	74	51	52	74	133	101	50	43	45	298	389	147	135	299	92	252	195	83	154	146	96	136	149	227	390	124	192	178	204	108	193	201	111
1828	chr10	8135192	8138413	112	197	167	41	46	26	38	16	12	105	157	120	71	39	60	173	194	92	108	161	71	204	144	113	179	98	48	56	107	120	419	91	115	127	160	89	121	130	112
1829	chr10	8138504	8139497	13	20	31	5	10	19	26	7	8	46	63	52	24	24	23	15	33	16	12	31	16	28	15	28	37	3	6	10	19	33	74	33	45	41	66	15	38	37	31
1830	chr10	11227397	11227822	14	20	25	23	13	14	22	24	12	42	55	41	23	17	24	14	27	39	5	18	17	14	12	22	23	4	9	17	2	12	15	13	7	11	12	3	17	13	23
1831	chr10	11244980	11249105	134	287	311	310	237	222	348	320	224	526	612	498	262	294	269	341	533	453	224	326	208	380	304	408	612	112	136	184	134	266	369	187	111	105	200	126	279	241	189
1832	chr10	11249308	11250813	5	11	28	47	36	39	59	26	19	81	92	73	37	44	37	15	21	43	9	18	11	36	11	57	102	3	20	7	4	11	12	22	1	3	28	3	12	15	15
1833	chr10	11251658	11254658	15	26	64	73	81	112	123	95	44	184	220	146	84	104	78	32	61	107	24	24	44	55	54	118	195	12	31	29	13	28	31	31	14	16	58	13	29	29	46
1834	chr10	11257052	11262777	85	139	253	305	279	317	445	338	206	542	563	485	267	293	291	212	398	449	161	148	132	207	168	385	561	47	97	97	59	96	175	115	61	56	147	53	192	236	150
1835	chr10	11276909	11277794	2	4	14	22	18	31	30	30	14	45	56	51	15	27	26	8	10	21	6	9	8	21	11	31	47	0	7	5	1	3	8	2	1	5	16	5	7	12	13
1836	chr10	11278979	11280102	3	19	28	35	42	47	65	36	17	59	71	78	47	56	53	21	29	25	16	11	11	26	20	51	66	5	15	10	8	9	17	16	3	6	20	3	19	25	10
1837	chr10	11304984	11305835	8	10	9	14	13	8	14	15	9	29	33	43	12	10	15	10	29	17	9	10	3	24	14	21	30	8	5	8	3	14	11	7	2	3	9	5	14	8	11
1838	chr10	11307283	11307789	2	2	8	6	5	5	9	10	2	26	24	22	4	12	7	2	9	12	2	3	2	16	1	10	19	0	5	4	0	2	6	5	1	1	3	0	2	4	2
1839	chr10	11307979	11309898	24	36	36	46	33	39	30	65	48	72	109	102	45	36	49	60	70	55	21	30	26	70	54	74	97	25	20	13	9	20	42	14	18	9	22	23	45	76	19
1840	chr10	11314374	11315236	2	8	26	18	15	12	13	26	17	35	44	33	18	17	19	13	11	22	6	5	14	18	10	40	57	0	8	6	2	6	7	8	1	4	17	2	6	12	6
1841	chr10	11317553	11318552	1	6	20	19	14	24	48	20	8	51	50	51	21	24	28	7	8	20	6	7	7	19	5	42	40	5	6	4	3	9	11	11	4	1	13	1	4	14	10
1842	chr10	11318832	11320192	9	20	39	28	22	38	34	48	24	66	66	69	25	31	24	25	35	33	9	15	18	47	26	39	71	4	6	14	15	17	21	9	7	3	20	11	27	32	19
1843	chr10	11323563	11326377	75	104	125	143	122	151	208	137	99	249	318	296	129	158	141	85	133	146	56	106	89	205	159	216	309	64	73	110	82	103	187	86	76	79	136	89	215	221	103
1844	chr10	11326600	11329489	32	43	67	189	158	181	236	172	101	243	298	264	140	152	176	55	75	101	38	53	52	104	53	127	170	19	35	38	52	64	63	59	43	49	80	59	146	188	110
1845	chr10	11337825	11338464	7	7	12	10	5	11	11	18	7	32	30	42	16	26	15	8	12	11	1	8	3	12	12	22	20	1	4	4	3	5	6	3	4	2	5	4	11	15	7
1846	chr10	11342817	11344718	8	19	35	28	25	28	56	53	48	100	148	122	36	53	51	18	40	39	8	18	19	47	42	80	115	3	8	13	7	18	17	15	7	4	22	9	15	24	26
1847	chr10	11345551	11345846	0	0	7	6	4	6	8	1	2	17	12	12	6	11	3	1	6	6	3	2	5	5	1	16	11	0	0	0	0	3	1	1	2	0	3	1	3	3	4
1848	chr10	11346759	11347307	2	1	5	4	7	11	17	10	11	22	34	24	18	11	11	3	5	16	5	4	7	5	4	8	29	0	7	1	2	1	2	9	2	1	10	3	4	5	4
1849	chr10	11347442	11349023	4	14	28	21	18	18	30	21	7	82	76	81	28	36	24	20	24	32	5	14	8	25	13	59	56	5	7	6	3	9	8	9	7	8	14	6	12	12	22
1850	chr10	11349259	11349937	3	2	13	8	9	7	10	5	5	41	25	36	8	13	8	4	9	16	6	3	2	14	1	23	23	0	2	5	0	2	8	5	3	2	10	1	0	5	5
1851	chr10	11351241	11353212	22	25	38	48	38	38	64	52	37	91	109	128	37	33	47	36	65	48	23	35	24	73	61	80	107	12	15	16	9	35	30	31	10	12	25	17	45	55	25
1852	chr10	11353986	11355642	15	20	27	21	23	25	49	41	23	64	104	91	38	47	38	36	37	42	15	33	10	82	69	98	121	3	17	17	9	24	18	11	9	7	18	10	29	32	24
1853	chr10	11360658	11361060	6	4	11	11	4	6	4	8	7	12	25	25	6	7	14	7	13	10	5	7	1	10	2	11	16	1	6	4	3	3	4	3	1	0	0	2	8	19	3
1854	chr10	11361901	11367145	58	172	110	98	58	63	99	216	131	215	302	329	106	111	127	166	289	120	65	98	53	283	223	142	377	41	48	63	65	71	77	46	24	13	62	44	201	202	92
1855	chr10	11367246	11367794	6	9	4	8	8	5	9	13	10	37	25	29	11	10	14	13	13	6	4	5	2	16	10	14	20	1	1	1	8	2	9	4	1	1	3	4	7	15	8
1856	chr10	11369720	11370624	7	9	15	15	9	11	19	17	17	41	44	57	16	8	20	23	28	20	8	15	12	27	17	28	35	3	9	3	2	16	8	9	4	2	4	7	14	18	9
1857	chr10	11381223	11381665	4	11	3	6	3	2	4	6	2	11	11	15	8	6	3	13	18	4	8	3	1	20	16	5	12	2	0	2	2	8	7	1	2	2	4	10	10	6	4
1858	chr10	11384654	11385504	5	3	9	13	8	12	16	16	7	45	35	37	6	18	16	4	18	13	5	5	6	14	11	22	31	6	6	9	4	5	6	7	3	0	4	8	9	9	7
1859	chr10	11387272	11388425	11	9	16	21	11	12	22	38	16	44	43	63	29	24	30	19	22	21	8	16	8	22	18	31	37	7	10	11	2	19	16	4	5	4	14	11	15	33	15
1860	chr10	11407270	11407481	0	0	5	2	5	4	9	3	0	11	14	10	5	5	6	5	5	4	2	4	0	2	3	6	7	2	1	2	0	4	1	1	1	0	0	0	3	3	2
1861	chr10	11407552	11411230	27	49	53	62	39	69	74	98	60	165	187	222	69	67	87	69	116	82	50	44	23	111	77	107	147	15	19	37	20	44	28	34	17	11	40	23	56	65	48
1862	chr10	11416766	11418490	21	33	41	32	29	40	43	61	24	101	113	137	48	49	53	42	72	52	37	39	18	66	83	68	107	18	20	15	18	34	35	16	5	3	23	17	54	62	30
1863	chr10	11418779	11420759	24	52	39	37	29	66	46	82	54	136	160	145	56	57	50	34	74	72	33	38	21	92	75	77	122	13	16	32	35	40	42	22	8	10	24	19	68	70	21
1864	chr10	11530442	11531378	9	11	20	19	19	18	20	14	10	60	63	58	23	31	29	5	13	24	0	6	23	23	12	30	41	6	10	8	3	9	7	9	19	6	23	6	11	13	6
1865	chr10	11534547	11534969	1	5	3	4	3	2	4	2	2	18	30	28	11	14	11	2	2	7	1	0	3	7	0	8	13	4	2	6	1	5	4	2	1	0	8	0	4	2	5
1866	chr10	11535946	11537383	18	18	23	14	5	12	18	39	22	64	65	91	39	32	34	29	39	21	7	14	13	33	30	25	62	18	13	13	8	25	30	8	19	4	34	23	48	72	15
1867	chr10	11539119	11539656	4	6	13	3	2	3	6	14	9	27	27	27	10	10	16	2	4	6	1	2	4	10	14	8	20	5	3	3	1	3	7	3	8	1	9	3	10	15	7
1868	chr10	11690209	11694810	149	335	266	104	67	95	129	204	125	344	423	369	152	197	190	180	240	188	118	219	166	256	149	175	386	129	150	196	162	241	371	146	278	269	336	121	191	196	183
1869	chr10	11746037	11746832	28	41	44	5	6	7	6	12	8	27	42	38	28	29	28	10	16	18	4	19	23	22	23	20	56	29	20	45	9	25	44	17	47	46	61	24	40	47	20
1870	chr10	11764236	11768241	108	204	278	250	142	189	266	141	109	425	468	403	203	209	245	183	263	249	72	98	191	203	174	215	413	132	154	219	93	180	267	119	273	190	374	127	277	267	215
1871	chr10	11824058	11824761	25	34	12	6	4	2	2	4	8	10	19	16	4	10	4	20	32	8	4	16	13	9	13	8	19	20	9	17	9	16	25	8	49	40	31	16	14	27	10
1872	chr10	12000272	12001030	4	8	13	7	4	10	14	11	1	27	43	43	16	11	12	5	19	9	5	8	1	12	11	11	25	5	4	4	9	11	25	5	7	4	28	9	16	12	7
1873	chr10	12123446	12126651	201	263	322	230	146	211	314	329	249	316	410	348	202	222	260	226	427	310	198	210	205	247	286	262	646	188	169	208	132	246	367	176	324	295	430	146	342	451	209
1874	chr10	12144515	12145420	0	5	3	3	4	3	2	6	2	59	59	56	27	26	35	1	3	3	8	2	7	7	3	4	4	1	3	2	4	20	15	14	5	10	15	1	25	20	24
1875	chr10	12150419	12151493	117	277	158	116	79	86	106	144	111	92	158	106	61	58	74	205	300	161	129	250	107	185	167	103	155	109	98	155	141	168	318	98	166	170	220	94	199	194	107
1876	chr10	12211120	12212106	120	220	109	68	58	43	70	27	60	53	123	78	35	40	34	161	218	78	99	200	76	151	153	41	114	113	74	118	95	152	242	97	164	140	138	85	146	146	84
1877	chr10	12277382	12278707	125	245	198	150	108	102	158	117	102	182	242	189	100	107	119	178	344	213	119	221	147	211	208	158	311	159	109	161	125	196	363	159	249	158	285	105	245	207	151
1878	chr10	12430540	12432947	110	266	114	91	63	55	71	73	77	77	126	98	44	33	56	221	309	87	209	176	81	226	239	87	221	157	86	135	176	239	247	99	244	221	128	113	172	169	113
1879	chr10	12566567	12567754	19	36	33	20	10	16	19	12	16	75	69	64	32	43	41	89	119	92	67	93	37	114	96	74	192	23	10	19	28	45	77	26	67	45	55	31	87	77	43
1880	chr10	12687488	12688622	29	46	46	12	8	14	20	29	19	51	56	59	29	22	33	15	38	15	24	23	45	58	56	36	62	72	31	51	38	91	140	28	98	80	85	62	87	112	42
1881	chr10	13181512	13182826	58	106	45	31	31	30	28	16	24	27	48	36	24	21	17	95	150	38	60	76	24	70	74	20	73	74	40	83	51	82	117	48	79	87	75	44	62	72	44
1882	chr10	13240349	13240929	2	5	3	3	2	4	4	1	1	1	1	3	0	1	0	6	3	0	27	21	10	30	19	9	29	10	4	7	14	11	9	3	13	12	13	2	5	0	2
1883	chr10	13243170	13243905	33	83	37	27	26	15	13	10	10	17	30	25	7	13	9	45	58	26	24	79	26	51	27	14	22	47	38	35	42	62	82	28	61	28	55	20	56	36	28
1884	chr10	13381283	13382598	100	232	120	57	37	34	44	58	62	58	74	61	36	32	26	172	249	85	120	180	70	146	225	49	107	75	61	96	100	131	253	85	156	198	125	81	96	109	55
1885	chr10	13383893	13384628	101	160	110	57	36	44	61	84	60	94	144	109	76	61	73	168	233	93	105	153	58	149	174	64	195	106	59	87	72	129	243	82	132	130	128	73	125	130	53
1886	chr10	13428269	13432309	128	329	237	173	108	94	151	68	45	151	224	159	78	66	64	304	358	197	175	328	143	275	207	176	204	182	179	205	234	365	433	166	346	234	302	116	206	184	182
1887	chr10	13668623	13669329	61	139	80	41	39	40	54	37	41	80	93	90	46	57	54	134	213	73	62	105	55	122	125	53	138	71	41	58	57	84	151	53	102	97	112	68	112	101	45
1888	chr10	13726122	13728722	13	17	21	74	36	51	65	65	33	149	164	145	42	62	63	24	22	34	9	13	13	27	24	70	47	17	7	8	23	44	106	51	13	7	33	16	21	23	35
1889	chr10	13729887	13730683	1	6	7	23	10	13	12	13	3	36	32	46	9	15	23	8	4	8	4	3	5	3	8	18	17	8	2	1	11	12	33	15	5	0	15	7	7	5	9
1890	chr10	13731178	13733476	7	6	32	72	31	53	49	41	15	74	100	93	35	31	43	6	14	17	11	14	8	21	15	32	38	13	14	6	9	28	61	25	17	16	45	21	16	12	15
1891	chr10	13735635	13737742	7	10	23	56	38	28	46	30	25	71	97	87	31	18	28	14	17	21	10	10	7	25	15	45	23	10	3	11	12	31	65	21	12	9	33	19	9	18	19
1892	chr10	13771035	13771257	8	16	3	5	4	9	0	6	1	5	7	4	4	7	6	7	44	2	12	10	1	4	8	1	4	1	1	1	31	23	7	1	1	4	3	10	22	11	1
1893	chr10	13775573	13776661	4	7	8	40	20	20	27	40	21	37	46	55	21	26	25	4	13	9	4	2	4	24	13	18	21	9	0	2	12	17	59	15	4	3	19	10	8	12	11
1894	chr10	13785118	13785796	1	3	7	30	12	9	11	14	7	37	28	26	10	15	19	5	2	4	2	2	2	6	2	8	14	2	2	1	5	9	34	8	4	5	21	8	4	5	2
1895	chr10	13785937	13791053	30	45	142	303	199	136	157	193	103	465	641	498	222	222	285	66	66	97	77	61	55	128	146	303	270	66	33	43	137	240	479	203	94	168	239	127	113	88	142
1896	chr10	13824875	13825890	7	5	15	47	30	19	55	20	16	35	56	30	30	25	27	5	21	22	7	8	6	11	7	9	12	11	10	9	15	15	16	14	10	8	31	7	21	12	13
1897	chr10	13832373	13833679	2	3	13	56	50	33	50	28	15	39	39	24	21	12	22	21	8	36	3	7	5	9	3	26	30	3	4	1	1	4	18	11	2	12	14	6	8	6	9
1898	chr10	13838876	13842253	8	29	76	132	110	108	121	55	27	239	225	187	103	105	103	26	40	91	25	20	31	56	16	86	69	32	24	22	35	55	176	100	29	31	95	40	22	37	49
1899	chr10	13842389	13843878	0	13	25	28	27	19	22	25	17	75	82	60	44	49	43	7	5	40	6	3	5	10	5	42	24	8	3	9	6	23	52	39	4	7	28	2	7	12	9
1900	chr10	13847622	13848726	4	3	17	68	39	15	30	9	3	10	14	18	8	12	6	0	1	5	0	2	11	0	4	8	5	10	5	7	13	45	32	38	22	21	69	5	2	7	22
1901	chr10	13868814	13869547	11	14	37	23	40	32	47	17	13	50	58	52	32	43	29	29	58	52	14	20	31	13	21	37	54	19	17	25	8	22	44	25	36	39	72	11	19	19	13
1902	chr10	14089585	14092445	14	46	81	131	153	174	247	48	30	5	14	9	7	4	4	101	180	188	16	16	14	10	5	9	13	10	4	3	6	12	12	14	5	10	29	25	9	17	5
1903	chr10	14266720	14268457	282	428	1066	2048	1102	1467	2152	1715	1015	1338	1440	1380	483	608	679	1040	1598	2431	214	491	525	823	403	1297	1655	436	421	604	295	652	309	479	1105	360	844	367	703	603	497
1904	chr10	14677704	14679306	19	36	47	48	29	45	59	45	28	37	26	44	13	21	22	23	49	30	29	30	28	30	12	17	67	22	20	23	14	21	13	11	39	16	47	6	19	52	16
1905	chr10	14680314	14681683	14	16	46	49	22	41	64	43	32	29	21	31	16	19	25	13	37	30	28	18	14	17	16	14	43	25	11	27	8	12	17	14	25	15	39	14	17	34	13
1906	chr10	14683442	14684672	8	12	42	63	50	62	66	37	16	41	35	26	27	29	19	22	37	42	26	32	22	14	19	29	52	12	25	18	10	20	27	17	21	24	41	10	17	29	9
1907	chr10	14685347	14687921	201	503	212	290	153	147	188	73	132	79	142	96	65	78	57	276	375	129	288	414	174	207	106	72	167	131	190	315	196	402	405	134	262	301	199	124	153	135	123
1908	chr10	14730064	14730853	6	14	21	40	33	28	45	15	14	30	38	32	20	20	28	10	13	31	11	17	10	19	15	24	26	9	12	18	2	8	10	9	7	14	21	5	6	13	6
1909	chr10	14741625	14742252	6	6	23	24	13	17	26	12	6	35	26	21	14	15	27	8	11	12	17	5	19	11	6	20	26	3	6	2	5	6	10	5	14	14	34	3	7	6	7
1910	chr10	14919273	14921176	195	409	183	111	83	75	107	119	104	95	173	133	81	54	70	275	413	149	189	335	99	297	270	93	232	206	124	180	156	229	343	132	251	226	235	150	287	215	131
1911	chr10	14959918	14961690	149	337	138	136	97	63	87	47	61	79	147	94	50	44	55	235	321	129	137	348	87	225	167	79	153	186	140	171	151	227	393	135	216	137	193	100	178	184	157
1912	chr10	14988666	14990191	10	23	32	27	16	17	27	11	7	67	46	48	19	17	27	7	21	36	8	18	20	25	8	34	30	12	12	7	10	15	21	15	16	1	58	5	13	22	16
1913	chr10	14990452	14991490	5	10	31	27	14	23	20	8	5	27	59	44	7	24	21	4	7	25	9	12	8	13	3	36	12	8	13	12	4	20	17	11	11	3	25	5	8	14	17
1914	chr10	14992822	14993345	6	5	15	15	4	14	12	11	4	23	26	30	9	10	17	8	6	14	3	7	8	12	4	16	11	5	8	8	7	14	7	8	6	0	23	0	10	8	9
1915	chr10	14993741	14994191	0	3	8	9	4	18	16	6	2	15	32	31	6	2	11	2	1	11	2	3	6	2	0	12	11	1	7	4	5	4	3	6	4	2	14	1	0	4	10
1916	chr10	15034656	15036734	125	290	234	169	126	118	190	90	114	206	269	217	102	113	132	234	343	229	169	256	144	287	202	165	260	270	189	239	132	232	348	99	305	163	332	110	221	160	136
1917	chr10	15041010	15042732	151	300	270	175	125	140	169	117	99	239	313	245	151	124	145	247	373	201	127	301	179	253	202	181	264	259	238	312	179	266	462	161	258	248	339	142	251	190	169
1918	chr10	15178861	15180292	177	439	236	145	110	102	116	85	100	125	163	147	73	57	88	327	443	155	245	374	125	349	267	126	314	199	143	224	175	311	465	140	288	305	264	178	352	276	150
1919	chr10	15249822	15252040	93	178	102	44	31	22	35	38	62	44	106	52	30	24	33	126	173	62	114	182	60	65	60	31	55	121	68	130	103	149	221	61	101	125	91	56	70	61	44
1920	chr10	15941589	15943494	71	132	153	78	64	78	90	69	46	129	212	161	85	83	99	122	204	172	94	138	97	144	146	105	183	116	96	145	61	132	259	102	126	129	212	85	143	144	92
1921	chr10	16518571	16520038	66	167	157	133	79	91	108	86	79	108	152	113	65	54	69	169	211	135	80	163	72	147	149	96	157	107	75	92	65	125	252	97	160	122	195	75	115	120	89
1922	chr10	16898866	16900358	168	266	198	162	123	129	149	120	115	176	235	196	109	123	123	220	342	220	92	334	106	259	191	139	248	145	123	184	124	169	404	143	165	200	297	85	207	181	144
1923	chr10	16973443	16974450	8	22	88	132	62	120	191	26	11	469	423	396	157	221	217	18	26	61	4	9	42	30	9	66	61	14	43	28	11	37	40	32	98	16	112	10	26	41	44
1924	chr10	17283012	17284003	56	123	74	49	33	19	36	22	17	42	75	62	22	23	31	124	151	59	27	60	42	55	19	18	51	55	60	62	63	95	137	46	136	102	121	47	112	98	49
1925	chr10	17309725	17314984	264	603	342	362	275	246	351	73	61	199	306	234	104	126	136	468	683	390	97	336	234	179	43	113	141	398	320	531	314	558	700	226	524	390	685	114	426	272	303
1926	chr10	17698700	17699831	50	52	46	21	7	3	7	3	4	10	16	14	6	7	6	15	10	5	22	68	33	14	2	6	6	48	37	68	39	58	163	30	74	18	85	32	34	52	46
1927	chr10	17725180	17726924	96	161	165	129	101	94	149	103	70	177	236	202	128	110	108	160	269	164	98	199	108	144	154	116	236	112	113	127	96	159	315	142	198	162	275	74	182	173	107
1928	chr10	18727916	18730106	15	11	28	71	34	85	85	15	2	13	5	14	6	7	8	1	2	5	0	5	14	2	4	4	6	29	21	18	20	18	53	19	53	20	85	22	61	108	47
1929	chr10	18956600	18956961	3	14	14	4	4	4	10	5	6	12	15	17	7	11	11	9	26	8	7	8	8	4	6	7	6	9	5	11	11	6	9	6	9	10	11	20	14	20	6
1930	chr10	18979432	18981189	102	163	173	124	83	117	146	117	83	198	257	214	122	115	148	159	236	211	91	182	118	130	129	148	205	106	98	144	77	128	277	106	130	126	268	64	157	118	110
1931	chr10	18986951	18989552	184	333	320	191	133	159	221	235	220	284	327	265	145	184	153	310	424	271	195	273	185	257	254	166	336	214	183	215	156	279	478	176	351	293	403	162	305	328	200
1932	chr10	20144337	20146580	10	9	6	8	9	6	12	3	4	8	5	6	5	2	4	5	10	1	5	27	29	14	1	15	13	41	21	32	31	42	95	31	30	17	54	21	17	23	14
1933	chr10	21701863	21702330	6	11	30	32	23	32	39	18	13	21	31	26	12	13	19	2	16	18	3	6	8	11	12	28	24	16	14	7	5	10	13	4	10	4	13	9	22	11	12
1934	chr10	21824567	21826241	31	47	38	38	20	18	24	25	31	34	45	28	27	19	14	67	84	35	29	41	20	49	50	27	36	43	21	30	23	36	114	20	44	32	49	21	25	31	24
1935	chr10	21851032	21851404	26	41	27	4	4	4	5	4	5	2	0	3	37	33	47	80	83	6	69	63	22	23	18	4	34	14	14	8	79	92	13	17	48	39	35	16	29	18	14
1936	chr10	21854176	21856617	64	150	104	97	75	53	81	55	60	97	147	112	55	56	52	203	306	97	144	117	54	182	193	85	184	126	68	99	71	144	302	80	280	219	208	84	204	166	119
1937	chr10	21861759	21864504	165	386	212	165	117	90	152	72	104	136	194	146	89	74	80	270	429	186	224	325	117	282	220	122	223	190	121	198	166	309	427	155	274	238	278	113	195	205	170
1938	chr10	22331497	22333382	173	318	219	123	68	70	90	155	152	116	199	148	68	79	86	325	439	217	167	322	113	217	240	128	250	160	121	188	138	251	406	130	323	250	259	112	207	229	156
1939	chr10	22580352	22582773	93	136	135	36	22	17	32	98	99	104	153	115	72	60	55	263	371	136	135	81	81	203	277	87	263	74	44	63	81	105	230	81	273	140	185	156	294	263	122
1940	chr10	22644790	22646384	180	366	256	149	122	91	138	149	97	147	210	178	108	87	94	343	468	220	214	307	172	281	300	126	301	168	152	215	243	330	608	188	341	391	331	159	279	280	186
1941	chr10	22649251	22651086	98	179	99	55	43	17	29	32	38	37	69	49	24	24	22	171	233	85	93	122	76	144	146	43	136	58	72	116	105	179	208	91	195	164	105	101	156	141	103
1942	chr10	22654232	22655005	20	28	10	8	6	3	17	10	8	5	15	15	7	10	10	35	50	16	14	20	10	20	14	9	19	16	8	16	14	25	46	13	26	35	27	17	24	31	9
1943	chr10	22663949	22666115	103	94	75	12	12	17	15	28	17	15	22	26	10	13	9	24	45	20	35	50	48	55	63	29	98	56	39	48	32	73	139	36	171	175	117	99	159	174	50
1944	chr10	22668983	22670684	110	201	131	57	47	57	48	50	72	83	127	96	48	48	60	181	260	95	127	145	95	152	177	69	147	98	72	98	93	166	323	119	247	253	205	130	204	217	120
1945	chr10	22674079	22674606	21	23	10	0	4	0	1	3	2	0	0	0	3	0	0	20	19	3	6	18	12	28	15	5	16	11	7	8	14	12	47	10	34	52	26	31	11	15	5
1946	chr10	22765183	22767165	209	398	285	73	39	35	62	137	156	135	206	190	90	88	100	422	675	301	286	199	157	272	366	109	375	249	153	241	212	301	575	163	504	580	391	258	397	426	224
1947	chr10	22862356	22863285	1	5	13	17	8	10	21	25	9	31	32	32	12	9	17	7	13	17	9	5	9	8	10	17	15	5	14	6	2	8	22	14	11	3	16	9	6	7	7
1948	chr10	22935144	22935688	5	20	20	31	19	30	30	21	12	13	29	27	12	13	15	14	38	31	6	18	16	16	12	23	40	12	12	16	13	13	35	11	29	12	40	7	10	19	5
1949	chr10	22944595	22945509	21	43	44	40	31	32	51	65	30	18	22	16	14	14	8	54	89	57	31	38	21	44	65	39	93	38	34	39	15	23	32	9	67	28	73	11	59	46	28
1950	chr10	22958956	22960409	9	9	35	43	42	44	68	55	24	42	70	46	27	28	32	28	46	50	5	12	31	19	13	43	92	15	18	22	15	21	42	21	27	33	75	12	13	30	16
1951	chr10	23011068	23013032	15	20	59	33	25	33	50	95	44	67	96	82	49	53	52	26	55	89	21	20	28	40	30	67	159	19	24	18	8	32	33	36	52	32	95	22	42	42	27
1952	chr10	23033264	23034339	15	13	23	14	11	32	32	26	22	46	46	40	22	26	26	11	26	28	6	11	10	13	15	18	53	7	14	18	5	11	20	15	24	16	28	4	18	23	9
1953	chr10	23039060	23039772	5	9	8	29	24	30	33	20	11	17	24	24	11	15	13	4	21	19	1	9	8	12	14	11	42	1	6	9	2	2	14	7	9	4	26	4	5	16	3
1954	chr10	23041858	23044466	215	460	201	130	93	40	95	49	87	60	127	90	47	42	45	400	429	115	246	379	130	292	232	101	194	169	150	216	261	365	490	160	411	345	246	162	193	176	143
1955	chr10	23051650	23053200	12	10	21	21	23	23	22	13	8	70	82	66	39	52	45	16	21	30	5	13	32	18	21	29	44	14	15	32	8	30	51	21	34	20	63	28	28	41	15
1956	chr10	23256552	23257088	11	26	14	2	0	7	5	2	3	11	6	8	8	3	10	3	3	3	7	19	10	11	7	1	13	15	11	28	25	37	61	20	26	24	48	6	3	8	5
1957	chr10	23424298	23425550	93	143	89	50	50	36	37	48	68	33	78	52	24	21	27	139	175	70	75	165	73	120	84	64	102	81	57	97	77	141	187	65	131	120	130	66	73	71	84
1958	chr10	23767390	23769572	130	265	99	46	32	36	36	57	70	25	58	52	36	20	28	120	201	76	133	235	98	157	134	53	139	96	89	138	123	208	283	85	205	209	173	79	180	129	92
1959	chr10	24537686	24539430	12	10	10	14	19	20	29	21	18	17	23	10	16	15	16	24	39	16	14	9	9	6	17	14	41	13	4	12	10	28	25	21	66	62	55	15	57	51	19
1960	chr10	24712220	24713207	5	11	8	13	19	18	29	10	12	15	24	17	13	19	16	13	23	9	24	8	2	10	41	17	40	6	3	11	15	25	17	15	33	27	38	35	66	78	23
1961	chr10	25051379	25054093	185	329	184	210	150	110	156	107	119	119	193	112	58	47	46	353	482	166	362	438	114	344	325	134	206	177	140	227	179	286	467	143	218	236	244	127	161	144	138
1962	chr10	25216431	25217002	3	6	12	16	11	23	29	15	10	20	25	27	11	7	15	6	8	30	2	12	17	3	4	15	32	3	12	6	10	7	13	3	8	13	22	3	8	14	8
1963	chr10	25229690	25231770	9	9	28	149	79	71	108	12	5	46	41	30	16	17	12	10	15	21	13	19	17	17	5	23	18	14	30	19	16	28	53	25	24	18	85	13	17	15	23
1964	chr10	25280408	25282387	37	58	39	98	71	51	78	22	19	19	28	28	5	15	8	26	32	10	67	42	25	21	31	9	11	31	16	25	23	58	82	22	85	44	76	51	48	47	29
1965	chr10	25344999	25346591	111	220	168	123	93	72	104	103	106	177	202	150	78	88	107	184	316	196	257	344	153	211	202	156	178	121	95	113	124	249	481	170	207	156	275	100	165	155	174
1966	chr10	26663631	26664898	7	12	19	8	5	9	19	16	10	56	41	63	22	24	21	20	18	37	6	15	22	24	13	30	40	7	9	11	4	9	14	7	28	18	40	11	17	21	11
1967	chr10	26720587	26721443	6	22	12	1	3	2	0	3	5	3	7	17	4	3	11	4	0	2	5	1	0	22	28	6	17	8	5	10	9	22	4	6	3	3	7	15	15	11	5
1968	chr10	26759278	26760159	6	9	41	13	17	27	32	18	11	63	57	46	27	38	37	14	21	36	9	10	22	12	13	39	57	11	31	37	7	8	32	28	29	41	65	10	19	20	26
1969	chr10	26766389	26769356	168	303	220	137	107	100	147	154	144	245	360	282	135	141	162	270	425	253	158	276	147	273	263	217	336	182	131	245	175	256	361	210	314	244	329	117	249	171	142
1970	chr10	26776286	26776825	1	3	17	4	11	8	13	29	9	29	37	26	24	20	18	5	7	17	2	1	2	4	10	17	17	1	5	0	3	3	10	12	10	4	14	3	4	1	5
1971	chr10	26777290	26778527	6	15	34	16	26	24	25	31	14	61	61	59	39	29	32	15	16	41	6	11	12	18	8	18	55	6	10	17	7	21	23	10	15	15	43	5	7	8	11
1972	chr10	26785742	26786667	5	12	35	11	14	14	15	23	12	56	62	50	20	25	31	13	19	31	6	17	20	19	7	31	37	7	12	17	6	16	26	10	10	8	39	6	16	13	15
1973	chr10	26838126	26839021	5	4	14	3	5	8	9	13	5	29	32	31	11	14	11	7	5	11	2	1	3	6	3	11	11	3	8	5	4	3	8	3	2	2	13	2	6	3	6
1974	chr10	27025623	27027355	165	432	233	175	121	112	143	70	80	118	228	164	76	77	86	313	409	155	234	334	160	392	236	136	238	192	184	208	215	384	429	137	386	277	254	200	306	241	184
1975	chr10	27066368	27067621	16	19	46	24	28	26	44	44	17	53	51	69	35	37	32	28	36	58	21	15	20	16	22	56	126	13	19	28	3	24	27	13	50	23	44	13	15	29	21
1976	chr10	27067808	27068780	10	17	28	3	14	17	24	43	19	60	52	65	16	39	32	26	30	44	19	11	16	17	24	46	97	8	19	27	5	11	22	13	26	23	38	13	8	20	17
1977	chr10	27070378	27070839	4	3	13	8	5	12	13	12	10	34	28	23	10	4	10	8	9	18	5	5	14	13	3	13	23	3	7	1	5	5	6	4	6	5	13	5	3	8	14
1978	chr10	27072205	27072891	3	8	12	7	7	8	11	7	3	32	22	27	15	11	13	10	7	11	2	3	3	12	4	19	15	4	5	2	0	8	8	4	3	3	14	1	2	2	9
1979	chr10	27188487	27190154	126	264	178	122	96	91	102	157	174	157	221	193	88	73	93	285	390	186	152	228	111	210	259	127	311	152	99	165	123	220	333	118	223	214	235	118	232	226	123
1980	chr10	27428754	27429964	109	342	182	151	122	103	131	102	118	213	284	220	124	126	137	257	385	221	119	360	112	239	221	131	223	174	111	149	130	221	449	174	185	213	289	125	232	176	147
1981	chr10	27482762	27485431	337	461	456	273	195	238	286	334	253	398	560	473	247	310	275	495	712	417	282	473	284	411	543	276	631	385	256	352	212	367	656	260	501	475	518	269	493	557	276
1982	chr10	27517355	27517716	3	4	5	11	6	4	11	8	1	14	28	19	4	8	3	3	7	4	4	3	0	5	4	4	6	3	2	5	0	4	8	3	2	1	11	0	1	9	4
1983	chr10	27569128	27572950	318	595	644	471	321	329	465	442	337	593	865	624	388	367	430	645	1025	666	407	714	442	626	693	491	968	353	361	425	289	507	993	355	617	591	913	342	587	593	418
1984	chr10	27581309	27581995	88	135	78	69	49	36	54	38	46	18	45	34	18	11	14	202	268	84	89	131	40	102	91	21	70	57	69	85	42	67	85	21	183	136	59	62	95	87	73
1985	chr10	27832680	27833807	120	264	139	103	87	76	89	106	94	168	213	197	109	103	128	198	335	175	157	250	92	244	194	111	272	115	106	169	116	163	346	109	155	174	228	73	182	155	117
1986	chr10	28860570	28863206	342	763	403	261	166	159	203	152	203	199	371	263	154	123	135	601	848	320	390	562	297	608	544	198	469	375	260	420	362	619	780	297	676	603	487	360	537	500	298
1987	chr10	28870860	28872228	2	12	14	29	25	35	37	16	14	64	50	44	34	35	30	13	18	26	10	17	11	17	8	44	46	10	13	8	4	19	23	11	24	4	41	5	8	15	11
1988	chr10	28883955	28884933	2	2	14	19	12	18	10	26	10	42	31	43	12	21	14	5	13	8	4	2	9	12	5	17	24	0	16	3	6	10	9	4	5	3	17	3	7	12	7
1989	chr10	28951699	28954384	23	21	58	62	38	44	65	42	17	138	120	152	53	65	56	28	37	68	15	23	37	45	26	80	70	15	24	40	17	39	54	26	16	20	77	17	40	62	23
1990	chr10	29006086	29006886	14	32	20	5	3	3	2	3	9	8	6	4	3	2	1	7	8	5	13	60	36	14	18	9	7	61	31	55	91	113	262	39	65	88	62	48	26	52	24
1991	chr10	29737911	29739104	58	128	73	11	5	4	7	38	27	46	95	62	32	32	35	100	148	94	64	144	33	109	129	62	100	66	42	55	41	71	139	47	47	35	106	42	18	23	31
1992	chr10	30064047	30065155	26	47	31	53	34	12	19	3	4	7	11	14	6	6	3	16	22	6	3	22	7	13	2	5	7	19	12	21	19	32	106	18	67	49	44	46	13	26	22
1993	chr10	30677501	30678602	24	53	52	46	34	37	53	40	22	70	74	74	28	40	48	57	114	71	46	63	22	73	75	56	75	64	39	44	28	44	92	35	55	40	84	27	44	49	33
1994	chr10	30761645	30764481	492	742	426	373	269	303	332	263	326	287	513	393	218	209	210	724	1027	394	500	650	270	483	700	314	789	449	252	454	393	529	915	338	689	576	604	298	567	657	316
1995	chr10	30764747	30768446	21	41	71	94	94	117	197	93	43	196	227	189	115	111	107	50	77	120	38	37	48	64	56	174	268	24	36	39	15	27	64	36	41	20	112	20	37	63	45
1996	chr10	30768814	30769642	5	3	15	20	16	42	44	20	10	37	18	28	21	15	14	7	17	15	8	4	10	9	7	21	60	4	6	7	3	4	7	8	9	2	20	4	4	10	7
1997	chr10	30770485	30773097	28	20	55	68	66	138	129	177	77	198	155	195	92	105	86	42	74	67	27	22	19	66	66	105	283	27	23	32	7	36	37	17	48	13	68	21	35	84	23
1998	chr10	30773253	30774120	5	6	10	10	10	19	30	13	8	40	55	39	18	15	24	7	12	11	4	1	7	18	12	33	32	1	3	4	5	5	6	8	4	4	10	3	3	17	2
[truncated: 17,062 more rows]
